# Supplementary material for: Co-Expression Network and Pathway Analyses Reveal Important Modules of miRNAs Regulating Milk Yield and Component Traits
Source: Int J Mol Sci. 2017 Jul 18;18(7):1560. doi: 10.3390/ijms18071560 (PMC5536048; doi:10.3390/ijms18071560)
Supplement: Supplementary file 1 [file ijms-18-01560-s001.zip]

Archive with 6 entries (6 files):
- ijms-208418-supplementary-layout Nicole.pdf
- Table S1. Target predicted for miRNAs .xlsx
- Table S2. Gene ontology for all modules .xlsx
- Table S2new. Gene ontology for all modules .xlsx
- Table S3. Singaling pathways for all modules by IPA.xlsx
- Table S4.Upstream transcription regulators for all modules.xlsx
