# Supplementary material for: Co-Expression Network and Pathway Analyses Reveal Important Modules of miRNAs Regulating Milk Yield and Component Traits
Source: Int J Mol Sci. 2017 Jul 18;18(7):1560. doi: 10.3390/ijms18071560 (PMC5536048; doi:10.3390/ijms18071560)
Supplement: Supplementary file 1 [file ijms-18-01560-s001.zip › Table S1. Target predicted for miRNAs .xlsx]

## Sheet: Table S1a.GREEN MODULE
Table S1a. Predicted Target genes for miRNA members of the GREEN module
miRNAs	TRANSCRIPT ID	UTR.start	UTR.end	context.score.percentile	ensembl_gene_id	hgnc_symbol
bta-miR-6522	NM_000028	1996	2003	97	ENSG00000162688	AGL
bta-miR-14-10137	NM_000038	1955	1961	96	ENSG00000134982	APC
bta-miR-3-34194	NM_000038	1955	1961	96	ENSG00000134982	APC
bta-miR-148a	NM_000052	36	43	95	ENSG00000165240	ATP7A
bta-miR-14-10137	NM_000055	188	195	99	ENSG00000114200	BCHE
bta-miR-3-34194	NM_000055	188	195	99	ENSG00000114200	BCHE
bta-miR-3-34194	NM_000097	266	273	97	ENSG00000080819	CPOX
bta-miR-14-10137	NM_000097	266	273	97	ENSG00000080819	CPOX
bta-miR-186	NM_000098	258	264	98	ENSG00000157184	CPT2
bta-miR-2285e	NM_000108	388	395	96	ENSG00000091140	DLD
bta-miR-2285c	NM_000108	388	395	96	ENSG00000091140	DLD
bta-miR-186	NM_000115	2315	2322	97	ENSG00000136160	EDNRB
bta-miR-186	NM_000115	226	233	97	ENSG00000136160	EDNRB
bta-miR-12-6501	NM_000127	303	310	98	ENSG00000182197	EXT1
bta-miR-13-7336	NM_000127	303	310	99	ENSG00000182197	EXT1
bta-miR-14-10137	NM_000139	103	110	98	ENSG00000149534	MS4A2
bta-miR-3-34194	NM_000139	103	110	98	ENSG00000149534	MS4A2
bta-miR-186	NM_000139	85	91	96	ENSG00000149534	MS4A2
bta-miR-3-34194	NM_000142	1234	1241	99	ENSG00000068078	FGFR3
bta-miR-14-10137	NM_000142	1234	1241	99	ENSG00000068078	FGFR3
bta-miR-186	NM_000158	165	172	99	ENSG00000114480	GBE1
bta-miR-186	NM_000214	567	573	95	ENSG00000101384	JAG1
bta-miR-12-6501	NM_000222	1997	2004	97	ENSG00000157404	KIT
bta-miR-13-7336	NM_000222	1997	2004	97	ENSG00000157404	KIT
bta-miR-14-10137	NM_000231	485	491	95	ENSG00000102683	SGCG
bta-miR-3-34194	NM_000231	485	491	95	ENSG00000102683	SGCG
bta-miR-148a	NM_000232	201	208	98	ENSG00000163069	SGCB
bta-miR-186	NM_000233	912	918	96	ENSG00000138039	LHCGR
bta-miR-200a	NM_000264	2573	2580	95	ENSG00000185920	PTCH1
bta-miR-186	NM_000297	218	224	95	ENSG00000118762	PKD2
bta-miR-148a	NM_000308	237	244	97	ENSG00000064601	CTSA
bta-miR-12-6501	NM_000313	1120	1127	98	ENSG00000184500	PROS1
bta-miR-13-7336	NM_000313	1120	1127	98	ENSG00000184500	PROS1
bta-miR-148a	NM_000314	3153	3160	96	ENSG00000283094	PTEN
bta-miR-148a	NM_000314	3153	3160	96	ENSG00000171862	PTEN
bta-miR-186	NM_000329	901	907	97	ENSG00000116745	RPE65
bta-miR-14-10137	NM_000332	7119	7126	99	ENSG00000124788	ATXN1
bta-miR-3-34194	NM_000332	7119	7126	99	ENSG00000124788	ATXN1
bta-miR-141	NM_000333	239	246	95	ENSG00000163635	ATXN7
bta-miR-200a	NM_000333	239	246	95	ENSG00000163635	ATXN7
bta-miR-13-7336	NM_000345	1619	1626	97	ENSG00000145335	SNCA
bta-miR-12-6501	NM_000345	1619	1626	97	ENSG00000145335	SNCA
bta-miR-200a	NM_000348	328	335	97	ENSG00000277893	SRD5A2
bta-miR-141	NM_000348	328	335	97	ENSG00000277893	SRD5A2
bta-miR-200a	NM_000353	719	726	97	ENSG00000198650	TAT
bta-miR-141	NM_000353	719	726	97	ENSG00000198650	TAT
bta-miR-186	NM_000384	268	275	99	ENSG00000084674	APOB
bta-miR-14-10137	NM_000396	467	474	98	ENSG00000143387	CTSK
bta-miR-3-34194	NM_000396	467	474	98	ENSG00000143387	CTSK
bta-miR-186	NM_000421	284	291	99	ENSG00000186395	KRT10
bta-miR-148a	NM_000451	1728	1735	98	ENSG00000185960	SHOX
bta-miR-186	NM_000452	58	64	96	ENSG00000125255	SLC10A2
bta-miR-3-34194	NM_000483	141	148	96	ENSG00000224916	APOC4-APOC2
bta-miR-14-10137	NM_000483	141	148	96	ENSG00000224916	APOC4-APOC2
bta-miR-2285e	NM_000489	3161	3168	97	ENSG00000085224	ATRX
bta-miR-2285c	NM_000489	3161	3168	97	ENSG00000085224	ATRX
bta-miR-186	NM_000508	69	76	97	ENSG00000171560	FGA
bta-miR-12-6501	NM_000534	57	64	99	ENSG00000064933	PMS1
bta-miR-2285c	NM_000534	56	62	96	ENSG00000064933	PMS1
bta-miR-2285e	NM_000534	56	62	96	ENSG00000064933	PMS1
bta-miR-13-7336	NM_000534	57	64	99	ENSG00000064933	PMS1
bta-miR-3-34194	NM_000538	1616	1622	97	ENSG00000133111	RFXAP
bta-miR-14-10137	NM_000538	1616	1622	97	ENSG00000133111	RFXAP
bta-miR-186	NM_000560	639	645	96	ENSG00000143119	CD53
bta-miR-141	NM_000565	3404	3410	96	ENSG00000160712	IL6R
bta-miR-200a	NM_000565	3404	3410	95	ENSG00000160712	IL6R
bta-miR-148a	NM_000585	306	313	99	ENSG00000164136	IL15
bta-miR-200a	NM_000601	168	175	99	ENSG00000019991	HGF
bta-miR-141	NM_000601	168	175	98	ENSG00000019991	HGF
bta-miR-141	NM_000609	2932	2939	96	ENSG00000107562	CXCL12
bta-miR-200a	NM_000609	2932	2939	96	ENSG00000107562	CXCL12
bta-miR-12-6501	NM_000614	95	102	96	ENSG00000242689	CNTF
bta-miR-186	NM_000637	503	510	96	ENSG00000104687	GSR
bta-miR-6522	NM_000642	1996	2003	97	ENSG00000162688	AGL
bta-miR-6522	NM_000643	1996	2003	97	ENSG00000162688	AGL
bta-miR-6522	NM_000644	1996	2003	97	ENSG00000162688	AGL
bta-miR-6522	NM_000645	1996	2003	97	ENSG00000283495
bta-miR-6522	NM_000646	1996	2003	97	ENSG00000162688	AGL
bta-miR-148a	NM_000655	291	298	98	ENSG00000188404	SELL
bta-miR-3-34194	NM_000671	1117	1123	95	ENSG00000197894	ADH5
bta-miR-14-10137	NM_000671	1117	1123	95	ENSG00000197894	ADH5
bta-miR-3-34194	NM_000705	304	311	99	ENSG00000186009	ATP4B
bta-miR-14-10137	NM_000705	304	311	99	ENSG00000186009	ATP4B
bta-miR-141	NM_000718	2272	2279	99	ENSG00000148408	CACNA1B
bta-miR-200a	NM_000718	2272	2279	99	ENSG00000148408	CACNA1B
bta-miR-186	NM_000739	473	479	95	ENSG00000181072	CHRM2
bta-miR-12-6501	NM_000765	392	398	96	ENSG00000160870	CYP3A7
bta-miR-13-7336	NM_000765	392	398	96	ENSG00000160870	CYP3A7
bta-miR-148a	NM_000788	1079	1086	97	ENSG00000156136	DCK
bta-miR-3-34194	NM_000801	1057	1063	97	ENSG00000088832	FKBP1A
bta-miR-14-10137	NM_000801	1057	1063	97	ENSG00000088832	FKBP1A
bta-miR-186	NM_000811	741	748	97	ENSG00000145863	GABRA6
bta-miR-12-6501	NM_000827	2580	2586	95	ENSG00000155511	GRIA1
bta-miR-13-7336	NM_000866	292	299	99	ENSG00000179097	HTR1F
bta-miR-12-6501	NM_000866	292	299	98	ENSG00000179097	HTR1F
bta-miR-2285c	NM_000885	26	33	98	ENSG00000115232	ITGA4
bta-miR-2285e	NM_000885	26	33	98	ENSG00000115232	ITGA4
bta-miR-12-6501	NM_000899	4278	4284	95	ENSG00000049130	KITLG
bta-miR-13-7336	NM_000899	4278	4284	95	ENSG00000049130	KITLG
bta-miR-186	NM_000912	3116	3123	99	ENSG00000082556	OPRK1
bta-miR-186	NM_000917	567	574	95	ENSG00000122884	P4HA1
bta-miR-186	NM_000943	393	399	95	ENSG00000168938	PPIC
bta-miR-186	NM_000958	991	998	97	ENSG00000171522	PTGER4
bta-miR-148a	NM_000963	1181	1188	97	ENSG00000073756	PTGS2
bta-miR-13-7336	NM_000997	124	131	99	ENSG00000145592	RPL37
bta-miR-12-6501	NM_000997	124	131	99	ENSG00000145592	RPL37
bta-miR-148a	NM_001001396	4469	4476	97	ENSG00000058668	ATP2B4
bta-miR-186	NM_001001483	347	354	99	ENSG00000177054	ZDHHC13
bta-miR-13-7336	NM_001001483	172	179	98	ENSG00000177054	ZDHHC13
bta-miR-12-6501	NM_001001483	172	179	98	ENSG00000177054	ZDHHC13
bta-miR-141	NM_001001521	112	119	96	ENSG00000169764	UGP2
bta-miR-200a	NM_001001521	112	119	96	ENSG00000169764	UGP2
bta-miR-200a	NM_001001549	2671	2677	96	ENSG00000106070	GRB10
bta-miR-148a	NM_001001549	2386	2393	95	ENSG00000106070	GRB10
bta-miR-141	NM_001001549	2671	2677	96	ENSG00000106070	GRB10
bta-miR-148a	NM_001001550	2386	2393	95	ENSG00000106070	GRB10
bta-miR-200a	NM_001001550	2671	2677	96	ENSG00000106070	GRB10
bta-miR-141	NM_001001550	2671	2677	96	ENSG00000106070	GRB10
bta-miR-141	NM_001001555	2671	2677	96	ENSG00000106070	GRB10
bta-miR-200a	NM_001001555	2671	2677	96	ENSG00000106070	GRB10
bta-miR-148a	NM_001001555	2386	2393	95	ENSG00000106070	GRB10
bta-miR-14-10137	NM_001001660	390	397	95	ENSG00000205707	LYRM5
bta-miR-3-34194	NM_001001660	390	397	95	ENSG00000205707	LYRM5
bta-miR-186	NM_001001740	264	270	98	ENSG00000143207	RFWD2
bta-miR-14-10137	NM_001001971	42	49	95	ENSG00000148541	FAM13C
bta-miR-3-34194	NM_001001971	42	49	95	ENSG00000148541	FAM13C
bta-miR-2285e	NM_001002006	150	157	95	ENSG00000185013	NT5C1B
bta-miR-2285e	NM_001002264	77	84	96	ENSG00000133106	EPSTI1
bta-miR-2285c	NM_001002264	77	84	96	ENSG00000133106	EPSTI1
bta-miR-14-10137	NM_001002800	148	155	99	ENSG00000113810	SMC4
bta-miR-3-34194	NM_001002800	148	155	99	ENSG00000113810	SMC4
bta-miR-2285c	NM_001002810	281	288	95	ENSG00000178104	PDE4DIP
bta-miR-2285e	NM_001002810	281	288	95	ENSG00000178104	PDE4DIP
bta-miR-12-6501	NM_001003688	391	398	95	ENSG00000170365	SMAD1
bta-miR-13-7336	NM_001003688	391	398	95	ENSG00000170365	SMAD1
bta-miR-12-6501	NM_001003841	1196	1203	97	ENSG00000174358	SLC6A19
bta-miR-13-7336	NM_001003841	1196	1203	96	ENSG00000174358	SLC6A19
bta-miR-141	NM_001004051	306	312	95	ENSG00000158301	GPRASP2
bta-miR-2285e	NM_001004127	90	97	98	ENSG00000253710	ALG11
bta-miR-2285c	NM_001004127	90	97	98	ENSG00000253710	ALG11
bta-miR-186	NM_001004313	256	262	95	ENSG00000187824	TMEM220
bta-miR-186	NM_001004313	307	314	95	ENSG00000187824	TMEM220
bta-miR-186	NM_001004342	5430	5436	95	ENSG00000119283	TRIM67
bta-miR-141	NM_001004360	2021	2027	95	ENSG00000175497	DPP10
bta-miR-200a	NM_001004360	2021	2027	95	ENSG00000175497	DPP10
bta-miR-200a	NM_001004439	1337	1343	97	ENSG00000137809	ITGA11
bta-miR-141	NM_001004439	1337	1343	97	ENSG00000137809	ITGA11
bta-miR-13-7336	NM_001005271	1109	1116	98	ENSG00000170004	CHD3
bta-miR-12-6501	NM_001005271	1109	1116	99	ENSG00000170004	CHD3
bta-miR-13-7336	NM_001005273	1109	1116	98	ENSG00000170004	CHD3
bta-miR-12-6501	NM_001005273	1109	1116	99	ENSG00000170004	CHD3
bta-miR-12-6501	NM_001005386	2308	2314	96	ENSG00000138071	ACTR2
bta-miR-2285c	NM_001005386	2307	2313	95	ENSG00000138071	ACTR2
bta-miR-2285e	NM_001005386	2307	2313	95	ENSG00000138071	ACTR2
bta-miR-2285c	NM_001005407	643	650	98	ENSG00000196557	CACNA1H
bta-miR-2285e	NM_001005407	643	650	98	ENSG00000196557	CACNA1H
bta-miR-186	NM_001005476	124	130	95	ENSG00000144283	PKP4
bta-miR-186	NM_001005498	730	737	99	ENSG00000129667	RHBDF2
bta-miR-141	NM_001005751	183	190	98	ENSG00000099290	FAM21A
bta-miR-200a	NM_001005751	183	190	98	ENSG00000099290	FAM21A
bta-miR-3-34194	NM_001006623	1771	1778	95	ENSG00000136709	WDR33
bta-miR-14-10137	NM_001006623	1771	1778	95	ENSG00000136709	WDR33
bta-miR-186	NM_001006626	473	479	95	ENSG00000181072	CHRM2
bta-miR-186	NM_001006627	473	479	95	ENSG00000181072	CHRM2
bta-miR-186	NM_001006628	473	479	95	ENSG00000181072	CHRM2
bta-miR-186	NM_001006629	473	479	95	ENSG00000181072	CHRM2
bta-miR-186	NM_001006630	473	479	95	ENSG00000181072	CHRM2
bta-miR-186	NM_001006631	473	479	95	ENSG00000181072	CHRM2
bta-miR-186	NM_001006632	473	479	95	ENSG00000181072	CHRM2
bta-miR-186	NM_001006944	165	171	95	ENSG00000162302	RPS6KA4
bta-miR-13-7336	NM_001007024	2739	2746	97	ENSG00000108587	GOSR1
bta-miR-12-6501	NM_001007024	2739	2746	98	ENSG00000108587	GOSR1
bta-miR-12-6501	NM_001007025	2739	2746	98	ENSG00000108587	GOSR1
bta-miR-13-7336	NM_001007025	2739	2746	97	ENSG00000108587	GOSR1
bta-miR-186	NM_001007245	175	181	96	ENSG00000006652	IFRD1
bta-miR-14-10137	NM_001007267	215	222	99	ENSG00000153246	PLA2R1
bta-miR-3-34194	NM_001007267	215	222	99	ENSG00000153246	PLA2R1
bta-miR-186	NM_001007559	1384	1391	96	ENSG00000141380	SS18
bta-miR-186	NM_001007794	122	128	96	ENSG00000134255	CEPT1
bta-miR-200a	NM_001008224	1518	1525	95	ENSG00000137831	UACA
bta-miR-13-7336	NM_001008388	2667	2674	96	ENSG00000145354	CISD2
bta-miR-12-6501	NM_001008388	2667	2674	96	ENSG00000145354	CISD2
bta-miR-14-10137	NM_001008536	433	440	97	ENSG00000182898	TCHHL1
bta-miR-3-34194	NM_001008536	433	440	97	ENSG00000182898	TCHHL1
bta-miR-200a	NM_001008783	761	768	98	ENSG00000182747	SLC35D3
bta-miR-141	NM_001008783	761	768	98	ENSG00000182747	SLC35D3
bta-miR-3-34194	NM_001008895	978	985	95	ENSG00000139842	CUL4A
bta-miR-14-10137	NM_001008895	978	985	95	ENSG00000139842	CUL4A
bta-miR-186	NM_001009881	353	360	97	ENSG00000134744	ZCCHC11
bta-miR-14-10137	NM_001009922	2685	2691	96	ENSG00000163743	RCHY1
bta-miR-3-34194	NM_001009922	2685	2691	96	ENSG00000163743	RCHY1
bta-miR-2285c	NM_001009958	518	525	99	ENSG00000197343	ZNF655
bta-miR-2285e	NM_001009958	518	525	99	ENSG00000197343	ZNF655
bta-miR-186	NM_001010895	510	517	98	ENSG00000182150	ERCC6L2
bta-miR-186	NM_001010923	1403	1409	96	ENSG00000275122	THEMIS
bta-miR-186	NM_001010923	1403	1409	96	ENSG00000172673	THEMIS
bta-miR-141	NM_001010932	168	175	98	ENSG00000019991	HGF
bta-miR-200a	NM_001010932	168	175	99	ENSG00000019991	HGF
bta-miR-13-7336	NM_001010942	893	900	95	ENSG00000127314	RAP1B
bta-miR-12-6501	NM_001010942	893	900	96	ENSG00000127314	RAP1B
bta-miR-200a	NM_001010977	43	50	98	ENSG00000139780	METTL21C
bta-miR-141	NM_001010977	43	50	97	ENSG00000139780	METTL21C
bta-miR-12-6501	NM_001011655	740	747	96	ENSG00000145014	TMEM44
bta-miR-13-7336	NM_001011655	740	747	96	ENSG00000145014	TMEM44
bta-miR-200a	NM_001012361	139	146	97	ENSG00000148225	WDR31
bta-miR-141	NM_001012361	139	146	97	ENSG00000148225	WDR31
bta-miR-12-6501	NM_001012980	103	110	97	ENSG00000184788	SATL1
bta-miR-13-7336	NM_001012980	103	110	97	ENSG00000184788	SATL1
bta-miR-148a	NM_001013438	582	589	95	ENSG00000114416	FXR1
bta-miR-148a	NM_001013439	428	435	97	ENSG00000114416	FXR1
bta-miR-12-6501	NM_001013620	286	293	98	ENSG00000175548	ALG10B
bta-miR-13-7336	NM_001013620	286	293	98	ENSG00000175548	ALG10B
bta-miR-186	NM_001013649	3273	3279	96	ENSG00000168887	C2orf68
bta-miR-13-7336	NM_001014380	78	84	95	ENSG00000102781	KATNAL1
bta-miR-148a	NM_001014435	619	626	98	ENSG00000168748	CA7
bta-miR-14-10137	NM_001014990	1131	1138	98	ENSG00000082515	MRPL22
bta-miR-3-34194	NM_001014990	1131	1138	98	ENSG00000082515	MRPL22
bta-miR-14-10137	NM_001017369	641	647	96	ENSG00000052802	MSMO1
bta-miR-2285e	NM_001017369	572	579	99	ENSG00000052802	MSMO1
bta-miR-2285c	NM_001017369	572	579	99	ENSG00000052802	MSMO1
bta-miR-3-34194	NM_001017369	641	647	96	ENSG00000052802	MSMO1
bta-miR-186	NM_001017372	57	64	96	ENSG00000113396	SLC27A6
bta-miR-186	NM_001017373	160	167	98	ENSG00000164483	SAMD3
bta-miR-186	NM_001017420	1106	1112	96	ENSG00000171320	ESCO2
bta-miR-2285c	NM_001017520	37	44	99	ENSG00000107447	DNTT
bta-miR-2285e	NM_001017520	37	44	99	ENSG00000107447	DNTT
bta-miR-186	NM_001017923	1537	1543	95	ENSG00000179476	C14orf28
bta-miR-186	NM_001017962	567	574	95	ENSG00000122884	P4HA1
bta-miR-141	NM_001017970	2120	2127	96	ENSG00000182107	TMEM30B
bta-miR-200a	NM_001017970	2120	2127	95	ENSG00000182107	TMEM30B
bta-miR-200a	NM_001023560	655	662	96	ENSG00000197062	ZSCAN26
bta-miR-141	NM_001023560	655	662	96	ENSG00000197062	ZSCAN26
bta-miR-13-7336	NM_001023570	360	367	99	ENSG00000173226	IQCB1
bta-miR-12-6501	NM_001023570	360	367	99	ENSG00000173226	IQCB1
bta-miR-12-6501	NM_001023571	360	367	99	ENSG00000173226	IQCB1
bta-miR-13-7336	NM_001023571	360	367	99	ENSG00000173226	IQCB1
bta-miR-13-7336	NM_001024660	1500	1507	99	ENSG00000160145	KALRN
bta-miR-12-6501	NM_001024660	1500	1507	99	ENSG00000160145	KALRN
bta-miR-186	NM_001024847	2152	2158	95	ENSG00000163513	TGFBR2
bta-miR-186	NM_001025105	1225	1232	95	ENSG00000113712	CSNK1A1
bta-miR-3-34194	NM_001025266	4147	4153	95	ENSG00000187068	C3orf70
bta-miR-14-10137	NM_001025266	4147	4153	95	ENSG00000187068	C3orf70
bta-miR-186	NM_001025356	2816	2822	98	ENSG00000177119	ANO6
bta-miR-186	NM_001025366	431	437	98	ENSG00000112715	VEGFA
bta-miR-186	NM_001025367	431	437	98	ENSG00000112715	VEGFA
bta-miR-186	NM_001025368	431	437	98	ENSG00000112715	VEGFA
bta-miR-186	NM_001025369	447	453	98	ENSG00000112715	VEGFA
bta-miR-186	NM_001025370	431	437	98	ENSG00000112715	VEGFA
bta-miR-148a	NM_001025593	292	299	96	ENSG00000164144	ARFIP1
bta-miR-148a	NM_001025595	292	299	96	ENSG00000164144	ARFIP1
bta-miR-186	NM_001025780	390	396	95	ENSG00000107362	ABHD17B
bta-miR-200a	NM_001029860	247	254	99	ENSG00000156509	FBXO43
bta-miR-141	NM_001029860	247	254	99	ENSG00000156509	FBXO43
bta-miR-148a	NM_001029882	366	373	95	ENSG00000126705	AHDC1
bta-miR-14-10137	NM_001029888	68	74	95	ENSG00000203795	FAM24A
bta-miR-3-34194	NM_001029888	68	74	95	ENSG00000203795	FAM24A
bta-miR-148a	NM_001031689	155	162	98	ENSG00000137055	PLAA
bta-miR-148a	NM_001031692	456	463	99	ENSG00000128606	LRRC17
bta-miR-186	NM_001031712	131	137	96	ENSG00000066651	TRMT11
bta-miR-13-7336	NM_001031739	79	86	99	ENSG00000102048	ASB9
bta-miR-12-6501	NM_001031739	79	86	99	ENSG00000102048	ASB9
bta-miR-2285c	NM_001031812	2230	2237	97	ENSG00000151292	CSNK1G3
bta-miR-2285e	NM_001031812	2230	2237	97	ENSG00000151292	CSNK1G3
bta-miR-3-34194	NM_001032396	326	333	96	ENSG00000181191	PJA1
bta-miR-14-10137	NM_001032396	326	333	96	ENSG00000181191	PJA1
bta-miR-14-10137	NM_001032730	535	542	99	ENSG00000090686	USP48
bta-miR-3-34194	NM_001032730	535	542	99	ENSG00000090686	USP48
bta-miR-186	NM_001033047	2617	2623	98	ENSG00000168743	NPNT
bta-miR-14-10137	NM_001033081	38	45	95	ENSG00000116990	MYCL
bta-miR-3-34194	NM_001033081	38	45	95	ENSG00000116990	MYCL
bta-miR-3-34194	NM_001033082	38	45	95	ENSG00000116990	MYCL
bta-miR-14-10137	NM_001033082	38	45	95	ENSG00000116990	MYCL
bta-miR-148a	NM_001033575	43	50	96	ENSG00000188542	DUSP28
bta-miR-2285c	NM_001033602	325	332	97	ENSG00000132938	MTUS2
bta-miR-2285e	NM_001033602	325	332	97	ENSG00000132938	MTUS2
bta-miR-186	NM_001033719	142	149	99	ENSG00000176222	ZNF404
bta-miR-186	NM_001033756	365	371	99	ENSG00000112715	VEGFA
bta-miR-141	NM_001034853	133	140	97	ENSG00000156313	RPGR
bta-miR-200a	NM_001034853	133	140	97	ENSG00000156313	RPGR
bta-miR-186	NM_001035	519	526	97	ENSG00000198626	RYR2
bta-miR-200a	NM_001037293	7284	7291	99	ENSG00000243444	PALM2
bta-miR-141	NM_001037293	7284	7291	98	ENSG00000243444	PALM2
bta-miR-14-10137	NM_001039091	309	316	97	ENSG00000101911	PRPS2
bta-miR-3-34194	NM_001039091	309	316	97	ENSG00000101911	PRPS2
bta-miR-14-10137	NM_001039210	212	219	99	ENSG00000101901	ALG13
bta-miR-3-34194	NM_001039210	212	219	99	ENSG00000101901	ALG13
bta-miR-3-34194	NM_001039210	85	92	99	ENSG00000101901	ALG13
bta-miR-14-10137	NM_001039210	85	92	99	ENSG00000101901	ALG13
bta-miR-3-34194	NM_001039697	673	680	95	ENSG00000164975	SNAPC3
bta-miR-14-10137	NM_001039697	673	680	95	ENSG00000164975	SNAPC3
bta-miR-186	NM_001039752	679	685	98	ENSG00000184999	SLC22A10
bta-miR-14-10137	NM_001039802	1263	1269	97	ENSG00000070831	CDC42
bta-miR-3-34194	NM_001039802	1263	1269	97	ENSG00000070831	CDC42
bta-miR-186	NM_001039840	99	106	99	ENSG00000204116	CHIC1
bta-miR-13-7336	NM_001040006	60	66	95	ENSG00000113649	TCERG1
bta-miR-141	NM_001040006	307	314	95	ENSG00000113649	TCERG1
bta-miR-186	NM_001040033	639	645	96	ENSG00000143119	CD53
bta-miR-3-34194	NM_001040100	983	989	95	ENSG00000196542	SPTSSB
bta-miR-14-10137	NM_001040100	983	989	95	ENSG00000196542	SPTSSB
bta-miR-148a	NM_001040113	664	671	99	ENSG00000133392	MYH11
bta-miR-148a	NM_001040113	664	671	99	ENSG00000276480	MYH11
bta-miR-148a	NM_001040114	523	530	99	ENSG00000133392	MYH11
bta-miR-148a	NM_001040114	523	530	99	ENSG00000276480	MYH11
bta-miR-148a	NM_001040172	77	84	99	ENSG00000164270	HTR4
bta-miR-200a	NM_001040429	3287	3294	96	ENSG00000118946	PCDH17
bta-miR-141	NM_001040429	3287	3294	96	ENSG00000118946	PCDH17
bta-miR-186	NM_001040441	3211	3218	98	ENSG00000160062	ZBTB8A
bta-miR-200a	NM_001040712	3682	3689	99	ENSG00000153707	PTPRD
bta-miR-141	NM_001040712	3682	3689	99	ENSG00000153707	PTPRD
bta-miR-13-7336	NM_001040876	77	83	95	ENSG00000164163	ABCE1
bta-miR-2285c	NM_001040876	76	82	96	ENSG00000164163	ABCE1
bta-miR-2285e	NM_001040876	76	82	96	ENSG00000164163	ABCE1
bta-miR-12-6501	NM_001040876	77	83	96	ENSG00000164163	ABCE1
bta-miR-186	NM_001042355	4640	4647	97	ENSG00000083799	CYLD
bta-miR-186	NM_001042412	4640	4647	97	ENSG00000083799	CYLD
bta-miR-186	NM_001042426	685	692	99	ENSG00000115163	CENPA
bta-miR-200a	NM_001042437	868	875	96	ENSG00000115525	ST3GAL5
bta-miR-141	NM_001042437	868	875	95	ENSG00000115525	ST3GAL5
bta-miR-186	NM_001042490	61	68	98	ENSG00000274675	GTF2H2C_2
bta-miR-141	NM_001042550	161	168	99	ENSG00000136824	SMC2
bta-miR-200a	NM_001042550	161	168	98	ENSG00000136824	SMC2
bta-miR-141	NM_001042551	161	168	99	ENSG00000136824	SMC2
bta-miR-200a	NM_001042551	161	168	98	ENSG00000136824	SMC2
bta-miR-13-7336	NM_001042552	605	612	96	ENSG00000203705	TATDN3
bta-miR-12-6501	NM_001042552	605	612	96	ENSG00000203705	TATDN3
bta-miR-12-6501	NM_001042553	605	612	96	ENSG00000203705	TATDN3
bta-miR-13-7336	NM_001042553	605	612	96	ENSG00000203705	TATDN3
bta-miR-6522	NM_001042616	386	393	98	ENSG00000255072	PIGY
bta-miR-186	NM_001042706	940	947	99	ENSG00000214216	IQCJ
bta-miR-186	NM_001042734	331	337	97	ENSG00000138802	SEC24B
bta-miR-12-6501	NM_001043351	1986	1992	96	ENSG00000143549	TPM3
bta-miR-13-7336	NM_001043351	1986	1992	96	ENSG00000143549	TPM3
bta-miR-2285c	NM_001043351	1985	1991	95	ENSG00000143549	TPM3
bta-miR-2285e	NM_001043351	1985	1991	95	ENSG00000143549	TPM3
bta-miR-13-7336	NM_001043352	3346	3352	96	ENSG00000143549	TPM3
bta-miR-12-6501	NM_001043352	3346	3352	96	ENSG00000143549	TPM3
bta-miR-2285e	NM_001043352	3345	3351	95	ENSG00000143549	TPM3
bta-miR-2285c	NM_001043352	3345	3351	95	ENSG00000143549	TPM3
bta-miR-2285c	NM_001043353	3345	3351	95	ENSG00000143549	TPM3
bta-miR-2285e	NM_001043353	3345	3351	95	ENSG00000143549	TPM3
bta-miR-13-7336	NM_001043353	3346	3352	96	ENSG00000143549	TPM3
bta-miR-12-6501	NM_001043353	3346	3352	96	ENSG00000143549	TPM3
bta-miR-14-10137	NM_001044385	347	354	98	ENSG00000155755	TMEM237
bta-miR-3-34194	NM_001044385	347	354	98	ENSG00000155755	TMEM237
bta-miR-2285e	NM_001044723	2230	2237	97	ENSG00000151292	CSNK1G3
bta-miR-2285c	NM_001044723	2230	2237	97	ENSG00000151292	CSNK1G3
bta-miR-2285e	NM_001075098	2439	2446	96	ENSG00000124615	MOCS1
bta-miR-2285c	NM_001075098	2439	2446	96	ENSG00000124615	MOCS1
bta-miR-186	NM_001076674	616	622	95	ENSG00000168591	TMUB2
bta-miR-6522	NM_001076786	518	525	96	ENSG00000060749	QSER1
bta-miR-3-34194	NM_001077181	121	128	97	ENSG00000081377	CDC14B
bta-miR-14-10137	NM_001077181	121	128	97	ENSG00000081377	CDC14B
bta-miR-13-7336	NM_001077654	465	472	95	ENSG00000145779	TNFAIP8
bta-miR-200a	NM_001077663	137	144	95	ENSG00000106608	URGCP
bta-miR-141	NM_001077663	137	144	95	ENSG00000106608	URGCP
bta-miR-141	NM_001077664	137	144	95	ENSG00000106608	URGCP
bta-miR-200a	NM_001077664	137	144	95	ENSG00000106608	URGCP
bta-miR-13-7336	NM_001077700	3272	3279	97	ENSG00000198160	MIER1
bta-miR-12-6501	NM_001077700	3272	3279	96	ENSG00000198160	MIER1
bta-miR-12-6501	NM_001077701	3272	3279	96	ENSG00000198160	MIER1
bta-miR-13-7336	NM_001077701	3272	3279	97	ENSG00000198160	MIER1
bta-miR-148a	NM_001077702	58	65	98	ENSG00000198160	MIER1
bta-miR-141	NM_001077702	164	171	97	ENSG00000198160	MIER1
bta-miR-12-6501	NM_001077702	1791	1798	96	ENSG00000198160	MIER1
bta-miR-13-7336	NM_001077702	1791	1798	97	ENSG00000198160	MIER1
bta-miR-200a	NM_001077702	164	171	97	ENSG00000198160	MIER1
bta-miR-141	NM_001077703	164	171	97	ENSG00000198160	MIER1
bta-miR-12-6501	NM_001077703	1791	1798	96	ENSG00000198160	MIER1
bta-miR-148a	NM_001077703	58	65	98	ENSG00000198160	MIER1
bta-miR-200a	NM_001077703	164	171	97	ENSG00000198160	MIER1
bta-miR-13-7336	NM_001077703	1791	1798	97	ENSG00000198160	MIER1
bta-miR-200a	NM_001077704	164	171	97	ENSG00000198160	MIER1
bta-miR-13-7336	NM_001077704	1791	1798	97	ENSG00000198160	MIER1
bta-miR-12-6501	NM_001077704	1791	1798	96	ENSG00000198160	MIER1
bta-miR-141	NM_001077704	164	171	97	ENSG00000198160	MIER1
bta-miR-148a	NM_001077704	58	65	98	ENSG00000198160	MIER1
bta-miR-141	NM_001079528	334	341	97	ENSG00000275331	ABCC6
bta-miR-141	NM_001079528	334	341	97	ENSG00000091262	ABCC6
bta-miR-200a	NM_001079528	334	341	97	ENSG00000275331	ABCC6
bta-miR-200a	NM_001079528	334	341	97	ENSG00000091262	ABCC6
bta-miR-186	NM_001079668	861	867	96	ENSG00000136352	NKX2-1
bta-miR-186	NM_001079673	2188	2194	96	ENSG00000102531	FNDC3A
bta-miR-186	NM_001079911	708	714	95	ENSG00000152592	DMP1
bta-miR-141	NM_001080416	537	544	97	ENSG00000185697	MYBL1
bta-miR-200a	NM_001080416	537	544	97	ENSG00000185697	MYBL1
bta-miR-186	NM_001080425	185	191	97	ENSG00000102409	BEX4
bta-miR-186	NM_001080427	876	882	97	ENSG00000144229	THSD7B
bta-miR-200a	NM_001080432	212	219	97	ENSG00000140718	FTO
bta-miR-141	NM_001080432	212	219	97	ENSG00000140718	FTO
bta-miR-186	NM_001080460	123	129	95	ENSG00000188306	LRRIQ4
bta-miR-200a	NM_001080465	64	71	99	ENSG00000276913	C17orf98
bta-miR-200a	NM_001080465	64	71	99	ENSG00000275489	C17orf98
bta-miR-141	NM_001080465	64	71	99	ENSG00000276913	C17orf98
bta-miR-141	NM_001080465	64	71	99	ENSG00000275489	C17orf98
bta-miR-13-7336	NM_001080479	123	130	98	ENSG00000214944	ARHGEF28
bta-miR-12-6501	NM_001080479	123	130	98	ENSG00000214944	ARHGEF28
bta-miR-200a	NM_001080481	46	53	98	ENSG00000123552	USP45
bta-miR-141	NM_001080481	46	53	98	ENSG00000123552	USP45
bta-miR-148a	NM_001081560	640	647	95	ENSG00000104936	DMPK
bta-miR-148a	NM_001081562	633	640	95	ENSG00000104936	DMPK
bta-miR-148a	NM_001081563	640	647	95	ENSG00000104936	DMPK
bta-miR-200a	NM_001083602	2573	2580	95	ENSG00000185920	PTCH1
bta-miR-200a	NM_001083603	2573	2580	95	ENSG00000185920	PTCH1
bta-miR-200a	NM_001083604	2573	2580	95	ENSG00000185920	PTCH1
bta-miR-200a	NM_001083605	2573	2580	95	ENSG00000185920	PTCH1
bta-miR-200a	NM_001083606	2573	2580	95	ENSG00000185920	PTCH1
bta-miR-200a	NM_001083607	2573	2580	95	ENSG00000185920	PTCH1
bta-miR-14-10137	NM_001085347	431	437	96	ENSG00000160404	TOR2A
bta-miR-3-34194	NM_001085347	431	437	96	ENSG00000160404	TOR2A
bta-miR-2285c	NM_001085366	518	525	99	ENSG00000197343	ZNF655
bta-miR-2285e	NM_001085366	518	525	99	ENSG00000197343	ZNF655
bta-miR-2285e	NM_001085367	518	525	99	ENSG00000197343	ZNF655
bta-miR-2285c	NM_001085367	518	525	99	ENSG00000197343	ZNF655
bta-miR-12-6501	NM_001085411	1574	1581	95	ENSG00000152620	NADK2
bta-miR-13-7336	NM_001085411	1574	1581	95	ENSG00000152620	NADK2
bta-miR-14-10137	NM_001085447	280	286	95	ENSG00000154479	CCDC173
bta-miR-3-34194	NM_001085447	280	286	95	ENSG00000154479	CCDC173
bta-miR-14-10137	NM_001085455	817	823	95	ENSG00000188694	KRTAP24-1
bta-miR-3-34194	NM_001085455	817	823	95	ENSG00000188694	KRTAP24-1
bta-miR-186	NM_001085471	94	100	96	ENSG00000053254	FOXN3
bta-miR-186	NM_001085474	99	106	98	ENSG00000259823	LYPD8
bta-miR-141	NM_001085476	582	589	98	ENSG00000273514	FOXD4L6
bta-miR-200a	NM_001085476	582	589	97	ENSG00000273514	FOXD4L6
bta-miR-200a	NM_001085487	4387	4393	95	ENSG00000162601	MYSM1
bta-miR-13-7336	NM_001093772	1997	2004	97	ENSG00000157404	KIT
bta-miR-12-6501	NM_001093772	1997	2004	97	ENSG00000157404	KIT
bta-miR-200a	NM_001098204	138	144	95	ENSG00000169813	HNRNPF
bta-miR-200a	NM_001098205	138	144	95	ENSG00000169813	HNRNPF
bta-miR-200a	NM_001098206	138	144	95	ENSG00000169813	HNRNPF
bta-miR-200a	NM_001098207	138	144	95	ENSG00000169813	HNRNPF
bta-miR-200a	NM_001098208	138	144	95	ENSG00000169813	HNRNPF
bta-miR-148a	NM_001098515	801	808	99	ENSG00000172935	MRGPRF
bta-miR-148a	NM_001098518	937	944	96	ENSG00000069122	ADGRF5
bta-miR-186	NM_001098525	855	861	96	ENSG00000136108	CKAP2
bta-miR-12-6501	NM_001098576	1819	1825	95	ENSG00000139644	TMBIM6
bta-miR-14-10137	NM_001098721	312	319	98	ENSG00000168243	GNG4
bta-miR-3-34194	NM_001098721	312	319	98	ENSG00000168243	GNG4
bta-miR-3-34194	NM_001098722	312	319	98	ENSG00000168243	GNG4
bta-miR-14-10137	NM_001098722	312	319	98	ENSG00000168243	GNG4
bta-miR-186	NM_001098728	61	68	98	ENSG00000183474	GTF2H2C
bta-miR-186	NM_001098728	61	68	98	ENSG00000275045	GTF2H2
bta-miR-141	NM_001098786	87	94	96	ENSG00000135245	HILPDA
bta-miR-200a	NM_001098786	87	94	96	ENSG00000135245	HILPDA
bta-miR-2285c	NM_001099642	327	334	95	ENSG00000282945	CMTR2
bta-miR-2285c	NM_001099642	327	334	95	ENSG00000180917	CMTR2
bta-miR-186	NM_001099642	1111	1117	98	ENSG00000282945	CMTR2
bta-miR-186	NM_001099642	1111	1117	98	ENSG00000180917	CMTR2
bta-miR-2285e	NM_001099642	327	334	95	ENSG00000282945	CMTR2
bta-miR-2285e	NM_001099642	327	334	95	ENSG00000180917	CMTR2
bta-miR-148a	NM_001099677	538	545	96	ENSG00000250305	KIAA1456
bta-miR-148a	NM_001099691	3374	3381	99	ENSG00000163235	TGFA
bta-miR-2285e	NM_001099855	109	116	99	ENSG00000101977	MCF2
bta-miR-2285e	NM_001099855	802	808	96	ENSG00000101977	MCF2
bta-miR-2285c	NM_001099855	802	808	96	ENSG00000101977	MCF2
bta-miR-2285c	NM_001099855	109	116	99	ENSG00000101977	MCF2
bta-miR-2285e	NM_001100409	2338	2344	95	ENSG00000112701	SENP6
bta-miR-13-7336	NM_001100409	2339	2346	99	ENSG00000112701	SENP6
bta-miR-2285c	NM_001100409	2338	2344	95	ENSG00000112701	SENP6
bta-miR-12-6501	NM_001100409	2339	2346	99	ENSG00000112701	SENP6
bta-miR-186	NM_001100818	1616	1623	99	ENSG00000153823	PID1
bta-miR-2285e	NM_001100829	262	269	96	ENSG00000205269	TMEM170B
bta-miR-2285c	NM_001100829	262	269	96	ENSG00000205269	TMEM170B
bta-miR-186	NM_001100874	81	88	96	ENSG00000164037	SLC9B1
bta-miR-200a	NM_001101669	570	577	99	ENSG00000109452	INPP4B
bta-miR-141	NM_001101669	570	577	98	ENSG00000109452	INPP4B
bta-miR-186	NM_001102406	330	337	97	ENSG00000073331	ALPK1
bta-miR-186	NM_001102653	3570	3577	98	ENSG00000164164	OTUD4
bta-miR-141	NM_001102659	660	667	99	ENSG00000235118
bta-miR-200a	NM_001102659	660	667	99	ENSG00000235118
bta-miR-186	NM_001104558	2061	2068	96	ENSG00000164181	ELOVL7
bta-miR-186	NM_001104587	1738	1745	99	ENSG00000172716	SLFN11
bta-miR-186	NM_001104588	1738	1745	99	ENSG00000172716	SLFN11
bta-miR-186	NM_001104589	1738	1745	99	ENSG00000172716	SLFN11
bta-miR-186	NM_001104590	1738	1745	99	ENSG00000172716	SLFN11
bta-miR-141	NM_001105529	4547	4554	97	ENSG00000124406	ATP8A1
bta-miR-200a	NM_001105529	4547	4554	97	ENSG00000124406	ATP8A1
bta-miR-14-10137	NM_001105529	4284	4291	97	ENSG00000124406	ATP8A1
bta-miR-3-34194	NM_001105529	4284	4291	97	ENSG00000124406	ATP8A1
bta-miR-186	NM_001105539	2724	2730	96	ENSG00000205189	ZBTB10
bta-miR-141	NM_001105570	618	624	97	ENSG00000213965	NUDT19
bta-miR-186	NM_001105570	148	155	98	ENSG00000213965	NUDT19
bta-miR-200a	NM_001105570	618	624	96	ENSG00000213965	NUDT19
bta-miR-186	NM_001105573	3849	3855	97	ENSG00000174013	FBXO45
bta-miR-14-10137	NM_001106	9451	9457	97	ENSG00000114739	ACVR2B
bta-miR-3-34194	NM_001106	9451	9457	97	ENSG00000114739	ACVR2B
bta-miR-14-10137	NM_001109	422	428	96	ENSG00000151651	ADAM8
bta-miR-3-34194	NM_001109	422	428	96	ENSG00000151651	ADAM8
bta-miR-141	NM_001110798	127	134	99	ENSG00000172766	NAA16
bta-miR-200a	NM_001110798	127	134	99	ENSG00000172766	NAA16
bta-miR-200a	NM_001111039	655	662	96	ENSG00000197062	ZSCAN26
bta-miR-141	NM_001111039	655	662	96	ENSG00000197062	ZSCAN26
bta-miR-186	NM_001112732	1389	1396	99	ENSG00000126217	MCF2L
bta-miR-13-7336	NM_001113402	922	929	95	ENSG00000151743	AMN1
bta-miR-12-6501	NM_001113402	922	929	97	ENSG00000151743	AMN1
bta-miR-186	NM_001113475	174	181	96	ENSG00000165555	NOXRED1
bta-miR-186	NM_001114182	81	88	98	ENSG00000198001	IRAK4
bta-miR-12-6501	NM_001114183	2580	2586	95	ENSG00000155511	GRIA1
bta-miR-141	NM_001114634	5292	5299	97	ENSG00000181690	PLAG1
bta-miR-200a	NM_001114634	5292	5299	97	ENSG00000181690	PLAG1
bta-miR-200a	NM_001114635	5292	5299	97	ENSG00000181690	PLAG1
bta-miR-141	NM_001114635	5292	5299	97	ENSG00000181690	PLAG1
bta-miR-186	NM_001119	1251	1258	99	ENSG00000087274	ADD1
bta-miR-12-6501	NM_001122608	1284	1290	96	ENSG00000004961	HCCS
bta-miR-13-7336	NM_001122608	1284	1290	96	ENSG00000004961	HCCS
bta-miR-186	NM_001122659	226	233	97	ENSG00000136160	EDNRB
bta-miR-186	NM_001122659	2315	2322	97	ENSG00000136160	EDNRB
bta-miR-12-6501	NM_001122769	623	629	95	ENSG00000135338	LCA5
bta-miR-2285c	NM_001122779	623	630	99	ENSG00000124019	FAM124B
bta-miR-2285e	NM_001122779	623	630	99	ENSG00000124019	FAM124B
bta-miR-3-34194	NM_001126103	111	118	99	ENSG00000161800	RACGAP1
bta-miR-14-10137	NM_001126103	111	118	99	ENSG00000161800	RACGAP1
bta-miR-3-34194	NM_001126104	111	118	99	ENSG00000161800	RACGAP1
bta-miR-14-10137	NM_001126104	111	118	99	ENSG00000161800	RACGAP1
bta-miR-2285e	NM_001127182	250	257	98	ENSG00000138180	CEP55
bta-miR-2285c	NM_001127182	250	257	98	ENSG00000138180	CEP55
bta-miR-186	NM_001127202	301	308	95	ENSG00000126226	PCID2
bta-miR-186	NM_001127203	192	199	95	ENSG00000126226	PCID2
bta-miR-148a	NM_001127320	46	53	98	ENSG00000143569	UBAP2L
bta-miR-3-34194	NM_001127357	2333	2340	98	ENSG00000006576	PHTF2
bta-miR-14-10137	NM_001127357	2333	2340	98	ENSG00000006576	PHTF2
bta-miR-3-34194	NM_001127358	2333	2340	98	ENSG00000006576	PHTF2
bta-miR-14-10137	NM_001127358	2333	2340	98	ENSG00000006576	PHTF2
bta-miR-3-34194	NM_001127395	94	101	96	ENSG00000144401	METTL21A
bta-miR-14-10137	NM_001127395	94	101	96	ENSG00000144401	METTL21A
bta-miR-14-10137	NM_001127510	1955	1961	96	ENSG00000134982	APC
bta-miR-3-34194	NM_001127510	1955	1961	96	ENSG00000134982	APC
bta-miR-3-34194	NM_001127511	1955	1961	96	ENSG00000134982	APC
bta-miR-14-10137	NM_001127511	1955	1961	96	ENSG00000134982	APC
bta-miR-13-7336	NM_001127671	6143	6150	96	ENSG00000113594	LIFR
bta-miR-12-6501	NM_001127671	6143	6150	97	ENSG00000113594	LIFR
bta-miR-186	NM_001127688	185	191	97	ENSG00000102409	BEX4
bta-miR-148a	NM_001127695	237	244	97	ENSG00000064601	CTSA
bta-miR-186	NM_001127713	665	671	97	ENSG00000198513	ATL1
bta-miR-148a	NM_001127714	355	362	95	ENSG00000127124	HIVEP3
bta-miR-13-7336	NM_001128128	218	224	95	ENSG00000148516	ZEB1
bta-miR-2285e	NM_001128143	56	62	96	ENSG00000064933	PMS1
bta-miR-2285c	NM_001128143	56	62	96	ENSG00000064933	PMS1
bta-miR-13-7336	NM_001128143	57	64	99	ENSG00000064933	PMS1
bta-miR-12-6501	NM_001128143	57	64	99	ENSG00000064933	PMS1
bta-miR-12-6501	NM_001128144	57	64	99	ENSG00000064933	PMS1
bta-miR-2285c	NM_001128144	56	62	96	ENSG00000064933	PMS1
bta-miR-13-7336	NM_001128144	57	64	99	ENSG00000064933	PMS1
bta-miR-2285e	NM_001128144	56	62	96	ENSG00000064933	PMS1
bta-miR-200a	NM_001128149	239	246	95	ENSG00000163635	ATXN7
bta-miR-141	NM_001128149	239	246	95	ENSG00000163635	ATXN7
bta-miR-3-34194	NM_001128150	412	419	98	ENSG00000128699	ORMDL1
bta-miR-14-10137	NM_001128150	412	419	98	ENSG00000128699	ORMDL1
bta-miR-3-34194	NM_001128164	7119	7126	99	ENSG00000124788	ATXN1
bta-miR-14-10137	NM_001128164	7119	7126	99	ENSG00000124788	ATXN1
bta-miR-2285c	NM_001128595	2421	2428	98	ENSG00000276776	TC2N
bta-miR-2285c	NM_001128595	2421	2428	98	ENSG00000165929	TC2N
bta-miR-2285e	NM_001128595	2421	2428	98	ENSG00000276776	TC2N
bta-miR-2285e	NM_001128595	2421	2428	98	ENSG00000165929	TC2N
bta-miR-2285e	NM_001128596	2421	2428	98	ENSG00000276776	TC2N
bta-miR-2285e	NM_001128596	2421	2428	98	ENSG00000165929	TC2N
bta-miR-2285c	NM_001128596	2421	2428	98	ENSG00000276776	TC2N
bta-miR-2285c	NM_001128596	2421	2428	98	ENSG00000165929	TC2N
bta-miR-3-34194	NM_001128610	233	239	95	ENSG00000138592	USP8
bta-miR-14-10137	NM_001128610	233	239	95	ENSG00000138592	USP8
bta-miR-3-34194	NM_001128615	1586	1593	99	ENSG00000163947	ARHGEF3
bta-miR-14-10137	NM_001128615	1586	1593	99	ENSG00000163947	ARHGEF3
bta-miR-14-10137	NM_001128616	1586	1593	99	ENSG00000163947	ARHGEF3
bta-miR-3-34194	NM_001128616	1586	1593	99	ENSG00000163947	ARHGEF3
bta-miR-13-7336	NM_001128918	452	459	98	ENSG00000075413	MARK3
bta-miR-12-6501	NM_001128918	452	459	98	ENSG00000075413	MARK3
bta-miR-12-6501	NM_001128919	452	459	98	ENSG00000075413	MARK3
bta-miR-13-7336	NM_001128919	452	459	98	ENSG00000075413	MARK3
bta-miR-13-7336	NM_001128920	452	459	98	ENSG00000075413	MARK3
bta-miR-12-6501	NM_001128920	452	459	98	ENSG00000075413	MARK3
bta-miR-13-7336	NM_001128921	452	459	98	ENSG00000075413	MARK3
bta-miR-12-6501	NM_001128921	452	459	98	ENSG00000075413	MARK3
bta-miR-186	NM_001128928	187	194	95	ENSG00000151689	INPP1
bta-miR-12-6501	NM_001128930	489	496	97	ENSG00000197217	ENTPD4
bta-miR-13-7336	NM_001128930	489	496	98	ENSG00000197217	ENTPD4
bta-miR-200a	NM_001128933	299	306	96	ENSG00000172403	SYNPO2
bta-miR-141	NM_001128933	299	306	96	ENSG00000172403	SYNPO2
bta-miR-141	NM_001129993	578	585	95	ENSG00000162929	KIAA1841
bta-miR-200a	NM_001129993	578	585	95	ENSG00000162929	KIAA1841
bta-miR-148a	NM_001129993	385	392	95	ENSG00000162929	KIAA1841
bta-miR-3-34194	NM_001130026	1714	1721	98	ENSG00000170379	TCAF2
bta-miR-14-10137	NM_001130026	1714	1721	98	ENSG00000170379	TCAF2
bta-miR-148a	NM_001130037	79	86	96	ENSG00000110675	ELMOD1
bta-miR-6522	NM_001130049	129	136	97	ENSG00000088387	DOCK9
bta-miR-6522	NM_001130050	129	136	97	ENSG00000088387	DOCK9
bta-miR-186	NM_001130145	3215	3222	97	ENSG00000137693	YAP1
bta-miR-186	NM_001130145	3378	3384	98	ENSG00000137693	YAP1
bta-miR-2285c	NM_001130182	1544	1551	97	ENSG00000140403	DNAJA4
bta-miR-2285e	NM_001130182	1544	1551	97	ENSG00000140403	DNAJA4
bta-miR-2285c	NM_001130183	1544	1551	97	ENSG00000140403	DNAJA4
bta-miR-2285e	NM_001130183	1544	1551	97	ENSG00000140403	DNAJA4
bta-miR-186	NM_001130445	992	999	98	ENSG00000138434	SSFA2
bta-miR-141	NM_001130528	184	191	97	ENSG00000008294	SPAG9
bta-miR-200a	NM_001130528	184	191	96	ENSG00000008294	SPAG9
bta-miR-148a	NM_001130683	6052	6059	96	ENSG00000164116	GUCY1A3
bta-miR-13-7336	NM_001130701	3191	3198	97	ENSG00000198252	STYX
bta-miR-12-6501	NM_001130701	3191	3198	97	ENSG00000198252	STYX
bta-miR-186	NM_001130701	214	221	96	ENSG00000198252	STYX
bta-miR-186	NM_001130715	103	110	98	ENSG00000145287	PLAC8
bta-miR-148a	NM_001130823	48	55	96	ENSG00000130816	DNMT1
bta-miR-186	NM_001130841	251	257	95	ENSG00000137996	RTCA
bta-miR-141	NM_001130912	382	389	99	ENSG00000165416	SUGT1
bta-miR-200a	NM_001130912	382	389	99	ENSG00000165416	SUGT1
bta-miR-186	NM_001130960	380	387	97	ENSG00000114805	PLCH1
bta-miR-3-34194	NM_001130963	4161	4167	97	ENSG00000166881	NEMP1
bta-miR-14-10137	NM_001130963	4161	4167	97	ENSG00000166881	NEMP1
bta-miR-186	NM_001130991	1399	1405	98	ENSG00000280682	HYOU1
bta-miR-186	NM_001130991	1399	1405	98	ENSG00000149428	HYOU1
bta-miR-186	NM_001134222	578	585	99	ENSG00000170561	IRX2
bta-miR-13-7336	NM_001134367	60	67	95	ENSG00000131389	SLC6A6
bta-miR-12-6501	NM_001134367	60	67	96	ENSG00000131389	SLC6A6
bta-miR-14-10137	NM_001134369	230	237	97	ENSG00000093167	LRRFIP2
bta-miR-3-34194	NM_001134369	230	237	97	ENSG00000093167	LRRFIP2
bta-miR-14-10137	NM_001134419	336	343	96	ENSG00000097046	CDC7
bta-miR-3-34194	NM_001134419	336	343	96	ENSG00000097046	CDC7
bta-miR-14-10137	NM_001134420	336	343	96	ENSG00000097046	CDC7
bta-miR-3-34194	NM_001134420	336	343	96	ENSG00000097046	CDC7
bta-miR-3-34194	NM_001134430	540	546	96	ENSG00000160404	TOR2A
bta-miR-14-10137	NM_001134430	540	546	96	ENSG00000160404	TOR2A
bta-miR-3-34194	NM_001134431	1896	1902	96	ENSG00000160404	TOR2A
bta-miR-14-10137	NM_001134431	1896	1902	96	ENSG00000160404	TOR2A
bta-miR-3-34194	NM_001134434	507	514	98	ENSG00000107742	SPOCK2
bta-miR-14-10137	NM_001134434	507	514	98	ENSG00000107742	SPOCK2
bta-miR-148a	NM_001134445	2839	2846	97	ENSG00000153904	DDAH1
bta-miR-200a	NM_001134450	26	33	97	ENSG00000166448	TMEM130
bta-miR-141	NM_001134450	26	33	97	ENSG00000166448	TMEM130
bta-miR-200a	NM_001134451	26	33	97	ENSG00000166448	TMEM130
bta-miR-141	NM_001134451	26	33	97	ENSG00000166448	TMEM130
bta-miR-2285e	NM_001134470	502	509	95	ENSG00000181744	C3orf58
bta-miR-148a	NM_001134470	120	127	96	ENSG00000181744	C3orf58
bta-miR-2285c	NM_001134470	502	509	95	ENSG00000181744	C3orf58
bta-miR-13-7336	NM_001134476	4339	4346	95	ENSG00000197147	LRRC8B
bta-miR-12-6501	NM_001134476	4339	4346	95	ENSG00000197147	LRRC8B
bta-miR-13-7336	NM_001134848	198	205	99	ENSG00000198865	CCDC152
bta-miR-12-6501	NM_001134848	198	205	99	ENSG00000198865	CCDC152
bta-miR-3-34194	NM_001135024	860	867	99	ENSG00000110435	PDHX
bta-miR-14-10137	NM_001135024	860	867	99	ENSG00000110435	PDHX
bta-miR-186	NM_001135095	3180	3186	97	ENSG00000075420	FNDC3B
bta-miR-14-10137	NM_001135109	4377	4384	99	ENSG00000166405	RIC3
bta-miR-3-34194	NM_001135109	4377	4384	99	ENSG00000166405	RIC3
bta-miR-14-10137	NM_001135196	638	644	95	ENSG00000177354	C10orf71
bta-miR-3-34194	NM_001135196	638	644	95	ENSG00000177354	C10orf71
bta-miR-141	NM_001135197	567	574	95	ENSG00000173421	CCDC36
bta-miR-200a	NM_001135197	567	574	96	ENSG00000173421	CCDC36
bta-miR-186	NM_001135219	253	259	98	ENSG00000167103	PIP5KL1
bta-miR-13-7336	NM_001135247	332	338	97	ENSG00000117122	MFAP2
bta-miR-12-6501	NM_001135247	332	338	97	ENSG00000117122	MFAP2
bta-miR-13-7336	NM_001135248	332	338	97	ENSG00000117122	MFAP2
bta-miR-12-6501	NM_001135248	332	338	97	ENSG00000117122	MFAP2
bta-miR-12-6501	NM_001135586	21	28	96	ENSG00000181904	C5orf24
bta-miR-141	NM_001135599	105	112	99	ENSG00000092969	TGFB2
bta-miR-200a	NM_001135599	105	112	99	ENSG00000092969	TGFB2
bta-miR-14-10137	NM_001135604	1395	1402	99	ENSG00000164283	ESM1
bta-miR-3-34194	NM_001135604	1395	1402	99	ENSG00000164283	ESM1
bta-miR-200a	NM_001135653	208	215	98	ENSG00000090621	PABPC4
bta-miR-141	NM_001135653	208	215	97	ENSG00000090621	PABPC4
bta-miR-200a	NM_001135654	208	215	98	ENSG00000090621	PABPC4
bta-miR-141	NM_001135654	208	215	97	ENSG00000090621	PABPC4
bta-miR-13-7336	NM_001135699	101	108	99	ENSG00000164924	YWHAZ
bta-miR-12-6501	NM_001135699	101	108	99	ENSG00000164924	YWHAZ
bta-miR-12-6501	NM_001135700	101	108	99	ENSG00000164924	YWHAZ
bta-miR-13-7336	NM_001135700	101	108	99	ENSG00000164924	YWHAZ
bta-miR-13-7336	NM_001135701	101	108	99	ENSG00000164924	YWHAZ
bta-miR-12-6501	NM_001135701	101	108	99	ENSG00000164924	YWHAZ
bta-miR-12-6501	NM_001135702	101	108	99	ENSG00000164924	YWHAZ
bta-miR-13-7336	NM_001135702	101	108	99	ENSG00000164924	YWHAZ
bta-miR-14-10137	NM_001135954	1083	1090	98	ENSG00000130717	UCK1
bta-miR-3-34194	NM_001135954	1083	1090	98	ENSG00000130717	UCK1
bta-miR-200a	NM_001136000	7395	7402	98	ENSG00000143322	ABL2
bta-miR-141	NM_001136000	7395	7402	98	ENSG00000143322	ABL2
bta-miR-3-34194	NM_001136017	275	282	95	ENSG00000112576	CCND3
bta-miR-14-10137	NM_001136017	275	282	95	ENSG00000112576	CCND3
bta-miR-148a	NM_001136024	2782	2789	96	ENSG00000188158	NHS
bta-miR-14-10137	NM_001136125	275	282	95	ENSG00000112576	CCND3
bta-miR-3-34194	NM_001136125	275	282	95	ENSG00000112576	CCND3
bta-miR-3-34194	NM_001136126	275	282	95	ENSG00000112576	CCND3
bta-miR-14-10137	NM_001136126	275	282	95	ENSG00000112576	CCND3
bta-miR-148a	NM_001136161	231	238	99	ENSG00000178460	MCMDC2
bta-miR-14-10137	NM_001136223	2359	2365	95	ENSG00000117625	RCOR3
bta-miR-3-34194	NM_001136223	2359	2365	95	ENSG00000117625	RCOR3
bta-miR-3-34194	NM_001136224	2467	2473	95	ENSG00000117625	RCOR3
bta-miR-14-10137	NM_001136224	2467	2473	95	ENSG00000117625	RCOR3
bta-miR-200a	NM_001136225	196	203	98	ENSG00000117625	RCOR3
bta-miR-141	NM_001136225	196	203	99	ENSG00000117625	RCOR3
bta-miR-141	NM_001136478	2071	2078	98	ENSG00000143401	ANP32E
bta-miR-200a	NM_001136478	2071	2078	98	ENSG00000143401	ANP32E
bta-miR-141	NM_001136479	2071	2078	98	ENSG00000143401	ANP32E
bta-miR-200a	NM_001136479	2071	2078	98	ENSG00000143401	ANP32E
bta-miR-186	NM_001136528	247	254	95	ENSG00000135919	SERPINE2
bta-miR-186	NM_001136530	247	254	95	ENSG00000135919	SERPINE2
bta-miR-186	NM_001142281	1810	1817	97	ENSG00000095139	ARCN1
bta-miR-148a	NM_001142307	648	655	95	ENSG00000110768	GTF2H1
bta-miR-13-7336	NM_001142544	536	543	97	ENSG00000150281	CTF1
bta-miR-12-6501	NM_001142544	536	543	97	ENSG00000150281	CTF1
bta-miR-186	NM_001142595	567	574	95	ENSG00000122884	P4HA1
bta-miR-186	NM_001142596	567	574	95	ENSG00000122884	P4HA1
bta-miR-148a	NM_001142624	82	89	96	ENSG00000109113	RAB34
bta-miR-14-10137	NM_001142645	1043	1050	95	ENSG00000189362	NEMP2
bta-miR-3-34194	NM_001142645	1043	1050	95	ENSG00000189362	NEMP2
bta-miR-200a	NM_001142648	1893	1900	95	ENSG00000079332	SAR1A
bta-miR-186	NM_001142678	2816	2822	98	ENSG00000177119	ANO6
bta-miR-2285c	NM_001142685	3693	3700	99	ENSG00000134909	ARHGAP32
bta-miR-2285e	NM_001142685	3693	3700	99	ENSG00000134909	ARHGAP32
bta-miR-12-6501	NM_001142771	435	442	98	ENSG00000150275	PCDH15
bta-miR-13-7336	NM_001142771	435	442	96	ENSG00000150275	PCDH15
bta-miR-13-7336	NM_001142772	435	442	96	ENSG00000150275	PCDH15
bta-miR-12-6501	NM_001142772	435	442	98	ENSG00000150275	PCDH15
bta-miR-2285c	NM_001142782	132	139	96	ENSG00000081026	MAGI3
bta-miR-2285e	NM_001142782	132	139	96	ENSG00000081026	MAGI3
bta-miR-186	NM_001142885	133	139	95	ENSG00000128872	TMOD2
bta-miR-14-10137	NM_001143760	640	647	99	ENSG00000132507	EIF5A
bta-miR-3-34194	NM_001143760	640	647	99	ENSG00000132507	EIF5A
bta-miR-3-34194	NM_001143761	640	647	99	ENSG00000132507	EIF5A
bta-miR-14-10137	NM_001143761	640	647	99	ENSG00000132507	EIF5A
bta-miR-3-34194	NM_001143762	640	647	99	ENSG00000132507	EIF5A
bta-miR-14-10137	NM_001143762	640	647	99	ENSG00000132507	EIF5A
bta-miR-14-10137	NM_001143773	42	49	95	ENSG00000148541	FAM13C
bta-miR-3-34194	NM_001143773	42	49	95	ENSG00000148541	FAM13C
bta-miR-200a	NM_001143774	462	469	96	ENSG00000165443	PHYHIPL
bta-miR-141	NM_001143774	462	469	96	ENSG00000165443	PHYHIPL
bta-miR-141	NM_001143787	1101	1108	95	ENSG00000134283	PPHLN1
bta-miR-200a	NM_001143787	1101	1108	96	ENSG00000134283	PPHLN1
bta-miR-186	NM_001144071	18	25	99	ENSG00000166800	LDHAL6A
bta-miR-3-34194	NM_001144071	310	317	98	ENSG00000166800	LDHAL6A
bta-miR-14-10137	NM_001144071	310	317	98	ENSG00000166800	LDHAL6A
bta-miR-141	NM_001144755	537	544	97	ENSG00000185697	MYBL1
bta-miR-200a	NM_001144755	537	544	97	ENSG00000185697	MYBL1
bta-miR-141	NM_001144884	135	142	98	ENSG00000162695	SLC30A7
bta-miR-200a	NM_001144884	135	142	98	ENSG00000162695	SLC30A7
bta-miR-186	NM_001144891	437	443	95	ENSG00000151332	MBIP
bta-miR-14-10137	NM_001144920	131	138	97	ENSG00000105948	TTC26
bta-miR-3-34194	NM_001144920	131	138	97	ENSG00000105948	TTC26
bta-miR-3-34194	NM_001144923	64	71	98	ENSG00000105948	TTC26
bta-miR-14-10137	NM_001144923	64	71	98	ENSG00000105948	TTC26
bta-miR-148a	NM_001144942	82	89	96	ENSG00000109113	RAB34
bta-miR-148a	NM_001144943	82	89	96	ENSG00000109113	RAB34
bta-miR-13-7336	NM_001144952	3676	3683	99	ENSG00000069188	SDK2
bta-miR-12-6501	NM_001144952	3676	3683	99	ENSG00000069188	SDK2
bta-miR-12-6501	NM_001145017	360	367	96	ENSG00000186334	SLC36A3
bta-miR-13-7336	NM_001145017	360	367	97	ENSG00000186334	SLC36A3
bta-miR-14-10137	NM_001145080	262	269	99	ENSG00000180336	MEIOC
bta-miR-3-34194	NM_001145080	262	269	99	ENSG00000180336	MEIOC
bta-miR-186	NM_001145122	1303	1309	96	ENSG00000214711	CAPN14
bta-miR-200a	NM_001145152	2799	2806	99	ENSG00000155975	VPS37A
bta-miR-141	NM_001145152	2799	2806	98	ENSG00000155975	VPS37A
bta-miR-148a	NM_001145207	160	167	99	ENSG00000112339	HBS1L
bta-miR-186	NM_001145208	814	820	99	ENSG00000035499	DEPDC1B
bta-miR-186	NM_001145256	81	88	98	ENSG00000198001	IRAK4
bta-miR-186	NM_001145257	81	88	98	ENSG00000198001	IRAK4
bta-miR-186	NM_001145258	81	88	98	ENSG00000198001	IRAK4
bta-miR-200a	NM_001145313	236	243	96	ENSG00000106701	FSD1L
bta-miR-141	NM_001145313	236	243	96	ENSG00000106701	FSD1L
bta-miR-186	NM_001145335	740	747	95	ENSG00000140367	UBE2Q2
bta-miR-14-10137	NM_001145335	879	886	99	ENSG00000140367	UBE2Q2
bta-miR-3-34194	NM_001145335	879	886	99	ENSG00000140367	UBE2Q2
bta-miR-186	NM_001145335	257	263	95	ENSG00000140367	UBE2Q2
bta-miR-186	NM_001145335	682	689	96	ENSG00000140367	UBE2Q2
bta-miR-148a	NM_001145459	734	741	99	ENSG00000171476	HOPX
bta-miR-148a	NM_001145460	801	808	99	ENSG00000171476	HOPX
bta-miR-2285c	NM_001145520	1257	1264	95	ENSG00000039560	RAI14
bta-miR-2285c	NM_001145521	1257	1264	95	ENSG00000039560	RAI14
bta-miR-2285c	NM_001145522	1257	1264	95	ENSG00000039560	RAI14
bta-miR-2285c	NM_001145523	1257	1264	95	ENSG00000039560	RAI14
bta-miR-2285c	NM_001145525	1257	1264	95	ENSG00000039560	RAI14
bta-miR-186	NM_001145541	647	653	98	ENSG00000176148	TCP11L1
bta-miR-148a	NM_001145541	157	164	99	ENSG00000176148	TCP11L1
bta-miR-13-7336	NM_001145666	3587	3593	95	ENSG00000090863	GLG1
bta-miR-13-7336	NM_001145667	4610	4616	95	ENSG00000090863	GLG1
bta-miR-186	NM_001145668	2029	2035	96	ENSG00000233932	CTXN2
bta-miR-186	NM_001145678	1961	1967	95	ENSG00000185261	KIAA0825
bta-miR-2285c	NM_001145734	143	150	96	ENSG00000164287	CDC20B
bta-miR-2285e	NM_001145734	143	150	96	ENSG00000164287	CDC20B
bta-miR-186	NM_001145933	99	105	95	ENSG00000007350	TKTL1
bta-miR-186	NM_001145934	99	105	95	ENSG00000007350	TKTL1
bta-miR-13-7336	NM_001145938	361	368	95	ENSG00000196611	MMP1
bta-miR-12-6501	NM_001145938	361	368	97	ENSG00000196611	MMP1
bta-miR-200a	NM_001146015	218	224	95	ENSG00000126787	DLGAP5
bta-miR-141	NM_001146015	218	224	96	ENSG00000126787	DLGAP5
bta-miR-13-7336	NM_001146054	1619	1626	97	ENSG00000145335	SNCA
bta-miR-12-6501	NM_001146054	1619	1626	97	ENSG00000145335	SNCA
bta-miR-13-7336	NM_001146055	1619	1626	97	ENSG00000145335	SNCA
bta-miR-12-6501	NM_001146055	1619	1626	97	ENSG00000145335	SNCA
bta-miR-3-34194	NM_001146068	411	418	95	ENSG00000162909	CAPN2
bta-miR-14-10137	NM_001146068	411	418	95	ENSG00000162909	CAPN2
bta-miR-12-6501	NM_001146110	3272	3279	96	ENSG00000198160	MIER1
bta-miR-13-7336	NM_001146110	3272	3279	97	ENSG00000198160	MIER1
bta-miR-148a	NM_001146111	58	65	98	ENSG00000198160	MIER1
bta-miR-13-7336	NM_001146111	1791	1798	97	ENSG00000198160	MIER1
bta-miR-200a	NM_001146111	164	171	97	ENSG00000198160	MIER1
bta-miR-141	NM_001146111	164	171	97	ENSG00000198160	MIER1
bta-miR-12-6501	NM_001146111	1791	1798	96	ENSG00000198160	MIER1
bta-miR-12-6501	NM_001146112	3272	3279	96	ENSG00000198160	MIER1
bta-miR-13-7336	NM_001146112	3272	3279	97	ENSG00000198160	MIER1
bta-miR-13-7336	NM_001146113	1791	1798	97	ENSG00000198160	MIER1
bta-miR-200a	NM_001146113	164	171	97	ENSG00000198160	MIER1
bta-miR-12-6501	NM_001146113	1791	1798	96	ENSG00000198160	MIER1
bta-miR-148a	NM_001146113	58	65	98	ENSG00000198160	MIER1
bta-miR-141	NM_001146113	164	171	97	ENSG00000198160	MIER1
bta-miR-12-6501	NM_001146116	1762	1769	99	ENSG00000160305	DIP2A
bta-miR-13-7336	NM_001146116	1762	1769	99	ENSG00000160305	DIP2A
bta-miR-13-7336	NM_001146169	694	701	96	ENSG00000203705	TATDN3
bta-miR-12-6501	NM_001146169	694	701	96	ENSG00000203705	TATDN3
bta-miR-13-7336	NM_001146170	605	612	96	ENSG00000203705	TATDN3
bta-miR-12-6501	NM_001146170	605	612	96	ENSG00000203705	TATDN3
bta-miR-13-7336	NM_001146171	605	612	96	ENSG00000203705	TATDN3
bta-miR-12-6501	NM_001146171	605	612	96	ENSG00000203705	TATDN3
bta-miR-186	NM_001146256	4109	4116	98	ENSG00000102383	ZDHHC15
bta-miR-186	NM_001146590	368	375	99	ENSG00000164089	ETNPPL
bta-miR-186	NM_001146627	368	375	99	ENSG00000164089	ETNPPL
bta-miR-12-6501	NM_001153446	955	962	95	ENSG00000153130	SCOC
bta-miR-3-34194	NM_001153446	266	272	96	ENSG00000153130	SCOC
bta-miR-14-10137	NM_001153446	266	272	96	ENSG00000153130	SCOC
bta-miR-13-7336	NM_001153446	955	962	96	ENSG00000153130	SCOC
bta-miR-3-34194	NM_001153484	266	272	96	ENSG00000153130	SCOC
bta-miR-14-10137	NM_001153484	266	272	96	ENSG00000153130	SCOC
bta-miR-12-6501	NM_001153484	955	962	95	ENSG00000153130	SCOC
bta-miR-13-7336	NM_001153484	955	962	96	ENSG00000153130	SCOC
bta-miR-13-7336	NM_001153552	955	962	96	ENSG00000153130	SCOC
bta-miR-14-10137	NM_001153552	266	272	96	ENSG00000153130	SCOC
bta-miR-12-6501	NM_001153552	955	962	95	ENSG00000153130	SCOC
bta-miR-3-34194	NM_001153552	266	272	96	ENSG00000153130	SCOC
bta-miR-13-7336	NM_001153585	955	962	96	ENSG00000153130	SCOC
bta-miR-3-34194	NM_001153585	266	272	96	ENSG00000153130	SCOC
bta-miR-14-10137	NM_001153585	266	272	96	ENSG00000153130	SCOC
bta-miR-12-6501	NM_001153585	955	962	95	ENSG00000153130	SCOC
bta-miR-14-10137	NM_001153635	266	272	96	ENSG00000153130	SCOC
bta-miR-12-6501	NM_001153635	955	962	95	ENSG00000153130	SCOC
bta-miR-3-34194	NM_001153635	266	272	96	ENSG00000153130	SCOC
bta-miR-13-7336	NM_001153635	955	962	96	ENSG00000153130	SCOC
bta-miR-13-7336	NM_001153663	955	962	96	ENSG00000153130	SCOC
bta-miR-12-6501	NM_001153663	955	962	95	ENSG00000153130	SCOC
bta-miR-14-10137	NM_001153663	266	272	96	ENSG00000153130	SCOC
bta-miR-3-34194	NM_001153663	266	272	96	ENSG00000153130	SCOC
bta-miR-186	NM_001159	244	251	96	ENSG00000138356	AOX1
bta-miR-3-34194	NM_001159547	4222	4229	98	ENSG00000188848	BEND4
bta-miR-14-10137	NM_001159547	4222	4229	98	ENSG00000188848	BEND4
bta-miR-186	NM_001159936	96	102	96	ENSG00000117395	EBNA1BP2
bta-miR-148a	NM_001160033	335	342	98	ENSG00000163535	SGO2
bta-miR-14-10137	NM_001160103	152	158	95	ENSG00000100722	ZC3H14
bta-miR-3-34194	NM_001160103	152	158	95	ENSG00000100722	ZC3H14
bta-miR-3-34194	NM_001160104	152	158	95	ENSG00000100722	ZC3H14
bta-miR-14-10137	NM_001160104	152	158	95	ENSG00000100722	ZC3H14
bta-miR-12-6501	NM_001160116	70	76	95	ENSG00000169609	C15orf40
bta-miR-2285e	NM_001160147	72	78	96	ENSG00000100523	DDHD1
bta-miR-2285c	NM_001160147	72	78	96	ENSG00000100523	DDHD1
bta-miR-14-10137	NM_001160147	470	477	97	ENSG00000100523	DDHD1
bta-miR-3-34194	NM_001160147	470	477	97	ENSG00000100523	DDHD1
bta-miR-13-7336	NM_001160147	73	80	99	ENSG00000100523	DDHD1
bta-miR-12-6501	NM_001160147	73	80	99	ENSG00000100523	DDHD1
bta-miR-2285e	NM_001160148	72	78	96	ENSG00000100523	DDHD1
bta-miR-2285c	NM_001160148	72	78	96	ENSG00000100523	DDHD1
bta-miR-14-10137	NM_001160148	470	477	97	ENSG00000100523	DDHD1
bta-miR-12-6501	NM_001160148	73	80	99	ENSG00000100523	DDHD1
bta-miR-13-7336	NM_001160148	73	80	99	ENSG00000100523	DDHD1
bta-miR-3-34194	NM_001160148	470	477	97	ENSG00000100523	DDHD1
bta-miR-186	NM_001160223	2230	2236	96	ENSG00000120925	RNF170
bta-miR-186	NM_001160225	2230	2236	96	ENSG00000120925	RNF170
bta-miR-200a	NM_001160300	814	821	97	ENSG00000073150	PANX2
bta-miR-141	NM_001160300	814	821	96	ENSG00000073150	PANX2
bta-miR-148a	NM_001160305	58	65	98	ENSG00000103037	SETD6
bta-miR-148a	NM_001160306	95	102	97	ENSG00000159082	SYNJ1
bta-miR-148a	NM_001161363	732	739	97	ENSG00000156642	NPTN
bta-miR-148a	NM_001161364	732	739	97	ENSG00000156642	NPTN
bta-miR-186	NM_001161429	576	582	95	ENSG00000164188	RANBP3L
bta-miR-14-10137	NM_001162429	2860	2867	99	ENSG00000170248	PDCD6IP
bta-miR-3-34194	NM_001162429	2860	2867	99	ENSG00000170248	PDCD6IP
bta-miR-14-10137	NM_001163213	1234	1241	99	ENSG00000068078	FGFR3
bta-miR-3-34194	NM_001163213	1234	1241	99	ENSG00000068078	FGFR3
bta-miR-200a	NM_001163334	136	143	95	ENSG00000147041	SYTL5
bta-miR-141	NM_001163334	136	143	95	ENSG00000147041	SYTL5
bta-miR-141	NM_001163335	136	143	95	ENSG00000147041	SYTL5
bta-miR-200a	NM_001163335	136	143	95	ENSG00000147041	SYTL5
bta-miR-13-7336	NM_001163380	1116	1123	96	ENSG00000129472	RAB2B
bta-miR-186	NM_001163380	277	283	97	ENSG00000129472	RAB2B
bta-miR-12-6501	NM_001163380	1116	1123	97	ENSG00000129472	RAB2B
bta-miR-148a	NM_001163435	310	317	95	ENSG00000145348	TBCK
bta-miR-186	NM_001163435	443	450	96	ENSG00000145348	TBCK
bta-miR-148a	NM_001163436	310	317	95	ENSG00000145348	TBCK
bta-miR-186	NM_001163436	443	450	96	ENSG00000145348	TBCK
bta-miR-148a	NM_001163437	310	317	95	ENSG00000145348	TBCK
bta-miR-186	NM_001163437	443	450	96	ENSG00000145348	TBCK
bta-miR-141	NM_001163508	757	764	99	ENSG00000119599	DCAF4
bta-miR-200a	NM_001163508	757	764	99	ENSG00000119599	DCAF4
bta-miR-141	NM_001163509	757	764	99	ENSG00000119599	DCAF4
bta-miR-200a	NM_001163509	757	764	99	ENSG00000119599	DCAF4
bta-miR-3-34194	NM_001163560	260	267	99	ENSG00000162039	MEIOB
bta-miR-14-10137	NM_001163560	260	267	99	ENSG00000162039	MEIOB
bta-miR-186	NM_001163940	59	66	97	ENSG00000100504	PYGL
bta-miR-141	NM_001163942	1038	1045	99	ENSG00000004846	ABCB5
bta-miR-200a	NM_001163942	1038	1045	99	ENSG00000004846	ABCB5
bta-miR-2285e	NM_001164245	535	542	97	ENSG00000157181	C1orf27
bta-miR-2285c	NM_001164245	535	542	97	ENSG00000157181	C1orf27
bta-miR-2285c	NM_001164246	535	542	97	ENSG00000157181	C1orf27
bta-miR-2285e	NM_001164246	535	542	97	ENSG00000157181	C1orf27
bta-miR-6522	NM_001164317	1025	1032	95	ENSG00000136068	FLNB
bta-miR-6522	NM_001164318	1025	1032	95	ENSG00000136068	FLNB
bta-miR-6522	NM_001164319	1025	1032	95	ENSG00000136068	FLNB
bta-miR-186	NM_001164384	2221	2227	95	ENSG00000040341	STAU2
bta-miR-186	NM_001164385	2221	2227	95	ENSG00000040341	STAU2
bta-miR-186	NM_001164435	18	25	98	ENSG00000231068	KRTAP21-3
bta-miR-186	NM_001164468	1859	1866	99	ENSG00000251201	TMED7-TICAM2
bta-miR-186	NM_001164469	2612	2619	99	ENSG00000251201	TMED7-TICAM2
bta-miR-14-10137	NM_001164489	502	508	96	ENSG00000151651	ADAM8
bta-miR-3-34194	NM_001164489	502	508	96	ENSG00000151651	ADAM8
bta-miR-3-34194	NM_001164490	422	428	96	ENSG00000151651	ADAM8
bta-miR-14-10137	NM_001164490	422	428	96	ENSG00000151651	ADAM8
bta-miR-3-34194	NM_001164579	3683	3690	99	ENSG00000185716	C16orf52
bta-miR-14-10137	NM_001164579	3683	3690	99	ENSG00000185716	C16orf52
bta-miR-186	NM_001164685	1403	1409	96	ENSG00000275122	THEMIS
bta-miR-186	NM_001164685	1403	1409	96	ENSG00000172673	THEMIS
bta-miR-186	NM_001164687	1403	1409	96	ENSG00000275122	THEMIS
bta-miR-186	NM_001164687	1403	1409	96	ENSG00000172673	THEMIS
bta-miR-12-6501	NM_001164694	3096	3103	99	ENSG00000009765	IYD
bta-miR-13-7336	NM_001164694	3096	3103	99	ENSG00000009765	IYD
bta-miR-13-7336	NM_001164695	3183	3190	99	ENSG00000009765	IYD
bta-miR-12-6501	NM_001164695	3183	3190	99	ENSG00000009765	IYD
bta-miR-141	NM_001166050	127	134	97	ENSG00000163697	APBB2
bta-miR-200a	NM_001166050	127	134	98	ENSG00000163697	APBB2
bta-miR-141	NM_001166051	127	134	97	ENSG00000163697	APBB2
bta-miR-200a	NM_001166051	127	134	98	ENSG00000163697	APBB2
bta-miR-141	NM_001166052	127	134	97	ENSG00000163697	APBB2
bta-miR-200a	NM_001166052	127	134	98	ENSG00000163697	APBB2
bta-miR-200a	NM_001166053	127	134	98	ENSG00000163697	APBB2
bta-miR-141	NM_001166053	127	134	97	ENSG00000163697	APBB2
bta-miR-200a	NM_001166054	127	134	98	ENSG00000163697	APBB2
bta-miR-141	NM_001166054	127	134	97	ENSG00000163697	APBB2
bta-miR-3-34194	NM_001166103	459	466	99	ENSG00000167642	SPINT2
bta-miR-14-10137	NM_001166103	459	466	99	ENSG00000167642	SPINT2
bta-miR-14-10137	NM_001166158	860	867	99	ENSG00000110435	PDHX
bta-miR-3-34194	NM_001166158	860	867	99	ENSG00000110435	PDHX
bta-miR-186	NM_001166226	1318	1324	95	ENSG00000168944	CEP120
bta-miR-12-6501	NM_001166247	1287	1294	98	ENSG00000164418	GRIK2
bta-miR-13-7336	NM_001166247	1287	1294	98	ENSG00000164418	GRIK2
bta-miR-3-34194	NM_001166271	2799	2805	95	ENSG00000182957	SPATA13
bta-miR-14-10137	NM_001166271	2799	2805	95	ENSG00000182957	SPATA13
bta-miR-2285e	NM_001166301	416	423	97	ENSG00000108406	DHX40
bta-miR-2285c	NM_001166301	416	423	97	ENSG00000108406	DHX40
bta-miR-12-6501	NM_001166305	740	747	96	ENSG00000145014	TMEM44
bta-miR-13-7336	NM_001166305	740	747	96	ENSG00000145014	TMEM44
bta-miR-13-7336	NM_001166306	832	839	96	ENSG00000145014	TMEM44
bta-miR-12-6501	NM_001166306	832	839	96	ENSG00000145014	TMEM44
bta-miR-13-7336	NM_001166386	170	177	98	ENSG00000213401	MAGEA12
bta-miR-12-6501	NM_001166386	170	177	99	ENSG00000213401	MAGEA12
bta-miR-12-6501	NM_001166387	170	177	99	ENSG00000213401	MAGEA12
bta-miR-13-7336	NM_001166387	170	177	98	ENSG00000213401	MAGEA12
bta-miR-14-10137	NM_001166698	42	49	95	ENSG00000148541	FAM13C
bta-miR-3-34194	NM_001166698	42	49	95	ENSG00000148541	FAM13C
bta-miR-186	NM_001167	4434	4441	99	ENSG00000101966	XIAP
bta-miR-148a	NM_001167594	237	244	97	ENSG00000064601	CTSA
bta-miR-186	NM_001167915	81	88	95	ENSG00000197415	VEPH1
bta-miR-186	NM_001167916	81	88	95	ENSG00000197415	VEPH1
bta-miR-200a	NM_001168236	7395	7402	98	ENSG00000143322	ABL2
bta-miR-141	NM_001168236	7395	7402	98	ENSG00000143322	ABL2
bta-miR-200a	NM_001168237	7395	7402	98	ENSG00000143322	ABL2
bta-miR-141	NM_001168237	7395	7402	98	ENSG00000143322	ABL2
bta-miR-200a	NM_001168238	7395	7402	98	ENSG00000143322	ABL2
bta-miR-141	NM_001168238	7395	7402	98	ENSG00000143322	ABL2
bta-miR-141	NM_001168239	7395	7402	98	ENSG00000143322	ABL2
bta-miR-200a	NM_001168239	7395	7402	98	ENSG00000143322	ABL2
bta-miR-3-34194	NM_001168385	324	331	98	ENSG00000101901	ALG13
bta-miR-14-10137	NM_001168385	324	331	98	ENSG00000101901	ALG13
bta-miR-14-10137	NM_001168385	197	204	99	ENSG00000101901	ALG13
bta-miR-3-34194	NM_001168385	197	204	99	ENSG00000101901	ALG13
bta-miR-200a	NM_001168398	686	692	95	ENSG00000164414	SLC35A1
bta-miR-141	NM_001168398	686	692	95	ENSG00000164414	SLC35A1
bta-miR-3-34194	NM_001168412	2851	2857	98	ENSG00000140391	TSPAN3
bta-miR-14-10137	NM_001168412	2851	2857	98	ENSG00000140391	TSPAN3
bta-miR-186	NM_001168474	752	759	99	ENSG00000102387	TAF7L
bta-miR-13-7336	NM_001168530	236	243	99	ENSG00000102048	ASB9
bta-miR-12-6501	NM_001168530	236	243	98	ENSG00000102048	ASB9
bta-miR-12-6501	NM_001168531	236	243	98	ENSG00000102048	ASB9
bta-miR-13-7336	NM_001168531	236	243	99	ENSG00000102048	ASB9
bta-miR-141	NM_001168724	99	106	98	ENSG00000166575	TMEM135
bta-miR-200a	NM_001168724	99	106	98	ENSG00000166575	TMEM135
bta-miR-200a	NM_001169106	183	190	98	ENSG00000172661	FAM21C
bta-miR-141	NM_001169106	183	190	98	ENSG00000172661	FAM21C
bta-miR-200a	NM_001169107	183	190	98	ENSG00000172661	FAM21C
bta-miR-141	NM_001169107	183	190	98	ENSG00000172661	FAM21C
bta-miR-141	NM_001169154	551	558	97	ENSG00000080572	PIH1D3
bta-miR-200a	NM_001169154	551	558	97	ENSG00000080572	PIH1D3
bta-miR-2285c	NM_001170402	143	150	96	ENSG00000164287	CDC20B
bta-miR-2285e	NM_001170402	143	150	96	ENSG00000164287	CDC20B
bta-miR-186	NM_001170637	2870	2877	99	ENSG00000266028	SRGAP2
bta-miR-141	NM_001170690	177	184	95	ENSG00000175356	SCUBE2
bta-miR-186	NM_001170807	784	790	96	ENSG00000112214	FHL5
bta-miR-12-6501	NM_001170931	1194	1201	95	ENSG00000184481	FOXO4
bta-miR-141	NM_001171025	3682	3689	99	ENSG00000153707	PTPRD
bta-miR-200a	NM_001171025	3682	3689	99	ENSG00000153707	PTPRD
bta-miR-186	NM_001171622	431	437	98	ENSG00000112715	VEGFA
bta-miR-186	NM_001171623	431	437	98	ENSG00000112715	VEGFA
bta-miR-186	NM_001171624	431	437	98	ENSG00000112715	VEGFA
bta-miR-186	NM_001171625	431	437	98	ENSG00000112715	VEGFA
bta-miR-186	NM_001171626	431	437	98	ENSG00000112715	VEGFA
bta-miR-186	NM_001171627	447	453	98	ENSG00000112715	VEGFA
bta-miR-186	NM_001171628	431	437	98	ENSG00000112715	VEGFA
bta-miR-186	NM_001171629	365	371	99	ENSG00000112715	VEGFA
bta-miR-186	NM_001171630	431	437	98	ENSG00000112715	VEGFA
bta-miR-200a	NM_001171653	209	216	97	ENSG00000169554	ZEB2
bta-miR-141	NM_001171653	209	216	97	ENSG00000169554	ZEB2
bta-miR-200a	NM_001171713	313	320	95	ENSG00000153558	FBXL2
bta-miR-186	NM_001171805	1928	1934	96	ENSG00000112941	PAPD7
bta-miR-2285e	NM_001171876	802	808	96	ENSG00000101977	MCF2
bta-miR-2285e	NM_001171876	109	116	99	ENSG00000101977	MCF2
bta-miR-2285c	NM_001171876	802	808	96	ENSG00000101977	MCF2
bta-miR-2285c	NM_001171876	109	116	99	ENSG00000101977	MCF2
bta-miR-2285c	NM_001171877	774	780	96	ENSG00000101977	MCF2
bta-miR-2285e	NM_001171877	81	88	99	ENSG00000101977	MCF2
bta-miR-2285c	NM_001171877	81	88	99	ENSG00000101977	MCF2
bta-miR-2285e	NM_001171877	774	780	96	ENSG00000101977	MCF2
bta-miR-2285e	NM_001171878	774	780	96	ENSG00000101977	MCF2
bta-miR-2285c	NM_001171878	774	780	96	ENSG00000101977	MCF2
bta-miR-2285c	NM_001171878	81	88	99	ENSG00000101977	MCF2
bta-miR-2285e	NM_001171878	81	88	99	ENSG00000101977	MCF2
bta-miR-2285e	NM_001171879	802	808	96	ENSG00000101977	MCF2
bta-miR-2285e	NM_001171879	109	116	99	ENSG00000101977	MCF2
bta-miR-2285c	NM_001171879	802	808	96	ENSG00000101977	MCF2
bta-miR-2285c	NM_001171879	109	116	99	ENSG00000101977	MCF2
bta-miR-13-7336	NM_001171991	1284	1290	96	ENSG00000004961	HCCS
bta-miR-12-6501	NM_001171991	1284	1290	96	ENSG00000004961	HCCS
bta-miR-3-34194	NM_001172437	276	283	96	ENSG00000242265	PEG10
bta-miR-14-10137	NM_001172437	276	283	96	ENSG00000242265	PEG10
bta-miR-186	NM_001172574	148	155	97	ENSG00000147316	MCPH1
bta-miR-186	NM_001172575	148	155	97	ENSG00000147316	MCPH1
bta-miR-186	NM_001172779	73	79	95	ENSG00000171757	LRRC34
bta-miR-200a	NM_001172828	511	518	95	ENSG00000198492	YTHDF2
bta-miR-141	NM_001172828	511	518	96	ENSG00000198492	YTHDF2
bta-miR-141	NM_001173128	511	518	96	ENSG00000198492	YTHDF2
bta-miR-200a	NM_001173128	511	518	95	ENSG00000198492	YTHDF2
bta-miR-3-34194	NM_001173463	1035	1042	98	ENSG00000139116	KIF21A
bta-miR-14-10137	NM_001173463	1035	1042	98	ENSG00000139116	KIF21A
bta-miR-3-34194	NM_001173464	1035	1042	98	ENSG00000139116	KIF21A
bta-miR-14-10137	NM_001173464	1035	1042	98	ENSG00000139116	KIF21A
bta-miR-14-10137	NM_001173465	1035	1042	98	ENSG00000139116	KIF21A
bta-miR-3-34194	NM_001173465	1035	1042	98	ENSG00000139116	KIF21A
bta-miR-186	NM_001173482	1152	1159	96	ENSG00000113851	CRBN
bta-miR-186	NM_001173524	1076	1082	97	ENSG00000116747	TROVE2
bta-miR-14-10137	NM_001174087	3206	3213	99	ENSG00000124151	NCOA3
bta-miR-3-34194	NM_001174087	3206	3213	99	ENSG00000124151	NCOA3
bta-miR-14-10137	NM_001174088	3206	3213	99	ENSG00000124151	NCOA3
bta-miR-3-34194	NM_001174088	3206	3213	99	ENSG00000124151	NCOA3
bta-miR-13-7336	NM_001174093	218	224	95	ENSG00000148516	ZEB1
bta-miR-13-7336	NM_001174094	218	224	95	ENSG00000148516	ZEB1
bta-miR-13-7336	NM_001174095	218	224	95	ENSG00000148516	ZEB1
bta-miR-13-7336	NM_001174096	218	224	95	ENSG00000148516	ZEB1
bta-miR-200a	NM_001177387	147	154	96	ENSG00000163635	ATXN7
bta-miR-141	NM_001177387	147	154	96	ENSG00000163635	ATXN7
bta-miR-13-7336	NM_001177693	123	130	98	ENSG00000214944	ARHGEF28
bta-miR-12-6501	NM_001177693	123	130	98	ENSG00000214944	ARHGEF28
bta-miR-141	NM_001178034	2021	2027	95	ENSG00000175497	DPP10
bta-miR-200a	NM_001178034	2021	2027	95	ENSG00000175497	DPP10
bta-miR-141	NM_001178036	2021	2027	95	ENSG00000175497	DPP10
bta-miR-200a	NM_001178036	2021	2027	95	ENSG00000175497	DPP10
bta-miR-141	NM_001178037	2021	2027	96	ENSG00000175497	DPP10
bta-miR-200a	NM_001178037	2021	2027	96	ENSG00000175497	DPP10
bta-miR-186	NM_001178091	304	311	98	ENSG00000060982	BCAT1
bta-miR-186	NM_001178092	304	311	98	ENSG00000060982	BCAT1
bta-miR-186	NM_001178093	304	311	98	ENSG00000060982	BCAT1
bta-miR-186	NM_001178094	304	311	98	ENSG00000060982	BCAT1
bta-miR-186	NM_001178137	3329	3336	97	ENSG00000107864	CPEB3
bta-miR-186	NM_001184690	2617	2623	98	ENSG00000168743	NPNT
bta-miR-186	NM_001184691	2617	2623	98	ENSG00000168743	NPNT
bta-miR-186	NM_001184692	2617	2623	98	ENSG00000168743	NPNT
bta-miR-186	NM_001184693	2617	2623	98	ENSG00000168743	NPNT
bta-miR-186	NM_001184700	1012	1019	99	ENSG00000109814	UGDH
bta-miR-186	NM_001184701	1012	1019	99	ENSG00000109814	UGDH
bta-miR-186	NM_001184717	1611	1618	99	ENSG00000163659	TIPARP
bta-miR-3-34194	NM_001184717	163	169	97	ENSG00000163659	TIPARP
bta-miR-186	NM_001184717	184	191	99	ENSG00000163659	TIPARP
bta-miR-14-10137	NM_001184717	163	169	97	ENSG00000163659	TIPARP
bta-miR-186	NM_001184718	184	191	99	ENSG00000163659	TIPARP
bta-miR-186	NM_001184718	1611	1618	99	ENSG00000163659	TIPARP
bta-miR-14-10137	NM_001184718	163	169	97	ENSG00000163659	TIPARP
bta-miR-3-34194	NM_001184718	163	169	97	ENSG00000163659	TIPARP
bta-miR-141	NM_001184779	440	447	97	ENSG00000255346	NOX5
bta-miR-200a	NM_001184779	440	447	97	ENSG00000255346	NOX5
bta-miR-141	NM_001184780	440	447	97	ENSG00000255346	NOX5
bta-miR-200a	NM_001184780	440	447	97	ENSG00000255346	NOX5
bta-miR-141	NM_001184874	306	312	95	ENSG00000158301	GPRASP2
bta-miR-141	NM_001184875	306	312	95	ENSG00000158301	GPRASP2
bta-miR-141	NM_001184876	306	312	95	ENSG00000158301	GPRASP2
bta-miR-14-10137	NM_001184961	276	283	96	ENSG00000242265	PEG10
bta-miR-3-34194	NM_001184961	276	283	96	ENSG00000242265	PEG10
bta-miR-2285e	NM_001184965	76	83	99	ENSG00000131725	WDR44
bta-miR-2285c	NM_001184965	76	83	99	ENSG00000131725	WDR44
bta-miR-2285c	NM_001184966	76	83	99	ENSG00000131725	WDR44
bta-miR-2285e	NM_001184966	76	83	99	ENSG00000131725	WDR44
bta-miR-12-6501	NM_001185059	244	251	98	ENSG00000083223	ZCCHC6
bta-miR-13-7336	NM_001185059	244	251	98	ENSG00000083223	ZCCHC6
bta-miR-12-6501	NM_001185074	244	251	98	ENSG00000083223	ZCCHC6
bta-miR-13-7336	NM_001185074	244	251	98	ENSG00000083223	ZCCHC6
bta-miR-141	NM_001185085	164	170	96	ENSG00000075673	ATP12A
bta-miR-200a	NM_001185085	164	170	96	ENSG00000075673	ATP12A
bta-miR-186	NM_001190263	543	550	98	ENSG00000197223	C1D
bta-miR-186	NM_001190265	543	550	98	ENSG00000197223	C1D
bta-miR-14-10137	NM_001190463	286	293	99	ENSG00000116761	CTH
bta-miR-3-34194	NM_001190463	286	293	99	ENSG00000116761	CTH
bta-miR-3-34194	NM_001190709	1490	1496	96	ENSG00000060718	COL11A1
bta-miR-2285c	NM_001190709	959	966	95	ENSG00000060718	COL11A1
bta-miR-2285e	NM_001190709	959	966	95	ENSG00000060718	COL11A1
bta-miR-14-10137	NM_001190709	1490	1496	96	ENSG00000060718	COL11A1
bta-miR-13-7336	NM_001190826	91	98	97	ENSG00000196227	FAM217B
bta-miR-12-6501	NM_001190826	91	98	97	ENSG00000196227	FAM217B
bta-miR-12-6501	NM_001190827	91	98	97	ENSG00000196227	FAM217B
bta-miR-13-7336	NM_001190827	91	98	97	ENSG00000196227	FAM217B
bta-miR-186	NM_001190946	322	329	96	ENSG00000146067	FAM193B
bta-miR-13-7336	NM_001190964	77	84	98	ENSG00000121741	ZMYM2
bta-miR-12-6501	NM_001190964	77	84	98	ENSG00000121741	ZMYM2
bta-miR-186	NM_001190964	206	212	98	ENSG00000121741	ZMYM2
bta-miR-13-7336	NM_001190965	77	84	98	ENSG00000121741	ZMYM2
bta-miR-12-6501	NM_001190965	77	84	98	ENSG00000121741	ZMYM2
bta-miR-186	NM_001190965	206	212	98	ENSG00000121741	ZMYM2
bta-miR-200a	NM_001190977	250	257	96	ENSG00000015153	YAF2
bta-miR-141	NM_001190977	250	257	96	ENSG00000015153	YAF2
bta-miR-200a	NM_001190979	250	257	96	ENSG00000015153	YAF2
bta-miR-141	NM_001190979	250	257	96	ENSG00000015153	YAF2
bta-miR-148a	NM_001190981	237	244	98	ENSG00000134352	IL6ST
bta-miR-186	NM_001191324	163	169	96	ENSG00000134758	RNF138
bta-miR-148a	NM_001193268	282	289	98	ENSG00000125746	EML2
bta-miR-148a	NM_001193269	282	289	98	ENSG00000125746	EML2
bta-miR-186	NM_001193329	477	484	97	ENSG00000148120	C9orf3
bta-miR-186	NM_001193528	89	96	96	ENSG00000144306	SCRN3
bta-miR-186	NM_001195044	3215	3222	97	ENSG00000137693	YAP1
bta-miR-186	NM_001195044	3378	3384	98	ENSG00000137693	YAP1
bta-miR-186	NM_001195045	3215	3222	97	ENSG00000137693	YAP1
bta-miR-186	NM_001195045	3378	3384	98	ENSG00000137693	YAP1
bta-miR-186	NM_001195102	503	510	96	ENSG00000104687	GSR
bta-miR-186	NM_001195103	503	510	96	ENSG00000104687	GSR
bta-miR-186	NM_001195104	503	510	96	ENSG00000104687	GSR
bta-miR-2285e	NM_001195260	281	288	95	ENSG00000178104	PDE4DIP
bta-miR-2285c	NM_001195260	281	288	95	ENSG00000178104	PDE4DIP
bta-miR-2285e	NM_001195261	281	288	95	ENSG00000178104	PDE4DIP
bta-miR-2285c	NM_001195261	281	288	95	ENSG00000178104	PDE4DIP
bta-miR-148a	NM_001195522	37	44	98	ENSG00000238205	MPC1L
bta-miR-2285c	NM_001195622	461	468	97	ENSG00000197579	TOPORS
bta-miR-2285e	NM_001195622	461	468	97	ENSG00000197579	TOPORS
bta-miR-148a	NM_001195626	177	184	98	ENSG00000078403	MLLT10
bta-miR-186	NM_001195728	9179	9186	99	ENSG00000110436	SLC1A2
bta-miR-186	NM_001197079	175	181	96	ENSG00000006652	IFRD1
bta-miR-186	NM_001197080	175	181	96	ENSG00000006652	IFRD1
bta-miR-14-10137	NM_001197104	4670	4677	99	ENSG00000118058	KMT2A
bta-miR-200a	NM_001197104	4471	4478	96	ENSG00000118058	KMT2A
bta-miR-141	NM_001197104	4471	4478	96	ENSG00000118058	KMT2A
bta-miR-3-34194	NM_001197104	4670	4677	99	ENSG00000118058	KMT2A
bta-miR-141	NM_001197107	94	101	98	ENSG00000283245	SCHIP1
bta-miR-200a	NM_001197107	94	101	98	ENSG00000283245	SCHIP1
bta-miR-141	NM_001197108	94	101	98	ENSG00000283245	SCHIP1
bta-miR-200a	NM_001197108	94	101	98	ENSG00000283245	SCHIP1
bta-miR-200a	NM_001197109	94	101	98	ENSG00000151967	SCHIP1
bta-miR-141	NM_001197109	94	101	98	ENSG00000151967	SCHIP1
bta-miR-141	NM_001197113	94	101	98	ENSG00000283154	IQCJ-SCHIP1
bta-miR-200a	NM_001197113	94	101	98	ENSG00000283154	IQCJ-SCHIP1
bta-miR-141	NM_001197114	94	101	98	ENSG00000283154	IQCJ-SCHIP1
bta-miR-200a	NM_001197114	94	101	98	ENSG00000283154	IQCJ-SCHIP1
bta-miR-14-10137	NM_001198801	847	854	97	ENSG00000075151	EIF4G3
bta-miR-3-34194	NM_001198801	847	854	97	ENSG00000075151	EIF4G3
bta-miR-3-34194	NM_001198802	847	854	97	ENSG00000075151	EIF4G3
bta-miR-14-10137	NM_001198802	847	854	97	ENSG00000075151	EIF4G3
bta-miR-186	NM_001199080	855	861	97	ENSG00000174348	PODN
bta-miR-186	NM_001199081	855	861	97	ENSG00000174348	PODN
bta-miR-186	NM_001199082	855	861	97	ENSG00000174348	PODN
bta-miR-2285e	NM_001199086	150	157	95	ENSG00000185013	NT5C1B
bta-miR-2285e	NM_001199087	150	157	95	ENSG00000185013	NT5C1B
bta-miR-2285e	NM_001199088	150	157	95	ENSG00000185013	NT5C1B
bta-miR-200a	NM_001199107	3307	3314	98	ENSG00000162065	TBC1D24
bta-miR-141	NM_001199107	3307	3314	98	ENSG00000162065	TBC1D24
bta-miR-3-34194	NM_001199328	368	375	95	ENSG00000254685	FPGT
bta-miR-14-10137	NM_001199328	368	375	95	ENSG00000254685	FPGT
bta-miR-6522	NM_001199434	1090	1097	99	ENSG00000132603	NIP7
bta-miR-12-6501	NM_001199492	69	75	95	ENSG00000150593	PDCD4
bta-miR-13-7336	NM_001199492	69	75	95	ENSG00000150593	PDCD4
bta-miR-200a	NM_001199679	115	121	96	ENSG00000152078	TMEM56
bta-miR-141	NM_001199679	115	121	96	ENSG00000152078	TMEM56
bta-miR-3-34194	NM_001199741	375	382	97	ENSG00000116717	GADD45A
bta-miR-148a	NM_001199741	32	39	99	ENSG00000116717	GADD45A
bta-miR-14-10137	NM_001199741	375	382	97	ENSG00000116717	GADD45A
bta-miR-3-34194	NM_001199742	452	459	97	ENSG00000116717	GADD45A
bta-miR-14-10137	NM_001199742	452	459	97	ENSG00000116717	GADD45A
bta-miR-148a	NM_001199742	109	116	98	ENSG00000116717	GADD45A
bta-miR-186	NM_001199772	175	181	95	ENSG00000143106	PSMA5
bta-miR-186	NM_001199773	175	181	95	ENSG00000143106	PSMA5
bta-miR-186	NM_001199774	175	181	95	ENSG00000143106	PSMA5
bta-miR-13-7336	NM_001199775	510	517	95	ENSG00000108582	CPD
bta-miR-12-6501	NM_001199775	510	517	95	ENSG00000108582	CPD
bta-miR-14-10137	NM_001199786	978	984	97	ENSG00000088832	FKBP1A
bta-miR-3-34194	NM_001199786	978	984	97	ENSG00000088832	FKBP1A
bta-miR-141	NM_001199818	306	312	95	ENSG00000158301	GPRASP2
bta-miR-186	NM_001199875	211	218	97	ENSG00000140264	SERF2
bta-miR-186	NM_001199876	211	218	97	ENSG00000140264	SERF2
bta-miR-186	NM_001199918	78	85	98	ENSG00000013375	PGM3
bta-miR-2285c	NM_001199942	104	110	95	ENSG00000083097	DOPEY1
bta-miR-14-10137	NM_001199942	165	172	97	ENSG00000083097	DOPEY1
bta-miR-3-34194	NM_001199942	165	172	97	ENSG00000083097	DOPEY1
bta-miR-2285e	NM_001199942	104	110	95	ENSG00000083097	DOPEY1
bta-miR-148a	NM_001200051	20	27	95	ENSG00000135838	NPL
bta-miR-148a	NM_001200056	20	27	95	ENSG00000135838	NPL
bta-miR-13-7336	NM_001201329	3557	3563	96	ENSG00000173281	PPP1R3B
bta-miR-186	NM_001201397	2315	2322	97	ENSG00000136160	EDNRB
bta-miR-186	NM_001201397	226	233	97	ENSG00000136160	EDNRB
bta-miR-186	NM_001201478	109	116	99	ENSG00000143486	EIF2D
bta-miR-186	NM_001202423	1209	1215	97	ENSG00000121486	TRMT1L
bta-miR-2285e	NM_001203250	933	940	99	ENSG00000132010	ZNF20
bta-miR-2285c	NM_001203250	933	940	99	ENSG00000132010	ZNF20
bta-miR-141	NM_001204065	1443	1450	99	ENSG00000185046	ANKS1B
bta-miR-200a	NM_001204065	1443	1450	99	ENSG00000185046	ANKS1B
bta-miR-141	NM_001204066	1443	1450	99	ENSG00000185046	ANKS1B
bta-miR-200a	NM_001204066	1443	1450	99	ENSG00000185046	ANKS1B
bta-miR-141	NM_001204067	1443	1450	99	ENSG00000185046	ANKS1B
bta-miR-200a	NM_001204067	1443	1450	99	ENSG00000185046	ANKS1B
bta-miR-141	NM_001204068	1537	1544	99	ENSG00000185046	ANKS1B
bta-miR-200a	NM_001204068	1537	1544	99	ENSG00000185046	ANKS1B
bta-miR-141	NM_001204069	1443	1450	99	ENSG00000185046	ANKS1B
bta-miR-200a	NM_001204069	1443	1450	99	ENSG00000185046	ANKS1B
bta-miR-141	NM_001204070	1443	1450	99	ENSG00000185046	ANKS1B
bta-miR-200a	NM_001204070	1443	1450	99	ENSG00000185046	ANKS1B
bta-miR-200a	NM_001204079	1443	1450	99	ENSG00000185046	ANKS1B
bta-miR-141	NM_001204079	1443	1450	99	ENSG00000185046	ANKS1B
bta-miR-141	NM_001204080	1443	1450	99	ENSG00000185046	ANKS1B
bta-miR-200a	NM_001204080	1443	1450	99	ENSG00000185046	ANKS1B
bta-miR-148a	NM_001204106	4021	4028	97	ENSG00000153094	BCL2L11
bta-miR-148a	NM_001204107	4256	4263	97	ENSG00000153094	BCL2L11
bta-miR-148a	NM_001204108	4117	4124	97	ENSG00000153094	BCL2L11
bta-miR-148a	NM_001204109	4205	4212	97	ENSG00000153094	BCL2L11
bta-miR-148a	NM_001204110	4117	4124	97	ENSG00000153094	BCL2L11
bta-miR-148a	NM_001204111	4106	4113	97	ENSG00000153094	BCL2L11
bta-miR-148a	NM_001204112	4205	4212	97	ENSG00000153094	BCL2L11
bta-miR-186	NM_001204204	2871	2878	96	ENSG00000100003	SEC14L2
bta-miR-186	NM_001204255	2419	2426	97	ENSG00000138760	SCARB2
bta-miR-3-34194	NM_001204364	68	74	95	ENSG00000213185	FAM24B
bta-miR-14-10137	NM_001204364	68	74	95	ENSG00000213185	FAM24B
bta-miR-186	NM_001204384	431	437	98	ENSG00000112715	VEGFA
bta-miR-186	NM_001204385	431	437	98	ENSG00000112715	VEGFA
bta-miR-186	NM_001204401	4434	4441	99	ENSG00000101966	XIAP
bta-miR-186	NM_001204803	2816	2822	98	ENSG00000177119	ANO6
bta-miR-148a	NM_001204872	39	46	99	ENSG00000215440	NPEPL1
bta-miR-148a	NM_001204873	39	46	99	ENSG00000215440	NPEPL1
bta-miR-200a	NM_001205028	488	495	97	ENSG00000111554	MDM1
bta-miR-141	NM_001205028	488	495	97	ENSG00000111554	MDM1
bta-miR-186	NM_001205228	220	227	98	ENSG00000134243	SORT1
bta-miR-13-7336	NM_001206615	3746	3752	96	ENSG00000135373	EHF
bta-miR-12-6501	NM_001206615	3746	3752	96	ENSG00000135373	EHF
bta-miR-13-7336	NM_001206616	3746	3752	96	ENSG00000135373	EHF
bta-miR-12-6501	NM_001206616	3746	3752	96	ENSG00000135373	EHF
bta-miR-14-10137	NM_001206671	4377	4384	99	ENSG00000166405	RIC3
bta-miR-3-34194	NM_001206671	4377	4384	99	ENSG00000166405	RIC3
bta-miR-14-10137	NM_001206672	4377	4384	99	ENSG00000166405	RIC3
bta-miR-3-34194	NM_001206672	4377	4384	99	ENSG00000166405	RIC3
bta-miR-3-34194	NM_001206741	253	260	97	ENSG00000117594	HSD11B1
bta-miR-14-10137	NM_001206741	253	260	97	ENSG00000117594	HSD11B1
bta-miR-200a	NM_001206955	1656	1663	95	ENSG00000144619	CNTN4
bta-miR-148a	NM_001206955	209	216	98	ENSG00000144619	CNTN4
bta-miR-141	NM_001206955	1656	1663	95	ENSG00000144619	CNTN4
bta-miR-141	NM_001206956	1656	1663	95	ENSG00000144619	CNTN4
bta-miR-200a	NM_001206956	1656	1663	95	ENSG00000144619	CNTN4
bta-miR-148a	NM_001206956	209	216	98	ENSG00000144619	CNTN4
bta-miR-186	NM_001220473	184	190	96	ENSG00000139220	PPFIA2
bta-miR-186	NM_001220474	184	190	96	ENSG00000139220	PPFIA2
bta-miR-186	NM_001220475	184	190	96	ENSG00000139220	PPFIA2
bta-miR-186	NM_001220476	184	190	96	ENSG00000139220	PPFIA2
bta-miR-186	NM_001220477	184	190	96	ENSG00000139220	PPFIA2
bta-miR-186	NM_001220478	184	190	96	ENSG00000139220	PPFIA2
bta-miR-186	NM_001220479	184	190	96	ENSG00000139220	PPFIA2
bta-miR-186	NM_001220480	184	190	96	ENSG00000139220	PPFIA2
bta-miR-14-10137	NM_001226	225	232	97	ENSG00000138794	CASP6
bta-miR-3-34194	NM_001226	225	232	97	ENSG00000138794	CASP6
bta-miR-14-10137	NM_001229	588	594	98	ENSG00000132906	CASP9
bta-miR-3-34194	NM_001229	588	594	98	ENSG00000132906	CASP9
bta-miR-141	NM_001229	605	611	95	ENSG00000132906	CASP9
bta-miR-13-7336	NM_001242532	156	163	99	ENSG00000092931	MFSD11
bta-miR-12-6501	NM_001242532	156	163	99	ENSG00000092931	MFSD11
bta-miR-12-6501	NM_001242533	156	163	99	ENSG00000092931	MFSD11
bta-miR-13-7336	NM_001242533	156	163	99	ENSG00000092931	MFSD11
bta-miR-12-6501	NM_001242534	156	163	99	ENSG00000092931	MFSD11
bta-miR-13-7336	NM_001242534	156	163	99	ENSG00000092931	MFSD11
bta-miR-13-7336	NM_001242535	156	163	99	ENSG00000092931	MFSD11
bta-miR-12-6501	NM_001242535	156	163	99	ENSG00000092931	MFSD11
bta-miR-12-6501	NM_001242536	156	163	99	ENSG00000092931	MFSD11
bta-miR-13-7336	NM_001242536	156	163	99	ENSG00000092931	MFSD11
bta-miR-12-6501	NM_001242537	156	163	99	ENSG00000092931	MFSD11
bta-miR-13-7336	NM_001242537	156	163	99	ENSG00000092931	MFSD11
bta-miR-3-34194	NM_001242617	2004	2010	96	ENSG00000101888	NXT2
bta-miR-186	NM_001242617	109	116	99	ENSG00000101888	NXT2
bta-miR-14-10137	NM_001242617	2004	2010	96	ENSG00000101888	NXT2
bta-miR-14-10137	NM_001242618	2004	2010	96	ENSG00000101888	NXT2
bta-miR-186	NM_001242618	109	116	99	ENSG00000101888	NXT2
bta-miR-3-34194	NM_001242618	2004	2010	96	ENSG00000101888	NXT2
bta-miR-14-10137	NM_001242673	1910	1917	98	ENSG00000168710	AHCYL1
bta-miR-3-34194	NM_001242673	1910	1917	98	ENSG00000168710	AHCYL1
bta-miR-14-10137	NM_001242674	1910	1917	98	ENSG00000168710	AHCYL1
bta-miR-3-34194	NM_001242674	1910	1917	98	ENSG00000168710	AHCYL1
bta-miR-3-34194	NM_001242675	1910	1917	98	ENSG00000168710	AHCYL1
bta-miR-14-10137	NM_001242675	1910	1917	98	ENSG00000168710	AHCYL1
bta-miR-14-10137	NM_001242676	1910	1917	98	ENSG00000168710	AHCYL1
bta-miR-3-34194	NM_001242676	1910	1917	98	ENSG00000168710	AHCYL1
bta-miR-2285c	NM_001242894	1416	1423	95	ENSG00000189298	ZKSCAN3
bta-miR-2285e	NM_001242894	1416	1423	95	ENSG00000189298	ZKSCAN3
bta-miR-2285c	NM_001242895	1416	1423	95	ENSG00000189298	ZKSCAN3
bta-miR-2285e	NM_001242895	1416	1423	95	ENSG00000189298	ZKSCAN3
bta-miR-148a	NM_001278	902	909	99	ENSG00000213341	CHUK
bta-miR-2285c	NM_001283	325	332	97	ENSG00000106367	AP1S1
bta-miR-2285e	NM_001283	325	332	97	ENSG00000106367	AP1S1
bta-miR-200a	NM_001297	1157	1164	97	ENSG00000070729	CNGB1
bta-miR-141	NM_001297	1157	1164	97	ENSG00000070729	CNGB1
bta-miR-12-6501	NM_001304	510	517	95	ENSG00000108582	CPD
bta-miR-13-7336	NM_001304	510	517	95	ENSG00000108582	CPD
bta-miR-13-7336	NM_001330	536	543	97	ENSG00000150281	CTF1
bta-miR-12-6501	NM_001330	536	543	97	ENSG00000150281	CTF1
bta-miR-141	NM_001332	859	866	96	ENSG00000169862	CTNND2
bta-miR-12-6501	NM_001334	1661	1668	98	ENSG00000256043	CTSO
bta-miR-12-6501	NM_001334	1661	1668	98	ENSG00000263238	CTSO
bta-miR-13-7336	NM_001334	1661	1668	98	ENSG00000256043	CTSO
bta-miR-13-7336	NM_001334	1661	1668	98	ENSG00000263238	CTSO
bta-miR-148a	NM_001379	48	55	96	ENSG00000130816	DNMT1
bta-miR-148a	NM_001400	277	284	95	ENSG00000170989	S1PR1
bta-miR-200a	NM_001446	58	65	99	ENSG00000164434	FABP7
bta-miR-141	NM_001446	58	65	99	ENSG00000164434	FABP7
bta-miR-6522	NM_001457	1025	1032	95	ENSG00000136068	FLNB
bta-miR-200a	NM_001480	66	73	96	ENSG00000166573	GALR1
bta-miR-141	NM_001480	66	73	96	ENSG00000166573	GALR1
bta-miR-186	NM_001515	61	68	98	ENSG00000145736	GTF2H2
bta-miR-186	NM_001515	61	68	98	ENSG00000276910	GTF2H2
bta-miR-200a	NM_001527	2911	2918	97	ENSG00000196591	HDAC2
bta-miR-141	NM_001527	2911	2918	98	ENSG00000196591	HDAC2
bta-miR-186	NM_001550	175	181	96	ENSG00000006652	IFRD1
bta-miR-3-34194	NM_001567	756	762	96	ENSG00000165458	INPPL1
bta-miR-14-10137	NM_001567	756	762	96	ENSG00000165458	INPPL1
bta-miR-200a	NM_001609	2281	2288	99	ENSG00000196177	ACADSB
bta-miR-141	NM_001609	2281	2288	99	ENSG00000196177	ACADSB
bta-miR-12-6501	NM_001616	66	73	97	ENSG00000121989	ACVR2A
bta-miR-13-7336	NM_001616	66	73	97	ENSG00000121989	ACVR2A
bta-miR-14-10137	NM_001622	308	315	96	ENSG00000145192	AHSG
bta-miR-3-34194	NM_001622	308	315	96	ENSG00000145192	AHSG
bta-miR-148a	NM_001627	266	273	97	ENSG00000170017	ALCAM
bta-miR-200a	NM_001650	4083	4090	97	ENSG00000171885	AQP4
bta-miR-141	NM_001650	4083	4090	97	ENSG00000171885	AQP4
bta-miR-186	NM_001655	1810	1817	97	ENSG00000095139	ARCN1
bta-miR-148a	NM_001660	517	524	95	ENSG00000168374	ARF4
bta-miR-200a	NM_001676	164	170	96	ENSG00000075673	ATP12A
bta-miR-141	NM_001676	164	170	96	ENSG00000075673	ATP12A
bta-miR-2285e	NM_001677	1122	1129	98	ENSG00000143153	ATP1B1
bta-miR-2285c	NM_001677	1122	1129	98	ENSG00000143153	ATP1B1
bta-miR-148a	NM_001684	4180	4187	97	ENSG00000058668	ATP2B4
bta-miR-141	NM_001690	2069	2076	97	ENSG00000114573	ATP6V1A
bta-miR-200a	NM_001690	2069	2076	97	ENSG00000114573	ATP6V1A
bta-miR-148a	NM_001704	39	46	98	ENSG00000135298	ADGRB3
bta-miR-2285e	NM_001723	38	45	97	ENSG00000151914	DST
bta-miR-2285c	NM_001723	38	45	97	ENSG00000151914	DST
bta-miR-3-34194	NM_001748	411	418	95	ENSG00000162909	CAPN2
bta-miR-14-10137	NM_001748	411	418	95	ENSG00000162909	CAPN2
bta-miR-2285e	NM_001752	532	538	95	ENSG00000121691	CAT
bta-miR-13-7336	NM_001752	533	539	95	ENSG00000121691	CAT
bta-miR-12-6501	NM_001752	533	539	95	ENSG00000121691	CAT
bta-miR-141	NM_001759	5046	5053	98	ENSG00000118971	CCND2
bta-miR-200a	NM_001759	5046	5053	99	ENSG00000118971	CCND2
bta-miR-14-10137	NM_001760	275	282	95	ENSG00000112576	CCND3
bta-miR-3-34194	NM_001760	275	282	95	ENSG00000112576	CCND3
bta-miR-14-10137	NM_001769	370	377	99	ENSG00000010278	CD9
bta-miR-2285e	NM_001769	379	385	97	ENSG00000010278	CD9
bta-miR-2285c	NM_001769	379	385	97	ENSG00000010278	CD9
bta-miR-3-34194	NM_001769	370	377	99	ENSG00000010278	CD9
bta-miR-3-34194	NM_001781	562	568	96	ENSG00000110848	CD69
bta-miR-14-10137	NM_001781	562	568	96	ENSG00000110848	CD69
bta-miR-3-34194	NM_001791	1263	1269	97	ENSG00000070831	CDC42
bta-miR-14-10137	NM_001791	1263	1269	97	ENSG00000070831	CDC42
bta-miR-13-7336	NM_001795	1433	1439	95	ENSG00000179776	CDH5
bta-miR-12-6501	NM_001795	1433	1439	95	ENSG00000179776	CDH5
bta-miR-186	NM_001797	819	825	98	ENSG00000140937	CDH11
bta-miR-186	NM_001809	685	692	99	ENSG00000115163	CENPA
bta-miR-148a	NM_001844	82	89	95	ENSG00000139219	COL2A1
bta-miR-6522	NM_001853	265	272	95	ENSG00000092758	COL9A3
bta-miR-3-34194	NM_001854	1490	1496	96	ENSG00000060718	COL11A1
bta-miR-14-10137	NM_001854	1490	1496	96	ENSG00000060718	COL11A1
bta-miR-2285c	NM_001854	959	966	95	ENSG00000060718	COL11A1
bta-miR-2285e	NM_001854	959	966	95	ENSG00000060718	COL11A1
bta-miR-186	NM_001892	1225	1232	95	ENSG00000113712	CSNK1A1
bta-miR-14-10137	NM_001902	286	293	99	ENSG00000116761	CTH
bta-miR-3-34194	NM_001902	286	293	99	ENSG00000116761	CTH
bta-miR-148a	NM_001924	32	39	99	ENSG00000116717	GADD45A
bta-miR-14-10137	NM_001924	375	382	97	ENSG00000116717	GADD45A
bta-miR-3-34194	NM_001924	375	382	97	ENSG00000116717	GADD45A
bta-miR-141	NM_001938	271	278	97	ENSG00000117505	DR1
bta-miR-14-10137	NM_001938	289	296	98	ENSG00000117505	DR1
bta-miR-2285e	NM_001938	1715	1722	98	ENSG00000117505	DR1
bta-miR-2285c	NM_001938	1715	1722	98	ENSG00000117505	DR1
bta-miR-200a	NM_001938	271	278	97	ENSG00000117505	DR1
bta-miR-3-34194	NM_001938	289	296	98	ENSG00000117505	DR1
bta-miR-186	NM_001941	513	520	96	ENSG00000134762	DSC3
bta-miR-3-34194	NM_001970	640	647	99	ENSG00000132507	EIF5A
bta-miR-14-10137	NM_001970	640	647	99	ENSG00000132507	EIF5A
bta-miR-186	NM_001977	1762	1769	99	ENSG00000138792	ENPEP
bta-miR-200a	NM_001980	312	319	99	ENSG00000111450	STX2
bta-miR-141	NM_001980	312	319	99	ENSG00000111450	STX2
bta-miR-148a	NM_001982	772	779	97	ENSG00000065361	ERBB3
bta-miR-148a	NM_001990	3350	3357	97	ENSG00000158161	EYA3
bta-miR-14-10137	NM_002022	98	105	98	ENSG00000076258	FMO4
bta-miR-3-34194	NM_002022	98	105	98	ENSG00000076258	FMO4
bta-miR-186	NM_002061	110	117	97	ENSG00000023909	GCLM
bta-miR-186	NM_002069	1638	1645	98	ENSG00000127955	GNAI1
bta-miR-200a	NM_002086	1707	1713	97	ENSG00000177885	GRB2
bta-miR-141	NM_002086	1707	1713	97	ENSG00000177885	GRB2
bta-miR-186	NM_002107	27	34	99	ENSG00000163041	H3F3A
bta-miR-12-6501	NM_002114	88	94	95	ENSG00000095951	HIVEP1
bta-miR-2285e	NM_002128	2011	2018	97	ENSG00000189403	HMGB1
bta-miR-2285c	NM_002128	2011	2018	97	ENSG00000189403	HMGB1
bta-miR-2285e	NM_002137	74	81	98	ENSG00000122566	HNRNPA2B1
bta-miR-2285c	NM_002137	74	81	97	ENSG00000122566	HNRNPA2B1
bta-miR-186	NM_002145	345	352	99	ENSG00000173917	HOXB2
bta-miR-6522	NM_002162	46	53	99	ENSG00000076662	ICAM3
bta-miR-148a	NM_002170	99	106	98	ENSG00000120242	IFNA8
bta-miR-148a	NM_002184	237	244	98	ENSG00000134352	IL6ST
bta-miR-148a	NM_002193	668	675	96	ENSG00000163083	INHBB
bta-miR-186	NM_002194	187	194	95	ENSG00000151689	INPP1
bta-miR-186	NM_002196	647	654	98	ENSG00000173404	INSM1
bta-miR-141	NM_002243	1255	1262	98	ENSG00000157551	KCNJ15
bta-miR-200a	NM_002243	1255	1262	98	ENSG00000157551	KCNJ15
bta-miR-200a	NM_002267	2311	2317	95	ENSG00000102753	KPNA3
bta-miR-186	NM_002294	128	135	95	ENSG00000005893	LAMP2
bta-miR-3-34194	NM_002296	1808	1814	98	ENSG00000143815	LBR
bta-miR-14-10137	NM_002296	1808	1814	98	ENSG00000143815	LBR
bta-miR-148a	NM_002296	94	101	99	ENSG00000143815	LBR
bta-miR-148a	NM_002296	278	285	99	ENSG00000143815	LBR
bta-miR-12-6501	NM_002310	6143	6150	97	ENSG00000113594	LIFR
bta-miR-13-7336	NM_002310	6143	6150	96	ENSG00000113594	LIFR
bta-miR-141	NM_002338	7633	7640	99	ENSG00000185565	LSAMP
bta-miR-200a	NM_002338	7633	7640	99	ENSG00000185565	LSAMP
bta-miR-200a	NM_002349	947	953	95	ENSG00000054219	LY75
bta-miR-141	NM_002349	947	953	95	ENSG00000054219	LY75
bta-miR-148a	NM_002349	24	31	99	ENSG00000054219	LY75
bta-miR-2285e	NM_002372	272	279	97	ENSG00000112893	MAN2A1
bta-miR-2285c	NM_002372	272	279	97	ENSG00000112893	MAN2A1
bta-miR-13-7336	NM_002376	452	459	98	ENSG00000075413	MARK3
bta-miR-12-6501	NM_002376	452	459	98	ENSG00000075413	MARK3
bta-miR-13-7336	NM_002403	332	338	97	ENSG00000117122	MFAP2
bta-miR-12-6501	NM_002403	332	338	97	ENSG00000117122	MFAP2
bta-miR-12-6501	NM_002421	361	368	97	ENSG00000196611	MMP1
bta-miR-13-7336	NM_002421	361	368	95	ENSG00000196611	MMP1
bta-miR-148a	NM_002428	1407	1414	98	ENSG00000102996	MMP15
bta-miR-148a	NM_002474	523	530	99	ENSG00000133392	MYH11
bta-miR-148a	NM_002474	523	530	99	ENSG00000276480	MYH11
bta-miR-141	NM_002485	435	442	98	ENSG00000104320	NBN
bta-miR-200a	NM_002485	435	442	98	ENSG00000104320	NBN
bta-miR-186	NM_002514	1169	1175	99	ENSG00000136999	NOV
bta-miR-3-34194	NM_002564	18	25	97	ENSG00000175591	P2RY2
bta-miR-14-10137	NM_002564	18	25	97	ENSG00000175591	P2RY2
bta-miR-186	NM_002577	71	77	96	ENSG00000180370	PAK2
bta-miR-186	NM_002577	3734	3740	96	ENSG00000180370	PAK2
bta-miR-186	NM_002613	4913	4919	96	ENSG00000140992	PDPK1
bta-miR-186	NM_002645	2479	2485	95	ENSG00000011405	PIK3C2A
bta-miR-148a	NM_002645	2399	2406	95	ENSG00000011405	PIK3C2A
bta-miR-141	NM_002655	5292	5299	97	ENSG00000181690	PLAG1
bta-miR-200a	NM_002655	5292	5299	97	ENSG00000181690	PLAG1
bta-miR-200a	NM_002664	1510	1517	99	ENSG00000115956	PLEK
bta-miR-141	NM_002664	1510	1517	99	ENSG00000115956	PLEK
bta-miR-186	NM_002709	3334	3341	98	ENSG00000213639	PPP1CB
bta-miR-148a	NM_002729	126	133	96	ENSG00000152804	HHEX
bta-miR-186	NM_002734	2213	2220	99	ENSG00000108946	PRKAR1A
bta-miR-12-6501	NM_002737	5575	5582	96	ENSG00000154229	PRKCA
bta-miR-12-6501	NM_002742	55	62	98	ENSG00000184304	PRKD1
bta-miR-13-7336	NM_002742	55	62	98	ENSG00000184304	PRKD1
bta-miR-3-34194	NM_002765	309	316	97	ENSG00000101911	PRPS2
bta-miR-14-10137	NM_002765	309	316	97	ENSG00000101911	PRPS2
bta-miR-3-34194	NM_002772	591	598	97	ENSG00000154646	TMPRSS15
bta-miR-14-10137	NM_002772	591	598	97	ENSG00000154646	TMPRSS15
bta-miR-186	NM_002790	175	181	95	ENSG00000143106	PSMA5
bta-miR-186	NM_002796	74	80	98	ENSG00000159377	PSMB4
bta-miR-3-34194	NM_002814	661	667	95	ENSG00000101843	PSMD10
bta-miR-14-10137	NM_002814	661	667	95	ENSG00000101843	PSMD10
bta-miR-141	NM_002834	251	258	97	ENSG00000179295	PTPN11
bta-miR-200a	NM_002834	251	258	97	ENSG00000179295	PTPN11
bta-miR-200a	NM_002839	3682	3689	99	ENSG00000153707	PTPRD
bta-miR-141	NM_002839	3682	3689	99	ENSG00000153707	PTPRD
bta-miR-186	NM_002863	59	66	97	ENSG00000100504	PYGL
bta-miR-13-7336	NM_002897	218	225	98	ENSG00000153250	RBMS1
bta-miR-12-6501	NM_002897	218	225	98	ENSG00000153250	RBMS1
bta-miR-200a	NM_002919	748	755	97	ENSG00000080298	RFX3
bta-miR-141	NM_002919	748	755	97	ENSG00000080298	RFX3
bta-miR-13-7336	NM_002940	77	83	95	ENSG00000164163	ABCE1
bta-miR-2285e	NM_002940	76	82	96	ENSG00000164163	ABCE1
bta-miR-2285c	NM_002940	76	82	96	ENSG00000164163	ABCE1
bta-miR-12-6501	NM_002940	77	83	96	ENSG00000164163	ABCE1
bta-miR-186	NM_002956	1457	1463	98	ENSG00000130779	CLIP1
bta-miR-186	NM_002959	220	227	98	ENSG00000134243	SORT1
bta-miR-186	NM_002977	2992	2999	98	ENSG00000169432	SCN9A
bta-miR-12-6501	NM_003043	60	67	96	ENSG00000131389	SLC6A6
bta-miR-13-7336	NM_003043	60	67	95	ENSG00000131389	SLC6A6
bta-miR-186	NM_003093	204	210	97	ENSG00000124562	SNRPC
bta-miR-13-7336	NM_003107	1595	1602	96	ENSG00000124766	SOX4
bta-miR-12-6501	NM_003107	1595	1602	97	ENSG00000124766	SOX4
bta-miR-186	NM_003137	2191	2197	95	ENSG00000096063	SRPK1
bta-miR-200a	NM_003151	232	239	99	ENSG00000138378	STAT4
bta-miR-141	NM_003151	232	239	99	ENSG00000138378	STAT4
bta-miR-141	NM_003162	504	511	96	ENSG00000115808	STRN
bta-miR-200a	NM_003162	504	511	96	ENSG00000115808	STRN
bta-miR-186	NM_003176	324	331	98	ENSG00000198765	SYCP1
bta-miR-14-10137	NM_003206	412	418	96	ENSG00000118526	TCF21
bta-miR-3-34194	NM_003206	412	418	96	ENSG00000118526	TCF21
bta-miR-186	NM_003211	1563	1570	98	ENSG00000139372	TDG
bta-miR-12-6501	NM_003217	1819	1825	95	ENSG00000139644	TMBIM6
bta-miR-186	NM_003218	160	167	95	ENSG00000147601	TERF1
bta-miR-148a	NM_003236	3374	3381	99	ENSG00000163235	TGFA
bta-miR-141	NM_003238	105	112	99	ENSG00000092969	TGFB2
bta-miR-200a	NM_003238	105	112	99	ENSG00000092969	TGFB2
bta-miR-186	NM_003242	2152	2158	95	ENSG00000163513	TGFBR2
bta-miR-186	NM_003288	495	502	97	ENSG00000101150	TPD52L2
bta-miR-13-7336	NM_003298	4987	4994	97	ENSG00000177463	NR2C2
bta-miR-12-6501	NM_003298	4987	4994	97	ENSG00000177463	NR2C2
bta-miR-186	NM_003317	861	867	96	ENSG00000136352	NKX2-1
bta-miR-3-34194	NM_003319	929	936	98	ENSG00000155657	TTN
bta-miR-14-10137	NM_003319	929	936	98	ENSG00000155657	TTN
bta-miR-186	NM_003328	226	233	95	ENSG00000074966	TXK
bta-miR-148a	NM_003356	189	196	97	ENSG00000175564	UCP3
bta-miR-186	NM_003359	1012	1019	99	ENSG00000109814	UGDH
bta-miR-186	NM_003376	431	437	98	ENSG00000112715	VEGFA
bta-miR-3-34194	NM_003385	971	978	99	ENSG00000163032	VSNL1
bta-miR-14-10137	NM_003385	971	978	99	ENSG00000163032	VSNL1
bta-miR-186	NM_003403	300	307	98	ENSG00000100811	YY1
bta-miR-148a	NM_003404	1489	1496	97	ENSG00000166913	YWHAB
bta-miR-12-6501	NM_003406	101	108	99	ENSG00000164924	YWHAZ
bta-miR-13-7336	NM_003406	101	108	99	ENSG00000164924	YWHAZ
bta-miR-3-34194	NM_003425	619	626	97	ENSG00000124459	ZNF45
bta-miR-14-10137	NM_003425	619	626	97	ENSG00000124459	ZNF45
bta-miR-186	NM_003453	206	212	98	ENSG00000121741	ZMYM2
bta-miR-12-6501	NM_003453	77	84	98	ENSG00000121741	ZMYM2
bta-miR-13-7336	NM_003453	77	84	98	ENSG00000121741	ZMYM2
bta-miR-14-10137	NM_003458	3896	3903	98	ENSG00000164061	BSN
bta-miR-3-34194	NM_003458	3896	3903	98	ENSG00000164061	BSN
bta-miR-2285e	NM_003463	169	176	98	ENSG00000112245	PTP4A1
bta-miR-2285c	NM_003463	169	176	98	ENSG00000112245	PTP4A1
bta-miR-148a	NM_003473	155	162	98	ENSG00000136738	STAM
bta-miR-3-34194	NM_003477	860	867	99	ENSG00000110435	PDHX
bta-miR-14-10137	NM_003477	860	867	99	ENSG00000110435	PDHX
bta-miR-186	NM_003489	261	267	96	ENSG00000180530	NRIP1
bta-miR-3-34194	NM_003503	336	343	96	ENSG00000097046	CDC7
bta-miR-14-10137	NM_003503	336	343	96	ENSG00000097046	CDC7
bta-miR-3-34194	NM_003589	978	985	95	ENSG00000139842	CUL4A
bta-miR-14-10137	NM_003589	978	985	95	ENSG00000139842	CUL4A
bta-miR-3-34194	NM_003599	81	88	98	ENSG00000196284	SUPT3H
bta-miR-14-10137	NM_003599	81	88	98	ENSG00000196284	SUPT3H
bta-miR-200a	NM_003604	66	73	97	ENSG00000133124	IRS4
bta-miR-141	NM_003604	66	73	97	ENSG00000133124	IRS4
bta-miR-186	NM_003625	184	190	96	ENSG00000139220	PPFIA2
bta-miR-186	NM_003628	124	130	95	ENSG00000144283	PKP4
bta-miR-3-34194	NM_003671	121	128	97	ENSG00000081377	CDC14B
bta-miR-14-10137	NM_003671	121	128	97	ENSG00000081377	CDC14B
bta-miR-200a	NM_003672	312	319	98	ENSG00000079335	CDC14A
bta-miR-148a	NM_003672	192	199	99	ENSG00000079335	CDC14A
bta-miR-141	NM_003672	312	319	99	ENSG00000079335	CDC14A
bta-miR-14-10137	NM_003679	138	145	97	ENSG00000117009	KMO
bta-miR-3-34194	NM_003679	138	145	97	ENSG00000117009	KMO
bta-miR-186	NM_003705	115	121	96	ENSG00000115840	SLC25A12
bta-miR-14-10137	NM_003713	1556	1563	99	ENSG00000162407	PLPP3
bta-miR-3-34194	NM_003713	1556	1563	99	ENSG00000162407	PLPP3
bta-miR-186	NM_003729	251	257	95	ENSG00000137996	RTCA
bta-miR-186	NM_003750	786	793	97	ENSG00000107581	EIF3A
bta-miR-186	NM_003750	93	100	95	ENSG00000107581	EIF3A
bta-miR-3-34194	NM_003760	847	854	97	ENSG00000075151	EIF4G3
bta-miR-14-10137	NM_003760	847	854	97	ENSG00000075151	EIF4G3
bta-miR-141	NM_003819	208	215	97	ENSG00000090621	PABPC4
bta-miR-200a	NM_003819	208	215	98	ENSG00000090621	PABPC4
bta-miR-3-34194	NM_003838	368	375	95	ENSG00000254685	FPGT
bta-miR-14-10137	NM_003838	368	375	95	ENSG00000254685	FPGT
bta-miR-3-34194	NM_003848	130	136	97	ENSG00000172340	SUCLG2
bta-miR-14-10137	NM_003848	130	136	97	ENSG00000172340	SUCLG2
bta-miR-186	NM_003850	350	357	98	ENSG00000136143	SUCLA2
bta-miR-141	NM_003866	570	577	98	ENSG00000109452	INPP4B
bta-miR-200a	NM_003866	570	577	99	ENSG00000109452	INPP4B
bta-miR-148a	NM_003873	2099	2106	98	ENSG00000099250	NRP1
bta-miR-148a	NM_003885	2745	2752	99	ENSG00000176749	CDK5R1
bta-miR-148a	NM_003895	95	102	97	ENSG00000159082	SYNJ1
bta-miR-141	NM_003896	868	875	95	ENSG00000115525	ST3GAL5
bta-miR-200a	NM_003896	868	875	96	ENSG00000115525	ST3GAL5
bta-miR-13-7336	NM_003908	52	59	96	ENSG00000125977	EIF2S2
bta-miR-12-6501	NM_003908	52	59	96	ENSG00000125977	EIF2S2
bta-miR-186	NM_003934	396	403	96	ENSG00000107164	FUBP3
bta-miR-186	NM_003942	165	171	95	ENSG00000162302	RPS6KA4
bta-miR-200a	NM_003971	184	191	96	ENSG00000008294	SPAG9
bta-miR-141	NM_003971	184	191	97	ENSG00000008294	SPAG9
bta-miR-186	NM_003991	755	762	97	ENSG00000136160	EDNRB
bta-miR-12-6501	NM_003994	4278	4284	95	ENSG00000049130	KITLG
bta-miR-13-7336	NM_003994	4278	4284	95	ENSG00000049130	KITLG
bta-miR-186	NM_003999	1345	1352	99	ENSG00000145623	OSMR
bta-miR-141	NM_004028	4083	4090	97	ENSG00000171885	AQP4
bta-miR-200a	NM_004028	4083	4090	97	ENSG00000171885	AQP4
bta-miR-148a	NM_004055	105	112	95	ENSG00000149260	CAPN5
bta-miR-141	NM_004060	1111	1118	99	ENSG00000113328	CCNG1
bta-miR-200a	NM_004060	1111	1118	99	ENSG00000113328	CCNG1
bta-miR-2285c	NM_004088	37	44	99	ENSG00000107447	DNTT
bta-miR-2285e	NM_004088	37	44	99	ENSG00000107447	DNTT
bta-miR-186	NM_004161	1366	1373	95	ENSG00000138069	RAB1A
bta-miR-13-7336	NM_004161	334	341	96	ENSG00000138069	RAB1A
bta-miR-12-6501	NM_004161	334	341	95	ENSG00000138069	RAB1A
bta-miR-186	NM_004171	9179	9186	99	ENSG00000110436	SLC1A2
bta-miR-2285e	NM_004189	623	630	97	ENSG00000168875	SOX14
bta-miR-2285c	NM_004189	623	630	97	ENSG00000168875	SOX14
bta-miR-186	NM_004218	689	696	95	ENSG00000185236	RAB11B
bta-miR-186	NM_004219	69	75	97	ENSG00000164611	PTTG1
bta-miR-14-10137	NM_004226	436	443	98	ENSG00000081320	STK17B
bta-miR-3-34194	NM_004226	436	443	98	ENSG00000081320	STK17B
bta-miR-14-10137	NM_004229	2216	2222	97	ENSG00000180182	MED14
bta-miR-3-34194	NM_004229	2216	2222	97	ENSG00000180182	MED14
bta-miR-186	NM_004267	551	557	99	ENSG00000175040	CHST2
bta-miR-13-7336	NM_004280	288	295	99	ENSG00000124802	EEF1E1
bta-miR-2285e	NM_004280	287	293	97	ENSG00000124802	EEF1E1
bta-miR-12-6501	NM_004280	288	295	99	ENSG00000124802	EEF1E1
bta-miR-2285c	NM_004280	287	293	97	ENSG00000124802	EEF1E1
bta-miR-186	NM_004286	270	276	95	ENSG00000100226	GTPBP1
bta-miR-141	NM_004294	439	446	97	ENSG00000120662	MTRF1
bta-miR-200a	NM_004294	439	446	97	ENSG00000120662	MTRF1
bta-miR-148a	NM_004299	46	53	99	ENSG00000131269	ABCB7
bta-miR-141	NM_004307	127	134	97	ENSG00000163697	APBB2
bta-miR-200a	NM_004307	127	134	98	ENSG00000163697	APBB2
bta-miR-186	NM_004329	189	196	96	ENSG00000107779	BMPR1A
bta-miR-2285c	NM_004354	2789	2796	99	ENSG00000138764	CCNG2
bta-miR-2285e	NM_004354	2789	2796	99	ENSG00000138764	CCNG2
bta-miR-141	NM_004358	539	546	96	ENSG00000101224	CDC25B
bta-miR-2285e	NM_004384	2230	2237	97	ENSG00000151292	CSNK1G3
bta-miR-2285c	NM_004384	2230	2237	97	ENSG00000151292	CSNK1G3
bta-miR-186	NM_004407	708	714	95	ENSG00000152592	DMP1
bta-miR-148a	NM_004409	640	647	95	ENSG00000104936	DMPK
bta-miR-3-34194	NM_004412	274	281	97	ENSG00000107614	TRDMT1
bta-miR-186	NM_004412	63	69	97	ENSG00000107614	TRDMT1
bta-miR-14-10137	NM_004412	274	281	97	ENSG00000107614	TRDMT1
bta-miR-2285c	NM_004423	2291	2298	96	ENSG00000161202	DVL3
bta-miR-141	NM_004431	721	728	99	ENSG00000142627	EPHA2
bta-miR-200a	NM_004431	721	728	98	ENSG00000142627	EPHA2
bta-miR-2285e	NM_004459	86	93	97	ENSG00000171634	BPTF
bta-miR-2285c	NM_004459	86	93	97	ENSG00000171634	BPTF
bta-miR-186	NM_004482	33	39	98	ENSG00000115339	GALNT3
bta-miR-14-10137	NM_004485	312	319	98	ENSG00000168243	GNG4
bta-miR-3-34194	NM_004485	312	319	98	ENSG00000168243	GNG4
bta-miR-200a	NM_004496	1112	1119	97	ENSG00000129514	FOXA1
bta-miR-141	NM_004496	1112	1119	97	ENSG00000129514	FOXA1
bta-miR-13-7336	NM_004498	83	90	98	ENSG00000169856	ONECUT1
bta-miR-12-6501	NM_004498	83	90	98	ENSG00000169856	ONECUT1
bta-miR-148a	NM_004505	1826	1833	98	ENSG00000129204	USP6
bta-miR-148a	NM_004525	225	232	98	ENSG00000081479	LRP2
bta-miR-13-7336	NM_004538	46	53	99	ENSG00000186310	NAP1L3
bta-miR-12-6501	NM_004538	46	53	99	ENSG00000186310	NAP1L3
bta-miR-2285c	NM_004540	442	449	98	ENSG00000154654	NCAM2
bta-miR-2285e	NM_004540	442	449	98	ENSG00000154654	NCAM2
bta-miR-186	NM_004571	216	223	98	ENSG00000160199	PKNOX1
bta-miR-3-34194	NM_004575	404	411	96	ENSG00000151615	POU4F2
bta-miR-14-10137	NM_004575	404	411	96	ENSG00000151615	POU4F2
bta-miR-2285e	NM_004577	27	34	99	ENSG00000146733	PSPH
bta-miR-2285c	NM_004577	27	34	99	ENSG00000146733	PSPH
bta-miR-186	NM_004580	179	186	97	ENSG00000069974	RAB27A
bta-miR-148a	NM_004595	206	213	97	ENSG00000102172	SMS
bta-miR-186	NM_004600	1076	1082	97	ENSG00000116747	TROVE2
bta-miR-2285e	NM_004621	183	190	99	ENSG00000137672	TRPC6
bta-miR-2285c	NM_004621	183	190	99	ENSG00000137672	TRPC6
bta-miR-148a	NM_004641	224	231	97	ENSG00000078403	MLLT10
bta-miR-141	NM_004657	1420	1427	98	ENSG00000168497	SDPR
bta-miR-200a	NM_004657	1420	1427	98	ENSG00000168497	SDPR
bta-miR-186	NM_004688	100	107	99	ENSG00000123609	NMI
bta-miR-186	NM_004719	2612	2618	98	ENSG00000139218	SCAF11
bta-miR-3-34194	NM_004731	494	501	96	ENSG00000118596	SLC16A7
bta-miR-14-10137	NM_004731	494	501	96	ENSG00000118596	SLC16A7
bta-miR-2285e	NM_004771	84	91	97	ENSG00000137674	MMP20
bta-miR-2285c	NM_004771	84	91	97	ENSG00000137674	MMP20
bta-miR-141	NM_004773	258	265	98	ENSG00000273611	ZNHIT3
bta-miR-141	NM_004773	258	265	98	ENSG00000278574	ZNHIT3
bta-miR-200a	NM_004773	258	265	98	ENSG00000273611	ZNHIT3
bta-miR-200a	NM_004773	258	265	98	ENSG00000278574	ZNHIT3
bta-miR-148a	NM_004775	3011	3018	99	ENSG00000118276	B4GALT6
bta-miR-148a	NM_004776	2859	2866	99	ENSG00000158470	B4GALT5
bta-miR-141	NM_004784	2440	2446	95	ENSG00000164100	NDST3
bta-miR-200a	NM_004784	2440	2446	96	ENSG00000164100	NDST3
bta-miR-13-7336	NM_004871	2739	2746	97	ENSG00000108587	GOSR1
bta-miR-12-6501	NM_004871	2739	2746	98	ENSG00000108587	GOSR1
bta-miR-200a	NM_004879	949	956	98	ENSG00000149547	EI24
bta-miR-141	NM_004879	949	956	98	ENSG00000149547	EI24
bta-miR-141	NM_004887	924	931	96	ENSG00000145824	CXCL14
bta-miR-200a	NM_004887	924	931	96	ENSG00000145824	CXCL14
bta-miR-12-6501	NM_004901	489	496	97	ENSG00000197217	ENTPD4
bta-miR-13-7336	NM_004901	489	496	98	ENSG00000197217	ENTPD4
bta-miR-200a	NM_004906	462	469	97	ENSG00000146457	WTAP
bta-miR-2285e	NM_004906	209	216	96	ENSG00000146457	WTAP
bta-miR-141	NM_004906	462	469	97	ENSG00000146457	WTAP
bta-miR-2285c	NM_004906	209	216	96	ENSG00000146457	WTAP
bta-miR-186	NM_004946	383	389	97	ENSG00000134516	DOCK2
bta-miR-3-34194	NM_004950	269	275	96	ENSG00000083782	EPYC
bta-miR-14-10137	NM_004950	269	275	96	ENSG00000083782	EPYC
bta-miR-200a	NM_004966	138	144	95	ENSG00000169813	HNRNPF
bta-miR-186	NM_004994	183	190	96	ENSG00000100985	MMP9
bta-miR-141	NM_004998	842	849	97	ENSG00000157483	MYO1E
bta-miR-200a	NM_004998	842	849	97	ENSG00000157483	MYO1E
bta-miR-186	NM_005047	479	485	95	ENSG00000095261	PSMD5
bta-miR-148a	NM_005087	428	435	97	ENSG00000114416	FXR1
bta-miR-148a	NM_005105	3021	3028	96	ENSG00000265241	RBM8A
bta-miR-14-10137	NM_005154	233	239	95	ENSG00000138592	USP8
bta-miR-3-34194	NM_005154	233	239	95	ENSG00000138592	USP8
bta-miR-141	NM_005158	7395	7402	98	ENSG00000143322	ABL2
bta-miR-200a	NM_005158	7395	7402	98	ENSG00000143322	ABL2
bta-miR-148a	NM_005182	619	626	98	ENSG00000168748	CA7
bta-miR-200a	NM_005188	7438	7445	98	ENSG00000110395	CBL
bta-miR-141	NM_005188	7438	7445	98	ENSG00000110395	CBL
bta-miR-186	NM_005197	94	100	96	ENSG00000053254	FOXN3
bta-miR-12-6501	NM_005259	596	603	95	ENSG00000138379	MSTN
bta-miR-186	NM_005260	254	260	97	ENSG00000164404	GDF9
bta-miR-14-10137	NM_005261	1030	1036	97	ENSG00000164949	GEM
bta-miR-3-34194	NM_005261	1030	1036	97	ENSG00000164949	GEM
bta-miR-186	NM_005302	474	481	99	ENSG00000170775	GPR37
bta-miR-200a	NM_005311	2671	2677	96	ENSG00000106070	GRB10
bta-miR-141	NM_005311	2671	2677	96	ENSG00000106070	GRB10
bta-miR-148a	NM_005311	2386	2393	95	ENSG00000106070	GRB10
bta-miR-148a	NM_005316	648	655	95	ENSG00000110768	GTF2H1
bta-miR-13-7336	NM_005333	1284	1290	96	ENSG00000004961	HCCS
bta-miR-12-6501	NM_005333	1284	1290	96	ENSG00000004961	HCCS
bta-miR-12-6501	NM_005367	170	177	99	ENSG00000213401	MAGEA12
bta-miR-13-7336	NM_005367	170	177	98	ENSG00000213401	MAGEA12
bta-miR-2285c	NM_005369	802	808	96	ENSG00000101977	MCF2
bta-miR-2285e	NM_005369	802	808	96	ENSG00000101977	MCF2
bta-miR-2285e	NM_005369	109	116	99	ENSG00000101977	MCF2
bta-miR-2285c	NM_005369	109	116	99	ENSG00000101977	MCF2
bta-miR-200a	NM_005388	1701	1707	95	ENSG00000136940	PDCL
bta-miR-141	NM_005388	1701	1707	96	ENSG00000136940	PDCL
bta-miR-148a	NM_005402	139	146	97	ENSG00000006451	RALA
bta-miR-148a	NM_005430	697	704	96	ENSG00000125084	WNT1
bta-miR-186	NM_005433	2491	2497	98	ENSG00000176105	YES1
bta-miR-148a	NM_005436	106	113	98	ENSG00000108091	CCDC6
bta-miR-200a	NM_005441	302	309	95	ENSG00000159259	CHAF1B
bta-miR-141	NM_005441	302	309	96	ENSG00000159259	CHAF1B
bta-miR-186	NM_005450	616	623	99	ENSG00000183691	NOG
bta-miR-148a	NM_005461	1611	1618	95	ENSG00000204103	MAFB
bta-miR-186	NM_005466	117	124	96	ENSG00000133997	MED6
bta-miR-12-6501	NM_005477	56	63	98	ENSG00000138622	HCN4
bta-miR-13-7336	NM_005477	56	63	99	ENSG00000138622	HCN4
bta-miR-186	NM_005486	593	600	99	ENSG00000141198	TOM1L1
bta-miR-13-7336	NM_005486	541	548	97	ENSG00000141198	TOM1L1
bta-miR-12-6501	NM_005486	541	548	97	ENSG00000141198	TOM1L1
bta-miR-14-10137	NM_005496	148	155	99	ENSG00000113810	SMC4
bta-miR-3-34194	NM_005496	148	155	99	ENSG00000113810	SMC4
bta-miR-2285c	NM_005499	593	600	99	ENSG00000126261	UBA2
bta-miR-2285e	NM_005499	593	600	99	ENSG00000126261	UBA2
bta-miR-186	NM_005504	304	311	98	ENSG00000060982	BCAT1
bta-miR-186	NM_005506	2419	2426	97	ENSG00000138760	SCARB2
bta-miR-13-7336	NM_005511	439	446	97	ENSG00000120215	MLANA
bta-miR-12-6501	NM_005511	439	446	97	ENSG00000120215	MLANA
bta-miR-14-10137	NM_005517	66	72	98	ENSG00000198830	HMGN2
bta-miR-3-34194	NM_005517	66	72	98	ENSG00000198830	HMGN2
bta-miR-3-34194	NM_005525	253	260	97	ENSG00000117594	HSD11B1
bta-miR-14-10137	NM_005525	253	260	97	ENSG00000117594	HSD11B1
bta-miR-186	NM_005570	2981	2987	97	ENSG00000074695	LMAN1
bta-miR-186	NM_005605	159	165	97	ENSG00000120910	PPP3CC
bta-miR-186	NM_005637	1384	1391	96	ENSG00000141380	SS18
bta-miR-186	NM_005708	4706	4713	97	ENSG00000183098	GPC6
bta-miR-2285c	NM_005722	2307	2313	95	ENSG00000138071	ACTR2
bta-miR-2285e	NM_005722	2307	2313	95	ENSG00000138071	ACTR2
bta-miR-12-6501	NM_005722	2308	2314	96	ENSG00000138071	ACTR2
bta-miR-3-34194	NM_005724	2851	2857	98	ENSG00000140391	TSPAN3
bta-miR-14-10137	NM_005724	2851	2857	98	ENSG00000140391	TSPAN3
bta-miR-13-7336	NM_005733	55	61	95	ENSG00000112984	KIF20A
bta-miR-186	NM_005744	701	708	95	ENSG00000166233	ARIH1
bta-miR-200a	NM_005748	250	257	96	ENSG00000015153	YAF2
bta-miR-141	NM_005748	250	257	96	ENSG00000015153	YAF2
bta-miR-186	NM_005749	734	741	99	ENSG00000141232	TOB1
bta-miR-2285e	NM_005759	285	292	98	ENSG00000138443	ABI2
bta-miR-2285c	NM_005759	285	292	97	ENSG00000138443	ABI2
bta-miR-148a	NM_005765	340	347	97	ENSG00000182220	ATP6AP2
bta-miR-186	NM_005795	2872	2879	99	ENSG00000064989	CALCRL
bta-miR-14-10137	NM_005801	74	81	98	ENSG00000173812	EIF1
bta-miR-3-34194	NM_005801	74	81	98	ENSG00000173812	EIF1
bta-miR-2285e	NM_005802	461	468	97	ENSG00000197579	TOPORS
bta-miR-2285c	NM_005802	461	468	97	ENSG00000197579	TOPORS
bta-miR-148a	NM_005824	893	900	99	ENSG00000128606	LRRC17
bta-miR-13-7336	NM_005852	1109	1116	98	ENSG00000170004	CHD3
bta-miR-12-6501	NM_005852	1109	1116	99	ENSG00000170004	CHD3
bta-miR-3-34194	NM_005853	392	399	99	ENSG00000176842	IRX5
bta-miR-14-10137	NM_005853	392	399	99	ENSG00000176842	IRX5
bta-miR-186	NM_005868	1174	1181	98	ENSG00000105829	BET1
bta-miR-148a	NM_005899	259	266	96	ENSG00000188554	NBR1
bta-miR-12-6501	NM_005900	391	398	95	ENSG00000170365	SMAD1
bta-miR-13-7336	NM_005900	391	398	95	ENSG00000170365	SMAD1
bta-miR-186	NM_005921	2268	2274	96	ENSG00000095015	MAP3K1
bta-miR-148a	NM_005924	280	287	96	ENSG00000106511	MEOX2
bta-miR-141	NM_005933	4471	4478	96	ENSG00000118058	KMT2A
bta-miR-3-34194	NM_005933	4670	4677	99	ENSG00000118058	KMT2A
bta-miR-14-10137	NM_005933	4670	4677	99	ENSG00000118058	KMT2A
bta-miR-200a	NM_005933	4471	4478	96	ENSG00000118058	KMT2A
bta-miR-12-6501	NM_005938	1194	1201	95	ENSG00000184481	FOXO4
bta-miR-2285e	NM_005943	2439	2446	96	ENSG00000124615	MOCS1
bta-miR-2285c	NM_005943	2439	2446	96	ENSG00000124615	MOCS1
bta-miR-200a	NM_005964	1202	1209	97	ENSG00000133026	MYH10
bta-miR-141	NM_005964	1202	1209	97	ENSG00000133026	MYH10
bta-miR-200a	NM_005969	958	964	95	ENSG00000273562	NAP1L4
bta-miR-200a	NM_005969	958	964	95	ENSG00000205531	NAP1L4
bta-miR-186	NM_005986	2376	2383	98	ENSG00000182968	SOX1
bta-miR-3-34194	NM_006014	403	410	97	ENSG00000196976	LAGE3
bta-miR-14-10137	NM_006014	403	410	97	ENSG00000196976	LAGE3
bta-miR-186	NM_006090	122	128	96	ENSG00000134255	CEPT1
bta-miR-200a	NM_006095	4547	4554	97	ENSG00000124406	ATP8A1
bta-miR-3-34194	NM_006095	4284	4291	97	ENSG00000124406	ATP8A1
bta-miR-14-10137	NM_006095	4284	4291	97	ENSG00000124406	ATP8A1
bta-miR-141	NM_006095	4547	4554	97	ENSG00000124406	ATP8A1
bta-miR-186	NM_006106	3215	3222	97	ENSG00000137693	YAP1
bta-miR-186	NM_006106	3378	3384	98	ENSG00000137693	YAP1
bta-miR-13-7336	NM_006135	116	122	96	ENSG00000116489	CAPZA1
bta-miR-200a	NM_006139	2353	2359	95	ENSG00000178562	CD28
bta-miR-141	NM_006139	2353	2359	95	ENSG00000178562	CD28
bta-miR-186	NM_006216	247	254	95	ENSG00000135919	SERPINE2
bta-miR-148a	NM_006252	27	33	95	ENSG00000162409	PRKAA2
bta-miR-186	NM_006252	48	55	99	ENSG00000162409	PRKAA2
bta-miR-13-7336	NM_006265	1398	1405	99	ENSG00000164754	RAD21
bta-miR-12-6501	NM_006265	1398	1405	99	ENSG00000164754	RAD21
bta-miR-186	NM_006287	368	375	96	ENSG00000003436	TFPI
bta-miR-3-34194	NM_006309	230	237	97	ENSG00000093167	LRRFIP2
bta-miR-14-10137	NM_006309	230	237	97	ENSG00000093167	LRRFIP2
bta-miR-186	NM_006323	331	337	97	ENSG00000138802	SEC24B
bta-miR-200a	NM_006330	96	103	97	ENSG00000120992	LYPLA1
bta-miR-141	NM_006330	96	103	97	ENSG00000120992	LYPLA1
bta-miR-186	NM_006333	543	550	98	ENSG00000197223	C1D
bta-miR-148a	NM_006369	135	142	95	ENSG00000132128	LRRC41
bta-miR-12-6501	NM_006375	637	644	96	ENSG00000165675	ENOX2
bta-miR-13-7336	NM_006375	637	644	95	ENSG00000165675	ENOX2
bta-miR-186	NM_006389	1399	1405	98	ENSG00000280682	HYOU1
bta-miR-186	NM_006389	1399	1405	98	ENSG00000149428	HYOU1
bta-miR-12-6501	NM_006402	199	206	95	ENSG00000134248	LAMTOR5
bta-miR-200a	NM_006416	686	692	95	ENSG00000164414	SLC35A1
bta-miR-141	NM_006416	686	692	95	ENSG00000164414	SLC35A1
bta-miR-141	NM_006419	631	637	96	ENSG00000156234	CXCL13
bta-miR-186	NM_006419	640	647	98	ENSG00000156234	CXCL13
bta-miR-2285c	NM_006421	1249	1256	99	ENSG00000066777	ARFGEF1
bta-miR-2285e	NM_006421	1249	1256	99	ENSG00000066777	ARFGEF1
bta-miR-200a	NM_006444	161	168	98	ENSG00000136824	SMC2
bta-miR-141	NM_006444	161	168	99	ENSG00000136824	SMC2
bta-miR-2285e	NM_006451	36	43	98	ENSG00000172239	PAIP1
bta-miR-2285c	NM_006451	36	43	98	ENSG00000172239	PAIP1
bta-miR-14-10137	NM_006534	3206	3213	99	ENSG00000124151	NCOA3
bta-miR-3-34194	NM_006534	3206	3213	99	ENSG00000124151	NCOA3
bta-miR-148a	NM_006538	4021	4028	97	ENSG00000153094	BCL2L11
bta-miR-200a	NM_006540	1319	1326	97	ENSG00000140396	NCOA2
bta-miR-141	NM_006540	1319	1326	97	ENSG00000140396	NCOA2
bta-miR-200a	NM_006568	82	89	98	ENSG00000100532	CGRRF1
bta-miR-141	NM_006568	82	89	97	ENSG00000100532	CGRRF1
bta-miR-186	NM_006602	825	832	99	ENSG00000101190	TCFL5
bta-miR-14-10137	NM_006608	440	447	99	ENSG00000116793	PHTF1
bta-miR-3-34194	NM_006608	440	447	99	ENSG00000116793	PHTF1
bta-miR-3-34194	NM_006621	1910	1917	98	ENSG00000168710	AHCYL1
bta-miR-14-10137	NM_006621	1910	1917	98	ENSG00000168710	AHCYL1
bta-miR-148a	NM_006628	183	190	97	ENSG00000128989	ARPP19
bta-miR-186	NM_006633	779	785	97	ENSG00000145703	IQGAP2
bta-miR-2285c	NM_006635	223	230	98	ENSG00000197714	ZNF460
bta-miR-2285e	NM_006635	223	230	98	ENSG00000197714	ZNF460
bta-miR-186	NM_006660	354	361	99	ENSG00000166855	CLPX
bta-miR-3-34194	NM_006681	95	101	97	ENSG00000109255	NMU
bta-miR-14-10137	NM_006681	95	101	97	ENSG00000109255	NMU
bta-miR-2285e	NM_006699	2505	2512	96	ENSG00000198162	MAN1A2
bta-miR-2285c	NM_006699	2505	2512	96	ENSG00000198162	MAN1A2
bta-miR-141	NM_006704	382	389	99	ENSG00000165416	SUGT1
bta-miR-200a	NM_006704	382	389	99	ENSG00000165416	SUGT1
bta-miR-141	NM_006706	307	314	95	ENSG00000113649	TCERG1
bta-miR-13-7336	NM_006706	60	66	95	ENSG00000113649	TCERG1
bta-miR-2285c	NM_006710	869	876	98	ENSG00000198612	COPS8
bta-miR-2285e	NM_006710	869	876	98	ENSG00000198612	COPS8
bta-miR-3-34194	NM_006734	78	85	98	ENSG00000010818	HIVEP2
bta-miR-14-10137	NM_006734	78	85	98	ENSG00000010818	HIVEP2
bta-miR-148a	NM_006743	100	107	96	ENSG00000102317	RBM3
bta-miR-14-10137	NM_006745	641	647	96	ENSG00000052802	MSMO1
bta-miR-3-34194	NM_006745	641	647	96	ENSG00000052802	MSMO1
bta-miR-2285e	NM_006745	572	579	99	ENSG00000052802	MSMO1
bta-miR-2285c	NM_006745	572	579	99	ENSG00000052802	MSMO1
bta-miR-186	NM_006751	883	890	98	ENSG00000138434	SSFA2
bta-miR-141	NM_006759	112	119	96	ENSG00000169764	UGP2
bta-miR-200a	NM_006759	112	119	96	ENSG00000169764	UGP2
bta-miR-148a	NM_006775	239	246	96	ENSG00000112531	QKI
bta-miR-148a	NM_006788	1261	1268	95	ENSG00000017797	RALBP1
bta-miR-186	NM_006805	1559	1566	98	ENSG00000177733	HNRNPA0
bta-miR-14-10137	NM_006809	794	801	96	ENSG00000025772	TOMM34
bta-miR-3-34194	NM_006809	794	801	96	ENSG00000025772	TOMM34
bta-miR-13-7336	NM_006811	121	128	97	ENSG00000132824	SERINC3
bta-miR-12-6501	NM_006811	121	128	97	ENSG00000132824	SERINC3
bta-miR-141	NM_006821	96	103	99	ENSG00000119673	ACOT2
bta-miR-200a	NM_006821	96	103	99	ENSG00000119673	ACOT2
bta-miR-186	NM_006824	96	102	96	ENSG00000117395	EBNA1BP2
bta-miR-186	NM_006837	142	149	99	ENSG00000121022	COPS5
bta-miR-141	NM_006875	101	108	96	ENSG00000102096	PIM2
bta-miR-200a	NM_006875	101	108	96	ENSG00000102096	PIM2
bta-miR-186	NM_006893	109	116	99	ENSG00000143486	EIF2D
bta-miR-200a	NM_006896	1155	1161	95	ENSG00000122592	HOXA7
bta-miR-148a	NM_006939	303	310	97	ENSG00000100485	SOS2
bta-miR-141	NM_006954	481	488	96	ENSG00000189180	ZNF33A
bta-miR-200a	NM_006954	481	488	96	ENSG00000189180	ZNF33A
bta-miR-200a	NM_006955	576	583	95	ENSG00000196693	ZNF33B
bta-miR-141	NM_006974	481	488	96	ENSG00000189180	ZNF33A
bta-miR-200a	NM_006974	481	488	96	ENSG00000189180	ZNF33A
bta-miR-14-10137	NM_006981	2722	2729	96	ENSG00000119508	NR4A3
bta-miR-3-34194	NM_006981	2722	2729	96	ENSG00000119508	NR4A3
bta-miR-148a	NM_006988	39	46	96	ENSG00000154734	ADAMTS1
bta-miR-186	NM_006999	1928	1934	96	ENSG00000112941	PAPD7
bta-miR-186	NM_007010	998	1005	99	ENSG00000278053	DDX52
bta-miR-186	NM_007010	998	1005	99	ENSG00000277594	DDX52
bta-miR-3-34194	NM_007026	274	280	95	ENSG00000275932	DUSP14
bta-miR-3-34194	NM_007026	274	280	95	ENSG00000276023	DUSP14
bta-miR-14-10137	NM_007026	274	280	95	ENSG00000275932	DUSP14
bta-miR-14-10137	NM_007026	274	280	95	ENSG00000276023	DUSP14
bta-miR-14-10137	NM_007035	810	816	97	ENSG00000139330	KERA
bta-miR-3-34194	NM_007035	810	816	97	ENSG00000139330	KERA
bta-miR-3-34194	NM_007036	1395	1402	99	ENSG00000164283	ESM1
bta-miR-14-10137	NM_007036	1395	1402	99	ENSG00000164283	ESM1
bta-miR-12-6501	NM_007039	1797	1804	98	ENSG00000070778	PTPN21
bta-miR-13-7336	NM_007039	1797	1804	98	ENSG00000070778	PTPN21
bta-miR-200a	NM_007043	121	128	99	ENSG00000111615	KRR1
bta-miR-141	NM_007043	121	128	99	ENSG00000111615	KRR1
bta-miR-13-7336	NM_007064	1500	1507	99	ENSG00000160145	KALRN
bta-miR-12-6501	NM_007064	1500	1507	99	ENSG00000160145	KALRN
bta-miR-186	NM_007080	159	165	96	ENSG00000164167	LSM6
bta-miR-14-10137	NM_007080	46	52	97	ENSG00000164167	LSM6
bta-miR-3-34194	NM_007080	46	52	97	ENSG00000164167	LSM6
bta-miR-3-34194	NM_007107	2422	2428	96	ENSG00000114850	SSR3
bta-miR-14-10137	NM_007107	2422	2428	96	ENSG00000114850	SSR3
bta-miR-186	NM_007114	69	75	97	ENSG00000144747	TMF1
bta-miR-186	NM_007114	197	204	99	ENSG00000144747	TMF1
bta-miR-186	NM_007114	124	130	98	ENSG00000144747	TMF1
bta-miR-141	NM_007173	167	174	95	ENSG00000150687	PRSS23
bta-miR-200a	NM_007173	167	174	95	ENSG00000150687	PRSS23
bta-miR-148a	NM_007187	321	328	95	ENSG00000120688	WBP4
bta-miR-2285c	NM_007191	246	253	98	ENSG00000156076	WIF1
bta-miR-2285e	NM_007191	246	253	98	ENSG00000156076	WIF1
bta-miR-186	NM_007231	447	454	95	ENSG00000268104	SLC6A14
bta-miR-14-10137	NM_007241	105	111	96	ENSG00000159210	SNF8
bta-miR-3-34194	NM_007241	105	111	96	ENSG00000159210	SNF8
bta-miR-141	NM_007249	79	86	95	ENSG00000118922	KLF12
bta-miR-200a	NM_007249	79	86	95	ENSG00000118922	KLF12
bta-miR-186	NM_007257	1920	1926	95	ENSG00000240694	PNMA2
bta-miR-2285e	NM_007286	1805	1812	96	ENSG00000171992	SYNPO
bta-miR-2285c	NM_007286	1805	1812	96	ENSG00000171992	SYNPO
bta-miR-13-7336	NM_007308	1619	1626	97	ENSG00000145335	SNCA
bta-miR-12-6501	NM_007308	1619	1626	97	ENSG00000145335	SNCA
bta-miR-200a	NM_007314	7395	7402	98	ENSG00000143322	ABL2
bta-miR-141	NM_007314	7395	7402	98	ENSG00000143322	ABL2
bta-miR-141	NM_007332	893	900	96	ENSG00000104321	TRPA1
bta-miR-200a	NM_007332	893	900	96	ENSG00000104321	TRPA1
bta-miR-186	NM_007333	18	24	99	ENSG00000205810	KLRC3
bta-miR-148a	NM_007342	260	267	98	ENSG00000136243	NUPL2
bta-miR-148a	NM_007347	2718	2725	95	ENSG00000081014	AP4E1
bta-miR-186	NM_007348	332	338	95	ENSG00000118217	ATF6
bta-miR-186	NM_007351	1127	1134	99	ENSG00000138722	MMRN1
bta-miR-2285e	NM_007353	2220	2227	98	ENSG00000146535	GNA12
bta-miR-2285c	NM_007353	2220	2227	98	ENSG00000146535	GNA12
bta-miR-141	NM_007371	120	127	97	ENSG00000169925	BRD3
bta-miR-200a	NM_007371	120	127	97	ENSG00000169925	BRD3
bta-miR-13-7336	NM_012089	227	233	96	ENSG00000135776	ABCB10
bta-miR-12-6501	NM_012089	227	233	95	ENSG00000135776	ABCB10
bta-miR-2285e	NM_012089	226	232	96	ENSG00000135776	ABCB10
bta-miR-2285c	NM_012089	226	232	96	ENSG00000135776	ABCB10
bta-miR-200a	NM_012090	1299	1305	95	ENSG00000127603	MACF1
bta-miR-141	NM_012090	1299	1305	95	ENSG00000127603	MACF1
bta-miR-148a	NM_012137	2839	2846	97	ENSG00000153904	DDAH1
bta-miR-200a	NM_012152	86	93	97	ENSG00000171517	LPAR3
bta-miR-141	NM_012152	86	93	96	ENSG00000171517	LPAR3
bta-miR-12-6501	NM_012153	3746	3752	96	ENSG00000135373	EHF
bta-miR-13-7336	NM_012153	3746	3752	96	ENSG00000135373	EHF
bta-miR-148a	NM_012155	282	289	98	ENSG00000125746	EML2
bta-miR-200a	NM_012157	313	320	95	ENSG00000153558	FBXL2
bta-miR-141	NM_012184	554	561	99	ENSG00000184492	FOXD4L1
bta-miR-200a	NM_012184	554	561	99	ENSG00000184492	FOXD4L1
bta-miR-12-6501	NM_012192	1325	1332	99	ENSG00000132286	TIMM10B
bta-miR-13-7336	NM_012192	1325	1332	98	ENSG00000132286	TIMM10B
bta-miR-13-7336	NM_012201	3587	3593	95	ENSG00000090863	GLG1
bta-miR-186	NM_012253	99	105	95	ENSG00000007350	TKTL1
bta-miR-186	NM_012287	4313	4319	96	ENSG00000114331	ACAP2
bta-miR-186	NM_012302	1049	1055	97	ENSG00000117114	ADGRL2
bta-miR-148a	NM_012321	343	350	97	ENSG00000130520	LSM4
bta-miR-148a	NM_012329	95	102	96	ENSG00000108960	MMD
bta-miR-13-7336	NM_012345	1692	1699	98	ENSG00000083635	NUFIP1
bta-miR-12-6501	NM_012345	1692	1699	97	ENSG00000083635	NUFIP1
bta-miR-13-7336	NM_012383	303	309	95	ENSG00000134996	OSTF1
bta-miR-12-6501	NM_012383	303	309	95	ENSG00000134996	OSTF1
bta-miR-12-6501	NM_012397	55	62	97	ENSG00000197641	SERPINB13
bta-miR-13-7336	NM_012397	55	62	97	ENSG00000197641	SERPINB13
bta-miR-200a	NM_012416	144	151	96	ENSG00000137040	RANBP6
bta-miR-141	NM_012416	144	151	96	ENSG00000137040	RANBP6
bta-miR-148a	NM_012428	732	739	97	ENSG00000156642	NPTN
bta-miR-186	NM_012429	2871	2878	96	ENSG00000100003	SEC14L2
bta-miR-200a	NM_012437	470	477	97	ENSG00000143553	SNAPIN
bta-miR-141	NM_012437	470	477	97	ENSG00000143553	SNAPIN
bta-miR-186	NM_013250	117	124	98	ENSG00000149054	ZNF215
bta-miR-3-34194	NM_013277	111	118	99	ENSG00000161800	RACGAP1
bta-miR-14-10137	NM_013277	111	118	99	ENSG00000161800	RACGAP1
bta-miR-2285c	NM_013281	173	180	99	ENSG00000125848	FLRT3
bta-miR-2285e	NM_013281	173	180	99	ENSG00000125848	FLRT3
bta-miR-200a	NM_013332	87	94	96	ENSG00000135245	HILPDA
bta-miR-141	NM_013332	87	94	96	ENSG00000135245	HILPDA
bta-miR-14-10137	NM_013374	2860	2867	99	ENSG00000170248	PDCD6IP
bta-miR-3-34194	NM_013374	2860	2867	99	ENSG00000170248	PDCD6IP
bta-miR-141	NM_013381	79	86	98	ENSG00000072657	TRHDE
bta-miR-200a	NM_013381	79	86	98	ENSG00000072657	TRHDE
bta-miR-3-34194	NM_013386	373	380	95	ENSG00000085491	SLC25A24
bta-miR-14-10137	NM_013386	373	380	95	ENSG00000085491	SLC25A24
bta-miR-186	NM_013445	120	126	96	ENSG00000128683	GAD1
bta-miR-186	NM_013450	1240	1246	95	ENSG00000123636	BAZ2B
bta-miR-186	NM_013995	1851	1857	96	ENSG00000005893	LAMP2
bta-miR-141	NM_014011	79	86	97	ENSG00000171150	SOCS5
bta-miR-186	NM_014011	2645	2652	99	ENSG00000171150	SOCS5
bta-miR-200a	NM_014011	79	86	97	ENSG00000171150	SOCS5
bta-miR-186	NM_014016	1695	1701	97	ENSG00000211456	SACM1L
bta-miR-186	NM_014031	57	64	96	ENSG00000113396	SLC27A6
bta-miR-13-7336	NM_014035	1293	1300	98	ENSG00000064652	SNX24
bta-miR-12-6501	NM_014035	1293	1300	98	ENSG00000064652	SNX24
bta-miR-14-10137	NM_014041	292	298	96	ENSG00000114902	SPCS1
[truncated: 1,376 more rows]

## Sheet: TS1b.BLUE MODULE
Table S1b. Predicted Target genes for miRNA members of the BLUE module
miRNAs	TRANSCRIPT ID	UTR.start	UTR.end	context.score.percentile	ensembl_gene_id	hgnc_symbol
bta-miR-5-37255	NM_000020	2001	2008	98	ENSG00000139567	ACVRL1
bta-miR-5-37255	NM_000028	2084	2091	97	ENSG00000162688	AGL
bta-miR-24-3p	NM_000031	540	547	95	ENSG00000148218	ALAD
bta-miR-19-17220	NM_000031	159	166	96	ENSG00000148218	ALAD
bta-miR-1249	NM_000031	1261	1268	97	ENSG00000148218	ALAD
bta-miR-5-37255	NM_000035	374	381	95	ENSG00000136872	ALDOB
bta-miR-2387	NM_000040	152	159	98	ENSG00000110245	APOC3
bta-miR-27a-3p	NM_000043	1157	1164	99	ENSG00000026103	FAS
bta-miR-6123	NM_000043	76	82	95	ENSG00000026103	FAS
bta-miR-5-37255	NM_000045	337	344	96	ENSG00000118520	ARG1
bta-miR-330	NM_000063	104	111	95	ENSG00000231543	C2
bta-miR-330	NM_000063	104	111	95	ENSG00000204364	C2
bta-miR-330	NM_000063	104	111	95	ENSG00000226560	C2
bta-miR-330	NM_000063	104	111	95	ENSG00000235696	C2
bta-miR-330	NM_000063	104	111	95	ENSG00000166278	C2
bta-miR-330	NM_000063	104	111	95	ENSG00000235017	C2
bta-miR-330	NM_000063	104	111	95	ENSG00000206372	C2
bta-miR-2346	NM_000065	77	84	97	ENSG00000039537	C6
bta-miR-27a-3p	NM_000068	1448	1455	96	ENSG00000141837	CACNA1A
bta-miR-4-36127	NM_000073	256	262	96	ENSG00000160654	CD3G
bta-miR-1-612	NM_000073	256	262	96	ENSG00000160654	CD3G
bta-miR-1-1319	NM_000073	256	262	96	ENSG00000160654	CD3G
bta-miR-6529a	NM_000074	806	812	97	ENSG00000102245	CD40LG
bta-miR-2346	NM_000077	35	42	98	ENSG00000147889	CDKN2A
bta-miR-2387	NM_000082	540	547	99	ENSG00000049167	ERCC8
bta-miR-760-3p	NM_000085	21	28	97	ENSG00000184908	CLCNKB
bta-miR-874	NM_000087	131	138	99	ENSG00000198515	CNGA1
bta-miR-25-27602	NM_000090	757	764	98	ENSG00000168542	COL3A1
bta-miR-25-27602	NM_000103	146	153	95	ENSG00000137869	CYP19A1
bta-miR-330	NM_000111	310	317	99	ENSG00000091138	SLC26A3
bta-miR-27a-3p	NM_000113	619	626	95	ENSG00000136827	TOR1A
bta-miR-27a-3p	NM_000113	640	647	96	ENSG00000136827	TOR1A
bta-miR-1249	NM_000113	527	534	95	ENSG00000136827	TOR1A
bta-miR-221	NM_000122	63	70	99	ENSG00000163161	ERCC3
bta-miR-222	NM_000122	63	70	99	ENSG00000163161	ERCC3
bta-miR-18a	NM_000125	4180	4187	99	ENSG00000091831	ESR1
bta-miR-18a	NM_000125	4217	4224	99	ENSG00000091831	ESR1
bta-miR-149-5p	NM_000127	91	98	95	ENSG00000182197	EXT1
bta-miR-2448-3p	NM_000134	982	989	98	ENSG00000145384	FABP2
bta-miR-2387	NM_000136	989	996	97	ENSG00000158169	FANCC
bta-miR-760-3p	NM_000138	2159	2166	96	ENSG00000166147	FBN1
bta-miR-2448-3p	NM_000138	520	527	95	ENSG00000166147	FBN1
bta-miR-25-27602	NM_000142	1063	1070	97	ENSG00000068078	FGFR3
bta-miR-2387	NM_000144	142	149	96	ENSG00000165060	FXN
bta-miR-326	NM_000145	417	424	99	ENSG00000170820	FSHR
bta-miR-760-3p	NM_000153	53	60	99	ENSG00000054983	GALC
bta-miR-2448-3p	NM_000158	678	685	99	ENSG00000114480	GBE1
bta-miR-25-27602	NM_000162	616	623	96	ENSG00000106633	GCK
bta-miR-5-37255	NM_000164	296	303	95	ENSG00000010310	GIPR
bta-miR-18a	NM_000165	54	61	98	ENSG00000152661	GJA1
bta-miR-2323	NM_000167	2609	2616	99	ENSG00000198814	GK
bta-miR-874	NM_000170	377	384	96	ENSG00000178445	GLDC
bta-miR-18a	NM_000182	485	492	95	ENSG00000084754	HADHA
bta-miR-19-17220	NM_000191	485	492	97	ENSG00000117305	HMGCL
bta-miR-2403	NM_000194	164	171	95	ENSG00000165704	HPRT1
bta-miR-5-37953	NM_000198	297	303	96	ENSG00000203859	HSD3B2
bta-miR-2331-3p	NM_000199	134	141	97	ENSG00000181523	SGSH
bta-miR-2331-3p	NM_000201	946	953	95	ENSG00000090339	ICAM1
bta-miR-326	NM_000201	761	768	95	ENSG00000090339	ICAM1
bta-miR-2448-3p	NM_000201	57	64	95	ENSG00000090339	ICAM1
bta-miR-27a-3p	NM_000208	193	200	95	ENSG00000171105	INSR
bta-miR-760-3p	NM_000209	327	334	96	ENSG00000139515	PDX1
bta-miR-326	NM_000214	1605	1612	96	ENSG00000101384	JAG1
bta-miR-874	NM_000215	147	154	97	ENSG00000105639	JAK3
bta-miR-27a-3p	NM_000220	975	982	97	ENSG00000151704	KCNJ1
bta-miR-25-27602	NM_000221	883	890	98	ENSG00000138030	KHK
bta-miR-222	NM_000222	1899	1906	99	ENSG00000157404	KIT
bta-miR-221	NM_000222	1899	1906	98	ENSG00000157404	KIT
bta-miR-25-27602	NM_000224	28	35	99	ENSG00000111057	KRT18
bta-miR-5-37255	NM_000237	146	153	99	ENSG00000175445	LPL
bta-miR-330	NM_000237	1694	1701	97	ENSG00000175445	LPL
bta-miR-24-3p	NM_000237	1844	1851	99	ENSG00000175445	LPL
bta-miR-1-1319	NM_000240	136	143	99	ENSG00000189221	MAOA
bta-miR-4-36127	NM_000240	136	143	99	ENSG00000189221	MAOA
bta-miR-1-612	NM_000240	136	143	99	ENSG00000189221	MAOA
bta-miR-19-17220	NM_000252	422	429	99	ENSG00000171100	MTM1
bta-miR-27a-3p	NM_000253	259	266	96	ENSG00000138823	MTTP
bta-miR-24-3p	NM_000253	191	198	97	ENSG00000138823	MTTP
bta-miR-6123	NM_000254	4313	4320	97	ENSG00000116984	MTR
bta-miR-27a-3p	NM_000259	5452	5459	96	ENSG00000197535	MYO5A
bta-miR-2323	NM_000264	2819	2826	98	ENSG00000185920	PTCH1
bta-miR-221	NM_000266	106	113	98	ENSG00000124479	NDP
bta-miR-222	NM_000266	106	113	97	ENSG00000124479	NDP
bta-miR-25-27602	NM_000267	3345	3352	99	ENSG00000196712	NF1
bta-miR-330	NM_000269	221	227	95	ENSG00000239672	NME1
bta-miR-361	NM_000272	97	104	98	ENSG00000144061	NPHP1
bta-miR-361	NM_000272	312	319	98	ENSG00000144061	NPHP1
bta-miR-27a-3p	NM_000286	109	116	99	ENSG00000108733	PEX12
bta-miR-25-27602	NM_000294	3090	3097	98	ENSG00000156873	PHKG2
bta-miR-2346	NM_000295	1628	1635	95	ENSG00000197249	SERPINA1
bta-miR-2346	NM_000295	1628	1635	95	ENSG00000277377	SERPINA1
bta-miR-378	NM_000295	1537	1544	97	ENSG00000197249	SERPINA1
bta-miR-378	NM_000295	1537	1544	97	ENSG00000277377	SERPINA1
bta-miR-19-17220	NM_000300	21	28	96	ENSG00000188257	PLA2G2A
bta-miR-378	NM_000303	244	251	95	ENSG00000140650	PMM2
bta-miR-2346	NM_000304	1142	1149	99	ENSG00000109099	PMP22
bta-miR-6123	NM_000309	38	44	96	ENSG00000143224	PPOX
bta-miR-2350	NM_000311	1349	1356	99	ENSG00000171867	PRNP
bta-miR-2350	NM_000313	921	928	99	ENSG00000184500	PROS1
bta-miR-4-36127	NM_000326	371	378	99	ENSG00000140522	RLBP1
bta-miR-1-1319	NM_000326	371	378	99	ENSG00000140522	RLBP1
bta-miR-1-612	NM_000326	371	378	99	ENSG00000140522	RLBP1
bta-miR-361	NM_000328	78	85	98	ENSG00000156313	RPGR
bta-miR-18a	NM_000332	6760	6767	97	ENSG00000124788	ATXN1
bta-miR-330	NM_000339	823	830	97	ENSG00000070915	SLC12A3
bta-miR-5-37255	NM_000342	1412	1419	99	ENSG00000004939	SLC4A1
bta-miR-760-3p	NM_000358	555	562	97	ENSG00000120708	TGFBI
bta-miR-18a	NM_000361	52	59	95	ENSG00000178726	THBD
bta-miR-149-5p	NM_000362	3433	3440	96	ENSG00000100234	TIMP3
bta-miR-24-3p	NM_000365	29	36	96	ENSG00000111669	TPI1
bta-miR-27a-3p	NM_000368	4740	4747	99	ENSG00000165699	TSC1
bta-miR-24-3p	NM_000369	255	262	98	ENSG00000165409	TSHR
bta-miR-361	NM_000369	1732	1739	96	ENSG00000165409	TSHR
bta-miR-361	NM_000378	1114	1121	98	ENSG00000184937	WT1
bta-miR-2323	NM_000386	202	209	96	ENSG00000108578	BLMH
bta-miR-378	NM_000388	314	321	95	ENSG00000283187	CASR
bta-miR-149-5p	NM_000391	241	248	97	ENSG00000166340	TPP1
bta-miR-24-3p	NM_000391	239	246	97	ENSG00000166340	TPP1
bta-miR-2346	NM_000392	161	168	98	ENSG00000023839	ABCC2
bta-miR-4-36127	NM_000393	147	154	98	ENSG00000204262	COL5A2
bta-miR-1-612	NM_000393	147	154	98	ENSG00000204262	COL5A2
bta-miR-1-1319	NM_000393	147	154	98	ENSG00000204262	COL5A2
bta-miR-361	NM_000410	840	847	95	ENSG00000010704	HFE
bta-miR-2346	NM_000411	2969	2976	99	ENSG00000159267	HLCS
bta-miR-326	NM_000418	673	680	95	ENSG00000077238	IL4R
bta-miR-874	NM_000420	67	74	99	ENSG00000197993	KEL
bta-miR-874	NM_000420	67	74	99	ENSG00000276615	KEL
bta-miR-760-3p	NM_000429	51	58	96	ENSG00000151224	MAT1A
bta-miR-5-37953	NM_000430	3554	3561	98	ENSG00000007168	PAFAH1B1
bta-miR-2387	NM_000431	440	447	96	ENSG00000110921	MVK
bta-miR-1-612	NM_000434	645	651	96	ENSG00000234343	NEU1
bta-miR-1-612	NM_000434	645	651	96	ENSG00000227129	NEU1
bta-miR-1-612	NM_000434	645	651	96	ENSG00000223957	NEU1
bta-miR-1-612	NM_000434	645	651	96	ENSG00000234846	NEU1
bta-miR-1-612	NM_000434	645	651	96	ENSG00000184494	NEU1
bta-miR-1-612	NM_000434	645	651	96	ENSG00000227315	NEU1
bta-miR-1-612	NM_000434	645	651	96	ENSG00000204386	NEU1
bta-miR-1-612	NM_000434	645	651	96	ENSG00000228691	NEU1
bta-miR-1-1319	NM_000434	645	651	96	ENSG00000234343	NEU1
bta-miR-1-1319	NM_000434	645	651	96	ENSG00000227129	NEU1
bta-miR-1-1319	NM_000434	645	651	96	ENSG00000223957	NEU1
bta-miR-1-1319	NM_000434	645	651	96	ENSG00000234846	NEU1
bta-miR-1-1319	NM_000434	645	651	96	ENSG00000184494	NEU1
bta-miR-1-1319	NM_000434	645	651	96	ENSG00000227315	NEU1
bta-miR-1-1319	NM_000434	645	651	96	ENSG00000204386	NEU1
bta-miR-1-1319	NM_000434	645	651	96	ENSG00000228691	NEU1
bta-miR-4-36127	NM_000434	645	651	96	ENSG00000234343	NEU1
bta-miR-4-36127	NM_000434	645	651	96	ENSG00000227129	NEU1
bta-miR-4-36127	NM_000434	645	651	96	ENSG00000223957	NEU1
bta-miR-4-36127	NM_000434	645	651	96	ENSG00000234846	NEU1
bta-miR-4-36127	NM_000434	645	651	96	ENSG00000184494	NEU1
bta-miR-4-36127	NM_000434	645	651	96	ENSG00000227315	NEU1
bta-miR-4-36127	NM_000434	645	651	96	ENSG00000204386	NEU1
bta-miR-4-36127	NM_000434	645	651	96	ENSG00000228691	NEU1
bta-miR-27a-3p	NM_000434	612	619	98	ENSG00000234343	NEU1
bta-miR-27a-3p	NM_000434	612	619	98	ENSG00000227129	NEU1
bta-miR-27a-3p	NM_000434	612	619	98	ENSG00000223957	NEU1
bta-miR-27a-3p	NM_000434	612	619	98	ENSG00000234846	NEU1
bta-miR-27a-3p	NM_000434	612	619	98	ENSG00000184494	NEU1
bta-miR-27a-3p	NM_000434	612	619	98	ENSG00000227315	NEU1
bta-miR-27a-3p	NM_000434	612	619	98	ENSG00000204386	NEU1
bta-miR-27a-3p	NM_000434	612	619	98	ENSG00000228691	NEU1
bta-miR-874	NM_000435	925	932	98	ENSG00000074181	NOTCH3
bta-miR-874	NM_000439	332	339	97	ENSG00000175426	PCSK1
bta-miR-378	NM_000449	353	360	95	ENSG00000143390	RFX5
bta-miR-2346	NM_000452	262	269	95	ENSG00000125255	SLC10A2
bta-miR-1249	NM_000457	120	127	96	ENSG00000101076	HNF4A
bta-miR-24-3p	NM_000458	367	374	98	ENSG00000275410	HNF1B
bta-miR-24-3p	NM_000458	367	374	98	ENSG00000276194	HNF1B
bta-miR-760-3p	NM_000459	582	589	96	ENSG00000120156	TEK
bta-miR-149-5p	NM_000461	5547	5554	99	ENSG00000151090	THRB
bta-miR-2350	NM_000480	439	446	96	ENSG00000133805	AMPD3
bta-miR-19-17220	NM_000483	207	214	98	ENSG00000224916	APOC4-APOC2
bta-miR-11-5700	NM_000489	3365	3371	96	ENSG00000085224	ATRX
bta-miR-11-5700	NM_000495	215	222	99	ENSG00000188153	COL4A5
bta-miR-874	NM_000501	158	165	95	ENSG00000049540	ELN
bta-miR-2323	NM_000502	198	205	95	ENSG00000121053	EPX
bta-miR-27a-3p	NM_000503	200	207	96	ENSG00000104313	EYA1
bta-miR-2387	NM_000503	1569	1576	97	ENSG00000104313	EYA1
bta-miR-27a-3p	NM_000522	1205	1212	96	ENSG00000106031	HOXA13
bta-miR-1-1319	NM_000530	260	267	97	ENSG00000158887	MPZ
bta-miR-1-612	NM_000530	260	267	97	ENSG00000158887	MPZ
bta-miR-4-36127	NM_000530	260	267	97	ENSG00000158887	MPZ
bta-miR-2350	NM_000532	23	30	98	ENSG00000114054	PCCB
bta-miR-326	NM_000544	358	365	98	ENSG00000225967	TAP2
bta-miR-326	NM_000544	358	365	98	ENSG00000204267	TAP2
bta-miR-326	NM_000544	358	365	98	ENSG00000228582	TAP2
bta-miR-326	NM_000544	358	365	98	ENSG00000206299	TAP2
bta-miR-326	NM_000544	358	365	98	ENSG00000206235	TAP2
bta-miR-326	NM_000544	358	365	98	ENSG00000237599	TAP2
bta-miR-326	NM_000544	358	365	98	ENSG00000223481	TAP2
bta-miR-326	NM_000544	358	365	98	ENSG00000232326	TAP2
bta-miR-25-27602	NM_000544	2454	2461	96	ENSG00000225967	TAP2
bta-miR-25-27602	NM_000544	2454	2461	96	ENSG00000204267	TAP2
bta-miR-25-27602	NM_000544	2454	2461	96	ENSG00000228582	TAP2
bta-miR-25-27602	NM_000544	2454	2461	96	ENSG00000206299	TAP2
bta-miR-25-27602	NM_000544	2454	2461	96	ENSG00000206235	TAP2
bta-miR-25-27602	NM_000544	2454	2461	96	ENSG00000237599	TAP2
bta-miR-25-27602	NM_000544	2454	2461	96	ENSG00000223481	TAP2
bta-miR-25-27602	NM_000544	2454	2461	96	ENSG00000232326	TAP2
bta-miR-874	NM_000545	1045	1052	96	ENSG00000135100	HNF1A
bta-miR-2387	NM_000551	483	490	95	ENSG00000134086	VHL
bta-miR-6529a	NM_000560	705	711	96	ENSG00000143119	CD53
bta-miR-505	NM_000566	80	87	95	ENSG00000150337	FCGR1A
bta-miR-149-5p	NM_000587	333	340	98	ENSG00000112936	C7
bta-miR-19-17220	NM_000594	372	379	95	ENSG00000230108	TNF
bta-miR-19-17220	NM_000594	372	379	95	ENSG00000223952	TNF
bta-miR-19-17220	NM_000594	372	379	95	ENSG00000232810	TNF
bta-miR-19-17220	NM_000594	372	379	95	ENSG00000228849	TNF
bta-miR-19-17220	NM_000594	372	379	95	ENSG00000228321	TNF
bta-miR-19-17220	NM_000594	372	379	95	ENSG00000228978	TNF
bta-miR-19-17220	NM_000594	372	379	95	ENSG00000206439	TNF
bta-miR-19-17220	NM_000594	372	379	95	ENSG00000204490	TNF
bta-miR-326	NM_000603	104	111	99	ENSG00000164867	NOS3
bta-miR-6529a	NM_000603	290	297	99	ENSG00000164867	NOS3
bta-miR-222	NM_000609	165	172	97	ENSG00000107562	CXCL12
bta-miR-222	NM_000609	3158	3165	98	ENSG00000107562	CXCL12
bta-miR-221	NM_000609	3158	3165	97	ENSG00000107562	CXCL12
bta-miR-221	NM_000609	165	172	97	ENSG00000107562	CXCL12
bta-miR-2331-3p	NM_000611	295	302	96	ENSG00000085063	CD59
bta-miR-11-5700	NM_000615	2952	2959	99	ENSG00000149294	NCAM1
bta-miR-760-3p	NM_000617	22	29	99	ENSG00000110911	SLC11A2
bta-miR-24-3p	NM_000619	384	391	99	ENSG00000111537	IFNG
bta-miR-378	NM_000629	256	263	97	ENSG00000142166	IFNAR1
bta-miR-2448-3p	NM_000633	4791	4798	95	ENSG00000171791	BCL2
bta-miR-24-3p	NM_000639	514	521	96	ENSG00000117560	FASLG
bta-miR-874	NM_000641	651	658	98	ENSG00000095752	IL11
bta-miR-5-37255	NM_000642	2084	2091	97	ENSG00000162688	AGL
bta-miR-5-37255	NM_000643	2084	2091	97	ENSG00000162688	AGL
bta-miR-5-37255	NM_000644	2084	2091	97	ENSG00000162688	AGL
bta-miR-5-37255	NM_000645	2084	2091	97	ENSG00000283495
bta-miR-5-37255	NM_000646	2084	2091	97	ENSG00000162688	AGL
bta-miR-27a-3p	NM_000676	316	323	98	ENSG00000170425	ADORA2B
bta-miR-760-3p	NM_000681	221	228	95	ENSG00000150594	ADRA2A
bta-miR-19-17220	NM_000681	62	69	96	ENSG00000150594	ADRA2A
bta-miR-2387	NM_000682	487	494	95	ENSG00000274286	ADRA2B
bta-miR-874	NM_000686	1026	1033	96	ENSG00000180772	AGTR2
bta-miR-2387	NM_000687	19	26	97	ENSG00000101444	AHCY
bta-miR-378	NM_000688	115	122	99	ENSG00000023330	ALAS1
bta-miR-11-5700	NM_000692	975	981	96	ENSG00000137124	ALDH1B1
bta-miR-19-17220	NM_000694	96	103	95	ENSG00000006534	ALDH3B1
bta-miR-3432a	NM_000696	404	411	95	ENSG00000143149	ALDH9A1
bta-miR-326	NM_000699	27	34	99	ENSG00000243480	AMY2A
bta-miR-760-3p	NM_000720	866	873	99	ENSG00000157388	CACNA1D
bta-miR-326	NM_000723	284	291	95	ENSG00000067191	CACNB1
bta-miR-760-3p	NM_000723	1725	1732	96	ENSG00000067191	CACNB1
bta-miR-874	NM_000724	1514	1521	98	ENSG00000165995	CACNB2
bta-miR-326	NM_000734	383	390	96	ENSG00000198821	CD247
bta-miR-19-17220	NM_000738	939	946	98	ENSG00000168539	CHRM1
bta-miR-5-37255	NM_000739	213	220	99	ENSG00000181072	CHRM2
bta-miR-2323	NM_000745	567	574	96	ENSG00000169684	CHRNA5
bta-miR-25-27602	NM_000746	1079	1086	96	ENSG00000282088
bta-miR-25-27602	NM_000746	1079	1086	96	ENSG00000274542
bta-miR-25-27602	NM_000746	1079	1086	96	ENSG00000175344	CHRNA7
bta-miR-24-3p	NM_000767	559	566	98	ENSG00000197408	CYP2B6
bta-miR-27a-3p	NM_000772	644	651	97	ENSG00000108242	CYP2C18
bta-miR-2331-3p	NM_000772	566	573	96	ENSG00000108242	CYP2C18
bta-miR-11-5700	NM_000781	226	233	99	ENSG00000140459	CYP11A1
bta-miR-19-17220	NM_000789	270	277	96	ENSG00000159640	ACE
bta-miR-2387	NM_000799	60	67	95	ENSG00000130427	EPO
bta-miR-18a	NM_000800	3023	3030	99	ENSG00000113578	FGF1
bta-miR-2387	NM_000800	2523	2530	98	ENSG00000113578	FGF1
bta-miR-18a	NM_000806	2393	2400	96	ENSG00000022355	GABRA1
bta-miR-149-5p	NM_000806	211	218	95	ENSG00000022355	GABRA1
bta-miR-2346	NM_000807	659	666	98	ENSG00000151834	GABRA2
bta-miR-2448-3p	NM_000809	363	370	95	ENSG00000109158	GABRA4
bta-miR-18a	NM_000810	253	260	96	ENSG00000186297	GABRA5
bta-miR-505	NM_000811	341	348	95	ENSG00000145863	GABRA6
bta-miR-2323	NM_000816	1751	1758	97	ENSG00000113327	GABRG2
bta-miR-2323	NM_000816	2165	2172	99	ENSG00000113327	GABRG2
bta-miR-760-3p	NM_000824	1196	1203	99	ENSG00000109738	GLRB
bta-miR-361	NM_000824	316	323	97	ENSG00000109738	GLRB
bta-miR-330	NM_000824	1126	1133	96	ENSG00000109738	GLRB
bta-miR-221	NM_000824	371	378	95	ENSG00000109738	GLRB
bta-miR-5-37255	NM_000826	2412	2419	98	ENSG00000120251	GRIA2
bta-miR-24-3p	NM_000828	66	73	96	ENSG00000125675	GRIA3
bta-miR-149-5p	NM_000828	68	75	98	ENSG00000125675	GRIA3
bta-miR-2350	NM_000834	1233	1240	96	ENSG00000273079	GRIN2B
bta-miR-330	NM_000834	1309	1316	97	ENSG00000273079	GRIN2B
bta-miR-27a-3p	NM_000842	3352	3359	96	ENSG00000168959	GRM5
bta-miR-361	NM_000846	337	344	97	ENSG00000244067	GSTA2
bta-miR-361	NM_000857	988	995	96	ENSG00000061918	GUCY1B3
bta-miR-2350	NM_000859	486	493	99	ENSG00000113161	HMGCR
bta-miR-330	NM_000860	1533	1540	96	ENSG00000164120	HPGD
bta-miR-5-37953	NM_000862	297	303	96	ENSG00000203857	HSD3B1
bta-miR-24-3p	NM_000864	160	167	98	ENSG00000179546	HTR1D
bta-miR-25-27602	NM_000868	337	344	98	ENSG00000147246	HTR2C
bta-miR-874	NM_000868	2081	2088	96	ENSG00000147246	HTR2C
bta-miR-760-3p	NM_000869	135	142	95	ENSG00000166736	HTR3A
bta-miR-6123	NM_000875	6244	6251	96	ENSG00000140443	IGF1R
bta-miR-874	NM_000877	167	174	95	ENSG00000115594	IL1R1
bta-miR-11-5700	NM_000878	1991	1997	95	ENSG00000100385	IL2RB
bta-miR-2346	NM_000885	2179	2186	97	ENSG00000115232	ITGA4
bta-miR-326	NM_000887	687	694	99	ENSG00000140678	ITGAX
bta-miR-378	NM_000887	537	544	98	ENSG00000140678	ITGAX
bta-miR-27a-3p	NM_000899	182	189	98	ENSG00000049130	KITLG
bta-miR-378	NM_000901	2392	2399	95	ENSG00000151623	NR3C2
bta-miR-2387	NM_000903	666	673	97	ENSG00000181019	NQO1
bta-miR-19-17220	NM_000903	973	980	97	ENSG00000181019	NQO1
bta-miR-18a	NM_000914	423	430	98	ENSG00000112038	OPRM1
bta-miR-149-5p	NM_000916	2211	2218	97	ENSG00000180914	OXTR
bta-miR-2331-3p	NM_000918	115	122	99	ENSG00000185624	P4HB
bta-miR-19-17220	NM_000920	216	223	99	ENSG00000173599	PC
bta-miR-19-17220	NM_000921	565	572	99	ENSG00000172572	PDE3A
bta-miR-2323	NM_000925	15	22	99	ENSG00000168291	PDHB
bta-miR-5-37953	NM_000926	76	82	97	ENSG00000082175	PGR
bta-miR-874	NM_000932	134	141	96	ENSG00000149782	PLCB3
bta-miR-19-17220	NM_000932	1274	1281	96	ENSG00000149782	PLCB3
bta-miR-11-5700	NM_000935	18	24	96	ENSG00000152952	PLOD2
bta-miR-2448-3p	NM_000946	44	51	98	ENSG00000198056	PRIM1
bta-miR-27a-3p	NM_000953	1472	1479	97	ENSG00000168229	PTGDR
bta-miR-874	NM_000955	49	56	96	ENSG00000160951	PTGER1
bta-miR-2331-3p	NM_000959	3969	3976	99	ENSG00000122420	PTGFR
bta-miR-874	NM_000961	240	247	98	ENSG00000124212	PTGIS
bta-miR-25-27602	NM_000965	307	314	97	ENSG00000077092	RARB
bta-miR-330	NM_001001419	4445	4452	95	ENSG00000113658	SMAD5
bta-miR-330	NM_001001420	4445	4452	95	ENSG00000113658	SMAD5
bta-miR-330	NM_001001481	194	201	97	ENSG00000104343	UBE2W
bta-miR-222	NM_001001484	2177	2184	97	ENSG00000165983	PTER
bta-miR-221	NM_001001484	2177	2184	97	ENSG00000165983	PTER
bta-miR-25-27602	NM_001001484	130	137	99	ENSG00000165983	PTER
bta-miR-6123	NM_001001548	454	461	99	ENSG00000135218	CD36
bta-miR-1-1319	NM_001001556	79	85	96	ENSG00000156958	GALK2
bta-miR-1-612	NM_001001556	79	85	96	ENSG00000156958	GALK2
bta-miR-4-36127	NM_001001556	79	85	96	ENSG00000156958	GALK2
bta-miR-2346	NM_001001662	134	141	99	ENSG00000196597	ZNF782
bta-miR-19-17220	NM_001001671	539	546	99	ENSG00000180815	MAP3K15
bta-miR-24-3p	NM_001001673	465	472	96	ENSG00000188655	RNASE9
bta-miR-378	NM_001001701	488	495	97	ENSG00000164096	C4orf3
bta-miR-6529a	NM_001001711	914	921	98	ENSG00000170967	DDI1
bta-miR-760-3p	NM_001001711	131	138	98	ENSG00000170967	DDI1
bta-miR-2323	NM_001001715	148	155	96	ENSG00000152767	FARP1
bta-miR-2350	NM_001001875	81	88	99	ENSG00000170777	TPD52L3
bta-miR-2350	NM_001001877	207	214	98	ENSG00000169953	HSFY2
bta-miR-19-17220	NM_001001890	116	123	95	ENSG00000159216	RUNX1
bta-miR-19-17220	NM_001001890	130	137	95	ENSG00000159216	RUNX1
bta-miR-18a	NM_001001890	487	494	96	ENSG00000159216	RUNX1
bta-miR-2387	NM_001001894	1322	1329	98	ENSG00000182670	TTC3
bta-miR-2323	NM_001001938	3777	3784	95	ENSG00000186354	C9orf47
bta-miR-2350	NM_001001995	394	401	98	ENSG00000046653	GPM6B
bta-miR-874	NM_001002026	1702	1709	96	ENSG00000066405	CLDN18
bta-miR-326	NM_001002026	1575	1582	97	ENSG00000066405	CLDN18
bta-miR-2346	NM_001002235	1628	1635	95	ENSG00000197249	SERPINA1
bta-miR-2346	NM_001002235	1628	1635	95	ENSG00000277377	SERPINA1
bta-miR-378	NM_001002235	1537	1544	97	ENSG00000197249	SERPINA1
bta-miR-378	NM_001002235	1537	1544	97	ENSG00000277377	SERPINA1
bta-miR-2346	NM_001002236	1628	1635	95	ENSG00000197249	SERPINA1
bta-miR-2346	NM_001002236	1628	1635	95	ENSG00000277377	SERPINA1
bta-miR-378	NM_001002236	1537	1544	97	ENSG00000197249	SERPINA1
bta-miR-378	NM_001002236	1537	1544	97	ENSG00000277377	SERPINA1
bta-miR-378	NM_001002258	2000	2007	99	ENSG00000154518	ATP5G3
bta-miR-1-612	NM_001002266	141	148	98	ENSG00000165406	2008-03-01
bta-miR-1-1319	NM_001002266	141	148	98	ENSG00000165406	2008-03-01
bta-miR-4-36127	NM_001002266	141	148	98	ENSG00000165406	2008-03-01
bta-miR-5-37255	NM_001002269	272	279	96	ENSG00000107371	EXOSC3
bta-miR-5-37953	NM_001002759	232	238	98	ENSG00000156384	SFR1
bta-miR-330	NM_001002796	842	849	98	ENSG00000175471	MCTP1
bta-miR-221	NM_001002838	4939	4946	95	ENSG00000196632	WNK3
bta-miR-222	NM_001002838	4939	4946	95	ENSG00000196632	WNK3
bta-miR-330	NM_001002843	1135	1142	99	ENSG00000137871	ZNF280D
bta-miR-330	NM_001002843	1193	1200	98	ENSG00000137871	ZNF280D
bta-miR-2387	NM_001002880	497	504	98	ENSG00000100211	CBY1
bta-miR-5-37953	NM_001002909	294	301	98	ENSG00000186566	GPATCH8
bta-miR-760-3p	NM_001002909	519	526	96	ENSG00000186566	GPATCH8
bta-miR-18a	NM_001002912	1987	1994	97	ENSG00000178965	ERICH3
bta-miR-27a-3p	NM_001002912	2142	2149	98	ENSG00000178965	ERICH3
bta-miR-330	NM_001003395	267	274	98	ENSG00000111907	TPD52L1
bta-miR-330	NM_001003396	386	393	98	ENSG00000111907	TPD52L1
bta-miR-330	NM_001003397	386	393	98	ENSG00000111907	TPD52L1
bta-miR-2350	NM_001003407	273	280	95	ENSG00000099204	ABLIM1
bta-miR-2350	NM_001003408	273	280	95	ENSG00000099204	ABLIM1
bta-miR-378	NM_001003678	118	125	98	ENSG00000149179	C11orf49
bta-miR-222	NM_001003679	406	413	97	ENSG00000116678	LEPR
bta-miR-221	NM_001003679	406	413	96	ENSG00000116678	LEPR
bta-miR-2323	NM_001003679	236	243	96	ENSG00000116678	LEPR
bta-miR-5-37255	NM_001003692	214	221	95	ENSG00000100319	ZMAT5
bta-miR-6529a	NM_001003790	343	350	98	ENSG00000147475	ERLIN2
bta-miR-6529a	NM_001003791	343	350	98	ENSG00000147475	ERLIN2
bta-miR-2448-3p	NM_001003792	6298	6305	99	ENSG00000144642	RBMS3
bta-miR-2448-3p	NM_001003793	6298	6305	99	ENSG00000144642	RBMS3
bta-miR-19-17220	NM_001003800	2030	2037	98	ENSG00000185963	BICD2
bta-miR-2387	NM_001003940	369	376	97	ENSG00000104081	BMF
bta-miR-2387	NM_001003942	369	376	97	ENSG00000104081	BMF
bta-miR-2387	NM_001003943	373	380	97	ENSG00000104081	BMF
bta-miR-2331-3p	NM_001004312	49	56	96	ENSG00000198471	RTP2
bta-miR-3432a	NM_001004317	364	371	97	ENSG00000187772	LIN28B
bta-miR-27a-3p	NM_001004317	117	124	97	ENSG00000187772	LIN28B
bta-miR-27a-3p	NM_001004329	1260	1267	98	ENSG00000185610	DBX2
bta-miR-149-5p	NM_001004334	282	289	96	ENSG00000276469	GPR179
bta-miR-149-5p	NM_001004334	282	289	96	ENSG00000277399	GPR179
bta-miR-5-37255	NM_001004334	745	752	96	ENSG00000276469	GPR179
bta-miR-5-37255	NM_001004334	745	752	96	ENSG00000277399	GPR179
bta-miR-505	NM_001004340	83	90	95	ENSG00000198019	FCGR1B
bta-miR-5-37255	NM_001004341	217	224	99	ENSG00000253831	ETV3L
bta-miR-2403	NM_001004440	563	570	99	ENSG00000184599	FAM19A3
bta-miR-2387	NM_001005241	61	68	99	ENSG00000183706	OR4N4
bta-miR-361	NM_001005242	1189	1196	96	ENSG00000057294	PKP2
bta-miR-25-27602	NM_001005340	310	317	98	ENSG00000136235	GPNMB
bta-miR-2350	NM_001005376	68	75	99	ENSG00000011422	PLAUR
bta-miR-25-27602	NM_001005376	108	115	97	ENSG00000011422	PLAUR
bta-miR-25-27602	NM_001005377	189	196	97	ENSG00000011422	PLAUR
bta-miR-2323	NM_001005404	4383	4390	99	ENSG00000175155	YPEL2
bta-miR-149-5p	NM_001005407	112	119	95	ENSG00000196557	CACNA1H
bta-miR-760-3p	NM_001005464	49	56	98	ENSG00000203852	HIST2H3A
bta-miR-2387	NM_001005739	629	636	99	ENSG00000143952	VPS54
bta-miR-5-37953	NM_001005743	1109	1115	95	ENSG00000133961	NUMB
bta-miR-5-37953	NM_001005744	1109	1115	95	ENSG00000133961	NUMB
bta-miR-5-37953	NM_001005745	1109	1115	95	ENSG00000133961	NUMB
bta-miR-330	NM_001006115	2518	2525	95	ENSG00000176095	IP6K1
bta-miR-2346	NM_001006610	740	747	96	ENSG00000196470	SIAH1
bta-miR-505	NM_001006612	28	35	98	ENSG00000185222	TCEAL9
bta-miR-505	NM_001006613	28	35	98	ENSG00000185222	TCEAL9
bta-miR-505	NM_001006614	28	35	98	ENSG00000185222	TCEAL9
bta-miR-378	NM_001006616	191	198	98	ENSG00000048140	TSPAN17
bta-miR-27a-3p	NM_001006624	1653	1660	99	ENSG00000162493	PDPN
bta-miR-27a-3p	NM_001006625	1653	1660	99	ENSG00000162493	PDPN
bta-miR-5-37255	NM_001006626	213	220	99	ENSG00000181072	CHRM2
bta-miR-5-37255	NM_001006627	213	220	99	ENSG00000181072	CHRM2
bta-miR-5-37255	NM_001006628	213	220	99	ENSG00000181072	CHRM2
bta-miR-5-37255	NM_001006629	213	220	99	ENSG00000181072	CHRM2
bta-miR-5-37255	NM_001006630	213	220	99	ENSG00000181072	CHRM2
bta-miR-5-37255	NM_001006631	213	220	99	ENSG00000181072	CHRM2
bta-miR-5-37255	NM_001006632	213	220	99	ENSG00000181072	CHRM2
bta-miR-760-3p	NM_001006636	138	145	96	ENSG00000121964	GTDC1
bta-miR-149-5p	NM_001006638	252	259	95	ENSG00000172794	RAB37
bta-miR-2331-3p	NM_001006944	206	213	97	ENSG00000162302	RPS6KA4
bta-miR-2323	NM_001007033	89	96	99	ENSG00000205846	CLEC6A
bta-miR-6529a	NM_001007075	125	132	98	ENSG00000109790	KLHL5
bta-miR-378	NM_001007075	3051	3058	99	ENSG00000109790	KLHL5
bta-miR-1-1319	NM_001007099	893	899	95	ENSG00000116171	SCP2
bta-miR-4-36127	NM_001007099	893	899	95	ENSG00000116171	SCP2
bta-miR-1-612	NM_001007099	893	899	95	ENSG00000116171	SCP2
bta-miR-4-36127	NM_001007100	893	899	95	ENSG00000116171	SCP2
bta-miR-1-612	NM_001007100	893	899	95	ENSG00000116171	SCP2
bta-miR-1-1319	NM_001007100	893	899	95	ENSG00000116171	SCP2
bta-miR-19-17220	NM_001007156	1783	1790	95	ENSG00000140538	NTRK3
bta-miR-326	NM_001007237	2598	2605	97	ENSG00000143061	IGSF3
bta-miR-1-1319	NM_001007250	1017	1023	95	ENSG00000116171	SCP2
bta-miR-4-36127	NM_001007250	1017	1023	95	ENSG00000116171	SCP2
bta-miR-1-612	NM_001007250	1017	1023	95	ENSG00000116171	SCP2
bta-miR-1-612	NM_001007267	674	681	98	ENSG00000153246	PLA2R1
bta-miR-1-1319	NM_001007267	674	681	98	ENSG00000153246	PLA2R1
bta-miR-4-36127	NM_001007267	674	681	98	ENSG00000153246	PLA2R1
bta-miR-326	NM_001007269	86	93	95	ENSG00000142252	GEMIN7
bta-miR-19-17220	NM_001007269	384	391	96	ENSG00000142252	GEMIN7
bta-miR-149-5p	NM_001007269	460	467	97	ENSG00000142252	GEMIN7
bta-miR-149-5p	NM_001007270	460	467	97	ENSG00000142252	GEMIN7
bta-miR-19-17220	NM_001007270	384	391	96	ENSG00000142252	GEMIN7
bta-miR-326	NM_001007270	86	93	95	ENSG00000142252	GEMIN7
bta-miR-874	NM_001007468	214	221	96	ENSG00000099956	SMARCB1
bta-miR-874	NM_001007468	214	221	96	ENSG00000275837	SMARCB1
bta-miR-25-27602	NM_001007470	112	119	99	ENSG00000083067	TRPM3
bta-miR-2387	NM_001007551	142	149	99	ENSG00000228836	CT45A5
bta-miR-6123	NM_001007561	3461	3468	98	ENSG00000167378	IRGQ
bta-miR-874	NM_001007563	165	172	98	ENSG00000137142	IGFBPL1
bta-miR-149-5p	NM_001008215	1025	1032	99	ENSG00000183513	COA5
bta-miR-326	NM_001008221	27	34	99	ENSG00000237763	AMY1A
bta-miR-11-5700	NM_001008226	1230	1237	97	ENSG00000188659	SAXO2
bta-miR-11-5700	NM_001008391	19	25	96	ENSG00000186714	CCDC73
bta-miR-19-17220	NM_001008392	3503	3510	99	ENSG00000144677	CTDSPL
bta-miR-7-42699	NM_001008392	740	747	96	ENSG00000144677	CTDSPL
bta-miR-326	NM_001008396	2142	2149	96	ENSG00000198554	WDHD1
bta-miR-505	NM_001008396	2469	2476	97	ENSG00000198554	WDHD1
bta-miR-326	NM_001008404	190	197	95	ENSG00000184601	C14orf180
bta-miR-326	NM_001008404	190	197	95	ENSG00000274126	C14orf180
bta-miR-505	NM_001008405	145	152	99	ENSG00000075790	BCAP29
bta-miR-2387	NM_001008410	2320	2327	99	ENSG00000115107	STEAP3
bta-miR-222	NM_001008528	132	139	98	ENSG00000182534	MXRA7
bta-miR-221	NM_001008528	132	139	96	ENSG00000182534	MXRA7
bta-miR-326	NM_001008529	134	141	97	ENSG00000182534	MXRA7
bta-miR-24-3p	NM_001008529	16	23	99	ENSG00000182534	MXRA7
bta-miR-505	NM_001008537	44	51	97	ENSG00000050030	KIAA2022
bta-miR-874	NM_001008541	23	30	97	ENSG00000119950	MXI1
bta-miR-330	NM_001008564	1910	1917	96	ENSG00000139496	NUP58
bta-miR-378	NM_001008657	562	569	97	ENSG00000070814	TCOF1
bta-miR-4-36127	NM_001008660	580	587	97	ENSG00000073921	PICALM
bta-miR-1-612	NM_001008660	580	587	97	ENSG00000073921	PICALM
bta-miR-1-1319	NM_001008660	580	587	97	ENSG00000073921	PICALM
bta-miR-330	NM_001008701	2746	2753	95	ENSG00000072071	ADGRL1
bta-miR-378	NM_001008708	357	363	95	ENSG00000143942	CHAC2
bta-miR-874	NM_001008709	226	233	96	ENSG00000172531	PPP1CA
bta-miR-760-3p	NM_001008800	27	34	97	ENSG00000163468	CCT3
bta-miR-25-27602	NM_001008844	859	866	99	ENSG00000096696	DSP
bta-miR-25-27602	NM_001008910	304	311	96	ENSG00000115661	STK16
bta-miR-221	NM_001009185	35	42	98	ENSG00000164398	ACSL6
bta-miR-222	NM_001009185	35	42	98	ENSG00000164398	ACSL6
bta-miR-24-27575	NM_001009554	92	99	97	ENSG00000198948	MFAP3L
bta-miR-2350	NM_001009566	979	986	96	ENSG00000171603	CLSTN1
bta-miR-378	NM_001009812	146	153	98	ENSG00000179528	LBX2
bta-miR-11-5700	NM_001009899	28	34	97	ENSG00000176542	USF3
bta-miR-505	NM_001009899	353	360	96	ENSG00000176542	USF3
bta-miR-505	NM_001009923	784	791	95	ENSG00000089063	TMEM230
bta-miR-6529a	NM_001009923	837	844	96	ENSG00000089063	TMEM230
bta-miR-6529a	NM_001009924	837	844	96	ENSG00000089063	TMEM230
bta-miR-505	NM_001009924	784	791	95	ENSG00000089063	TMEM230
bta-miR-505	NM_001009925	784	791	95	ENSG00000089063	TMEM230
bta-miR-6529a	NM_001009925	837	844	96	ENSG00000089063	TMEM230
bta-miR-760-3p	NM_001009932	960	967	99	ENSG00000013563	DNASE1L1
bta-miR-760-3p	NM_001009933	960	967	99	ENSG00000013563	DNASE1L1
bta-miR-760-3p	NM_001009934	960	967	99	ENSG00000013563	DNASE1L1
bta-miR-2346	NM_001009959	2515	2522	98	ENSG00000136541	ERMN
bta-miR-6123	NM_001009959	519	526	98	ENSG00000136541	ERMN
bta-miR-19-17220	NM_001009992	937	944	95	ENSG00000179930	ZNF648
bta-miR-24-3p	NM_001009993	4273	4280	97	ENSG00000152102	FAM168B
bta-miR-24-3p	NM_001009997	346	353	99	ENSG00000203942	C10orf62
bta-miR-221	NM_001010852	108	115	98	ENSG00000146352	CLVS2
bta-miR-222	NM_001010852	108	115	99	ENSG00000146352	CLVS2
bta-miR-27a-3p	NM_001010870	2447	2454	99	ENSG00000180113	TDRD6
bta-miR-2346	NM_001010880	133	140	97	ENSG00000280568	ZNF780A
bta-miR-2346	NM_001010880	133	140	97	ENSG00000197782	ZNF780A
bta-miR-2346	NM_001010880	637	644	99	ENSG00000280568	ZNF780A
bta-miR-2346	NM_001010880	637	644	99	ENSG00000197782	ZNF780A
bta-miR-19-17220	NM_001010889	22	29	98	ENSG00000282119	PRAMEF6
bta-miR-19-17220	NM_001010889	22	29	98	ENSG00000232423	PRAMEF6
bta-miR-6123	NM_001010891	271	278	99	ENSG00000177034	MTX3
bta-miR-149-5p	NM_001010904	1030	1037	99	ENSG00000203972	GLYATL3
bta-miR-2387	NM_001010909	1003	1010	96	ENSG00000223590	MUC21
bta-miR-2387	NM_001010909	1003	1010	96	ENSG00000206463	MUC21
bta-miR-2387	NM_001010909	1003	1010	96	ENSG00000231350	MUC21
bta-miR-2387	NM_001010909	1003	1010	96	ENSG00000204544	MUC21
bta-miR-2387	NM_001010909	1003	1010	96	ENSG00000227506	MUC21
bta-miR-2387	NM_001010909	1003	1010	96	ENSG00000234137	MUC21
bta-miR-2387	NM_001010909	1003	1010	96	ENSG00000237962	MUC21
bta-miR-6123	NM_001010924	441	448	99	ENSG00000148468	FAM171A1
bta-miR-25-27602	NM_001010926	151	158	95	ENSG00000197921	HES5
bta-miR-25-27602	NM_001010926	151	158	95	ENSG00000273529	HES5
bta-miR-149-5p	NM_001010935	23	30	99	ENSG00000116473	RAP1A
bta-miR-24-3p	NM_001010935	21	28	98	ENSG00000116473	RAP1A
bta-miR-24-3p	NM_001010942	22	29	98	ENSG00000127314	RAP1B
bta-miR-505	NM_001010986	2262	2269	97	ENSG00000101974	ATP11C
bta-miR-1-612	NM_001011513	2290	2297	96	ENSG00000163110	PDLIM5
bta-miR-1-1319	NM_001011513	2290	2297	96	ENSG00000163110	PDLIM5
bta-miR-4-36127	NM_001011513	2290	2297	96	ENSG00000163110	PDLIM5
bta-miR-2350	NM_001011515	229	236	99	ENSG00000163110	PDLIM5
bta-miR-2350	NM_001011516	229	236	99	ENSG00000163110	PDLIM5
bta-miR-2387	NM_001011655	480	487	95	ENSG00000145014	TMEM44
bta-miR-2323	NM_001011657	93	100	96	ENSG00000166432	ZMAT1
bta-miR-149-5p	NM_001011880	373	380	99	ENSG00000140839	CLEC18B
bta-miR-326	NM_001012264	670	677	98	ENSG00000206150	RNASE13
bta-miR-760-3p	NM_001012270	1735	1742	95	ENSG00000089685	BIRC5
bta-miR-760-3p	NM_001012271	1836	1843	95	ENSG00000089685	BIRC5
bta-miR-2331-3p	NM_001012276	145	152	95	ENSG00000282583	PRAMEF8
bta-miR-2331-3p	NM_001012276	145	152	95	ENSG00000278021	PRAMEF8
bta-miR-2331-3p	NM_001012276	145	152	95	ENSG00000182330	PRAMEF8
bta-miR-760-3p	NM_001012279	6297	6304	99	ENSG00000214338	SOGA3
bta-miR-2346	NM_001012320	210	217	98	ENSG00000089335	ZNF302
bta-miR-330	NM_001012419	160	167	99	ENSG00000276203	ANKRD20A3
bta-miR-330	NM_001012421	160	167	99	ENSG00000183148	ANKRD20A2
bta-miR-326	NM_001012502	82	89	98	ENSG00000160401	CFAP157
bta-miR-1-612	NM_001012509	170	177	95	ENSG00000281919	SLC45A2
bta-miR-1-612	NM_001012509	170	177	95	ENSG00000164175	SLC45A2
bta-miR-4-36127	NM_001012509	170	177	95	ENSG00000281919	SLC45A2
bta-miR-4-36127	NM_001012509	170	177	95	ENSG00000164175	SLC45A2
bta-miR-1-1319	NM_001012509	170	177	95	ENSG00000281919	SLC45A2
bta-miR-1-1319	NM_001012509	170	177	95	ENSG00000164175	SLC45A2
bta-miR-378	NM_001012511	56	63	97	ENSG00000108433	GOSR2
bta-miR-6529a	NM_001012514	1094	1100	95	ENSG00000135916	ITM2C
bta-miR-6529a	NM_001012516	1094	1100	95	ENSG00000135916	ITM2C
bta-miR-1-1319	NM_001012642	153	160	98	ENSG00000175318	GRAMD2
bta-miR-4-36127	NM_001012642	153	160	98	ENSG00000175318	GRAMD2
bta-miR-1-612	NM_001012642	153	160	98	ENSG00000175318	GRAMD2
bta-miR-5-37255	NM_001012755	3129	3136	98	ENSG00000269743	SLC25A53
bta-miR-27a-3p	NM_001012758	84	91	99	ENSG00000186364	NUDT17
bta-miR-11-5700	NM_001012964	488	494	95	ENSG00000167755	KLK6
bta-miR-11-5700	NM_001012965	488	494	96	ENSG00000167755	KLK6
bta-miR-149-5p	NM_001012984	44	51	97	ENSG00000159761	C16orf86
bta-miR-330	NM_001012985	55	62	98	ENSG00000168275	COA6
bta-miR-25-27602	NM_001012991	164	171	96	ENSG00000103550	KNOP1
bta-miR-326	NM_001012994	5784	5791	99	ENSG00000148158	SNX30
bta-miR-378	NM_001013031	3204	3211	97	ENSG00000108018	SORCS1
bta-miR-27a-3p	NM_001013399	773	780	98	ENSG00000112237	CCNC
bta-miR-1-1319	NM_001013399	419	426	98	ENSG00000112237	CCNC
bta-miR-4-36127	NM_001013399	419	426	98	ENSG00000112237	CCNC
bta-miR-1-612	NM_001013399	419	426	98	ENSG00000112237	CCNC
bta-miR-27a-3p	NM_001013415	507	514	96	ENSG00000109670	FBXW7
bta-miR-27a-3p	NM_001013415	1386	1393	95	ENSG00000109670	FBXW7
bta-miR-19-17220	NM_001013579	278	285	97	ENSG00000204195	AWAT1
bta-miR-2346	NM_001013620	113	120	98	ENSG00000175548	ALG10B
bta-miR-505	NM_001013630	328	335	96	ENSG00000204518	AADACL4
bta-miR-5-37255	NM_001013647	502	509	96	ENSG00000184949	FAM227A
bta-miR-2331-3p	NM_001013649	45	52	96	ENSG00000168887	C2orf68
bta-miR-5-37255	NM_001013693	19	26	96	ENSG00000187942	LDLRAD2
bta-miR-24-3p	NM_001013842	712	719	99	ENSG00000241852	C8orf58
bta-miR-2323	NM_001013848	256	263	99	ENSG00000138190	EXOC6
bta-miR-6529a	NM_001013848	49	56	98	ENSG00000138190	EXOC6
bta-miR-25-27602	NM_001014283	44	51	96	ENSG00000150401	DCUN1D2
bta-miR-6529a	NM_001014291	197	204	97	ENSG00000159516	SPRR2G
bta-miR-11-5700	NM_001014437	53	60	98	ENSG00000278191	CARS
bta-miR-11-5700	NM_001014437	53	60	98	ENSG00000110619	CARS
bta-miR-2448-3p	NM_001014797	66	73	98	ENSG00000156113	KCNMA1
bta-miR-149-5p	NM_001014809	16	23	98	ENSG00000072832	CRMP1
bta-miR-25-27602	NM_001014842	110	117	99	ENSG00000100926	TM9SF1
bta-miR-326	NM_001014990	1398	1405	99	ENSG00000082515	MRPL22
bta-miR-874	NM_001015045	2293	2300	97	ENSG00000138640	FAM13A
bta-miR-2323	NM_001015048	2255	2262	95	ENSG00000166170	BAG5
bta-miR-2323	NM_001015049	2255	2262	95	ENSG00000166170	BAG5
bta-miR-6529a	NM_001015891	236	242	95	ENSG00000085231	AK6
bta-miR-6529a	NM_001015891	236	242	95	ENSG00000279247	AK6
bta-miR-221	NM_001017395	238	245	96	ENSG00000172765	TMCC1
bta-miR-222	NM_001017395	238	245	95	ENSG00000172765	TMCC1
bta-miR-2387	NM_001017417	142	149	99	ENSG00000268940	CT45A1
bta-miR-27a-3p	NM_001017420	958	965	97	ENSG00000171320	ESCO2
bta-miR-24-3p	NM_001017424	161	168	99	ENSG00000082482	KCNK2
bta-miR-27a-3p	NM_001017424	1884	1891	99	ENSG00000082482	KCNK2
bta-miR-24-3p	NM_001017425	161	168	99	ENSG00000082482	KCNK2
bta-miR-27a-3p	NM_001017425	1884	1891	99	ENSG00000082482	KCNK2
bta-miR-2387	NM_001017435	153	160	99	ENSG00000269096	CT45A3
bta-miR-2387	NM_001017438	142	149	99	ENSG00000278289	CT45A6
bta-miR-6123	NM_001017440	6964	6971	97	ENSG00000183166	CALN1
bta-miR-24-3p	NM_001017523	99	106	96	ENSG00000151136	BTBD11
bta-miR-874	NM_001017919	70	77	98	ENSG00000166965	RCCD1
bta-miR-326	NM_001017921	860	867	96	ENSG00000187650	VMAC
bta-miR-326	NM_001017921	87	94	99	ENSG00000187650	VMAC
bta-miR-27a-3p	NM_001017926	56	63	98	ENSG00000165156	ZHX1
bta-miR-24-3p	NM_001017928	91	98	98	ENSG00000160124	CCDC58
bta-miR-361	NM_001017928	160	167	99	ENSG00000160124	CCDC58
bta-miR-378	NM_001017956	26	33	96	ENSG00000135506	OS9
bta-miR-378	NM_001017957	26	33	96	ENSG00000135506	OS9
bta-miR-378	NM_001017958	26	33	96	ENSG00000135506	OS9
bta-miR-24-3p	NM_001017961	88	95	99	ENSG00000188859	FAM78B
bta-miR-330	NM_001017970	2475	2482	97	ENSG00000182107	TMEM30B
bta-miR-18a	NM_001017980	3146	3153	97	ENSG00000160131	VMA21
bta-miR-505	NM_001017986	83	90	95	ENSG00000198019	FCGR1B
bta-miR-2448-3p	NM_001017992	1164	1171	99	ENSG00000169067	ACTBL2
bta-miR-326	NM_001018056	363	370	99	ENSG00000147852	VLDLR
bta-miR-361	NM_001018058	5380	5387	96	ENSG00000105967	TFEC
bta-miR-378	NM_001018058	224	231	99	ENSG00000105967	TFEC
bta-miR-149-5p	NM_001018064	1820	1827	97	ENSG00000148053	NTRK2
bta-miR-18a	NM_001018064	1933	1940	98	ENSG00000148053	NTRK2
bta-miR-760-3p	NM_001018065	5907	5914	99	ENSG00000148053	NTRK2
bta-miR-760-3p	NM_001018066	5907	5914	99	ENSG00000148053	NTRK2
bta-miR-24-3p	NM_001018072	99	106	96	ENSG00000151136	BTBD11
bta-miR-2346	NM_001018090	55	62	98	ENSG00000137878	GCOM1
bta-miR-2346	NM_001018091	168	175	96	ENSG00000137878	GCOM1
bta-miR-25-27602	NM_001018100	173	180	95	ENSG00000263155	MYZAP
bta-miR-25-27602	NM_001018100	280	287	95	ENSG00000263155	MYZAP
bta-miR-2346	NM_001018102	55	62	98	ENSG00000255529	POLR2M
bta-miR-326	NM_001023587	446	453	95	ENSG00000114770	ABCC5
bta-miR-25-27602	NM_001024074	17	24	98	ENSG00000150540	HNMT
bta-miR-222	NM_001024401	52	59	96	ENSG00000188322	SBK1
bta-miR-221	NM_001024401	52	59	98	ENSG00000188322	SBK1
bta-miR-326	NM_001024455	2012	2019	98	ENSG00000242732	RGAG4
bta-miR-18a	NM_001024593	316	323	95	ENSG00000166343	MSS51
bta-miR-760-3p	NM_001024599	53	60	99	ENSG00000203814	HIST2H2BF
bta-miR-874	NM_001024599	718	725	95	ENSG00000203814	HIST2H2BF
bta-miR-326	NM_001024611	380	387	97	ENSG00000188993	LRRC66
bta-miR-11-5700	NM_001024822	97	104	98	ENSG00000258436	RNASE12
bta-miR-2323	NM_001024847	2315	2322	98	ENSG00000163513	TGFBR2
bta-miR-11-5700	NM_001024858	17	24	97	ENSG00000070182	SPTB
bta-miR-24-3p	NM_001024957	177	184	97	ENSG00000174744	BRMS1
bta-miR-149-5p	NM_001024957	179	186	99	ENSG00000174744	BRMS1
bta-miR-1-612	NM_001025	236	243	98	ENSG00000186468	RPS23
bta-miR-1-1319	NM_001025	236	243	98	ENSG00000186468	RPS23
bta-miR-4-36127	NM_001025	236	243	98	ENSG00000186468	RPS23
bta-miR-330	NM_001025070	38	45	99	ENSG00000164587	RPS14
bta-miR-330	NM_001025071	38	45	99	ENSG00000164587	RPS14
bta-miR-11-5700	NM_001025076	5916	5923	99	ENSG00000048740	CELF2
bta-miR-11-5700	NM_001025077	7257	7264	99	ENSG00000048740	CELF2
bta-miR-2448-3p	NM_001025108	360	367	97	ENSG00000144218	AFF3
bta-miR-505	NM_001025160	552	559	96	ENSG00000123146	ADGRE5
bta-miR-505	NM_001025160	525	532	98	ENSG00000123146	ADGRE5
bta-miR-6123	NM_001025242	598	605	95	ENSG00000184216	IRAK1
bta-miR-6123	NM_001025243	598	605	95	ENSG00000184216	IRAK1
bta-miR-5-37255	NM_001025266	329	336	95	ENSG00000187068	C3orf70
bta-miR-361	NM_001025366	1643	1650	97	ENSG00000112715	VEGFA
bta-miR-361	NM_001025367	1643	1650	97	ENSG00000112715	VEGFA
bta-miR-361	NM_001025368	1643	1650	97	ENSG00000112715	VEGFA
bta-miR-361	NM_001025369	1659	1666	97	ENSG00000112715	VEGFA
bta-miR-361	NM_001025370	1643	1650	97	ENSG00000112715	VEGFA
bta-miR-2350	NM_001025389	439	446	96	ENSG00000133805	AMPD3
bta-miR-2350	NM_001025390	439	446	96	ENSG00000133805	AMPD3
bta-miR-2387	NM_001025433	666	673	97	ENSG00000181019	NQO1
bta-miR-19-17220	NM_001025433	973	980	97	ENSG00000181019	NQO1
bta-miR-2387	NM_001025434	666	673	97	ENSG00000181019	NQO1
bta-miR-19-17220	NM_001025434	973	980	97	ENSG00000181019	NQO1
bta-miR-18a	NM_001025436	139	146	98	ENSG00000144451	SPAG16
bta-miR-2346	NM_001025593	384	391	96	ENSG00000164144	ARFIP1
bta-miR-2346	NM_001025595	384	391	96	ENSG00000164144	ARFIP1
bta-miR-6529a	NM_001025598	573	580	95	ENSG00000186517	ARHGAP30
bta-miR-378	NM_001025603	353	360	95	ENSG00000143390	RFX5
bta-miR-6529a	NM_001025616	1728	1734	95	ENSG00000138639	ARHGAP24
bta-miR-2350	NM_001025778	51	58	99	ENSG00000105053	VRK3
bta-miR-25-27602	NM_001025780	964	971	99	ENSG00000107362	ABHD17B
bta-miR-330	NM_001029839	140	147	98	ENSG00000179152	TCAIM
bta-miR-330	NM_001029840	140	147	98	ENSG00000179152	TCAIM
bta-miR-2350	NM_001029851	102	109	99	ENSG00000113231	PDE8B
bta-miR-2350	NM_001029852	102	109	99	ENSG00000113231	PDE8B
bta-miR-2350	NM_001029853	102	109	99	ENSG00000113231	PDE8B
bta-miR-2350	NM_001029854	102	109	99	ENSG00000113231	PDE8B
bta-miR-27a-3p	NM_001029858	260	267	98	ENSG00000196376	SLC35F1
bta-miR-24-3p	NM_001029859	1983	1990	97	ENSG00000188997	KCTD21
bta-miR-326	NM_001029859	393	400	97	ENSG00000188997	KCTD21
bta-miR-4-36127	NM_001029871	318	325	98	ENSG00000101282	RSPO4
bta-miR-1-1319	NM_001029871	318	325	98	ENSG00000101282	RSPO4
bta-miR-1-612	NM_001029871	318	325	98	ENSG00000101282	RSPO4
bta-miR-2331-3p	NM_001029884	2141	2148	99	ENSG00000120278	PLEKHG1
bta-miR-330	NM_001029976	338	345	97	ENSG00000170631	ZNF16
bta-miR-222	NM_001029997	409	416	95	ENSG00000197841	ZNF181
bta-miR-2387	NM_001030005	1203	1210	95	ENSG00000213578	CPLX3
bta-miR-11-5700	NM_001030007	3954	3960	95	ENSG00000166747	AP1G1
bta-miR-19-17220	NM_001030010	96	103	95	ENSG00000006534	ALDH3B1
bta-miR-2387	NM_001030015	17	24	98	ENSG00000122375	OPN4
bta-miR-760-3p	NM_001030272	127	134	99	ENSG00000133794	ARNTL
bta-miR-760-3p	NM_001030273	127	134	99	ENSG00000133794	ARNTL
bta-miR-5-37953	NM_001030311	488	494	96	ENSG00000188452	CERKL
bta-miR-5-37953	NM_001030312	488	494	96	ENSG00000188452	CERKL
bta-miR-5-37953	NM_001030313	488	494	96	ENSG00000188452	CERKL
bta-miR-5-37255	NM_001031665	283	290	95	ENSG00000180257	ZNF816
bta-miR-2346	NM_001031665	43	50	99	ENSG00000180257	ZNF816
bta-miR-6123	NM_001031685	198	205	96	ENSG00000143514	TP53BP2
bta-miR-27a-3p	NM_001031689	166	173	98	ENSG00000137055	PLAA
bta-miR-25-27602	NM_001031695	575	582	95	ENSG00000100320	RBFOX2
bta-miR-25-27602	NM_001031695	575	582	95	ENSG00000277564	RBFOX2
bta-miR-874	NM_001031696	275	282	96	ENSG00000105223	PLD3
bta-miR-2387	NM_001031702	754	761	96	ENSG00000082684	SEMA5B
bta-miR-2387	NM_001031702	30	37	98	ENSG00000082684	SEMA5B
bta-miR-27a-3p	NM_001031716	78	85	99	ENSG00000173559	NABP1
bta-miR-2346	NM_001031725	184	191	99	ENSG00000118197	DDX59
bta-miR-330	NM_001031732	367	374	96	ENSG00000083896	YTHDC1
bta-miR-330	NM_001031732	367	374	96	ENSG00000275272	YTHDC1
bta-miR-2448-3p	NM_001031733	3134	3141	96	ENSG00000129007	CALML4
bta-miR-2323	NM_001031740	1310	1317	97	ENSG00000185090	MANEAL
bta-miR-24-3p	NM_001031745	107	114	95	ENSG00000158423	RIBC1
bta-miR-24-3p	NM_001031746	269	276	96	ENSG00000165633	VSTM4
bta-miR-4-36127	NM_001031853	94	101	99	ENSG00000188487	INSC
bta-miR-1-612	NM_001031853	94	101	99	ENSG00000188487	INSC
bta-miR-1-1319	NM_001031853	94	101	99	ENSG00000188487	INSC
bta-miR-25-27602	NM_001032363	30	37	96	ENSG00000173436	MINOS1
bta-miR-25-27602	NM_001032363	2467	2474	96	ENSG00000173436	MINOS1
bta-miR-149-5p	NM_001032367	584	591	96	ENSG00000166145	SPINT1
bta-miR-24-3p	NM_001032391	18	25	95	ENSG00000205629	LCMT1
bta-miR-149-5p	NM_001032391	20	27	98	ENSG00000205629	LCMT1
bta-miR-24-3p	NM_001032409	79	86	96	ENSG00000089127	OAS1
bta-miR-1-612	NM_001032730	84	91	98	ENSG00000090686	USP48
bta-miR-4-36127	NM_001032730	84	91	98	ENSG00000090686	USP48
bta-miR-1-1319	NM_001032730	84	91	98	ENSG00000090686	USP48
bta-miR-2323	NM_001032731	360	367	98	ENSG00000111335	OAS2
bta-miR-361	NM_001033045	223	230	96	ENSG00000163328	GPR155
bta-miR-330	NM_001033054	361	368	95	ENSG00000129221	AIPL1
bta-miR-330	NM_001033055	361	368	95	ENSG00000129221	AIPL1
bta-miR-330	NM_001033087	2946	2953	95	ENSG00000172264	MACROD2
bta-miR-6529a	NM_001033112	270	277	99	ENSG00000120727	PAIP2
bta-miR-6529a	NM_001033521	771	778	98	ENSG00000101138	CSTF1
bta-miR-6529a	NM_001033522	771	778	98	ENSG00000101138	CSTF1
bta-miR-2448-3p	NM_001033557	1400	1407	97	ENSG00000138032	PPM1B
bta-miR-2350	NM_001033576	356	363	97	ENSG00000141161	UNC45B
bta-miR-326	NM_001033576	1066	1073	99	ENSG00000141161	UNC45B
bta-miR-2331-3p	NM_001033576	701	708	99	ENSG00000141161	UNC45B
bta-miR-760-3p	NM_001033602	266	273	97	ENSG00000132938	MTUS2
bta-miR-5-37953	NM_001033604	367	374	99	ENSG00000122507	BBS9
bta-miR-5-37953	NM_001033605	367	374	99	ENSG00000122507	BBS9
bta-miR-361	NM_001033756	1577	1584	97	ENSG00000112715	VEGFA
bta-miR-874	NM_001034173	3496	3503	96	ENSG00000136010	ALDH1L2
bta-miR-760-3p	NM_001034833	232	239	95	ENSG00000145912	NHP2
bta-miR-2323	NM_001034845	311	318	99	ENSG00000174473	GALNTL6
bta-miR-27a-3p	NM_001035005	373	380	95	ENSG00000177576	C18orf32
bta-miR-326	NM_001035223	256	263	97	ENSG00000205517	RGL3
bta-miR-18a	NM_001035511	38	45	98	ENSG00000143252	SDHC
bta-miR-25-27602	NM_001035511	395	402	96	ENSG00000143252	SDHC
bta-miR-18a	NM_001035512	145	152	97	ENSG00000143252	SDHC
bta-miR-25-27602	NM_001035512	502	509	95	ENSG00000143252	SDHC
bta-miR-18a	NM_001035513	145	152	97	ENSG00000143252	SDHC
bta-miR-25-27602	NM_001035513	502	509	95	ENSG00000143252	SDHC
bta-miR-19-17220	NM_001037	113	120	96	ENSG00000105711	SCN1B
bta-miR-2346	NM_001037131	1335	1342	95	ENSG00000157985	AGAP1
bta-miR-24-3p	NM_001037277	368	375	96	ENSG00000152904	GGPS1
bta-miR-27a-3p	NM_001037293	84	91	96	ENSG00000243444	PALM2
bta-miR-330	NM_001037293	128	135	98	ENSG00000243444	PALM2
bta-miR-330	NM_001037328	60	67	97	ENSG00000124214	STAU1
bta-miR-25-27602	NM_001037333	40	47	98	ENSG00000055163	CYFIP2
bta-miR-149-5p	NM_001037339	134	141	96	ENSG00000184588	PDE4B
bta-miR-149-5p	NM_001037340	134	141	96	ENSG00000184588	PDE4B
bta-miR-149-5p	NM_001037341	134	141	96	ENSG00000184588	PDE4B
bta-miR-24-3p	NM_001037535	1046	1053	98	ENSG00000047634	SCML1
bta-miR-24-3p	NM_001037536	1046	1053	98	ENSG00000047634	SCML1
bta-miR-24-3p	NM_001037540	1046	1053	98	ENSG00000047634	SCML1
bta-miR-760-3p	NM_001037631	217	224	97	ENSG00000163599	CTLA4
bta-miR-6529a	NM_001037637	105	112	99	ENSG00000145741	BTF3
bta-miR-361	NM_001037637	91	98	99	ENSG00000145741	BTF3
bta-miR-24-3p	NM_001038	283	290	95	ENSG00000111319	SCNN1A
bta-miR-2350	NM_001038618	34	41	95	ENSG00000141562	NARF
bta-miR-1-1319	NM_001039091	1370	1376	95	ENSG00000101911	PRPS2
bta-miR-1-612	NM_001039091	1370	1376	95	ENSG00000101911	PRPS2
bta-miR-4-36127	NM_001039091	1370	1376	95	ENSG00000101911	PRPS2
bta-miR-2331-3p	NM_001039111	225	232	99	ENSG00000206557	TRIM71
bta-miR-326	NM_001039130	171	178	98	ENSG00000179593	ALOX15B
bta-miR-326	NM_001039130	51	58	98	ENSG00000179593	ALOX15B
bta-miR-326	NM_001039131	51	58	98	ENSG00000179593	ALOX15B
bta-miR-326	NM_001039131	171	178	98	ENSG00000179593	ALOX15B
bta-miR-24-3p	NM_001039199	134	141	98	ENSG00000124120	TTPAL
bta-miR-5-37255	NM_001039348	358	365	95	ENSG00000115380	EFEMP1
bta-miR-5-37255	NM_001039349	358	365	95	ENSG00000115380	EFEMP1
bta-miR-378	NM_001039375	23	30	99	ENSG00000101247	NDUFAF5
bta-miR-149-5p	NM_001039490	48	55	97	ENSG00000177697	CD151
bta-miR-874	NM_001039492	410	417	99	ENSG00000115641	FHL2
bta-miR-361	NM_001039538	3485	3492	95	ENSG00000078018	MAP2
bta-miR-326	NM_001039547	122	129	99	ENSG00000175066	GK5
bta-miR-2403	NM_001039580	3739	3746	96	ENSG00000164114	MAP9
bta-miR-11-5700	NM_001039580	3493	3500	98	ENSG00000164114	MAP9
bta-miR-2331-3p	NM_001039585	4235	4242	99	ENSG00000122420	PTGFR
bta-miR-222	NM_001039590	3442	3449	95	ENSG00000124486	USP9X
bta-miR-221	NM_001039590	3442	3449	97	ENSG00000124486	USP9X
bta-miR-221	NM_001039591	3442	3449	97	ENSG00000124486	USP9X
bta-miR-222	NM_001039591	3442	3449	95	ENSG00000124486	USP9X
bta-miR-326	NM_001039618	5935	5942	99	ENSG00000137504	CREBZF
bta-miR-1-612	NM_001039651	52	59	98	ENSG00000227861	SAPCD1
bta-miR-1-612	NM_001039651	52	59	98	ENSG00000228727	SAPCD1
bta-miR-1-612	NM_001039651	52	59	98	ENSG00000227074	SAPCD1
bta-miR-1-612	NM_001039651	52	59	98	ENSG00000237918	SAPCD1
bta-miR-1-612	NM_001039651	52	59	98	ENSG00000234951	SAPCD1
bta-miR-1-612	NM_001039651	52	59	98	ENSG00000229176	SAPCD1
bta-miR-4-36127	NM_001039651	52	59	98	ENSG00000227861	SAPCD1
bta-miR-4-36127	NM_001039651	52	59	98	ENSG00000228727	SAPCD1
bta-miR-4-36127	NM_001039651	52	59	98	ENSG00000227074	SAPCD1
bta-miR-4-36127	NM_001039651	52	59	98	ENSG00000237918	SAPCD1
bta-miR-4-36127	NM_001039651	52	59	98	ENSG00000234951	SAPCD1
bta-miR-4-36127	NM_001039651	52	59	98	ENSG00000229176	SAPCD1
bta-miR-1-1319	NM_001039651	52	59	98	ENSG00000227861	SAPCD1
bta-miR-1-1319	NM_001039651	52	59	98	ENSG00000228727	SAPCD1
bta-miR-1-1319	NM_001039651	52	59	98	ENSG00000227074	SAPCD1
bta-miR-1-1319	NM_001039651	52	59	98	ENSG00000237918	SAPCD1
bta-miR-1-1319	NM_001039651	52	59	98	ENSG00000234951	SAPCD1
bta-miR-1-1319	NM_001039651	52	59	98	ENSG00000229176	SAPCD1
bta-miR-27a-3p	NM_001039656	1864	1871	98	ENSG00000132749	TESMIN
bta-miR-149-5p	NM_001039661	314	321	97	ENSG00000150455	TIRAP
bta-miR-11-5700	NM_001039763	193	199	96	ENSG00000186952	TMEM232
bta-miR-25-27602	NM_001039771	81	88	97	ENSG00000139899	CBLN3
bta-miR-24-3p	NM_001039780	891	898	98	ENSG00000205089	CCNI2
bta-miR-19-17220	NM_001039792	63	70	97	ENSG00000196196	HRCT1
bta-miR-2331-3p	NM_001039888	162	169	99	ENSG00000272031	ANKRD34A
bta-miR-1-612	NM_001040	16	22	95	ENSG00000129214	SHBG
bta-miR-1-1319	NM_001040	16	22	95	ENSG00000129214	SHBG
bta-miR-4-36127	NM_001040	16	22	95	ENSG00000129214	SHBG
bta-miR-1-612	NM_001040007	318	325	98	ENSG00000101282	RSPO4
bta-miR-1-1319	NM_001040007	318	325	98	ENSG00000101282	RSPO4
bta-miR-4-36127	NM_001040007	318	325	98	ENSG00000101282	RSPO4
bta-miR-18a	NM_001040020	1378	1385	98	ENSG00000196937	FAM3C
bta-miR-326	NM_001040022	1915	1922	95	ENSG00000198053	SIRPA
bta-miR-326	NM_001040023	1915	1922	95	ENSG00000198053	SIRPA
bta-miR-6529a	NM_001040032	93	100	97	ENSG00000171060	C8orf74
bta-miR-6529a	NM_001040033	705	711	96	ENSG00000143119	CD53
bta-miR-27a-3p	NM_001040057	58	65	99	ENSG00000234545	FAM133B
bta-miR-330	NM_001040100	901	908	95	ENSG00000196542	SPTSSB
bta-miR-149-5p	NM_001040108	159	166	96	ENSG00000119684	MLH3
bta-miR-326	NM_001040109	45	52	96	ENSG00000096395	MLN
bta-miR-326	NM_001040134	1444	1451	99	ENSG00000099864	PALM
bta-miR-2323	NM_001040153	1019	1026	99	ENSG00000139737	SLAIN1
bta-miR-330	NM_001040153	436	443	96	ENSG00000139737	SLAIN1
bta-miR-330	NM_001040157	168	175	97	ENSG00000164118	CEP44
bta-miR-505	NM_001040157	279	286	95	ENSG00000164118	CEP44
bta-miR-19-17220	NM_001040177	404	411	97	ENSG00000165568	AKR1E2
bta-miR-760-3p	NM_001040185	244	251	97	ENSG00000196417	ZNF765
bta-miR-19-17220	NM_001040274	93	100	98	ENSG00000153157	SYCP2L
bta-miR-5-37255	NM_001040274	15	22	96	ENSG00000153157	SYCP2L
bta-miR-24-3p	NM_001040275	197	204	96	ENSG00000140009	ESR2
bta-miR-330	NM_001040284	5456	5463	99	ENSG00000121274	PAPD5
bta-miR-330	NM_001040285	5456	5463	99	ENSG00000121274	PAPD5
bta-miR-27a-3p	NM_001040402	3087	3094	96	ENSG00000109184	DCUN1D4
bta-miR-149-5p	NM_001040402	2440	2447	96	ENSG00000109184	DCUN1D4
bta-miR-221	NM_001040402	405	412	95	ENSG00000109184	DCUN1D4
bta-miR-6123	NM_001040458	81	88	97	ENSG00000164307	ERAP1
bta-miR-25-27602	NM_001040633	24	31	99	ENSG00000106617	PRKAG2
bta-miR-505	NM_001040633	153	160	96	ENSG00000106617	PRKAG2
bta-miR-6123	NM_001040662	334	341	96	ENSG00000100483	VCPKMT
bta-miR-19-17220	NM_001040662	185	192	97	ENSG00000100483	VCPKMT
bta-miR-19-17220	NM_001040663	156	163	98	ENSG00000205777	GAGE1
bta-miR-24-3p	NM_001040712	60	67	98	ENSG00000153707	PTPRD
bta-miR-19-17220	NM_001040716	216	223	99	ENSG00000173599	PC
bta-miR-760-3p	NM_001040874	70	77	98	ENSG00000272196	HIST2H2AA4
bta-miR-326	NM_001040876	1401	1408	95	ENSG00000164163	ABCE1
bta-miR-874	NM_001042368	458	465	95	ENSG00000160271	RALGDS
bta-miR-5-37255	NM_001042383	2766	2773	99	ENSG00000182923	CEP63
bta-miR-5-37255	NM_001042400	2766	2773	99	ENSG00000182923	CEP63
bta-miR-222	NM_001042403	778	785	96	ENSG00000136014	USP44
bta-miR-221	NM_001042403	778	785	97	ENSG00000136014	USP44
bta-miR-330	NM_001042404	1724	1731	95	ENSG00000276725	CEP170
bta-miR-330	NM_001042404	1724	1731	95	ENSG00000143702	CEP170
bta-miR-330	NM_001042405	1724	1731	95	ENSG00000276725	CEP170
bta-miR-330	NM_001042405	1724	1731	95	ENSG00000143702	CEP170
bta-miR-874	NM_001042410	128	135	97	ENSG00000163516	ANKZF1
bta-miR-27a-3p	NM_001042414	232	239	98	ENSG00000121390	PSPC1
bta-miR-6529a	NM_001042417	930	937	97	ENSG00000204130	RUFY2
bta-miR-24-3p	NM_001042424	135	142	97	ENSG00000109685	WHSC1
bta-miR-19-17220	NM_001042426	641	648	99	ENSG00000115163	CENPA
bta-miR-25-27602	NM_001042437	568	575	97	ENSG00000115525	ST3GAL5
bta-miR-326	NM_001042452	36	43	99	ENSG00000134602	STK26
bta-miR-326	NM_001042453	36	43	99	ENSG00000134602	STK26
bta-miR-19-17220	NM_001042465	805	812	99	ENSG00000197746	PSAP
bta-miR-19-17220	NM_001042466	805	812	99	ENSG00000197746	PSAP
bta-miR-326	NM_001042469	743	750	97	ENSG00000129103	SUMF2
bta-miR-326	NM_001042470	743	750	97	ENSG00000129103	SUMF2
bta-miR-6123	NM_001042482	903	910	99	ENSG00000196511	TPK1
bta-miR-24-3p	NM_001042486	106	113	96	ENSG00000080845	DLGAP4
bta-miR-25-27602	NM_001042492	3345	3352	99	ENSG00000196712	NF1
bta-miR-19-17220	NM_001042494	2516	2523	97	ENSG00000140199	SLC12A6
bta-miR-19-17220	NM_001042495	2516	2523	97	ENSG00000140199	SLC12A6
bta-miR-19-17220	NM_001042496	2516	2523	97	ENSG00000140199	SLC12A6
bta-miR-19-17220	NM_001042497	2516	2523	97	ENSG00000140199	SLC12A6
bta-miR-760-3p	NM_001042506	27	34	96	ENSG00000184388	PABPC1L2B
bta-miR-1-1319	NM_001042517	445	452	97	ENSG00000139734	DIAPH3
bta-miR-4-36127	NM_001042517	445	452	97	ENSG00000139734	DIAPH3
bta-miR-1-612	NM_001042517	445	452	97	ENSG00000139734	DIAPH3
bta-miR-378	NM_001042519	2983	2989	95	ENSG00000187699	C2orf88
bta-miR-4-36127	NM_001042519	477	484	95	ENSG00000187699	C2orf88
bta-miR-1-1319	NM_001042519	477	484	95	ENSG00000187699	C2orf88
bta-miR-1-612	NM_001042519	477	484	95	ENSG00000187699	C2orf88
bta-miR-378	NM_001042520	2983	2989	95	ENSG00000187699	C2orf88
bta-miR-4-36127	NM_001042520	477	484	95	ENSG00000187699	C2orf88
bta-miR-1-1319	NM_001042520	477	484	95	ENSG00000187699	C2orf88
bta-miR-1-612	NM_001042520	477	484	95	ENSG00000187699	C2orf88
bta-miR-4-36127	NM_001042521	477	484	95	ENSG00000187699	C2orf88
bta-miR-1-1319	NM_001042521	477	484	95	ENSG00000187699	C2orf88
bta-miR-378	NM_001042521	2983	2989	95	ENSG00000187699	C2orf88
bta-miR-1-612	NM_001042521	477	484	95	ENSG00000187699	C2orf88
bta-miR-874	NM_001042529	272	279	95	ENSG00000068120	COASY
bta-miR-874	NM_001042532	272	279	95	ENSG00000068120	COASY
bta-miR-1-612	NM_001042536	94	101	99	ENSG00000188487	INSC
bta-miR-1-1319	NM_001042536	94	101	99	ENSG00000188487	INSC
bta-miR-4-36127	NM_001042536	94	101	99	ENSG00000188487	INSC
bta-miR-330	NM_001042543	318	325	97	ENSG00000145451	GLRA3
bta-miR-2346	NM_001042550	1833	1840	96	ENSG00000136824	SMC2
bta-miR-760-3p	NM_001042550	1985	1992	98	ENSG00000136824	SMC2
bta-miR-760-3p	NM_001042551	1985	1992	98	ENSG00000136824	SMC2
bta-miR-2346	NM_001042551	1833	1840	96	ENSG00000136824	SMC2
bta-miR-24-3p	NM_001042572	155	162	97	ENSG00000173575	CHD2
bta-miR-326	NM_001042572	201	208	98	ENSG00000173575	CHD2
bta-miR-25-27602	NM_001042616	97	104	98	ENSG00000255072	PIGY
bta-miR-2350	NM_001042616	394	401	97	ENSG00000255072	PIGY
bta-miR-2331-3p	NM_001042646	790	797	97	ENSG00000182606	TRAK1
bta-miR-6529a	NM_001042669	1728	1734	95	ENSG00000138639	ARHGAP24
bta-miR-378	NM_001042683	15	22	99	ENSG00000146414	SHPRH
bta-miR-760-3p	NM_001042704	21	28	97	ENSG00000186510	CLCNKA
bta-miR-2323	NM_001042762	994	1001	99	ENSG00000132436	FIGNL1
bta-miR-19-17220	NM_001043351	522	529	95	ENSG00000143549	TPM3
bta-miR-3432a	NM_001044	187	194	95	ENSG00000142319	SLC6A3
bta-miR-3432a	NM_001044	187	194	95	ENSG00000276996	SLC6A3
bta-miR-6529a	NM_001045476	87	94	97	ENSG00000136918	WDR38
bta-miR-149-5p	NM_001045556	440	447	99	ENSG00000155926	SLA
bta-miR-2387	NM_001045556	1343	1350	95	ENSG00000155926	SLA
bta-miR-2387	NM_001045557	1343	1350	95	ENSG00000155926	SLA
bta-miR-149-5p	NM_001045557	440	447	99	ENSG00000155926	SLA
bta-miR-221	NM_001048183	149	156	96	ENSG00000204138	PHACTR4
bta-miR-2323	NM_001048183	1504	1511	95	ENSG00000204138	PHACTR4
bta-miR-760-3p	NM_001048218	109	116	99	ENSG00000142186	SCYL1
bta-miR-11-5700	NM_001048252	551	557	97	ENSG00000205279	CTXN3
bta-miR-2403	NM_001048265	84	91	98	ENSG00000160345	C9orf116
bta-miR-874	NM_001049	1817	1824	95	ENSG00000139874	SSTR1
bta-miR-11-5700	NM_001049	574	581	97	ENSG00000139874	SSTR1
bta-miR-221	NM_001071775	91	98	95	ENSG00000204899	MZT1
bta-miR-760-3p	NM_001075098	2700	2707	95	ENSG00000124615	MOCS1
bta-miR-378	NM_001076785	59	66	98	ENSG00000103064	SLC7A6
bta-miR-378	NM_001076786	3344	3351	99	ENSG00000060749	QSER1
bta-miR-18a	NM_001077180	1514	1521	95	ENSG00000197006	METTL9
bta-miR-4-36127	NM_001077181	3125	3132	98	ENSG00000081377	CDC14B
bta-miR-1-1319	NM_001077181	3125	3132	98	ENSG00000081377	CDC14B
bta-miR-1-612	NM_001077181	3125	3132	98	ENSG00000081377	CDC14B
bta-miR-18a	NM_001077186	424	431	96	ENSG00000105357	MYH14
bta-miR-222	NM_001077195	2359	2366	97	ENSG00000283009	ZNF436
bta-miR-222	NM_001077195	2359	2366	97	ENSG00000125945	ZNF436
bta-miR-221	NM_001077195	2359	2366	96	ENSG00000283009	ZNF436
bta-miR-221	NM_001077195	2359	2366	96	ENSG00000125945	ZNF436
bta-miR-330	NM_001077203	1624	1631	99	ENSG00000138468	SENP7
bta-miR-361	NM_001077206	273	280	98	ENSG00000138674	SEC31A
bta-miR-2403	NM_001077206	261	268	98	ENSG00000138674	SEC31A
bta-miR-361	NM_001077207	273	280	98	ENSG00000138674	SEC31A
bta-miR-2403	NM_001077207	261	268	98	ENSG00000138674	SEC31A
bta-miR-2403	NM_001077208	261	268	98	ENSG00000138674	SEC31A
bta-miR-361	NM_001077208	273	280	98	ENSG00000138674	SEC31A
bta-miR-2387	NM_001077268	190	197	95	ENSG00000166140	ZFYVE19
bta-miR-874	NM_001077268	227	234	97	ENSG00000166140	ZFYVE19
bta-miR-24-3p	NM_001077351	978	985	99	ENSG00000100461	RBM23
bta-miR-24-3p	NM_001077352	978	985	99	ENSG00000100461	RBM23
bta-miR-19-17220	NM_001077365	471	478	95	ENSG00000130714	POMT1
bta-miR-19-17220	NM_001077366	471	478	95	ENSG00000130714	POMT1
bta-miR-5-37255	NM_001077401	2001	2008	98	ENSG00000139567	ACVRL1
bta-miR-4-36127	NM_001077426	1402	1409	99	ENSG00000083828	ZNF586
bta-miR-1-612	NM_001077426	1402	1409	99	ENSG00000083828	ZNF586
bta-miR-326	NM_001077426	1209	1216	96	ENSG00000083828	ZNF586
bta-miR-1-1319	NM_001077426	1402	1409	99	ENSG00000083828	ZNF586
bta-miR-378	NM_001077445	2082	2088	95	ENSG00000102221	JADE3
bta-miR-4-36127	NM_001077446	143	150	98	ENSG00000274672	TSEN34
bta-miR-4-36127	NM_001077446	143	150	98	ENSG00000274078	TSEN34
bta-miR-4-36127	NM_001077446	143	150	98	ENSG00000274129	TSEN34
bta-miR-4-36127	NM_001077446	143	150	98	ENSG00000273896	TSEN34
bta-miR-4-36127	NM_001077446	143	150	98	ENSG00000275165	TSEN34
bta-miR-4-36127	NM_001077446	143	150	98	ENSG00000278622	TSEN34
bta-miR-4-36127	NM_001077446	143	150	98	ENSG00000274796	TSEN34
bta-miR-4-36127	NM_001077446	143	150	98	ENSG00000170892	TSEN34
bta-miR-4-36127	NM_001077446	143	150	98	ENSG00000278605	TSEN34
bta-miR-4-36127	NM_001077446	143	150	98	ENSG00000278712	TSEN34
bta-miR-4-36127	NM_001077446	594	600	96	ENSG00000274672	TSEN34
bta-miR-4-36127	NM_001077446	594	600	96	ENSG00000274078	TSEN34
bta-miR-4-36127	NM_001077446	594	600	96	ENSG00000274129	TSEN34
bta-miR-4-36127	NM_001077446	594	600	96	ENSG00000273896	TSEN34
bta-miR-4-36127	NM_001077446	594	600	96	ENSG00000275165	TSEN34
bta-miR-4-36127	NM_001077446	594	600	96	ENSG00000278622	TSEN34
bta-miR-4-36127	NM_001077446	594	600	96	ENSG00000274796	TSEN34
bta-miR-4-36127	NM_001077446	594	600	96	ENSG00000170892	TSEN34
bta-miR-4-36127	NM_001077446	594	600	96	ENSG00000278605	TSEN34
bta-miR-4-36127	NM_001077446	594	600	96	ENSG00000278712	TSEN34
bta-miR-1-1319	NM_001077446	143	150	98	ENSG00000274672	TSEN34
bta-miR-1-1319	NM_001077446	143	150	98	ENSG00000274078	TSEN34
bta-miR-1-1319	NM_001077446	143	150	98	ENSG00000274129	TSEN34
bta-miR-1-1319	NM_001077446	143	150	98	ENSG00000273896	TSEN34
bta-miR-1-1319	NM_001077446	143	150	98	ENSG00000275165	TSEN34
bta-miR-1-1319	NM_001077446	143	150	98	ENSG00000278622	TSEN34
bta-miR-1-1319	NM_001077446	143	150	98	ENSG00000274796	TSEN34
bta-miR-1-1319	NM_001077446	143	150	98	ENSG00000170892	TSEN34
bta-miR-1-1319	NM_001077446	143	150	98	ENSG00000278605	TSEN34
bta-miR-1-1319	NM_001077446	143	150	98	ENSG00000278712	TSEN34
bta-miR-1-1319	NM_001077446	594	600	96	ENSG00000274672	TSEN34
bta-miR-1-1319	NM_001077446	594	600	96	ENSG00000274078	TSEN34
bta-miR-1-1319	NM_001077446	594	600	96	ENSG00000274129	TSEN34
bta-miR-1-1319	NM_001077446	594	600	96	ENSG00000273896	TSEN34
bta-miR-1-1319	NM_001077446	594	600	96	ENSG00000275165	TSEN34
bta-miR-1-1319	NM_001077446	594	600	96	ENSG00000278622	TSEN34
bta-miR-1-1319	NM_001077446	594	600	96	ENSG00000274796	TSEN34
bta-miR-1-1319	NM_001077446	594	600	96	ENSG00000170892	TSEN34
bta-miR-1-1319	NM_001077446	594	600	96	ENSG00000278605	TSEN34
bta-miR-1-1319	NM_001077446	594	600	96	ENSG00000278712	TSEN34
bta-miR-1-612	NM_001077446	143	150	98	ENSG00000274672	TSEN34
bta-miR-1-612	NM_001077446	143	150	98	ENSG00000274078	TSEN34
bta-miR-1-612	NM_001077446	143	150	98	ENSG00000274129	TSEN34
bta-miR-1-612	NM_001077446	143	150	98	ENSG00000273896	TSEN34
bta-miR-1-612	NM_001077446	143	150	98	ENSG00000275165	TSEN34
bta-miR-1-612	NM_001077446	143	150	98	ENSG00000278622	TSEN34
bta-miR-1-612	NM_001077446	143	150	98	ENSG00000274796	TSEN34
bta-miR-1-612	NM_001077446	143	150	98	ENSG00000170892	TSEN34
bta-miR-1-612	NM_001077446	143	150	98	ENSG00000278605	TSEN34
bta-miR-1-612	NM_001077446	143	150	98	ENSG00000278712	TSEN34
bta-miR-1-612	NM_001077446	594	600	96	ENSG00000274672	TSEN34
bta-miR-1-612	NM_001077446	594	600	96	ENSG00000274078	TSEN34
bta-miR-1-612	NM_001077446	594	600	96	ENSG00000274129	TSEN34
bta-miR-1-612	NM_001077446	594	600	96	ENSG00000273896	TSEN34
bta-miR-1-612	NM_001077446	594	600	96	ENSG00000275165	TSEN34
bta-miR-1-612	NM_001077446	594	600	96	ENSG00000278622	TSEN34
bta-miR-1-612	NM_001077446	594	600	96	ENSG00000274796	TSEN34
bta-miR-1-612	NM_001077446	594	600	96	ENSG00000170892	TSEN34
bta-miR-1-612	NM_001077446	594	600	96	ENSG00000278605	TSEN34
bta-miR-1-612	NM_001077446	594	600	96	ENSG00000278712	TSEN34
bta-miR-2387	NM_001077500	1747	1754	98	ENSG00000129451	KLK10
bta-miR-19-17220	NM_001077511	207	214	98	ENSG00000224379	TCF19
bta-miR-19-17220	NM_001077511	207	214	98	ENSG00000206455	TCF19
bta-miR-19-17220	NM_001077511	207	214	98	ENSG00000224941	TCF19
bta-miR-19-17220	NM_001077511	207	214	98	ENSG00000233890	TCF19
bta-miR-19-17220	NM_001077511	207	214	98	ENSG00000224472	TCF19
bta-miR-19-17220	NM_001077511	207	214	98	ENSG00000234674	TCF19
bta-miR-19-17220	NM_001077511	207	214	98	ENSG00000137310	TCF19
bta-miR-760-3p	NM_001077511	26	33	96	ENSG00000224379	TCF19
bta-miR-760-3p	NM_001077511	26	33	96	ENSG00000206455	TCF19
bta-miR-760-3p	NM_001077511	26	33	96	ENSG00000224941	TCF19
bta-miR-760-3p	NM_001077511	26	33	96	ENSG00000233890	TCF19
bta-miR-760-3p	NM_001077511	26	33	96	ENSG00000224472	TCF19
bta-miR-760-3p	NM_001077511	26	33	96	ENSG00000234674	TCF19
bta-miR-760-3p	NM_001077511	26	33	96	ENSG00000137310	TCF19
bta-miR-2387	NM_001077620	288	295	95	ENSG00000214140	PRCD
bta-miR-2350	NM_001077639	205	212	99	ENSG00000137634	NXPE4
bta-miR-326	NM_001077690	16	23	98	ENSG00000086848	ALG9
bta-miR-24-27575	NM_001077690	279	286	98	ENSG00000086848	ALG9
bta-miR-24-27575	NM_001077691	279	286	98	ENSG00000086848	ALG9
bta-miR-326	NM_001077691	16	23	98	ENSG00000086848	ALG9
bta-miR-24-27575	NM_001077692	279	286	98	ENSG00000086848	ALG9
bta-miR-326	NM_001077692	16	23	98	ENSG00000086848	ALG9
bta-miR-149-5p	NM_001077693	262	269	98	ENSG00000249751	ECSCR
bta-miR-326	NM_001078171	550	557	98	ENSG00000134590	FAM127A
bta-miR-221	NM_001079515	31	38	97	ENSG00000282984	TBCE
bta-miR-221	NM_001079515	31	38	97	ENSG00000116957	TBCE
bta-miR-222	NM_001079515	31	38	97	ENSG00000282984	TBCE
bta-miR-222	NM_001079515	31	38	97	ENSG00000116957	TBCE
bta-miR-2387	NM_001079518	294	301	95	ENSG00000008838	MED24
bta-miR-505	NM_001079526	85	92	98	ENSG00000030419	IKZF2
bta-miR-330	NM_001079526	298	305	98	ENSG00000030419	IKZF2
bta-miR-874	NM_001079669	558	565	98	ENSG00000125247	TMTC4
bta-miR-378	NM_001079670	1622	1629	95	ENSG00000102547	CAB39L
bta-miR-2387	NM_001079670	1307	1314	95	ENSG00000102547	CAB39L
bta-miR-760-3p	NM_001079670	215	222	98	ENSG00000102547	CAB39L
bta-miR-221	NM_001079673	2141	2148	98	ENSG00000102531	FNDC3A
bta-miR-18a	NM_001079673	159	166	96	ENSG00000102531	FNDC3A
bta-miR-222	NM_001079673	2141	2148	99	ENSG00000102531	FNDC3A
bta-miR-326	NM_001079673	1803	1810	96	ENSG00000102531	FNDC3A
bta-miR-326	NM_001079684	1026	1033	95	ENSG00000122203	KIAA1191
bta-miR-25-27602	NM_001079684	809	816	99	ENSG00000122203	KIAA1191
bta-miR-326	NM_001079685	1026	1033	95	ENSG00000122203	KIAA1191
bta-miR-25-27602	NM_001079685	809	816	99	ENSG00000122203	KIAA1191
bta-miR-24-3p	NM_001079802	123	130	97	ENSG00000106692	FKTN
bta-miR-27a-3p	NM_001079817	193	200	95	ENSG00000171105	INSR
bta-miR-1-1319	NM_001079821	50	56	96	ENSG00000162711	NLRP3
bta-miR-1-612	NM_001079821	50	56	96	ENSG00000162711	NLRP3
bta-miR-4-36127	NM_001079821	50	56	96	ENSG00000162711	NLRP3
bta-miR-221	NM_001079843	1779	1786	95	ENSG00000130940	CASZ1
bta-miR-25-27602	NM_001079858	961	968	95	ENSG00000173698	ADGRG2
bta-miR-25-27602	NM_001079859	961	968	95	ENSG00000173698	ADGRG2
bta-miR-25-27602	NM_001079860	961	968	95	ENSG00000173698	ADGRG2
bta-miR-19-17220	NM_001079866	46	53	99	ENSG00000074582	BCS1L
bta-miR-19-17220	NM_001079878	624	631	95	ENSG00000144191	CNGA3
bta-miR-2331-3p	NM_001080	2610	2617	97	ENSG00000112294	ALDH5A1
bta-miR-27a-3p	NM_001080	2961	2968	98	ENSG00000112294	ALDH5A1
bta-miR-2350	NM_001080121	1349	1356	99	ENSG00000171867	PRNP
bta-miR-2350	NM_001080122	1349	1356	99	ENSG00000171867	PRNP
bta-miR-2350	NM_001080123	1349	1356	99	ENSG00000171867	PRNP
bta-miR-505	NM_001080391	114	121	99	ENSG00000067066	SP100
bta-miR-2387	NM_001080392	338	345	95	ENSG00000257093	KIAA1147
bta-miR-2387	NM_001080392	338	345	95	ENSG00000262599	KIAA1147
bta-miR-760-3p	NM_001080395	838	845	96	ENSG00000181409	AATK
bta-miR-5-37255	NM_001080396	116	123	95	ENSG00000204442	FAM155A
bta-miR-25-27602	NM_001080398	1282	1289	99	ENSG00000136813	KIAA0368
bta-miR-149-5p	NM_001080412	3599	3606	96	ENSG00000177311	ZBTB38
bta-miR-874	NM_001080425	153	160	99	ENSG00000102409	BEX4
bta-miR-5-37255	NM_001080435	152	159	97	ENSG00000156232	WHAMM
bta-miR-18a	NM_001080439	2147	2154	99	ENSG00000176160	HSF5
bta-miR-5-37255	NM_001080450	3397	3404	98	ENSG00000178409	BEND3
bta-miR-2331-3p	NM_001080462	329	336	98	ENSG00000187806	TMEM202
bta-miR-7-42699	NM_001080469	586	593	96	ENSG00000177051	FBXO46
bta-miR-25-27602	NM_001080471	1220	1227	96	ENSG00000187800	PEAR1
bta-miR-361	NM_001080474	80	86	95	ENSG00000187833	C2orf78
bta-miR-2350	NM_001080475	327	334	95	ENSG00000178385	PLEKHM3
bta-miR-2387	NM_001080480	698	705	95	ENSG00000172197	MBOAT1
bta-miR-2331-3p	NM_001080480	138	145	99	ENSG00000172197	MBOAT1
bta-miR-27a-3p	NM_001080495	751	758	99	ENSG00000182095	TNRC18
bta-miR-6529a	NM_001080504	205	212	99	ENSG00000177483	RBM44
bta-miR-361	NM_001080504	707	714	98	ENSG00000177483	RBM44
bta-miR-25-27602	NM_001080512	43	50	99	ENSG00000122870	BICC1
bta-miR-2387	NM_001080523	191	198	96	ENSG00000205784	ARRDC5
bta-miR-2448-3p	NM_001080538	157	164	98	ENSG00000227471	AKR1B15
bta-miR-2350	NM_001080554	657	664	96	ENSG00000111305	GSG1
bta-miR-2350	NM_001080555	413	420	96	ENSG00000111305	GSG1
bta-miR-1-1319	NM_001080744	2425	2432	97	ENSG00000058866	DGKG
bta-miR-1-612	NM_001080744	2425	2432	97	ENSG00000058866	DGKG
bta-miR-4-36127	NM_001080744	2694	2700	96	ENSG00000058866	DGKG
bta-miR-2448-3p	NM_001080744	21	28	97	ENSG00000058866	DGKG
bta-miR-1-612	NM_001080744	2694	2700	96	ENSG00000058866	DGKG
bta-miR-1-1319	NM_001080744	2694	2700	96	ENSG00000058866	DGKG
bta-miR-4-36127	NM_001080744	2425	2432	97	ENSG00000058866	DGKG
bta-miR-2448-3p	NM_001080745	21	28	97	ENSG00000058866	DGKG
bta-miR-1-612	NM_001080745	2694	2700	96	ENSG00000058866	DGKG
bta-miR-1-1319	NM_001080745	2425	2432	97	ENSG00000058866	DGKG
bta-miR-4-36127	NM_001080745	2425	2432	97	ENSG00000058866	DGKG
bta-miR-1-612	NM_001080745	2425	2432	97	ENSG00000058866	DGKG
bta-miR-4-36127	NM_001080745	2694	2700	96	ENSG00000058866	DGKG
bta-miR-1-1319	NM_001080745	2694	2700	96	ENSG00000058866	DGKG
bta-miR-4-36127	NM_001080821	38	45	99	ENSG00000196466	ZNF799
bta-miR-1-612	NM_001080821	38	45	99	ENSG00000196466	ZNF799
bta-miR-1-1319	NM_001080821	38	45	99	ENSG00000196466	ZNF799
bta-miR-505	NM_001080850	124	131	97	ENSG00000186409	CCDC30
bta-miR-2323	NM_001081442	142	149	98	ENSG00000273991	LILRB5
bta-miR-2323	NM_001081442	142	149	98	ENSG00000274311	LILRB5
bta-miR-2323	NM_001081442	142	149	98	ENSG00000105609	LILRB5
bta-miR-2323	NM_001081442	142	149	98	ENSG00000278437	LILRB5
bta-miR-2323	NM_001081442	142	149	98	ENSG00000277414	LILRB5
bta-miR-2323	NM_001081443	142	149	98	ENSG00000273991	LILRB5
bta-miR-2323	NM_001081443	142	149	98	ENSG00000274311	LILRB5
bta-miR-2323	NM_001081443	142	149	98	ENSG00000105609	LILRB5
bta-miR-2323	NM_001081443	142	149	98	ENSG00000278437	LILRB5
bta-miR-2323	NM_001081443	142	149	98	ENSG00000277414	LILRB5
bta-miR-25-27602	NM_001081461	3142	3149	96	ENSG00000070495	JMJD6
bta-miR-25-27602	NM_001081491	29	36	96	ENSG00000162231	NXF1
bta-miR-874	NM_001081559	766	773	98	ENSG00000160917	CPSF4
bta-miR-5-37255	NM_001081573	305	312	95	ENSG00000160219	GAB3
bta-miR-2323	NM_001081637	123	130	97	ENSG00000104972	LILRB1
bta-miR-2323	NM_001081637	123	130	97	ENSG00000277134	LILRB1
bta-miR-2323	NM_001081637	123	130	97	ENSG00000277807	LILRB1
bta-miR-2323	NM_001081637	123	130	97	ENSG00000274669	LILRB1
bta-miR-2323	NM_001081638	123	130	97	ENSG00000104972	LILRB1
bta-miR-2323	NM_001081638	123	130	97	ENSG00000277134	LILRB1
bta-miR-2323	NM_001081638	123	130	97	ENSG00000277807	LILRB1
bta-miR-2323	NM_001081638	123	130	97	ENSG00000274669	LILRB1
bta-miR-2323	NM_001081639	123	130	97	ENSG00000104972	LILRB1
bta-miR-2323	NM_001081639	123	130	97	ENSG00000277134	LILRB1
bta-miR-2323	NM_001081639	123	130	97	ENSG00000277807	LILRB1
bta-miR-2323	NM_001081639	123	130	97	ENSG00000274669	LILRB1
bta-miR-326	NM_001081640	97	104	95	ENSG00000253729	PRKDC
bta-miR-2350	NM_001081686	1422	1429	97	ENSG00000278373	G6PC2
bta-miR-2350	NM_001081686	1422	1429	97	ENSG00000152254	G6PC2
bta-miR-874	NM_001081752	158	165	95	ENSG00000049540	ELN
bta-miR-874	NM_001081753	158	165	95	ENSG00000049540	ELN
bta-miR-874	NM_001081754	158	165	95	ENSG00000049540	ELN
bta-miR-874	NM_001081755	158	165	95	ENSG00000049540	ELN
bta-miR-2448-3p	NM_001082	614	621	97	ENSG00000186115	CYP4F2
bta-miR-27a-3p	NM_001082533	43	50	95	ENSG00000154975	CA10
bta-miR-27a-3p	NM_001082534	43	50	95	ENSG00000154975	CA10
bta-miR-25-27602	NM_001082576	575	582	95	ENSG00000100320	RBFOX2
bta-miR-25-27602	NM_001082576	575	582	95	ENSG00000277564	RBFOX2
bta-miR-25-27602	NM_001082577	565	572	96	ENSG00000100320	RBFOX2
bta-miR-25-27602	NM_001082577	565	572	96	ENSG00000277564	RBFOX2
bta-miR-25-27602	NM_001082578	575	582	95	ENSG00000100320	RBFOX2
bta-miR-25-27602	NM_001082578	575	582	95	ENSG00000277564	RBFOX2
bta-miR-25-27602	NM_001082579	575	582	95	ENSG00000100320	RBFOX2
bta-miR-25-27602	NM_001082579	575	582	95	ENSG00000277564	RBFOX2
bta-miR-330	NM_001083535	670	677	99	ENSG00000183137	CEP57L1
bta-miR-326	NM_001083536	181	188	95	ENSG00000127084	FGD3
bta-miR-361	NM_001083537	58	65	98	ENSG00000186523	FAM86B1
bta-miR-2323	NM_001083588	324	331	97	ENSG00000133740	E2F5
bta-miR-2323	NM_001083589	324	331	97	ENSG00000133740	E2F5
bta-miR-11-5700	NM_001083591	5916	5923	99	ENSG00000048740	CELF2
bta-miR-326	NM_001083592	77	84	99	ENSG00000185483	ROR1
bta-miR-6529a	NM_001083592	176	183	98	ENSG00000185483	ROR1
bta-miR-874	NM_001083592	499	506	96	ENSG00000185483	ROR1
bta-miR-2323	NM_001083602	2819	2826	98	ENSG00000185920	PTCH1
bta-miR-2323	NM_001083603	2819	2826	98	ENSG00000185920	PTCH1
bta-miR-2323	NM_001083604	2819	2826	98	ENSG00000185920	PTCH1
bta-miR-2323	NM_001083605	2819	2826	98	ENSG00000185920	PTCH1
bta-miR-2323	NM_001083606	2819	2826	98	ENSG00000185920	PTCH1
bta-miR-2323	NM_001083607	2819	2826	98	ENSG00000185920	PTCH1
bta-miR-2350	NM_001083608	34	41	95	ENSG00000141562	NARF
bta-miR-5-37255	NM_001083619	2412	2419	98	ENSG00000120251	GRIA2
bta-miR-5-37255	NM_001083620	2412	2419	98	ENSG00000120251	GRIA2
bta-miR-5-37953	NM_001083893	1337	1343	97	ENSG00000196792	STRN3
bta-miR-361	NM_001083893	290	297	95	ENSG00000196792	STRN3
bta-miR-6529a	NM_001083910	847	854	98	ENSG00000101307	SIRPB1
bta-miR-2346	NM_001083924	2919	2926	95	ENSG00000182795	C1orf116
bta-miR-2331-3p	NM_001083926	283	290	96	ENSG00000162174	ASRGL1
bta-miR-760-3p	NM_001083963	859	866	99	ENSG00000182134	TDRKH
bta-miR-760-3p	NM_001083964	859	866	99	ENSG00000182134	TDRKH
bta-miR-760-3p	NM_001083965	859	866	99	ENSG00000182134	TDRKH
bta-miR-149-5p	NM_001085384	912	919	98	ENSG00000179909	ZNF154
bta-miR-25-27602	NM_001085384	1151	1158	99	ENSG00000179909	ZNF154
bta-miR-2323	NM_001085400	659	666	97	ENSG00000181826	RELL1
bta-miR-5-37255	NM_001085401	35	42	96	ENSG00000185689	C6orf201
bta-miR-326	NM_001085411	1491	1498	96	ENSG00000152620	NADK2
bta-miR-5-37255	NM_001085429	137	144	98	ENSG00000214128	TMEM213
bta-miR-361	NM_001085447	170	177	99	ENSG00000154479	CCDC173
bta-miR-2387	NM_001085476	663	670	98	ENSG00000273514	FOXD4L6
bta-miR-1-612	NM_001085487	4567	4573	97	ENSG00000162601	MYSM1
bta-miR-4-36127	NM_001085487	4567	4573	97	ENSG00000162601	MYSM1
bta-miR-1-1319	NM_001085487	4567	4573	97	ENSG00000162601	MYSM1
bta-miR-222	NM_001093772	1899	1906	99	ENSG00000157404	KIT
bta-miR-221	NM_001093772	1899	1906	98	ENSG00000157404	KIT
bta-miR-11-5700	NM_001097615	381	388	97	ENSG00000168255	POLR2J3
bta-miR-25-27602	NM_001097633	36	43	99	ENSG00000187210	GCNT1
bta-miR-25-27602	NM_001097634	36	43	99	ENSG00000187210	GCNT1
bta-miR-25-27602	NM_001097635	36	43	99	ENSG00000187210	GCNT1
bta-miR-25-27602	NM_001097636	36	43	99	ENSG00000187210	GCNT1
bta-miR-361	NM_001098209	473	480	96	ENSG00000168036	CTNNB1
bta-miR-330	NM_001098210	155	162	97	ENSG00000168036	CTNNB1
bta-miR-361	NM_001098210	314	321	96	ENSG00000168036	CTNNB1
bta-miR-330	NM_001098268	806	813	99	ENSG00000174405	LIG4
bta-miR-18a	NM_001098272	1644	1651	99	ENSG00000112972	HMGCS1
bta-miR-1-1319	NM_001098398	630	637	97	ENSG00000122218	COPA
bta-miR-1-612	NM_001098398	630	637	97	ENSG00000122218	COPA
bta-miR-4-36127	NM_001098398	630	637	97	ENSG00000122218	COPA
bta-miR-6529a	NM_001098414	35	42	97	ENSG00000172888	ZNF621
bta-miR-11-5700	NM_001098416	1005	1012	98	ENSG00000061273	HDAC7
bta-miR-6123	NM_001098426	820	827	96	ENSG00000108604	SMARCD2
bta-miR-1-612	NM_001098426	581	588	96	ENSG00000108604	SMARCD2
bta-miR-1-1319	NM_001098426	581	588	96	ENSG00000108604	SMARCD2
bta-miR-4-36127	NM_001098426	581	588	96	ENSG00000108604	SMARCD2
bta-miR-505	NM_001098477	3713	3720	96	ENSG00000132463	GRSF1
bta-miR-149-5p	NM_001098484	3829	3836	99	ENSG00000080493	SLC4A4
bta-miR-19-17220	NM_001098504	167	174	98	ENSG00000100201	DDX17
bta-miR-2331-3p	NM_001098510	824	831	95	ENSG00000174516	PELI3
bta-miR-2448-3p	NM_001098510	1017	1024	97	ENSG00000174516	PELI3
bta-miR-1-612	NM_001098517	457	464	97	ENSG00000182985	CADM1
bta-miR-1-1319	NM_001098517	457	464	97	ENSG00000182985	CADM1
bta-miR-4-36127	NM_001098517	457	464	97	ENSG00000182985	CADM1
bta-miR-330	NM_001098520	94	101	97	ENSG00000109854	HTATIP2
bta-miR-330	NM_001098521	94	101	97	ENSG00000109854	HTATIP2
bta-miR-330	NM_001098522	94	101	97	ENSG00000109854	HTATIP2
bta-miR-27a-3p	NM_001098576	1905	1912	98	ENSG00000139644	TMBIM6
bta-miR-149-5p	NM_001098616	29	36	97	ENSG00000143612	C1orf43
bta-miR-2387	NM_001098616	559	566	99	ENSG00000143612	C1orf43
bta-miR-19-17220	NM_001098632	552	559	95	ENSG00000204673	AKT1S1
bta-miR-19-17220	NM_001098633	552	559	95	ENSG00000204673	AKT1S1
bta-miR-6123	NM_001098638	260	267	97	ENSG00000166439	RNF169
bta-miR-222	NM_001098725	693	700	97	ENSG00000100721	TCL1A
bta-miR-221	NM_001098725	693	700	97	ENSG00000100721	TCL1A
bta-miR-24-3p	NM_001098783	180	187	95	ENSG00000163684	RPP14
bta-miR-330	NM_001098805	160	167	99	ENSG00000172014	ANKRD20A4
bta-miR-2331-3p	NM_001099221	429	436	98	ENSG00000255833	TIFAB
bta-miR-5-37953	NM_001099222	85	91	97	ENSG00000096872	IFT74
bta-miR-5-37953	NM_001099223	85	91	97	ENSG00000096872	IFT74
bta-miR-760-3p	NM_001099287	59	66	97	ENSG00000172548	NIPAL4
bta-miR-6123	NM_001099289	918	925	99	ENSG00000172985	SH3RF3
bta-miR-505	NM_001099400	82	89	97	ENSG00000127990	SGCE
bta-miR-505	NM_001099401	116	123	96	ENSG00000127990	SGCE
bta-miR-27a-3p	NM_001099402	637	644	99	ENSG00000090061	CCNK
bta-miR-330	NM_001099403	746	753	98	ENSG00000152784	PRDM8
bta-miR-6529a	NM_001099412	2403	2410	97	ENSG00000083168	KAT6A
bta-miR-6529a	NM_001099413	2403	2410	97	ENSG00000083168	KAT6A
bta-miR-2346	NM_001099437	51	58	99	ENSG00000168661	ZNF30
bta-miR-2346	NM_001099438	51	58	99	ENSG00000168661	ZNF30
bta-miR-2346	NM_001099638	52	59	98	ENSG00000167635	ZNF146
bta-miR-2346	NM_001099639	52	59	98	ENSG00000167635	ZNF146
bta-miR-2403	NM_001099640	425	432	95	ENSG00000166292	TMEM100
bta-miR-149-5p	NM_001099652	197	204	98	ENSG00000180998	GPR137C
bta-miR-361	NM_001099653	72	79	97	ENSG00000158483	FAM86C1
bta-miR-5-37953	NM_001099658	343	349	95	ENSG00000173114	LRRN3
bta-miR-5-37953	NM_001099660	343	349	95	ENSG00000173114	LRRN3
bta-miR-760-3p	NM_001099668	548	555	95	ENSG00000181061	HIGD1A
bta-miR-760-3p	NM_001099669	548	555	95	ENSG00000181061	HIGD1A
bta-miR-11-5700	NM_001099773	226	233	99	ENSG00000140459	CYP11A1
bta-miR-2331-3p	NM_001099790	138	145	95	ENSG00000282792
bta-miR-2331-3p	NM_001099850	138	145	95	ENSG00000282212	PRAMEF18
bta-miR-2331-3p	NM_001099850	138	145	95	ENSG00000279804	PRAMEF18
bta-miR-2331-3p	NM_001099850	138	145	95	ENSG00000277853	PRAMEF18
bta-miR-2387	NM_001099952	951	958	96	ENSG00000150995	ITPR1
bta-miR-5-37953	NM_001100117	233	239	95	ENSG00000176406	RIMS2
bta-miR-2346	NM_001100388	64	71	99	ENSG00000183644	C11orf88
bta-miR-27a-3p	NM_001100391	41	48	97	ENSG00000184672	RALYL
bta-miR-27a-3p	NM_001100392	41	48	97	ENSG00000184672	RALYL
bta-miR-27a-3p	NM_001100393	41	48	97	ENSG00000184672	RALYL
bta-miR-1-1319	NM_001100396	531	538	98	ENSG00000177994	C2orf73
bta-miR-1-612	NM_001100396	531	538	98	ENSG00000177994	C2orf73
bta-miR-4-36127	NM_001100396	531	538	98	ENSG00000177994	C2orf73
bta-miR-6529a	NM_001100409	2489	2495	96	ENSG00000112701	SENP6
bta-miR-24-3p	NM_001100422	2822	2829	97	ENSG00000196141	SPATS2L
bta-miR-24-3p	NM_001100422	2918	2925	99	ENSG00000196141	SPATS2L
bta-miR-24-3p	NM_001100423	2822	2829	97	ENSG00000196141	SPATS2L
bta-miR-24-3p	NM_001100423	2918	2925	99	ENSG00000196141	SPATS2L
bta-miR-24-3p	NM_001100424	2822	2829	97	ENSG00000196141	SPATS2L
bta-miR-24-3p	NM_001100424	2918	2925	99	ENSG00000196141	SPATS2L
bta-miR-7-42699	NM_001100426	1231	1238	96	ENSG00000138698	RAP1GDS1
bta-miR-7-42699	NM_001100427	1231	1238	96	ENSG00000138698	RAP1GDS1
bta-miR-7-42699	NM_001100428	1231	1238	96	ENSG00000138698	RAP1GDS1
bta-miR-7-42699	NM_001100429	1231	1238	96	ENSG00000138698	RAP1GDS1
bta-miR-7-42699	NM_001100430	1231	1238	96	ENSG00000138698	RAP1GDS1
bta-miR-2346	NM_001100431	246	253	96	ENSG00000155659	VSIG4
bta-miR-2323	NM_001100431	376	383	96	ENSG00000155659	VSIG4
bta-miR-505	NM_001100592	142	149	98	ENSG00000171130	ATP6V0E2
bta-miR-330	NM_001100592	117	124	96	ENSG00000171130	ATP6V0E2
bta-miR-2387	NM_001100595	196	203	97	ENSG00000182628	SKA2
bta-miR-326	NM_001100600	847	854	95	ENSG00000136297	MMD2
bta-miR-326	NM_001100624	244	251	97	ENSG00000166451	CENPN
bta-miR-25-27602	NM_001100626	146	153	98	ENSG00000107566	ERLIN1
bta-miR-27a-3p	NM_001100874	122	129	99	ENSG00000164037	SLC9B1
bta-miR-2331-3p	NM_001100878	909	916	98	ENSG00000277781	MROH6
bta-miR-2331-3p	NM_001100878	909	916	98	ENSG00000204839	MROH6
bta-miR-2448-3p	NM_001100910	998	1005	99	ENSG00000188610	FAM72B
bta-miR-19-17220	NM_001100912	227	234	98	ENSG00000165626	BEND7
bta-miR-6529a	NM_001101676	7744	7751	99	ENSG00000177570	SAMD12
bta-miR-378	NM_001102	626	633	98	ENSG00000072110	ACTN1
bta-miR-221	NM_001102396	395	402	95	ENSG00000052723	SIKE1
bta-miR-222	NM_001102396	395	402	95	ENSG00000052723	SIKE1
bta-miR-2346	NM_001102406	157	164	98	ENSG00000073331	ALPK1
bta-miR-361	NM_001102416	272	279	96	ENSG00000113889	KNG1
bta-miR-2346	NM_001102603	111	118	97	ENSG00000170949	ZNF160
bta-miR-222	NM_001102654	52	59	98	ENSG00000185652	NTF3
bta-miR-221	NM_001102654	52	59	97	ENSG00000185652	NTF3
bta-miR-2448-3p	NM_001102658	605	612	96	ENSG00000225362	CT62
bta-miR-6123	NM_001103176	238	245	98	ENSG00000146910	CNPY1
bta-miR-1-1319	NM_001104544	2170	2177	99	ENSG00000125355	TMEM255A
bta-miR-4-36127	NM_001104544	2170	2177	99	ENSG00000125355	TMEM255A
bta-miR-1-612	NM_001104544	2170	2177	99	ENSG00000125355	TMEM255A
bta-miR-4-36127	NM_001104545	2170	2177	99	ENSG00000125355	TMEM255A
bta-miR-1-1319	NM_001104545	2170	2177	99	ENSG00000125355	TMEM255A
bta-miR-1-612	NM_001104545	2170	2177	99	ENSG00000125355	TMEM255A
bta-miR-326	NM_001104558	164	171	98	ENSG00000164181	ELOVL7
bta-miR-361	NM_001104586	215	222	95	ENSG00000138380	CARF
bta-miR-3432a	NM_001105203	393	400	97	ENSG00000160753	RUSC1
bta-miR-3432a	NM_001105204	393	400	97	ENSG00000160753	RUSC1
bta-miR-3432a	NM_001105205	393	400	97	ENSG00000160753	RUSC1
bta-miR-2403	NM_001105214	93	100	96	ENSG00000129691	ASH2L
bta-miR-149-5p	NM_001105243	4132	4139	96	ENSG00000165194	PCDH19
bta-miR-3432a	NM_001105250	86	93	96	ENSG00000021645	NRXN3
bta-miR-24-3p	NM_001105518	228	235	99	ENSG00000116668	SWT1
bta-miR-24-27575	NM_001105521	43	50	97	ENSG00000188385	JAKMIP3
bta-miR-2346	NM_001105531	321	328	98	ENSG00000082269	FAM135A
bta-miR-24-3p	NM_001105541	287	294	99	ENSG00000104722	NEFM
bta-miR-2346	NM_001105545	427	434	95	ENSG00000093144	ECHDC1
bta-miR-330	NM_001105558	413	420	95	ENSG00000214102	WEE2
bta-miR-330	NM_001105558	413	420	95	ENSG00000263042	WEE2
bta-miR-27a-3p	NM_001105573	3748	3755	96	ENSG00000174013	FBXO45
bta-miR-874	NM_001105573	601	608	96	ENSG00000174013	FBXO45
bta-miR-27a-3p	NM_001105659	73	80	99	ENSG00000162620	LRRIQ3
bta-miR-326	NM_001109662	1809	1816	97	ENSG00000173064	HECTD4
bta-miR-2331-3p	NM_001109754	4059	4065	95	ENSG00000127329	PTPRB
bta-miR-760-3p	NM_001109938	76	83	95	ENSG00000224120	C6orf136
bta-miR-760-3p	NM_001109938	76	83	95	ENSG00000233164	C6orf136
bta-miR-760-3p	NM_001109938	76	83	95	ENSG00000204564	C6orf136
bta-miR-760-3p	NM_001109938	76	83	95	ENSG00000206487	C6orf136
bta-miR-760-3p	NM_001109938	76	83	95	ENSG00000237100	C6orf136
bta-miR-760-3p	NM_001109938	76	83	95	ENSG00000233641	C6orf136
bta-miR-760-3p	NM_001109938	76	83	95	ENSG00000237012	C6orf136
bta-miR-2331-3p	NM_001109977	598	605	97	ENSG00000164142	FAM160A1
bta-miR-874	NM_001110199	33	40	96	ENSG00000177679	SRRM3
bta-miR-24-3p	NM_001110213	2333	2340	99	ENSG00000272803	PRH2
bta-miR-24-3p	NM_001110213	2333	2340	99	ENSG00000275679	PRH2
bta-miR-24-3p	NM_001110213	2333	2340	99	ENSG00000134551	PRH2
bta-miR-6123	NM_001110215	79	86	95	ENSG00000100162	CENPM
bta-miR-24-3p	NM_001110356	465	472	96	ENSG00000188655	RNASE9
bta-miR-24-3p	NM_001110357	465	472	96	ENSG00000188655	RNASE9
bta-miR-24-3p	NM_001110358	465	472	96	ENSG00000188655	RNASE9
bta-miR-24-3p	NM_001110359	465	472	96	ENSG00000188655	RNASE9
bta-miR-24-3p	NM_001110360	465	472	96	ENSG00000188655	RNASE9
bta-miR-24-3p	NM_001110361	465	472	96	ENSG00000188655	RNASE9
bta-miR-149-5p	NM_001110533	272	279	97	ENSG00000162398	LEXM
bta-miR-24-3p	NM_001110781	197	204	96	ENSG00000189339	SLC35E2B
bta-miR-5-37953	NM_001111061	1548	1554	97	ENSG00000177551	NHLH2
bta-miR-19-17220	NM_001111101	162	169	99	ENSG00000119865	CNRIP1
bta-miR-18a	NM_001111101	219	225	95	ENSG00000119865	CNRIP1
bta-miR-6529a	NM_001111112	4071	4078	98	ENSG00000078140	UBE2K
bta-miR-6529a	NM_001111113	4071	4078	98	ENSG00000078140	UBE2K
bta-miR-1-612	NM_001111125	1281	1287	95	ENSG00000124313	IQSEC2
bta-miR-25-27602	NM_001111125	46	53	99	ENSG00000124313	IQSEC2
bta-miR-1-1319	NM_001111125	1281	1287	95	ENSG00000124313	IQSEC2
bta-miR-4-36127	NM_001111125	1281	1287	95	ENSG00000124313	IQSEC2
bta-miR-874	NM_001111270	57	64	99	ENSG00000240771	ARHGEF25
bta-miR-19-17220	NM_001111298	1239	1246	95	ENSG00000185250	PPIL6
bta-miR-5-37953	NM_001111322	1726	1733	99	ENSG00000123064	DDX54
bta-miR-5-37255	NM_001112704	620	627	98	ENSG00000148704	VAX1
bta-miR-27a-3p	NM_001112736	2765	2772	97	ENSG00000163946	FAM208A
bta-miR-2331-3p	NM_001113182	146	153	95	ENSG00000204256	BRD2
bta-miR-2331-3p	NM_001113182	146	153	95	ENSG00000235307	BRD2
bta-miR-2331-3p	NM_001113182	146	153	95	ENSG00000234704	BRD2
bta-miR-2331-3p	NM_001113182	146	153	95	ENSG00000230678	BRD2
bta-miR-2331-3p	NM_001113182	146	153	95	ENSG00000234507	BRD2
bta-miR-2331-3p	NM_001113182	146	153	95	ENSG00000215077	BRD2
bta-miR-2331-3p	NM_001113182	146	153	95	ENSG00000236227	BRD2
bta-miR-2448-3p	NM_001113226	310	317	95	ENSG00000162631	NTNG1
bta-miR-2448-3p	NM_001113228	310	317	95	ENSG00000162631	NTNG1
bta-miR-2387	NM_001113402	389	396	96	ENSG00000151743	AMN1
bta-miR-330	NM_001113402	91	98	99	ENSG00000151743	AMN1
bta-miR-330	NM_001113475	51	58	98	ENSG00000165555	NOXRED1
bta-miR-2323	NM_001113482	966	973	97	ENSG00000185090	MANEAL
bta-miR-19-17220	NM_001113491	118	125	98	ENSG00000184640	2009-09-01
bta-miR-19-17220	NM_001113492	118	125	98	ENSG00000184640	2009-09-01
bta-miR-19-17220	NM_001113493	118	125	98	ENSG00000184640	2009-09-01
bta-miR-19-17220	NM_001113494	118	125	98	ENSG00000184640	2009-09-01
bta-miR-19-17220	NM_001113495	118	125	98	ENSG00000184640	2009-09-01
bta-miR-19-17220	NM_001113496	118	125	98	ENSG00000184640	2009-09-01
bta-miR-11-5700	NM_001113513	212	219	97	ENSG00000102606	ARHGEF7
bta-miR-874	NM_001113525	194	201	97	ENSG00000158805	ZNF276
bta-miR-2403	NM_001113546	288	295	96	ENSG00000050405	LIMA1
bta-miR-2403	NM_001113547	288	295	96	ENSG00000050405	LIMA1
bta-miR-330	NM_001113561	74	81	99	ENSG00000164197	RNF180
bta-miR-6529a	NM_001113561	470	477	97	ENSG00000164197	RNF180
bta-miR-330	NM_001114	2192	2199	97	ENSG00000121281	ADCY7
bta-miR-3432a	NM_001114086	198	205	97	ENSG00000112782	CLIC5
bta-miR-330	NM_001114092	56	63	98	ENSG00000134077	THUMPD3
bta-miR-18a	NM_001114093	1942	1949	97	ENSG00000262860	LSM14A
bta-miR-18a	NM_001114093	1942	1949	97	ENSG00000257103	LSM14A
bta-miR-326	NM_001114123	1259	1266	99	ENSG00000126767	ELK1
bta-miR-760-3p	NM_001114133	1293	1300	96	ENSG00000166317	SYNPO2L
bta-miR-2346	NM_001114175	659	666	98	ENSG00000151834	GABRA2
bta-miR-2387	NM_001114185	440	447	96	ENSG00000110921	MVK
bta-miR-149-5p	NM_001114380	939	946	98	ENSG00000005844	ITGAL
bta-miR-874	NM_001114380	85	92	95	ENSG00000005844	ITGAL
bta-miR-2387	NM_001114380	518	525	97	ENSG00000005844	ITGAL
bta-miR-6123	NM_001114380	959	966	97	ENSG00000005844	ITGAL
bta-miR-760-3p	NM_001114380	937	944	95	ENSG00000005844	ITGAL
bta-miR-25-27602	NM_001114387	947	954	97	ENSG00000187054	TMPRSS11A
bta-miR-2448-3p	NM_001114387	127	134	99	ENSG00000187054	TMPRSS11A
bta-miR-27a-3p	NM_001114395	237	244	96	ENSG00000044459	CNTLN
bta-miR-378	NM_001114397	447	453	96	ENSG00000281763	DHX36
bta-miR-378	NM_001114397	447	453	96	ENSG00000174953	DHX36
bta-miR-149-5p	NM_001114632	78	85	95	ENSG00000243789	JMJD7
bta-miR-2323	NM_001114634	538	545	97	ENSG00000181690	PLAG1
bta-miR-2323	NM_001114635	538	545	97	ENSG00000181690	PLAG1
bta-miR-326	NM_001114974	27	34	97	ENSG00000188176	SMTNL2
bta-miR-149-5p	NM_001114978	3059	3066	98	ENSG00000073282	TP63
bta-miR-149-5p	NM_001114980	2773	2780	98	ENSG00000073282	TP63
bta-miR-149-5p	NM_001114981	3059	3066	98	ENSG00000073282	TP63
bta-miR-2346	NM_001115131	77	84	97	ENSG00000039537	C6
bta-miR-24-3p	NM_001122633	714	721	96	ENSG00000021826	CPS1
bta-miR-24-3p	NM_001122634	714	721	96	ENSG00000021826	CPS1
bta-miR-19-17220	NM_001122665	22	29	98	ENSG00000067048	DDX3Y
bta-miR-5-37953	NM_001122679	1268	1274	98	ENSG00000145934	TENM2
bta-miR-18a	NM_001122740	4217	4224	99	ENSG00000091831	ESR1
bta-miR-18a	NM_001122740	4180	4187	99	ENSG00000091831	ESR1
bta-miR-18a	NM_001122741	4180	4187	99	ENSG00000091831	ESR1
bta-miR-18a	NM_001122741	4217	4224	99	ENSG00000091831	ESR1
bta-miR-18a	NM_001122742	4180	4187	99	ENSG00000091831	ESR1
bta-miR-18a	NM_001122742	4217	4224	99	ENSG00000091831	ESR1
bta-miR-6123	NM_001122764	38	44	96	ENSG00000143224	PPOX
bta-miR-2331-3p	NM_001122834	1650	1657	99	ENSG00000280680	HHAT
bta-miR-2331-3p	NM_001122834	1650	1657	99	ENSG00000054392	HHAT
bta-miR-330	NM_001122837	123	130	96	ENSG00000169241	SLC50A1
bta-miR-330	NM_001122839	123	130	96	ENSG00000169241	SLC50A1
bta-miR-27a-3p	NM_001122842	310	317	97	ENSG00000111912	NCOA7
bta-miR-326	NM_001122847	372	379	96	ENSG00000111181	SLC6A12
bta-miR-326	NM_001122848	372	379	96	ENSG00000111181	SLC6A12
bta-miR-6529a	NM_001122853	235	242	95	ENSG00000164591	MYOZ3
bta-miR-149-5p	NM_001122962	812	819	96	ENSG00000196209	SIRPB2
bta-miR-2387	NM_001122965	188	195	95	ENSG00000215853	RPTN
bta-miR-760-3p	NM_001123066	188	195	96	ENSG00000276155	MAPT
bta-miR-760-3p	NM_001123066	188	195	96	ENSG00000186868	MAPT
bta-miR-760-3p	NM_001123066	188	195	96	ENSG00000277956	MAPT
bta-miR-760-3p	NM_001123067	188	195	96	ENSG00000276155	MAPT
bta-miR-760-3p	NM_001123067	188	195	96	ENSG00000186868	MAPT
bta-miR-760-3p	NM_001123067	188	195	96	ENSG00000277956	MAPT
bta-miR-2448-3p	NM_001123168	1000	1007	99	ENSG00000196550	FAM72A
bta-miR-5-37255	NM_001123329	32	39	99	ENSG00000126804	ZBTB1
bta-miR-19-17220	NM_001126	837	844	96	ENSG00000035687	ADSS
bta-miR-330	NM_001126107	823	830	97	ENSG00000070915	SLC12A3
bta-miR-330	NM_001126108	823	830	97	ENSG00000070915	SLC12A3
bta-miR-19-17220	NM_001126131	132	139	97	ENSG00000140521	POLG
bta-miR-2331-3p	NM_001126240	2098	2105	95	ENSG00000078900	TP73
bta-miR-2331-3p	NM_001126241	2417	2424	95	ENSG00000078900	TP73
bta-miR-2331-3p	NM_001126242	2434	2441	95	ENSG00000078900	TP73
bta-miR-2350	NM_001126336	1555	1562	96	ENSG00000038427	VCAN
bta-miR-874	NM_001126340	210	217	97	ENSG00000160991	ORAI2
bta-miR-2346	NM_001127182	88	95	97	ENSG00000138180	CEP55
bta-miR-326	NM_001127211	396	403	99	ENSG00000187164	SHTN1
bta-miR-378	NM_001127217	344	351	95	ENSG00000120693	SMAD9
bta-miR-18a	NM_001127219	137	144	98	ENSG00000110455	ACCS
bta-miR-27a-3p	NM_001127221	1448	1455	96	ENSG00000141837	CACNA1A
bta-miR-27a-3p	NM_001127222	823	830	96	ENSG00000141837	CACNA1A
bta-miR-2331-3p	NM_001127223	295	302	96	ENSG00000085063	CD59
bta-miR-2331-3p	NM_001127225	295	302	96	ENSG00000085063	CD59
bta-miR-2331-3p	NM_001127226	295	302	96	ENSG00000085063	CD59
bta-miR-2331-3p	NM_001127227	295	302	96	ENSG00000085063	CD59
bta-miR-361	NM_001127235	1686	1693	99	ENSG00000062194	GPBP1
bta-miR-361	NM_001127236	1686	1693	99	ENSG00000062194	GPBP1
bta-miR-2331-3p	NM_001127350	226	233	99	ENSG00000130772	MED18
bta-miR-2346	NM_001127357	118	125	96	ENSG00000006576	PHTF2
bta-miR-2346	NM_001127358	118	125	96	ENSG00000006576	PHTF2
bta-miR-1-612	NM_001127359	1215	1221	97	ENSG00000006576	PHTF2
bta-miR-1-1319	NM_001127359	1215	1221	97	ENSG00000006576	PHTF2
bta-miR-4-36127	NM_001127359	1215	1221	97	ENSG00000006576	PHTF2
bta-miR-1-612	NM_001127360	1215	1221	97	ENSG00000006576	PHTF2
bta-miR-1-1319	NM_001127360	1215	1221	97	ENSG00000006576	PHTF2
bta-miR-4-36127	NM_001127360	1215	1221	97	ENSG00000006576	PHTF2
bta-miR-2350	NM_001127366	302	309	98	ENSG00000135903	PAX3
bta-miR-5-37255	NM_001127366	118	125	97	ENSG00000135903	PAX3
bta-miR-25-27602	NM_001127370	1157	1164	97	ENSG00000164649	CDCA7L
bta-miR-6529a	NM_001127370	60	66	96	ENSG00000164649	CDCA7L
bta-miR-25-27602	NM_001127371	1157	1164	97	ENSG00000164649	CDCA7L
bta-miR-6529a	NM_001127371	60	66	96	ENSG00000164649	CDCA7L
bta-miR-11-5700	NM_001127385	551	557	97	ENSG00000205279	CTXN3
bta-miR-330	NM_001127453	591	598	96	ENSG00000105928	DFNA5
bta-miR-330	NM_001127454	591	598	96	ENSG00000105928	DFNA5
bta-miR-149-5p	NM_001127460	177	184	99	ENSG00000135473	PAN2
bta-miR-1-1319	NM_001127461	50	56	96	ENSG00000162711	NLRP3
bta-miR-4-36127	NM_001127461	50	56	96	ENSG00000162711	NLRP3
bta-miR-1-612	NM_001127461	50	56	96	ENSG00000162711	NLRP3
bta-miR-4-36127	NM_001127462	50	56	96	ENSG00000162711	NLRP3
bta-miR-1-1319	NM_001127462	50	56	96	ENSG00000162711	NLRP3
bta-miR-1-612	NM_001127462	50	56	96	ENSG00000162711	NLRP3
bta-miR-505	NM_001127482	1444	1451	96	ENSG00000123178	SPRYD7
bta-miR-18a	NM_001127643	2393	2400	96	ENSG00000022355	GABRA1
bta-miR-149-5p	NM_001127643	211	218	95	ENSG00000022355	GABRA1
bta-miR-149-5p	NM_001127644	211	218	95	ENSG00000022355	GABRA1
bta-miR-18a	NM_001127644	2393	2400	96	ENSG00000022355	GABRA1
bta-miR-18a	NM_001127645	2393	2400	96	ENSG00000022355	GABRA1
bta-miR-149-5p	NM_001127645	211	218	95	ENSG00000022355	GABRA1
bta-miR-149-5p	NM_001127648	211	218	95	ENSG00000022355	GABRA1
bta-miR-18a	NM_001127648	2393	2400	96	ENSG00000022355	GABRA1
bta-miR-6123	NM_001127671	6375	6381	96	ENSG00000113594	LIFR
bta-miR-874	NM_001127688	153	160	99	ENSG00000102409	BEX4
bta-miR-2346	NM_001127700	1628	1635	95	ENSG00000197249	SERPINA1
bta-miR-2346	NM_001127700	1628	1635	95	ENSG00000277377	SERPINA1
bta-miR-378	NM_001127700	1537	1544	97	ENSG00000197249	SERPINA1
bta-miR-378	NM_001127700	1537	1544	97	ENSG00000277377	SERPINA1
bta-miR-378	NM_001127701	1537	1544	97	ENSG00000197249	SERPINA1
bta-miR-378	NM_001127701	1537	1544	97	ENSG00000277377	SERPINA1
bta-miR-2346	NM_001127701	1628	1635	95	ENSG00000197249	SERPINA1
bta-miR-2346	NM_001127701	1628	1635	95	ENSG00000277377	SERPINA1
bta-miR-2346	NM_001127702	1628	1635	95	ENSG00000197249	SERPINA1
bta-miR-2346	NM_001127702	1628	1635	95	ENSG00000277377	SERPINA1
bta-miR-378	NM_001127702	1537	1544	97	ENSG00000197249	SERPINA1
bta-miR-378	NM_001127702	1537	1544	97	ENSG00000277377	SERPINA1
bta-miR-2346	NM_001127703	1628	1635	95	ENSG00000197249	SERPINA1
bta-miR-2346	NM_001127703	1628	1635	95	ENSG00000277377	SERPINA1
bta-miR-378	NM_001127703	1537	1544	97	ENSG00000197249	SERPINA1
bta-miR-378	NM_001127703	1537	1544	97	ENSG00000277377	SERPINA1
bta-miR-2346	NM_001127704	1628	1635	95	ENSG00000197249	SERPINA1
bta-miR-2346	NM_001127704	1628	1635	95	ENSG00000277377	SERPINA1
bta-miR-378	NM_001127704	1537	1544	97	ENSG00000197249	SERPINA1
bta-miR-378	NM_001127704	1537	1544	97	ENSG00000277377	SERPINA1
bta-miR-378	NM_001127705	1537	1544	97	ENSG00000197249	SERPINA1
bta-miR-378	NM_001127705	1537	1544	97	ENSG00000277377	SERPINA1
bta-miR-2346	NM_001127705	1628	1635	95	ENSG00000197249	SERPINA1
bta-miR-2346	NM_001127705	1628	1635	95	ENSG00000277377	SERPINA1
bta-miR-2346	NM_001127706	1628	1635	95	ENSG00000197249	SERPINA1
bta-miR-2346	NM_001127706	1628	1635	95	ENSG00000277377	SERPINA1
bta-miR-378	NM_001127706	1537	1544	97	ENSG00000197249	SERPINA1
bta-miR-378	NM_001127706	1537	1544	97	ENSG00000277377	SERPINA1
bta-miR-378	NM_001127707	1537	1544	97	ENSG00000197249	SERPINA1
bta-miR-378	NM_001127707	1537	1544	97	ENSG00000277377	SERPINA1
bta-miR-2346	NM_001127707	1628	1635	95	ENSG00000197249	SERPINA1
bta-miR-2346	NM_001127707	1628	1635	95	ENSG00000277377	SERPINA1
bta-miR-27a-3p	NM_001127889	226	233	98	ENSG00000090487	SPG21
bta-miR-27a-3p	NM_001127890	226	233	98	ENSG00000090487	SPG21
bta-miR-6529a	NM_001127892	428	435	98	ENSG00000103449	SALL1
bta-miR-27a-3p	NM_001127897	456	463	96	ENSG00000103494	RPGRIP1L
bta-miR-11-5700	NM_001128	3954	3960	95	ENSG00000166747	AP1G1
bta-miR-2323	NM_001128127	2609	2616	99	ENSG00000198814	GK
bta-miR-18a	NM_001128164	6760	6767	97	ENSG00000124788	ATXN1
bta-miR-149-5p	NM_001128165	550	557	98	ENSG00000144152	FBLN7
bta-miR-149-5p	NM_001128176	5547	5554	99	ENSG00000151090	THRB
bta-miR-149-5p	NM_001128177	5547	5554	99	ENSG00000151090	THRB
bta-miR-361	NM_001128178	97	104	98	ENSG00000144061	NPHP1
bta-miR-361	NM_001128178	312	319	98	ENSG00000144061	NPHP1
bta-miR-361	NM_001128179	312	319	98	ENSG00000144061	NPHP1
bta-miR-361	NM_001128179	97	104	98	ENSG00000144061	NPHP1
bta-miR-5-37953	NM_001128204	2259	2265	95	ENSG00000137573	SULF1
bta-miR-5-37953	NM_001128205	2259	2265	95	ENSG00000137573	SULF1
bta-miR-5-37953	NM_001128206	2259	2265	95	ENSG00000137573	SULF1
bta-miR-330	NM_001128217	1258	1265	95	ENSG00000164985	PSIP1
bta-miR-221	NM_001128224	238	245	96	ENSG00000172765	TMCC1
bta-miR-222	NM_001128224	238	245	95	ENSG00000172765	TMCC1
bta-miR-24-3p	NM_001128227	1945	1952	99	ENSG00000159921	GNE
bta-miR-2350	NM_001128227	223	230	97	ENSG00000159921	GNE
bta-miR-27a-3p	NM_001128426	350	357	97	ENSG00000138660	AP1AR
bta-miR-874	NM_001128427	197	204	99	ENSG00000168843	FSTL5
bta-miR-874	NM_001128428	197	204	99	ENSG00000168843	FSTL5
bta-miR-2350	NM_001128602	120	127	99	ENSG00000172575	RASGRP1
bta-miR-2331-3p	NM_001128608	350	357	95	ENSG00000137802	MAPKBP1
bta-miR-27a-3p	NM_001128617	15	22	97	ENSG00000135597	REPS1
bta-miR-2323	NM_001128618	426	433	96	ENSG00000204669	C9orf57
bta-miR-505	NM_001128618	838	845	99	ENSG00000204669	C9orf57
bta-miR-24-3p	NM_001128618	50	57	95	ENSG00000204669	C9orf57
bta-miR-2346	NM_001128619	429	436	99	ENSG00000267697	LUZP6
bta-miR-2350	NM_001128620	886	893	97	ENSG00000149269	PAK1
bta-miR-760-3p	NM_001128839	866	873	99	ENSG00000157388	CACNA1D
bta-miR-760-3p	NM_001128840	866	873	99	ENSG00000157388	CACNA1D
bta-miR-2331-3p	NM_001128922	1215	1222	96	ENSG00000137507	LRRC32
bta-miR-27a-3p	NM_001128925	644	651	97	ENSG00000108242	CYP2C18
bta-miR-2331-3p	NM_001128925	566	573	96	ENSG00000108242	CYP2C18
bta-miR-760-3p	NM_001128929	3368	3375	95	ENSG00000185008	ROBO2
bta-miR-326	NM_001128933	65	72	99	ENSG00000172403	SYNPO2
bta-miR-5-37255	NM_001128934	239	246	97	ENSG00000172403	SYNPO2
bta-miR-378	NM_001129727	562	569	96	ENSG00000196155	PLEKHG4
bta-miR-378	NM_001129728	562	569	96	ENSG00000196155	PLEKHG4
bta-miR-378	NM_001129729	562	569	96	ENSG00000196155	PLEKHG4
bta-miR-378	NM_001129731	562	569	96	ENSG00000196155	PLEKHG4
bta-miR-361	NM_001129889	256	263	99	ENSG00000080166	DCT
bta-miR-1249	NM_001129896	62	69	99	ENSG00000102362	SYTL4
bta-miR-874	NM_001129896	33	40	98	ENSG00000102362	SYTL4
bta-miR-2346	NM_001129898	459	466	98	ENSG00000147121	KRBOX4
bta-miR-2346	NM_001129898	208	215	97	ENSG00000147121	KRBOX4
bta-miR-2346	NM_001129899	721	728	98	ENSG00000147121	KRBOX4
bta-miR-2346	NM_001129900	721	728	98	ENSG00000147121	KRBOX4
bta-miR-25-27602	NM_001129994	2677	2684	97	ENSG00000153885	KCTD15
bta-miR-25-27602	NM_001129994	2651	2658	97	ENSG00000153885	KCTD15
bta-miR-2403	NM_001129994	2755	2762	97	ENSG00000153885	KCTD15
bta-miR-25-27602	NM_001129995	2677	2684	97	ENSG00000153885	KCTD15
bta-miR-2403	NM_001129995	2755	2762	97	ENSG00000153885	KCTD15
bta-miR-25-27602	NM_001129995	2651	2658	97	ENSG00000153885	KCTD15
bta-miR-6529a	NM_001130	794	801	97	ENSG00000104964	AES
bta-miR-6123	NM_001130001	144	151	99	ENSG00000174899	PQLC2L
bta-miR-2331-3p	NM_001130001	548	555	97	ENSG00000174899	PQLC2L
bta-miR-6123	NM_001130002	144	151	99	ENSG00000174899	PQLC2L
bta-miR-2331-3p	NM_001130002	548	555	97	ENSG00000174899	PQLC2L
bta-miR-25-27602	NM_001130003	55	62	99	ENSG00000163630	SYNPR
bta-miR-378	NM_001130004	626	633	98	ENSG00000072110	ACTN1
bta-miR-378	NM_001130005	626	633	98	ENSG00000072110	ACTN1
bta-miR-326	NM_001130012	198	205	95	ENSG00000065054	SLC9A3R2
bta-miR-6529a	NM_001130012	345	352	96	ENSG00000065054	SLC9A3R2
bta-miR-19-17220	NM_001130020	1390	1397	99	ENSG00000033627	ATP6V0A1
bta-miR-19-17220	NM_001130021	1390	1397	99	ENSG00000033627	ATP6V0A1
bta-miR-2323	NM_001130025	104	111	96	ENSG00000170379	TCAF2
bta-miR-326	NM_001130026	232	239	95	ENSG00000170379	TCAF2
bta-miR-24-27575	NM_001130028	19	26	96	ENSG00000179335	CLK3
bta-miR-18a	NM_001130029	308	315	96	ENSG00000164620	RELL2
bta-miR-6123	NM_001130037	963	970	99	ENSG00000110675	ELMOD1
bta-miR-326	NM_001130040	1161	1168	97	ENSG00000160691	SHC1
bta-miR-326	NM_001130041	1161	1168	97	ENSG00000160691	SHC1
bta-miR-2331-3p	NM_001130058	378	385	98	ENSG00000137968	SLC44A5
bta-miR-11-5700	NM_001130064	409	416	99	ENSG00000172020	GAP43
bta-miR-1-1319	NM_001130064	437	443	95	ENSG00000172020	GAP43
bta-miR-1-612	NM_001130064	437	443	95	ENSG00000172020	GAP43
bta-miR-4-36127	NM_001130064	437	443	95	ENSG00000172020	GAP43
bta-miR-326	NM_001130069	501	508	97	ENSG00000129103	SUMF2
bta-miR-1-1319	NM_001130081	356	363	97	ENSG00000075651	PLD1
bta-miR-4-36127	NM_001130081	356	363	97	ENSG00000075651	PLD1
bta-miR-1-612	NM_001130081	356	363	97	ENSG00000075651	PLD1
bta-miR-25-27602	NM_001130082	575	582	96	ENSG00000164050	PLXNB1
bta-miR-149-5p	NM_001130101	72	79	97	ENSG00000025434	NR1H3
bta-miR-149-5p	NM_001130102	72	79	97	ENSG00000025434	NR1H3
bta-miR-1-1319	NM_001130136	108	115	96	ENSG00000167178	ISLR2
bta-miR-4-36127	NM_001130136	108	115	96	ENSG00000167178	ISLR2
bta-miR-1-612	NM_001130136	108	115	96	ENSG00000167178	ISLR2
bta-miR-1-1319	NM_001130137	108	115	96	ENSG00000167178	ISLR2
bta-miR-1-612	NM_001130137	108	115	96	ENSG00000167178	ISLR2
bta-miR-4-36127	NM_001130137	108	115	96	ENSG00000167178	ISLR2
bta-miR-4-36127	NM_001130138	108	115	96	ENSG00000167178	ISLR2
bta-miR-1-1319	NM_001130138	108	115	96	ENSG00000167178	ISLR2
bta-miR-1-612	NM_001130138	108	115	96	ENSG00000167178	ISLR2
bta-miR-326	NM_001130417	44	51	95	ENSG00000100678	SLC8A3
bta-miR-505	NM_001130417	1642	1649	97	ENSG00000100678	SLC8A3
bta-miR-2387	NM_001130420	1733	1740	97	ENSG00000139613	SMARCC2
bta-miR-326	NM_001130448	55	62	98	ENSG00000188277	C15orf62
bta-miR-2350	NM_001130528	161	168	96	ENSG00000008294	SPAG9
bta-miR-4-36127	NM_001130683	6063	6070	99	ENSG00000164116	GUCY1A3
bta-miR-1-1319	NM_001130683	6063	6070	99	ENSG00000164116	GUCY1A3
bta-miR-1-612	NM_001130683	6063	6070	99	ENSG00000164116	GUCY1A3
bta-miR-330	NM_001130710	120	127	99	ENSG00000106355	LSM5
bta-miR-330	NM_001130710	422	429	97	ENSG00000106355	LSM5
bta-miR-2331-3p	NM_001130721	1963	1970	98	ENSG00000170522	ELOVL6
bta-miR-27a-3p	NM_001130726	145	152	96	ENSG00000181982	CCDC149
bta-miR-326	NM_001130726	2053	2060	97	ENSG00000181982	CCDC149
bta-miR-2346	NM_001130726	59	66	95	ENSG00000181982	CCDC149
bta-miR-760-3p	NM_001130858	91	98	95	ENSG00000168781	PPIP5K1
bta-miR-19-17220	NM_001130858	222	229	97	ENSG00000168781	PPIP5K1
bta-miR-760-3p	NM_001130859	91	98	95	ENSG00000168781	PPIP5K1
bta-miR-19-17220	NM_001130859	222	229	97	ENSG00000168781	PPIP5K1
bta-miR-2331-3p	NM_001130864	289	296	99	ENSG00000170234	PWWP2A
bta-miR-330	NM_001130864	928	935	99	ENSG00000170234	PWWP2A
bta-miR-5-37953	NM_001130924	1483	1489	96	ENSG00000188807	TMEM201
bta-miR-2403	NM_001130924	1527	1534	95	ENSG00000188807	TMEM201
bta-miR-27a-3p	NM_001130960	954	961	97	ENSG00000114805	PLCH1
bta-miR-27a-3p	NM_001130961	3040	3047	97	ENSG00000114805	PLCH1
bta-miR-2350	NM_001130996	486	493	99	ENSG00000113161	HMGCR
bta-miR-6123	NM_001130997	39	46	95	ENSG00000262919	FAM58A
bta-miR-4-36127	NM_001131	618	624	95	ENSG00000124812	CRISP1
bta-miR-874	NM_001131	525	532	96	ENSG00000124812	CRISP1
bta-miR-1-1319	NM_001131	618	624	95	ENSG00000124812	CRISP1
bta-miR-1-612	NM_001131	618	624	95	ENSG00000124812	CRISP1
bta-miR-874	NM_001131008	356	363	98	ENSG00000127947	PTPN12
bta-miR-19-17220	NM_001131008	781	787	95	ENSG00000127947	PTPN12
bta-miR-874	NM_001131009	356	363	98	ENSG00000127947	PTPN12
bta-miR-19-17220	NM_001131009	781	787	95	ENSG00000127947	PTPN12
bta-miR-6123	NM_001131010	170	177	98	ENSG00000182568	SATB1
bta-miR-361	NM_001131027	1289	1296	99	ENSG00000131435	PDLIM4
bta-miR-19-17220	NM_001131027	1242	1249	98	ENSG00000131435	PDLIM4
bta-miR-19-17220	NM_001131062	4553	4560	99	ENSG00000164576	SAP30L
bta-miR-19-17220	NM_001131063	4553	4560	99	ENSG00000164576	SAP30L
bta-miR-2323	NM_001131065	666	673	97	ENSG00000175449	RFESD
bta-miR-5-37255	NM_001131065	697	704	97	ENSG00000175449	RFESD
bta-miR-5-37255	NM_001131066	697	704	97	ENSG00000175449	RFESD
bta-miR-2323	NM_001131066	666	673	97	ENSG00000175449	RFESD
bta-miR-11-5700	NM_001134223	503	510	99	ENSG00000109189	USP46
bta-miR-11-5700	NM_001134223	24	30	96	ENSG00000109189	USP46
bta-miR-6123	NM_001134224	2744	2751	95	ENSG00000040933	INPP4A
bta-miR-6123	NM_001134225	2744	2751	95	ENSG00000040933	INPP4A
bta-miR-7-42699	NM_001134285	208	215	98	ENSG00000196482	ESRRG
bta-miR-2323	NM_001134335	1783	1790	95	ENSG00000086232	EIF2AK1
bta-miR-6123	NM_001134363	378	385	96	ENSG00000203867	RBM20
bta-miR-2403	NM_001134363	2477	2484	95	ENSG00000203867	RBM20
bta-miR-6529a	NM_001134369	1149	1156	99	ENSG00000093167	LRRFIP2
bta-miR-27a-3p	NM_001134375	2578	2585	96	ENSG00000107443	CCNJ
bta-miR-27a-3p	NM_001134376	2578	2585	96	ENSG00000107443	CCNJ
bta-miR-1-612	NM_001134405	1967	1973	95	ENSG00000105784	RUNDC3B
bta-miR-4-36127	NM_001134405	1967	1973	95	ENSG00000105784	RUNDC3B
bta-miR-1-1319	NM_001134405	1967	1973	95	ENSG00000105784	RUNDC3B
bta-miR-1-612	NM_001134406	1967	1973	95	ENSG00000105784	RUNDC3B
bta-miR-1-1319	NM_001134406	1967	1973	95	ENSG00000105784	RUNDC3B
bta-miR-4-36127	NM_001134406	1967	1973	95	ENSG00000105784	RUNDC3B
bta-miR-378	NM_001134418	661	668	95	ENSG00000090530	P3H2
bta-miR-760-3p	NM_001134418	73	80	98	ENSG00000090530	P3H2
bta-miR-326	NM_001134440	1179	1186	98	ENSG00000281448	ZNF502
bta-miR-326	NM_001134440	1179	1186	98	ENSG00000196653	ZNF502
bta-miR-326	NM_001134441	1179	1186	98	ENSG00000281448	ZNF502
bta-miR-326	NM_001134441	1179	1186	98	ENSG00000196653	ZNF502
bta-miR-326	NM_001134442	1179	1186	98	ENSG00000281448	ZNF502
bta-miR-326	NM_001134442	1179	1186	98	ENSG00000196653	ZNF502
bta-miR-378	NM_001134445	2824	2831	98	ENSG00000153904	DDAH1
bta-miR-1249	NM_001134470	2118	2125	96	ENSG00000181744	C3orf58
bta-miR-5-37953	NM_001134492	444	450	96	ENSG00000153936	HS2ST1
bta-miR-5-37953	NM_001134671	179	185	98	ENSG00000136986	DERL1
bta-miR-361	NM_001134734	341	348	99	ENSG00000142698	C1orf94
bta-miR-149-5p	NM_001134742	3690	3697	99	ENSG00000080493	SLC4A4
bta-miR-874	NM_001134771	2225	2232	97	ENSG00000124140	SLC12A5
bta-miR-330	NM_001134832	163	170	99	ENSG00000135541	AHI1
bta-miR-149-5p	NM_001134836	812	819	96	ENSG00000196209	SIRPB2
bta-miR-24-3p	NM_001134851	1667	1674	97	ENSG00000081059	TCF7
bta-miR-5-37255	NM_001134851	94	101	98	ENSG00000081059	TCF7
bta-miR-19-17220	NM_001134870	482	489	95	ENSG00000231247	PPP1R18
bta-miR-19-17220	NM_001134870	482	489	95	ENSG00000229998	PPP1R18
bta-miR-19-17220	NM_001134870	482	489	95	ENSG00000225060	PPP1R18
bta-miR-19-17220	NM_001134870	482	489	95	ENSG00000230341	PPP1R18
bta-miR-19-17220	NM_001134870	482	489	95	ENSG00000146112	PPP1R18
bta-miR-19-17220	NM_001134870	482	489	95	ENSG00000234000	PPP1R18
bta-miR-19-17220	NM_001134870	482	489	95	ENSG00000206485	PPP1R18
bta-miR-24-3p	NM_001134878	476	483	97	ENSG00000088727	KIF9
bta-miR-2331-3p	NM_001134878	214	221	99	ENSG00000088727	KIF9
bta-miR-11-5700	NM_001134937	139	145	95	ENSG00000145216	FIP1L1
bta-miR-11-5700	NM_001134938	139	145	95	ENSG00000145216	FIP1L1
bta-miR-2350	NM_001135004	1035	1042	97	ENSG00000137094	DNAJB5
bta-miR-2350	NM_001135005	1035	1042	97	ENSG00000137094	DNAJB5
bta-miR-874	NM_001135021	167	174	99	ENSG00000115459	ELMOD3
bta-miR-874	NM_001135022	167	174	99	ENSG00000115459	ELMOD3
bta-miR-874	NM_001135023	167	174	99	ENSG00000115459	ELMOD3
bta-miR-19-17220	NM_001135024	799	806	99	ENSG00000110435	PDHX
bta-miR-27a-3p	NM_001135044	1219	1225	95	ENSG00000050748	MAPK9
bta-miR-149-5p	NM_001135047	2638	2645	96	ENSG00000140044	JDP2
bta-miR-149-5p	NM_001135048	2638	2645	96	ENSG00000140044	JDP2
bta-miR-149-5p	NM_001135049	2638	2645	96	ENSG00000140044	JDP2
bta-miR-326	NM_001135052	178	185	96	ENSG00000165025	SYK
bta-miR-326	NM_001135055	205	212	95	ENSG00000163931	TKT
bta-miR-24-3p	NM_001135055	679	686	95	ENSG00000163931	TKT
bta-miR-326	NM_001135055	624	631	98	ENSG00000163931	TKT
bta-miR-326	NM_001135098	1143	1150	99	ENSG00000007001	UPP2
bta-miR-760-3p	NM_001135111	639	646	96	ENSG00000124780	KCNK17
bta-miR-2387	NM_001135175	354	361	99	ENSG00000139350	NEDD1
bta-miR-2387	NM_001135176	354	361	99	ENSG00000139350	NEDD1
bta-miR-2387	NM_001135177	354	361	99	ENSG00000139350	NEDD1
bta-miR-18a	NM_001135187	5624	5631	97	ENSG00000173744	AGFG1
bta-miR-18a	NM_001135188	5624	5631	97	ENSG00000173744	AGFG1
bta-miR-18a	NM_001135189	5624	5631	97	ENSG00000173744	AGFG1
bta-miR-326	NM_001135241	50	57	99	ENSG00000151632	AKR1C2
bta-miR-874	NM_001135255	3490	3497	95	ENSG00000162521	RBBP4
bta-miR-222	NM_001135255	4142	4149	95	ENSG00000162521	RBBP4
bta-miR-24-3p	NM_001135255	357	364	95	ENSG00000162521	RBBP4
bta-miR-24-3p	NM_001135256	357	364	95	ENSG00000162521	RBBP4
bta-miR-874	NM_001135256	3490	3497	95	ENSG00000162521	RBBP4
bta-miR-222	NM_001135256	4142	4149	95	ENSG00000162521	RBBP4
bta-miR-361	NM_001135575	269	276	98	ENSG00000224531	SMIM13
bta-miR-2448-3p	NM_001135575	156	163	99	ENSG00000224531	SMIM13
bta-miR-149-5p	NM_001135590	33	40	99	ENSG00000283617
bta-miR-760-3p	NM_001135608	261	268	97	ENSG00000145819	ARHGAP26
bta-miR-505	NM_001135629	199	206	97	ENSG00000162869	PPP1R21
bta-miR-2403	NM_001135639	377	384	97	ENSG00000070729	CNGB1
bta-miR-11-5700	NM_001135648	1421	1427	96	ENSG00000273993	PTPRK
bta-miR-11-5700	NM_001135648	1421	1427	96	ENSG00000152894	PTPRK
bta-miR-6529a	NM_001135648	472	479	97	ENSG00000273993	PTPRK
bta-miR-6529a	NM_001135648	472	479	97	ENSG00000152894	PTPRK
bta-miR-361	NM_001135651	23	30	98	ENSG00000055332	EIF2AK2
bta-miR-361	NM_001135652	23	30	98	ENSG00000055332	EIF2AK2
bta-miR-378	NM_001135690	119	126	99	ENSG00000181195	PENK
bta-miR-221	NM_001135726	1329	1336	97	ENSG00000147421	HMBOX1
bta-miR-222	NM_001135726	1329	1336	96	ENSG00000147421	HMBOX1
bta-miR-18a	NM_001135726	44	51	98	ENSG00000147421	HMBOX1
bta-miR-24-27575	NM_001135768	1146	1153	96	ENSG00000073008	PVR
bta-miR-24-27575	NM_001135769	1146	1153	96	ENSG00000073008	PVR
bta-miR-25-27602	NM_001135825	312	319	98	ENSG00000138942	RNF185
bta-miR-27a-3p	NM_001135825	2272	2278	95	ENSG00000138942	RNF185
bta-miR-24-27575	NM_001135825	588	595	95	ENSG00000138942	RNF185
bta-miR-6123	NM_001136000	7050	7057	96	ENSG00000143322	ABL2
bta-miR-25-27602	NM_001136007	241	248	96	ENSG00000089356	FXYD3
bta-miR-2350	NM_001136008	221	228	99	ENSG00000089356	FXYD3
bta-miR-874	NM_001136008	47	54	98	ENSG00000089356	FXYD3
bta-miR-874	NM_001136008	232	239	99	ENSG00000089356	FXYD3
bta-miR-25-27602	NM_001136011	241	248	96	ENSG00000089356	FXYD3
bta-miR-25-27602	NM_001136012	241	248	96	ENSG00000089356	FXYD3
bta-miR-149-5p	NM_001136032	83	90	98	ENSG00000167757	KLK11
bta-miR-27a-3p	NM_001136044	448	455	99	ENSG00000164897	TMUB1
bta-miR-2448-3p	NM_001136109	20	26	95	ENSG00000137757	CASP5
bta-miR-2448-3p	NM_001136110	20	26	95	ENSG00000137757	CASP5
bta-miR-2448-3p	NM_001136112	20	26	95	ENSG00000137757	CASP5
bta-miR-19-17220	NM_001136113	471	478	95	ENSG00000130714	POMT1
bta-miR-19-17220	NM_001136114	471	478	95	ENSG00000130714	POMT1
bta-miR-2346	NM_001136116	140	147	98	ENSG00000234284	ZNF879
bta-miR-330	NM_001136140	41	48	98	ENSG00000162368	CMPK1
bta-miR-27a-3p	NM_001136200	342	349	98	ENSG00000166275	BORCS7
bta-miR-149-5p	NM_001136214	373	380	99	ENSG00000157322	CLEC18A
bta-miR-27a-3p	NM_001136223	2280	2287	95	ENSG00000117625	RCOR3
bta-miR-27a-3p	NM_001136224	2388	2395	95	ENSG00000117625	RCOR3
bta-miR-18a	NM_001136230	28	35	99	ENSG00000170509	HSD17B13
bta-miR-6529a	NM_001136230	1107	1114	99	ENSG00000170509	HSD17B13
bta-miR-25-27602	NM_001136264	1445	1451	95	ENSG00000183283	DAZAP2
bta-miR-6529a	NM_001136264	1345	1351	95	ENSG00000183283	DAZAP2
bta-miR-19-17220	NM_001136265	3681	3688	95	ENSG00000169991	IFFO2
bta-miR-6529a	NM_001136266	1151	1157	95	ENSG00000183283	DAZAP2
bta-miR-25-27602	NM_001136266	1251	1257	95	ENSG00000183283	DAZAP2
bta-miR-25-27602	NM_001136267	1445	1451	95	ENSG00000183283	DAZAP2
bta-miR-6529a	NM_001136267	1345	1351	95	ENSG00000183283	DAZAP2
bta-miR-6529a	NM_001136268	1345	1351	95	ENSG00000183283	DAZAP2
bta-miR-25-27602	NM_001136268	1445	1451	95	ENSG00000183283	DAZAP2
bta-miR-330	NM_001136474	291	298	95	ENSG00000143494	VASH2
bta-miR-6529a	NM_001136474	2751	2757	95	ENSG00000143494	VASH2
bta-miR-6529a	NM_001136475	2751	2757	95	ENSG00000143494	VASH2
bta-miR-330	NM_001136475	291	298	95	ENSG00000143494	VASH2
bta-miR-1-1319	NM_001136497	369	376	95	ENSG00000134717	BTF3L4
bta-miR-4-36127	NM_001136497	369	376	95	ENSG00000134717	BTF3L4
bta-miR-1-612	NM_001136497	369	376	95	ENSG00000134717	BTF3L4
bta-miR-326	NM_001136498	283	290	95	ENSG00000274768	CISD3
bta-miR-326	NM_001136498	283	290	95	ENSG00000277972	CISD3
bta-miR-2323	NM_001136543	638	645	95	ENSG00000163155	LYSMD1
bta-miR-24-3p	NM_001136554	2347	2354	95	ENSG00000198586	TLK1
bta-miR-24-3p	NM_001136555	2347	2354	95	ENSG00000198586	TLK1
bta-miR-5-37255	NM_001137550	1152	1159	98	ENSG00000124831	LRRFIP1
bta-miR-18a	NM_001137552	517	524	95	ENSG00000124831	LRRFIP1
bta-miR-18a	NM_001137553	517	524	95	ENSG00000124831	LRRFIP1
bta-miR-27a-3p	NM_001137601	1907	1914	98	ENSG00000179627	ZBTB42
bta-miR-2448-3p	NM_001137604	111	118	96	ENSG00000125630	POLR1B
bta-miR-361	NM_001137610	58	65	98	ENSG00000145002	FAM86B2
bta-miR-25-27602	NM_001137667	77	84	99	ENSG00000118412	CASP8AP2
bta-miR-25-27602	NM_001137668	77	84	99	ENSG00000118412	CASP8AP2
bta-miR-6123	NM_001139456	271	278	99	ENSG00000157703	SVOPL
bta-miR-11-5700	NM_001139466	2339	2346	97	ENSG00000101849	TBL1X
bta-miR-11-5700	NM_001139467	2339	2346	97	ENSG00000101849	TBL1X
bta-miR-11-5700	NM_001139468	2339	2346	97	ENSG00000101849	TBL1X
bta-miR-2448-3p	NM_001139498	569	576	96	ENSG00000129682	FGF13
bta-miR-330	NM_001139499	422	429	97	ENSG00000106355	LSM5
bta-miR-330	NM_001139499	120	127	99	ENSG00000106355	LSM5
bta-miR-2448-3p	NM_001139500	569	576	96	ENSG00000129682	FGF13
bta-miR-2448-3p	NM_001139501	569	576	96	ENSG00000283147
bta-miR-2448-3p	NM_001139502	569	576	96	ENSG00000283147
bta-miR-326	NM_001141	51	58	98	ENSG00000179593	ALOX15B
bta-miR-326	NM_001141	171	178	98	ENSG00000179593	ALOX15B
bta-miR-27a-3p	NM_001141945	36	43	95	ENSG00000107796	ACTA2
bta-miR-6123	NM_001141972	138	145	97	ENSG00000134146	DPH6
bta-miR-874	NM_001142302	3372	3379	98	ENSG00000103021	CCDC113
bta-miR-221	NM_001142314	2087	2094	95	ENSG00000162999	DUSP19
bta-miR-326	NM_001142317	104	111	99	ENSG00000140830	TXNL4B
bta-miR-326	NM_001142318	104	111	99	ENSG00000140830	TXNL4B
bta-miR-760-3p	NM_001142348	2888	2895	95	ENSG00000177098	SCN4B
bta-miR-760-3p	NM_001142349	2888	2895	95	ENSG00000177098	SCN4B
bta-miR-2387	NM_001142368	45	52	97	ENSG00000213366	GSTM2
bta-miR-11-5700	NM_001142386	9504	9511	98	ENSG00000067992	PDK3
bta-miR-18a	NM_001142393	335	342	95	ENSG00000111859	NEDD9
bta-miR-149-5p	NM_001142397	54	61	96	ENSG00000282825	CTIF
bta-miR-149-5p	NM_001142397	54	61	96	ENSG00000134030	CTIF
bta-miR-18a	NM_001142401	595	602	97	ENSG00000135535	CD164
bta-miR-18a	NM_001142402	595	602	97	ENSG00000135535	CD164
bta-miR-18a	NM_001142403	51	58	99	ENSG00000135535	CD164
bta-miR-18a	NM_001142404	51	58	99	ENSG00000135535	CD164
bta-miR-2323	NM_001142413	3777	3784	95	ENSG00000186354	C9orf47
bta-miR-505	NM_001142447	3003	3010	96	ENSG00000101892	ATP1B4
bta-miR-361	NM_001142447	289	296	95	ENSG00000101892	ATP1B4
bta-miR-27a-3p	NM_001142495	5452	5459	96	ENSG00000197535	MYO5A
bta-miR-378	NM_001142541	404	411	99	ENSG00000124786	SLC35B3
bta-miR-222	NM_001142550	1115	1122	97	ENSG00000085433	WDR47
bta-miR-221	NM_001142550	1115	1122	98	ENSG00000085433	WDR47
bta-miR-222	NM_001142551	1115	1122	97	ENSG00000085433	WDR47
bta-miR-221	NM_001142551	1115	1122	98	ENSG00000085433	WDR47
bta-miR-874	NM_001142564	131	138	99	ENSG00000198515	CNGA1
bta-miR-6123	NM_001142568	5240	5247	97	ENSG00000114439	BBX
bta-miR-27a-3p	NM_001142568	5690	5696	95	ENSG00000114439	BBX
bta-miR-149-5p	NM_001142571	254	261	95	ENSG00000185379	RAD51D
bta-miR-2346	NM_001142577	133	140	97	ENSG00000280568	ZNF780A
bta-miR-2346	NM_001142577	133	140	97	ENSG00000197782	ZNF780A
bta-miR-2346	NM_001142577	637	644	99	ENSG00000280568	ZNF780A
bta-miR-2346	NM_001142577	637	644	99	ENSG00000197782	ZNF780A
bta-miR-2346	NM_001142578	637	644	99	ENSG00000280568	ZNF780A
bta-miR-2346	NM_001142578	637	644	99	ENSG00000197782	ZNF780A
bta-miR-2346	NM_001142578	133	140	97	ENSG00000280568	ZNF780A
bta-miR-2346	NM_001142578	133	140	97	ENSG00000197782	ZNF780A
bta-miR-326	NM_001142593	16	23	95	ENSG00000274958	ITPK1
bta-miR-326	NM_001142593	16	23	95	ENSG00000100605	ITPK1
bta-miR-5-37953	NM_001142593	269	276	97	ENSG00000274958	ITPK1
bta-miR-5-37953	NM_001142593	269	276	97	ENSG00000100605	ITPK1
bta-miR-326	NM_001142605	212	219	98	ENSG00000108883	EFTUD2
bta-miR-2387	NM_001142620	125	132	96	ENSG00000137868	STRA6
bta-miR-19-17220	NM_001142623	789	796	99	ENSG00000167925	GHDC
bta-miR-2448-3p	NM_001142641	1215	1222	98	ENSG00000112787	FBRSL1
bta-miR-24-27575	NM_001142648	2003	2010	98	ENSG00000079332	SAR1A
bta-miR-24-3p	NM_001142649	443	450	97	ENSG00000171714	ANO5
bta-miR-330	NM_001142650	102	109	99	ENSG00000143889	HNRNPLL
bta-miR-361	NM_001142749	3461	3468	99	ENSG00000164659	KIAA1324L
bta-miR-149-5p	NM_001142771	3115	3122	97	ENSG00000150275	PCDH15
bta-miR-149-5p	NM_001142772	3115	3122	97	ENSG00000150275	PCDH15
bta-miR-24-3p	NM_001142776	521	528	96	ENSG00000128965	CHAC1
bta-miR-2331-3p	NM_001142797	267	274	98	ENSG00000186810	CXCR3
bta-miR-2387	NM_001142799	57	64	96	ENSG00000258315	C17orf49
bta-miR-25-27602	NM_001142801	75	82	98	ENSG00000188107	EYS
bta-miR-19-17220	NM_001142801	66	73	98	ENSG00000188107	EYS
bta-miR-5-37255	NM_001142801	77	84	96	ENSG00000188107	EYS
bta-miR-1-612	NM_001142854	219	225	96	ENSG00000274679	SPATC1L
bta-miR-1-612	NM_001142854	219	225	96	ENSG00000160284	SPATC1L
bta-miR-4-36127	NM_001142854	219	225	96	ENSG00000274679	SPATC1L
bta-miR-4-36127	NM_001142854	219	225	96	ENSG00000160284	SPATC1L
bta-miR-1-1319	NM_001142854	219	225	96	ENSG00000274679	SPATC1L
bta-miR-1-1319	NM_001142854	219	225	96	ENSG00000160284	SPATC1L
bta-miR-5-37953	NM_001142883	402	409	97	ENSG00000161896	IP6K3
bta-miR-6123	NM_001142885	491	498	96	ENSG00000128872	TMOD2
bta-miR-2350	NM_001142936	144	151	95	ENSG00000164535	DAGLB
bta-miR-1-1319	NM_001143757	727	734	98	ENSG00000148814	LRRC27
bta-miR-4-36127	NM_001143757	727	734	98	ENSG00000148814	LRRC27
bta-miR-1-612	NM_001143757	727	734	98	ENSG00000148814	LRRC27
bta-miR-24-3p	NM_001143780	59	66	95	ENSG00000013306	SLC25A39
bta-miR-2387	NM_001143818	397	404	97	ENSG00000197632	SERPINB2
bta-miR-5-37255	NM_001143820	231	238	96	ENSG00000134954	ETS1
bta-miR-760-3p	NM_001143828	173	180	98	ENSG00000134489	HRH4
bta-miR-27a-3p	NM_001143831	3352	3359	96	ENSG00000168959	GRM5
bta-miR-760-3p	NM_001143835	783	790	95	ENSG00000170322	NFRKB
bta-miR-25-27602	NM_001143838	1200	1207	99	ENSG00000141485	SLC13A5
bta-miR-5-37255	NM_001143852	381	388	98	ENSG00000139437	TCHP
bta-miR-1249	NM_001143958	2780	2787	98	ENSG00000112697	TMEM30A
bta-miR-874	NM_001143959	175	182	98	ENSG00000237651	C2orf74
bta-miR-874	NM_001143960	175	182	98	ENSG00000237651	C2orf74
bta-miR-330	NM_001143989	206	213	97	ENSG00000196427	NBPF4
bta-miR-874	NM_001144012	166	173	95	ENSG00000213593	TMX2
bta-miR-5-37255	NM_001144059	125	132	98	ENSG00000182667	NTM
bta-miR-221	NM_001144382	155	162	95	ENSG00000154822	PLCL2
bta-miR-27a-3p	NM_001144382	144	151	98	ENSG00000154822	PLCL2
bta-miR-222	NM_001144382	155	162	95	ENSG00000154822	PLCL2
bta-miR-2350	NM_001144758	842	849	95	ENSG00000019144	PHLDB1
bta-miR-2350	NM_001144759	842	849	95	ENSG00000019144	PHLDB1
bta-miR-2331-3p	NM_001144774	305	312	95	ENSG00000162374	ELAVL4
bta-miR-2331-3p	NM_001144775	305	312	95	ENSG00000162374	ELAVL4
bta-miR-2331-3p	NM_001144776	305	312	95	ENSG00000162374	ELAVL4
bta-miR-2331-3p	NM_001144777	305	312	95	ENSG00000162374	ELAVL4
bta-miR-2448-3p	NM_001144875	832	839	95	ENSG00000146094	DOK3
bta-miR-2448-3p	NM_001144876	832	839	95	ENSG00000146094	DOK3
bta-miR-2387	NM_001144892	2523	2530	98	ENSG00000113578	FGF1
bta-miR-18a	NM_001144892	3023	3030	99	ENSG00000113578	FGF1
bta-miR-18a	NM_001144934	3023	3030	99	ENSG00000113578	FGF1
bta-miR-2387	NM_001144934	2523	2530	98	ENSG00000113578	FGF1
bta-miR-2387	NM_001144935	2523	2530	98	ENSG00000113578	FGF1
bta-miR-18a	NM_001144935	3023	3030	99	ENSG00000113578	FGF1
bta-miR-24-3p	NM_001144955	1246	1253	95	ENSG00000104047	DTWD1
bta-miR-361	NM_001144960	97	104	96	ENSG00000206199	ANKUB1
bta-miR-2331-3p	NM_001144972	22	29	99	ENSG00000167208	SNX20
bta-miR-326	NM_001144990	1792	1799	95	ENSG00000174145	NWD2
bta-miR-27a-3p	NM_001145001	1046	1053	97	ENSG00000119408	NEK6
bta-miR-326	NM_001145026	230	237	99	ENSG00000139304	PTPRQ
bta-miR-330	NM_001145029	138	145	99	ENSG00000180777	ANKRD30B
bta-miR-2331-3p	NM_001145036	46	53	96	ENSG00000135775	COG2
bta-miR-27a-3p	NM_001145065	334	341	97	ENSG00000184305	CCSER1
bta-miR-326	NM_001145065	481	488	96	ENSG00000184305	CCSER1
bta-miR-2331-3p	NM_001145080	319	326	98	ENSG00000180336	MEIOC
bta-miR-330	NM_001145080	1515	1521	96	ENSG00000180336	MEIOC
bta-miR-19-17220	NM_001145152	539	546	96	ENSG00000155975	VPS37A
bta-miR-330	NM_001145152	177	184	99	ENSG00000155975	VPS37A
bta-miR-760-3p	NM_001145154	394	401	99	ENSG00000185842	DNAH14
bta-miR-27a-3p	NM_001145155	149	156	96	ENSG00000185551	NR2F2
bta-miR-27a-3p	NM_001145156	149	156	96	ENSG00000185551	NR2F2
bta-miR-27a-3p	NM_001145157	149	156	96	ENSG00000185551	NR2F2
bta-miR-2387	NM_001145191	715	722	98	ENSG00000237765	FAM200B
bta-miR-5-37953	NM_001145194	1470	1477	99	ENSG00000231824	AKAIN1
bta-miR-378	NM_001145195	423	429	96	ENSG00000148482	SLC39A12
bta-miR-24-3p	NM_001145211	172	179	98	ENSG00000137491	SLCO2B1
bta-miR-24-3p	NM_001145212	172	179	98	ENSG00000137491	SLCO2B1
bta-miR-25-27602	NM_001145264	87	94	99	ENSG00000116586	LAMTOR2
bta-miR-1-1319	NM_001145277	15	22	97	ENSG00000157191	NECAP2
bta-miR-4-36127	NM_001145277	15	22	97	ENSG00000157191	NECAP2
[truncated: 6,837 more rows]

## Sheet: Table S1c.RED MODULE
Table S1c. Predicted Target genes for miRNA members of the RED module
miRNAs	TRANSCRIPT ID	UTR.start	UTR.end	context.score.percentile	ensembl_gene_id	hgnc_symbol
bta-miR-8-44984	NM_000091	863	870	96	ENSG00000169031	COL4A3
bta-miR-8-44984	NM_000104	2606	2613	97	ENSG00000138061	CYP1B1
bta-miR-23-25909	NM_000127	303	310	99	ENSG00000182197	EXT1
bta-miR-26-29685	NM_000127	303	310	99	ENSG00000182197	EXT1
bta-miR-8-44984	NM_000142	1441	1448	96	ENSG00000068078	FGFR3
bta-miR-2285v	NM_000219	2116	2123	97	ENSG00000180509	KCNE1
bta-miR-26-29685	NM_000222	1997	2004	97	ENSG00000157404	KIT
bta-miR-23-25909	NM_000222	1997	2004	97	ENSG00000157404	KIT
bta-miR-13-8622	NM_000260	233	240	96	ENSG00000137474	MYO7A
bta-miR-13-8622	NM_000297	406	413	95	ENSG00000118762	PKD2
bta-miR-23-25909	NM_000313	1120	1127	98	ENSG00000184500	PROS1
bta-miR-26-29685	NM_000313	1120	1127	98	ENSG00000184500	PROS1
bta-miR-2285v	NM_000319	820	827	95	ENSG00000139197	PEX5
bta-miR-23-25909	NM_000345	1619	1626	97	ENSG00000145335	SNCA
bta-miR-26-29685	NM_000345	1619	1626	97	ENSG00000145335	SNCA
bta-miR-10-2785	NM_000379	92	99	99	ENSG00000158125	XDH
bta-miR-10-2785	NM_000379	116	123	99	ENSG00000158125	XDH
bta-miR-13-8622	NM_000381	173	179	96	ENSG00000101871	MID1
bta-miR-10-2785	NM_000397	283	290	99	ENSG00000165168	CYBB
bta-miR-23-25381	NM_000406	2531	2538	97	ENSG00000109163	GNRHR
bta-miR-13-8186	NM_000406	2531	2538	97	ENSG00000109163	GNRHR
bta-miR-10-3364	NM_000406	2531	2538	97	ENSG00000109163	GNRHR
bta-miR-8-44984	NM_000446	478	485	95	ENSG00000005421	PON1
bta-miR-10-2785	NM_000446	384	391	96	ENSG00000005421	PON1
bta-miR-10-2785	NM_000484	790	797	97	ENSG00000142192	APP
bta-miR-10-2785	NM_000495	251	258	95	ENSG00000188153	COL4A5
bta-miR-14-9195	NM_000511	207	214	98	ENSG00000176920	FUT2
bta-miR-18-16340	NM_000511	207	214	98	ENSG00000176920	FUT2
bta-miR-26-29685	NM_000534	57	64	99	ENSG00000064933	PMS1
bta-miR-23-25909	NM_000534	57	64	99	ENSG00000064933	PMS1
bta-miR-10-2785	NM_000538	1524	1531	99	ENSG00000133111	RFXAP
bta-miR-14-9195	NM_000616	786	793	99	ENSG00000010610	CD4
bta-miR-18-16340	NM_000616	786	793	99	ENSG00000010610	CD4
bta-miR-10-3364	NM_000627	898	905	99	ENSG00000049323	LTBP1
bta-miR-9-46570	NM_000627	477	484	98	ENSG00000049323	LTBP1
bta-miR-13-8186	NM_000627	898	905	99	ENSG00000049323	LTBP1
bta-miR-23-25381	NM_000627	898	905	99	ENSG00000049323	LTBP1
bta-miR-X-48106	NM_000627	477	484	98	ENSG00000049323	LTBP1
bta-miR-8-44984	NM_000633	148	155	99	ENSG00000171791	BCL2
bta-miR-8-44984	NM_000635	1270	1277	98	ENSG00000087903	RFX2
bta-miR-17-14144	NM_000668	1260	1267	99	ENSG00000196616	ADH1B
bta-miR-17-14144	NM_000687	389	396	97	ENSG00000101444	AHCY
bta-miR-8-44984	NM_000705	155	162	98	ENSG00000186009	ATP4B
bta-miR-18-16340	NM_000759	591	598	97	ENSG00000108342	CSF3
bta-miR-14-9195	NM_000759	591	598	97	ENSG00000108342	CSF3
bta-miR-23-25909	NM_000765	392	398	96	ENSG00000160870	CYP3A7
bta-miR-26-29685	NM_000765	392	398	96	ENSG00000160870	CYP3A7
bta-miR-17-14144	NM_000791	749	756	98	ENSG00000228716	DHFR
bta-miR-8-44984	NM_000792	949	955	97	ENSG00000211452	DIO1
bta-miR-10-2785	NM_000811	249	256	99	ENSG00000145863	GABRA6
bta-miR-18-16340	NM_000813	192	198	96	ENSG00000145864	GABRB2
bta-miR-14-9195	NM_000813	192	198	96	ENSG00000145864	GABRB2
bta-miR-8-44984	NM_000817	1155	1162	98	ENSG00000128683	GAD1
bta-miR-X-48106	NM_000821	2459	2466	97	ENSG00000115486	GGCX
bta-miR-9-46570	NM_000821	2459	2466	97	ENSG00000115486	GGCX
bta-miR-26-29685	NM_000827	2580	2586	95	ENSG00000155511	GRIA1
bta-miR-23-25909	NM_000827	2580	2586	95	ENSG00000155511	GRIA1
bta-miR-8-44984	NM_000861	268	275	96	ENSG00000196639	HRH1
bta-miR-26-29685	NM_000866	292	299	99	ENSG00000179097	HTR1F
bta-miR-23-25909	NM_000866	292	299	99	ENSG00000179097	HTR1F
bta-miR-26-29685	NM_000899	4278	4284	95	ENSG00000049130	KITLG
bta-miR-23-25909	NM_000899	4278	4284	95	ENSG00000049130	KITLG
bta-miR-13-8622	NM_000916	2607	2613	96	ENSG00000180914	OXTR
bta-miR-X-48106	NM_000917	254	261	99	ENSG00000122884	P4HA1
bta-miR-9-46570	NM_000917	254	261	99	ENSG00000122884	P4HA1
bta-miR-8-44984	NM_000929	784	791	99	ENSG00000127472	PLA2G5
bta-miR-X-48106	NM_000949	91	98	98	ENSG00000113494	PRLR
bta-miR-9-46570	NM_000949	91	98	98	ENSG00000113494	PRLR
bta-miR-17-14144	NM_000949	8193	8200	96	ENSG00000113494	PRLR
bta-miR-13-8186	NM_000959	3802	3809	96	ENSG00000122420	PTGFR
bta-miR-10-3364	NM_000959	3802	3809	96	ENSG00000122420	PTGFR
bta-miR-23-25381	NM_000959	3802	3809	96	ENSG00000122420	PTGFR
bta-miR-26-29685	NM_000997	124	131	99	ENSG00000145592	RPL37
bta-miR-23-25909	NM_000997	124	131	99	ENSG00000145592	RPL37
bta-miR-23-25381	NM_001001132	1093	1100	96	ENSG00000205726	ITSN1
bta-miR-13-8186	NM_001001132	1093	1100	96	ENSG00000205726	ITSN1
bta-miR-10-3364	NM_001001132	1093	1100	96	ENSG00000205726	ITSN1
bta-miR-8-44984	NM_001001290	57	64	99	ENSG00000109667	SLC2A9
bta-miR-23-25381	NM_001001331	541	548	96	ENSG00000157087	ATP2B2
bta-miR-13-8186	NM_001001331	541	548	96	ENSG00000157087	ATP2B2
bta-miR-10-3364	NM_001001331	541	548	96	ENSG00000157087	ATP2B2
bta-miR-26-29685	NM_001001483	172	179	98	ENSG00000177054	ZDHHC13
bta-miR-23-25909	NM_001001483	172	179	98	ENSG00000177054	ZDHHC13
bta-miR-2285v	NM_001001890	241	248	95	ENSG00000159216	RUNX1
bta-miR-13-8186	NM_001001936	958	965	98	ENSG00000169129	AFAP1L2
bta-miR-10-3364	NM_001001936	958	965	98	ENSG00000169129	AFAP1L2
bta-miR-23-25381	NM_001001936	958	965	98	ENSG00000169129	AFAP1L2
bta-miR-14-9195	NM_001002295	918	924	95	ENSG00000107485	GATA3
bta-miR-18-16340	NM_001002295	918	924	95	ENSG00000107485	GATA3
bta-miR-13-8622	NM_001002811	180	187	97	ENSG00000178104	PDE4DIP
bta-miR-13-8622	NM_001002812	180	187	97	ENSG00000178104	PDE4DIP
bta-miR-X-48106	NM_001002926	1536	1543	97	ENSG00000105849	TWISTNB
bta-miR-9-46570	NM_001002926	1536	1543	97	ENSG00000105849	TWISTNB
bta-miR-17-14144	NM_001003674	5198	5205	97	ENSG00000168675	LDLRAD4
bta-miR-17-14144	NM_001003675	5198	5205	97	ENSG00000168675	LDLRAD4
bta-miR-23-25909	NM_001003688	391	398	95	ENSG00000170365	SMAD1
bta-miR-26-29685	NM_001003688	391	398	95	ENSG00000170365	SMAD1
bta-miR-8-44984	NM_001003716	2012	2019	96	ENSG00000108469	RECQL5
bta-miR-26-29685	NM_001003841	1196	1203	96	ENSG00000174358	SLC6A19
bta-miR-23-25909	NM_001003841	1196	1203	96	ENSG00000174358	SLC6A19
bta-miR-8-44984	NM_001005242	178	185	99	ENSG00000057294	PKP2
bta-miR-23-25909	NM_001005271	1109	1116	99	ENSG00000170004	CHD3
bta-miR-26-29685	NM_001005271	1109	1116	99	ENSG00000170004	CHD3
bta-miR-23-25909	NM_001005273	1109	1116	99	ENSG00000170004	CHD3
bta-miR-26-29685	NM_001005273	1109	1116	99	ENSG00000170004	CHD3
bta-miR-26-29685	NM_001005386	2308	2314	95	ENSG00000138071	ACTR2
bta-miR-23-25909	NM_001005386	2308	2314	95	ENSG00000138071	ACTR2
bta-miR-13-8186	NM_001005407	644	651	98	ENSG00000196557	CACNA1H
bta-miR-10-3364	NM_001005407	644	651	98	ENSG00000196557	CACNA1H
bta-miR-23-25381	NM_001005407	644	651	98	ENSG00000196557	CACNA1H
bta-miR-26-29685	NM_001007024	2739	2746	98	ENSG00000108587	GOSR1
bta-miR-23-25909	NM_001007024	2739	2746	98	ENSG00000108587	GOSR1
bta-miR-23-25909	NM_001007025	2739	2746	98	ENSG00000108587	GOSR1
bta-miR-26-29685	NM_001007025	2739	2746	98	ENSG00000108587	GOSR1
bta-miR-8-44984	NM_001007067	291	298	95	ENSG00000137575	SDCBP
bta-miR-8-44984	NM_001007068	291	298	95	ENSG00000137575	SDCBP
bta-miR-8-44984	NM_001007069	291	298	95	ENSG00000137575	SDCBP
bta-miR-8-44984	NM_001007070	291	298	95	ENSG00000137575	SDCBP
bta-miR-X-48106	NM_001007075	285	292	96	ENSG00000109790	KLHL5
bta-miR-9-46570	NM_001007075	285	292	96	ENSG00000109790	KLHL5
bta-miR-10-2785	NM_001007471	796	803	99	ENSG00000083067	TRPM3
bta-miR-23-25381	NM_001007544	147	154	96	ENSG00000263961	C1orf186
bta-miR-13-8186	NM_001007544	147	154	96	ENSG00000263961	C1orf186
bta-miR-10-3364	NM_001007544	147	154	96	ENSG00000263961	C1orf186
bta-miR-X-48106	NM_001008225	1381	1388	98	ENSG00000080802	CNOT4
bta-miR-9-46570	NM_001008225	1381	1388	98	ENSG00000080802	CNOT4
bta-miR-8-44984	NM_001008226	1152	1159	95	ENSG00000188659	SAXO2
bta-miR-17-14144	NM_001008270	68	75	98	ENSG00000165076	PRSS37
bta-miR-26-29685	NM_001008388	2667	2674	95	ENSG00000145354	CISD2
bta-miR-23-25909	NM_001008388	2667	2674	95	ENSG00000145354	CISD2
bta-miR-10-2785	NM_001008392	384	391	97	ENSG00000144677	CTDSPL
bta-miR-X-48106	NM_001008397	1999	2006	95	ENSG00000164294	GPX8
bta-miR-9-46570	NM_001008397	1999	2006	95	ENSG00000164294	GPX8
bta-miR-9-46570	NM_001009555	748	755	97	ENSG00000109686	SH3D19
bta-miR-X-48106	NM_001009555	748	755	97	ENSG00000109686	SH3D19
bta-miR-9-46570	NM_001009612	974	981	99	ENSG00000215595	C20orf202
bta-miR-X-48106	NM_001009612	974	981	99	ENSG00000215595	C20orf202
bta-miR-23-25381	NM_001009931	696	703	96	ENSG00000197915	HRNR
bta-miR-10-3364	NM_001009931	696	703	96	ENSG00000197915	HRNR
bta-miR-13-8186	NM_001009931	696	703	96	ENSG00000197915	HRNR
bta-miR-13-8622	NM_001010862	2820	2827	99	ENSG00000204271	SPIN3
bta-miR-10-2785	NM_001010875	2105	2112	97	ENSG00000174032	SLC25A30
bta-miR-13-8622	NM_001010904	127	134	98	ENSG00000203972	GLYATL3
bta-miR-26-29685	NM_001010942	893	900	96	ENSG00000127314	RAP1B
bta-miR-23-25909	NM_001010942	893	900	96	ENSG00000127314	RAP1B
bta-miR-26-29685	NM_001011655	740	747	95	ENSG00000145014	TMEM44
bta-miR-23-25909	NM_001011655	740	747	95	ENSG00000145014	TMEM44
bta-miR-10-2785	NM_001011885	1273	1280	96	ENSG00000064726	BTBD1
bta-miR-8-44984	NM_001012333	66	73	97	ENSG00000110492	MDK
bta-miR-8-44984	NM_001012334	66	73	97	ENSG00000110492	MDK
bta-miR-10-2785	NM_001012393	5062	5069	99	ENSG00000183715	OPCML
bta-miR-10-2785	NM_001012643	398	405	98	ENSG00000176182	MYPOP
bta-miR-10-3364	NM_001012763	2640	2647	97	ENSG00000109163	GNRHR
bta-miR-23-25381	NM_001012763	2640	2647	97	ENSG00000109163	GNRHR
bta-miR-13-8186	NM_001012763	2640	2647	97	ENSG00000109163	GNRHR
bta-miR-23-25909	NM_001012980	103	110	97	ENSG00000184788	SATL1
bta-miR-26-29685	NM_001012980	103	110	97	ENSG00000184788	SATL1
bta-miR-10-2785	NM_001012993	214	221	95	ENSG00000188959	C9orf152
bta-miR-23-25909	NM_001013620	286	293	98	ENSG00000175548	ALG10B
bta-miR-26-29685	NM_001013620	286	293	98	ENSG00000175548	ALG10B
bta-miR-8-44984	NM_001013641	40	47	97	ENSG00000162460	TMEM82
bta-miR-9-46570	NM_001013848	657	664	97	ENSG00000138190	EXOC6
bta-miR-X-48106	NM_001013848	657	664	97	ENSG00000138190	EXOC6
bta-miR-10-3364	NM_001015891	255	262	99	ENSG00000085231	AK6
bta-miR-10-3364	NM_001015891	255	262	99	ENSG00000279247	AK6
bta-miR-23-25381	NM_001015891	255	262	99	ENSG00000085231	AK6
bta-miR-23-25381	NM_001015891	255	262	99	ENSG00000279247	AK6
bta-miR-13-8186	NM_001015891	255	262	99	ENSG00000085231	AK6
bta-miR-13-8186	NM_001015891	255	262	99	ENSG00000279247	AK6
bta-miR-10-2785	NM_001017403	53	60	98	ENSG00000133067	LGR6
bta-miR-10-2785	NM_001017404	53	60	98	ENSG00000133067	LGR6
bta-miR-8-44984	NM_001017424	1802	1808	95	ENSG00000082482	KCNK2
bta-miR-8-44984	NM_001017425	1802	1808	95	ENSG00000082482	KCNK2
bta-miR-X-48106	NM_001017962	254	261	99	ENSG00000122884	P4HA1
bta-miR-9-46570	NM_001017962	254	261	99	ENSG00000122884	P4HA1
bta-miR-24-26839	NM_001018037	202	209	99	ENSG00000197969	VPS13A
bta-miR-8-44984	NM_001018089	2420	2427	99	ENSG00000128915	ICE2
bta-miR-13-8622	NM_001018111	3267	3274	96	ENSG00000128567	PODXL
bta-miR-10-2785	NM_001023560	895	902	97	ENSG00000197062	ZSCAN26
bta-miR-10-3364	NM_001023563	7138	7145	96	ENSG00000204524	ZNF805
bta-miR-23-25381	NM_001023563	7138	7145	96	ENSG00000204524	ZNF805
bta-miR-13-8186	NM_001023563	7138	7145	96	ENSG00000204524	ZNF805
bta-miR-13-8622	NM_001023563	7309	7316	98	ENSG00000204524	ZNF805
bta-miR-23-25909	NM_001023570	360	367	99	ENSG00000173226	IQCB1
bta-miR-26-29685	NM_001023570	360	367	99	ENSG00000173226	IQCB1
bta-miR-26-29685	NM_001023571	360	367	99	ENSG00000173226	IQCB1
bta-miR-23-25909	NM_001023571	360	367	99	ENSG00000173226	IQCB1
bta-miR-17-14144	NM_001024074	27	34	95	ENSG00000150540	HNMT
bta-miR-8-44984	NM_001024380	52	59	98	ENSG00000169490	TM2D2
bta-miR-8-44984	NM_001024381	52	59	98	ENSG00000169490	TM2D2
bta-miR-23-25909	NM_001024660	1500	1507	99	ENSG00000160145	KALRN
bta-miR-26-29685	NM_001024660	1500	1507	99	ENSG00000160145	KALRN
bta-miR-13-8622	NM_001024808	48	55	95	ENSG00000110987	BCL7A
bta-miR-X-48106	NM_001024948	2982	2989	99	ENSG00000137942	FNBP1L
bta-miR-9-46570	NM_001024948	2982	2989	99	ENSG00000137942	FNBP1L
bta-miR-10-2785	NM_001025356	710	717	95	ENSG00000177119	ANO6
bta-miR-17-14144	NM_001029884	2037	2044	98	ENSG00000120278	PLEKHG1
bta-miR-10-2785	NM_001031	46	53	96	ENSG00000233927	RPS28
bta-miR-9-46570	NM_001031617	1082	1089	96	ENSG00000240230	COX19
bta-miR-X-48106	NM_001031617	1082	1089	96	ENSG00000240230	COX19
bta-miR-13-8622	NM_001031717	939	946	98	ENSG00000163703	CRELD1
bta-miR-13-8622	NM_001031722	112	118	97	ENSG00000235658	ATAT1
bta-miR-13-8622	NM_001031722	112	118	97	ENSG00000229061	ATAT1
bta-miR-13-8622	NM_001031722	112	118	97	ENSG00000231257	ATAT1
bta-miR-13-8622	NM_001031722	112	118	97	ENSG00000223752	ATAT1
bta-miR-13-8622	NM_001031722	112	118	97	ENSG00000206488	ATAT1
bta-miR-13-8622	NM_001031722	112	118	97	ENSG00000137343	ATAT1
bta-miR-13-8622	NM_001031722	112	118	97	ENSG00000234549	ATAT1
bta-miR-23-25909	NM_001031739	79	86	99	ENSG00000102048	ASB9
bta-miR-26-29685	NM_001031739	79	86	99	ENSG00000102048	ASB9
bta-miR-14-9195	NM_001031804	679	685	95	ENSG00000178573	MAF
bta-miR-18-16340	NM_001031804	679	685	95	ENSG00000178573	MAF
bta-miR-23-25381	NM_001031812	2231	2238	96	ENSG00000151292	CSNK1G3
bta-miR-13-8186	NM_001031812	2231	2238	96	ENSG00000151292	CSNK1G3
bta-miR-10-3364	NM_001031812	2231	2238	96	ENSG00000151292	CSNK1G3
bta-miR-9-46570	NM_001032289	550	557	98	ENSG00000102100	SLC35A2
bta-miR-X-48106	NM_001032289	550	557	98	ENSG00000102100	SLC35A2
bta-miR-23-25381	NM_001035260	145	152	95	ENSG00000122958	VPS26A
bta-miR-10-3364	NM_001035260	145	152	95	ENSG00000122958	VPS26A
bta-miR-13-8186	NM_001035260	145	152	95	ENSG00000122958	VPS26A
bta-miR-10-2785	NM_001037582	291	298	97	ENSG00000145284	SCD5
bta-miR-10-3364	NM_001039538	410	417	97	ENSG00000078018	MAP2
bta-miR-13-8186	NM_001039538	410	417	97	ENSG00000078018	MAP2
bta-miR-23-25381	NM_001039538	410	417	97	ENSG00000078018	MAP2
bta-miR-13-8622	NM_001039547	571	578	95	ENSG00000175066	GK5
bta-miR-8-44984	NM_001039548	40	47	97	ENSG00000149243	KLHL35
bta-miR-10-2785	NM_001039569	327	334	98	ENSG00000152056	AP1S3
bta-miR-10-3364	NM_001039585	4068	4075	96	ENSG00000122420	PTGFR
bta-miR-13-8186	NM_001039585	4068	4075	96	ENSG00000122420	PTGFR
bta-miR-23-25381	NM_001039585	4068	4075	96	ENSG00000122420	PTGFR
bta-miR-8-44984	NM_001039690	223	230	99	ENSG00000168802	CHTF8
bta-miR-14-9195	NM_001039693	2960	2967	98	ENSG00000162971	TYW5
bta-miR-18-16340	NM_001039693	2960	2967	98	ENSG00000162971	TYW5
bta-miR-8-44984	NM_001039715	949	955	97	ENSG00000211452	DIO1
bta-miR-8-44984	NM_001039716	1013	1019	97	ENSG00000211452	DIO1
bta-miR-13-8622	NM_001039780	636	643	99	ENSG00000205089	CCNI2
bta-miR-10-2785	NM_001039840	6039	6045	95	ENSG00000204116	CHIC1
bta-miR-13-8622	NM_001040092	21	28	97	ENSG00000136960	ENPP2
bta-miR-8-44984	NM_001040125	326	333	96	ENSG00000040487	PQLC2
bta-miR-8-44984	NM_001040126	326	333	96	ENSG00000040487	PQLC2
bta-miR-8-44984	NM_001040146	223	230	99	ENSG00000168802	CHTF8
bta-miR-13-8186	NM_001040179	65	72	96	ENSG00000152034	MCHR2
bta-miR-23-25381	NM_001040179	65	72	96	ENSG00000152034	MCHR2
bta-miR-10-3364	NM_001040179	65	72	96	ENSG00000152034	MCHR2
bta-miR-10-2785	NM_001040274	192	198	95	ENSG00000153157	SYCP2L
bta-miR-13-8186	NM_001040429	3602	3609	97	ENSG00000118946	PCDH17
bta-miR-23-25381	NM_001040429	3602	3609	97	ENSG00000118946	PCDH17
bta-miR-10-3364	NM_001040429	3602	3609	97	ENSG00000118946	PCDH17
bta-miR-17-14144	NM_001040436	130	137	99	ENSG00000139131	YARS2
bta-miR-26-29685	NM_001040876	77	83	96	ENSG00000164163	ABCE1
bta-miR-23-25909	NM_001040876	77	83	96	ENSG00000164163	ABCE1
bta-miR-8-44984	NM_001042482	760	767	98	ENSG00000196511	TPK1
bta-miR-X-48106	NM_001042498	681	688	98	ENSG00000102100	SLC35A2
bta-miR-9-46570	NM_001042498	681	688	98	ENSG00000102100	SLC35A2
bta-miR-23-25909	NM_001042552	605	612	95	ENSG00000203705	TATDN3
bta-miR-23-25909	NM_001042553	605	612	95	ENSG00000203705	TATDN3
bta-miR-8-44984	NM_001042555	698	705	97	ENSG00000166225	FRS2
bta-miR-17-14144	NM_001042601	2985	2992	97	ENSG00000163728	TTC14
bta-miR-X-48106	NM_001042705	109	116	98	ENSG00000214216	IQCJ
bta-miR-9-46570	NM_001042705	109	116	98	ENSG00000214216	IQCJ
bta-miR-26-29685	NM_001043351	1986	1992	96	ENSG00000143549	TPM3
bta-miR-23-25909	NM_001043351	1986	1992	96	ENSG00000143549	TPM3
bta-miR-26-29685	NM_001043352	3346	3352	96	ENSG00000143549	TPM3
bta-miR-23-25909	NM_001043352	3346	3352	96	ENSG00000143549	TPM3
bta-miR-26-29685	NM_001043353	3346	3352	96	ENSG00000143549	TPM3
bta-miR-23-25909	NM_001043353	3346	3352	96	ENSG00000143549	TPM3
bta-miR-9-46570	NM_001044387	337	344	98	ENSG00000130544	ZNF557
bta-miR-X-48106	NM_001044387	337	344	98	ENSG00000130544	ZNF557
bta-miR-9-46570	NM_001044388	337	344	98	ENSG00000130544	ZNF557
bta-miR-X-48106	NM_001044388	337	344	98	ENSG00000130544	ZNF557
bta-miR-13-8186	NM_001044723	2231	2238	96	ENSG00000151292	CSNK1G3
bta-miR-23-25381	NM_001044723	2231	2238	96	ENSG00000151292	CSNK1G3
bta-miR-10-3364	NM_001044723	2231	2238	96	ENSG00000151292	CSNK1G3
bta-miR-13-8186	NM_001075098	2440	2447	96	ENSG00000124615	MOCS1
bta-miR-10-3364	NM_001075098	2440	2447	96	ENSG00000124615	MOCS1
bta-miR-23-25381	NM_001075098	2440	2447	96	ENSG00000124615	MOCS1
bta-miR-10-2785	NM_001077196	753	760	95	ENSG00000128655	PDE11A
bta-miR-10-2785	NM_001077197	753	760	95	ENSG00000128655	PDE11A
bta-miR-10-2785	NM_001077394	212	219	99	ENSG00000117543	DPH5
bta-miR-10-2785	NM_001077395	212	219	99	ENSG00000117543	DPH5
bta-miR-13-8622	NM_001077415	751	758	98	ENSG00000163703	CRELD1
bta-miR-8-44984	NM_001077500	1330	1337	95	ENSG00000129451	KLK10
bta-miR-13-8622	NM_001077657	81	88	99	ENSG00000214097	SMCO1
bta-miR-26-29685	NM_001077700	3272	3279	97	ENSG00000198160	MIER1
bta-miR-23-25909	NM_001077700	3272	3279	97	ENSG00000198160	MIER1
bta-miR-26-29685	NM_001077701	3272	3279	97	ENSG00000198160	MIER1
bta-miR-23-25909	NM_001077701	3272	3279	97	ENSG00000198160	MIER1
bta-miR-23-25909	NM_001077702	1791	1798	97	ENSG00000198160	MIER1
bta-miR-26-29685	NM_001077702	1791	1798	97	ENSG00000198160	MIER1
bta-miR-26-29685	NM_001077703	1791	1798	97	ENSG00000198160	MIER1
bta-miR-23-25909	NM_001077703	1791	1798	97	ENSG00000198160	MIER1
bta-miR-23-25909	NM_001077704	1791	1798	97	ENSG00000198160	MIER1
bta-miR-26-29685	NM_001077704	1791	1798	97	ENSG00000198160	MIER1
bta-miR-17-14144	NM_001078166	4279	4286	99	ENSG00000136450	SRSF1
bta-miR-13-8622	NM_001080396	311	317	95	ENSG00000204442	FAM155A
bta-miR-X-48106	NM_001080472	27	34	98	ENSG00000197296	FITM2
bta-miR-9-46570	NM_001080472	27	34	98	ENSG00000197296	FITM2
bta-miR-23-25909	NM_001080479	123	130	97	ENSG00000214944	ARHGEF28
bta-miR-26-29685	NM_001080479	123	130	97	ENSG00000214944	ARHGEF28
bta-miR-10-2785	NM_001080497	337	344	97	ENSG00000106780	MEGF9
bta-miR-13-8622	NM_001080529	161	167	95	ENSG00000122574	WIPF3
bta-miR-13-8622	NM_001080546	821	828	96	ENSG00000150433	TMEM218
bta-miR-8-44984	NM_001080779	848	855	97	ENSG00000197879	MYO1C
bta-miR-8-44984	NM_001080950	848	855	97	ENSG00000197879	MYO1C
bta-miR-10-3364	NM_001081492	1979	1986	97	ENSG00000167767	KRT80
bta-miR-23-25381	NM_001081492	1979	1986	97	ENSG00000167767	KRT80
bta-miR-13-8186	NM_001081492	1979	1986	97	ENSG00000167767	KRT80
bta-miR-8-44984	NM_001083893	156	163	99	ENSG00000196792	STRN3
bta-miR-17-14144	NM_001083914	1296	1303	95	ENSG00000175029	CTBP2
bta-miR-26-29685	NM_001085411	1574	1581	95	ENSG00000152620	NADK2
bta-miR-23-25909	NM_001085411	1574	1581	95	ENSG00000152620	NADK2
bta-miR-26-29685	NM_001093772	1997	2004	97	ENSG00000157404	KIT
bta-miR-23-25909	NM_001093772	1997	2004	97	ENSG00000157404	KIT
bta-miR-14-9195	NM_001097638	207	214	98	ENSG00000176920	FUT2
bta-miR-18-16340	NM_001097638	207	214	98	ENSG00000176920	FUT2
bta-miR-17-14144	NM_001098	377	384	99	ENSG00000100412	ACO2
bta-miR-8-44984	NM_001098211	268	275	96	ENSG00000196639	HRH1
bta-miR-8-44984	NM_001098212	268	275	96	ENSG00000196639	HRH1
bta-miR-8-44984	NM_001098213	268	275	96	ENSG00000196639	HRH1
bta-miR-8-44984	NM_001098268	516	523	98	ENSG00000174405	LIG4
bta-miR-13-8622	NM_001098624	173	179	96	ENSG00000101871	MID1
bta-miR-18-16340	NM_001099221	466	473	99	ENSG00000255833	TIFAB
bta-miR-14-9195	NM_001099221	466	473	99	ENSG00000255833	TIFAB
bta-miR-X-48106	NM_001099337	214	221	97	ENSG00000135469	COQ10A
bta-miR-9-46570	NM_001099337	214	221	97	ENSG00000135469	COQ10A
bta-miR-13-8186	NM_001099855	110	117	98	ENSG00000101977	MCF2
bta-miR-10-3364	NM_001099855	110	117	98	ENSG00000101977	MCF2
bta-miR-23-25381	NM_001099855	110	117	98	ENSG00000101977	MCF2
bta-miR-2285v	NM_001099952	1524	1531	97	ENSG00000150995	ITPR1
bta-miR-10-2785	NM_001100397	360	367	98	ENSG00000091428	RAPGEF4
bta-miR-26-29685	NM_001100409	2339	2346	99	ENSG00000112701	SENP6
bta-miR-23-25909	NM_001100409	2339	2346	99	ENSG00000112701	SENP6
bta-miR-23-25381	NM_001100829	263	270	95	ENSG00000205269	TMEM170B
bta-miR-10-3364	NM_001100829	263	270	95	ENSG00000205269	TMEM170B
bta-miR-13-8186	NM_001100829	263	270	95	ENSG00000205269	TMEM170B
bta-miR-13-8622	NM_001101676	7753	7760	99	ENSG00000177570	SAMD12
bta-miR-10-2785	NM_001102669	1127	1134	98	ENSG00000133818	RRAS2
bta-miR-18-16340	NM_001103160	547	554	96	ENSG00000189410	SH2D5
bta-miR-14-9195	NM_001103160	547	554	96	ENSG00000189410	SH2D5
bta-miR-18-16340	NM_001103161	547	554	96	ENSG00000189410	SH2D5
bta-miR-14-9195	NM_001103161	547	554	96	ENSG00000189410	SH2D5
bta-miR-10-2785	NM_001103176	1511	1518	98	ENSG00000146910	CNPY1
bta-miR-17-14144	NM_001104554	2844	2851	97	ENSG00000137819	PAQR5
bta-miR-17-14144	NM_001105244	604	611	95	ENSG00000173482	PTPRM
bta-miR-X-48106	NM_001109903	993	1000	95	ENSG00000135119	RNFT2
bta-miR-9-46570	NM_001109903	993	1000	95	ENSG00000135119	RNFT2
bta-miR-10-2785	NM_001111039	895	902	97	ENSG00000197062	ZSCAN26
bta-miR-X-48106	NM_001111061	1468	1474	96	ENSG00000177551	NHLH2
bta-miR-9-46570	NM_001111061	1468	1474	96	ENSG00000177551	NHLH2
bta-miR-10-2785	NM_001111077	251	258	97	ENSG00000092820	EZR
bta-miR-8-44984	NM_001111322	524	531	96	ENSG00000123064	DDX54
bta-miR-13-8622	NM_001112717	281	288	98	ENSG00000064042	LIMCH1
bta-miR-13-8622	NM_001112718	281	288	98	ENSG00000064042	LIMCH1
bta-miR-13-8622	NM_001112719	281	288	98	ENSG00000064042	LIMCH1
bta-miR-13-8622	NM_001112720	281	288	98	ENSG00000064042	LIMCH1
bta-miR-9-46570	NM_001112800	2739	2745	95	ENSG00000183023	SLC8A1
bta-miR-X-48106	NM_001112800	2739	2745	95	ENSG00000183023	SLC8A1
bta-miR-X-48106	NM_001112801	2739	2745	95	ENSG00000183023	SLC8A1
bta-miR-9-46570	NM_001112801	2739	2745	95	ENSG00000183023	SLC8A1
bta-miR-9-46570	NM_001112802	2739	2745	95	ENSG00000183023	SLC8A1
bta-miR-X-48106	NM_001112802	2739	2745	95	ENSG00000183023	SLC8A1
bta-miR-13-8622	NM_001113182	295	302	95	ENSG00000204256	BRD2
bta-miR-13-8622	NM_001113182	295	302	95	ENSG00000235307	BRD2
bta-miR-13-8622	NM_001113182	295	302	95	ENSG00000234704	BRD2
bta-miR-13-8622	NM_001113182	295	302	95	ENSG00000230678	BRD2
bta-miR-13-8622	NM_001113182	295	302	95	ENSG00000234507	BRD2
bta-miR-13-8622	NM_001113182	295	302	95	ENSG00000215077	BRD2
bta-miR-13-8622	NM_001113182	295	302	95	ENSG00000236227	BRD2
bta-miR-23-25909	NM_001113402	922	929	96	ENSG00000151743	AMN1
bta-miR-26-29685	NM_001113402	922	929	95	ENSG00000151743	AMN1
bta-miR-13-8622	NM_001113561	863	870	95	ENSG00000164197	RNF180
bta-miR-13-8622	NM_001114118	1260	1267	96	ENSG00000074356	NCBP3
bta-miR-26-29685	NM_001114183	2580	2586	95	ENSG00000155511	GRIA1
bta-miR-23-25909	NM_001114183	2580	2586	95	ENSG00000155511	GRIA1
bta-miR-13-8622	NM_001115113	262	269	97	ENSG00000162923	WDR26
bta-miR-18-16340	NM_001118885	1165	1171	95	ENSG00000101958	GLRA2
bta-miR-14-9195	NM_001118885	1165	1171	95	ENSG00000101958	GLRA2
bta-miR-14-9195	NM_001118886	1165	1171	95	ENSG00000101958	GLRA2
bta-miR-18-16340	NM_001118886	1165	1171	95	ENSG00000101958	GLRA2
bta-miR-26-29685	NM_001122608	1284	1290	96	ENSG00000004961	HCCS
bta-miR-23-25909	NM_001122608	1284	1290	96	ENSG00000004961	HCCS
bta-miR-23-25381	NM_001122779	624	631	98	ENSG00000124019	FAM124B
bta-miR-13-8186	NM_001122779	624	631	98	ENSG00000124019	FAM124B
bta-miR-10-3364	NM_001122779	624	631	98	ENSG00000124019	FAM124B
bta-miR-17-14144	NM_001123	525	532	98	ENSG00000156110	ADK
bta-miR-17-14144	NM_001123387	212	219	95	ENSG00000261852	KRTAP2-1
bta-miR-17-14144	NM_001123387	212	219	95	ENSG00000212725	KRTAP2-1
bta-miR-10-2785	NM_001123395	396	403	95	ENSG00000164007	CLDN19
bta-miR-8-44984	NM_001126123	2039	2046	98	ENSG00000132199	ENOSF1
bta-miR-13-8622	NM_001127180	233	240	96	ENSG00000137474	MYO7A
bta-miR-8-44984	NM_001127211	551	558	96	ENSG00000187164	SHTN1
bta-miR-2285v	NM_001127668	2116	2123	97	ENSG00000180509	KCNE1
bta-miR-2285v	NM_001127669	2116	2123	97	ENSG00000180509	KCNE1
bta-miR-2285v	NM_001127670	2116	2123	97	ENSG00000180509	KCNE1
bta-miR-23-25909	NM_001127671	6143	6150	96	ENSG00000113594	LIFR
bta-miR-26-29685	NM_001127671	6143	6150	96	ENSG00000113594	LIFR
bta-miR-17-14144	NM_001127889	78	85	95	ENSG00000090487	SPG21
bta-miR-17-14144	NM_001127890	78	85	95	ENSG00000090487	SPG21
bta-miR-23-25909	NM_001128128	218	224	95	ENSG00000148516	ZEB1
bta-miR-10-3364	NM_001128128	276	283	97	ENSG00000148516	ZEB1
bta-miR-23-25381	NM_001128128	276	283	97	ENSG00000148516	ZEB1
bta-miR-26-29685	NM_001128128	218	224	95	ENSG00000148516	ZEB1
bta-miR-13-8186	NM_001128128	276	283	97	ENSG00000148516	ZEB1
bta-miR-26-29685	NM_001128143	57	64	99	ENSG00000064933	PMS1
bta-miR-23-25909	NM_001128143	57	64	99	ENSG00000064933	PMS1
bta-miR-26-29685	NM_001128144	57	64	99	ENSG00000064933	PMS1
bta-miR-23-25909	NM_001128144	57	64	99	ENSG00000064933	PMS1
bta-miR-23-25381	NM_001128160	1712	1719	99	ENSG00000153560	UBP1
bta-miR-13-8186	NM_001128160	1712	1719	99	ENSG00000153560	UBP1
bta-miR-10-3364	NM_001128160	1712	1719	99	ENSG00000153560	UBP1
bta-miR-13-8186	NM_001128161	1712	1719	99	ENSG00000153560	UBP1
bta-miR-10-3364	NM_001128161	1712	1719	99	ENSG00000153560	UBP1
bta-miR-23-25381	NM_001128161	1712	1719	99	ENSG00000153560	UBP1
bta-miR-13-8622	NM_001128427	271	278	98	ENSG00000168843	FSTL5
bta-miR-13-8622	NM_001128428	271	278	98	ENSG00000168843	FSTL5
bta-miR-13-8186	NM_001128595	2422	2429	98	ENSG00000276776	TC2N
bta-miR-13-8186	NM_001128595	2422	2429	98	ENSG00000165929	TC2N
bta-miR-10-3364	NM_001128595	2422	2429	98	ENSG00000276776	TC2N
bta-miR-10-3364	NM_001128595	2422	2429	98	ENSG00000165929	TC2N
bta-miR-23-25381	NM_001128595	2422	2429	98	ENSG00000276776	TC2N
bta-miR-23-25381	NM_001128595	2422	2429	98	ENSG00000165929	TC2N
bta-miR-23-25381	NM_001128596	2422	2429	98	ENSG00000276776	TC2N
bta-miR-23-25381	NM_001128596	2422	2429	98	ENSG00000165929	TC2N
bta-miR-13-8186	NM_001128596	2422	2429	98	ENSG00000276776	TC2N
bta-miR-13-8186	NM_001128596	2422	2429	98	ENSG00000165929	TC2N
bta-miR-10-3364	NM_001128596	2422	2429	98	ENSG00000276776	TC2N
bta-miR-10-3364	NM_001128596	2422	2429	98	ENSG00000165929	TC2N
bta-miR-10-2785	NM_001128617	185	192	98	ENSG00000135597	REPS1
bta-miR-26-29685	NM_001128918	452	459	98	ENSG00000075413	MARK3
bta-miR-23-25909	NM_001128918	452	459	98	ENSG00000075413	MARK3
bta-miR-26-29685	NM_001128919	452	459	98	ENSG00000075413	MARK3
bta-miR-23-25909	NM_001128919	452	459	98	ENSG00000075413	MARK3
bta-miR-23-25909	NM_001128920	452	459	98	ENSG00000075413	MARK3
bta-miR-26-29685	NM_001128920	452	459	98	ENSG00000075413	MARK3
bta-miR-26-29685	NM_001128921	452	459	98	ENSG00000075413	MARK3
bta-miR-23-25909	NM_001128921	452	459	98	ENSG00000075413	MARK3
bta-miR-X-48106	NM_001128923	748	755	97	ENSG00000109686	SH3D19
bta-miR-9-46570	NM_001128923	748	755	97	ENSG00000109686	SH3D19
bta-miR-X-48106	NM_001128924	748	755	97	ENSG00000109686	SH3D19
bta-miR-9-46570	NM_001128924	748	755	97	ENSG00000109686	SH3D19
bta-miR-26-29685	NM_001128930	489	496	98	ENSG00000197217	ENTPD4
bta-miR-23-25909	NM_001128930	489	496	98	ENSG00000197217	ENTPD4
bta-miR-X-48106	NM_001128932	244	251	97	ENSG00000171903	CYP4F11
bta-miR-9-46570	NM_001128932	244	251	97	ENSG00000171903	CYP4F11
bta-miR-10-2785	NM_001128933	6097	6104	99	ENSG00000172403	SYNPO2
bta-miR-10-2785	NM_001128934	1182	1189	99	ENSG00000172403	SYNPO2
bta-miR-8-44984	NM_001129727	412	419	95	ENSG00000196155	PLEKHG4
bta-miR-8-44984	NM_001129728	412	419	95	ENSG00000196155	PLEKHG4
bta-miR-8-44984	NM_001129729	412	419	95	ENSG00000196155	PLEKHG4
bta-miR-8-44984	NM_001129731	412	419	95	ENSG00000196155	PLEKHG4
bta-miR-13-8622	NM_001129896	165	172	98	ENSG00000102362	SYTL4
bta-miR-9-46570	NM_001130015	82	89	99	ENSG00000167612	ANKRD33
bta-miR-X-48106	NM_001130015	82	89	99	ENSG00000167612	ANKRD33
bta-miR-8-44984	NM_001130065	1298	1305	96	ENSG00000099331	MYO9B
bta-miR-9-46570	NM_001130528	3122	3129	99	ENSG00000008294	SPAG9
bta-miR-X-48106	NM_001130528	3122	3129	99	ENSG00000008294	SPAG9
bta-miR-26-29685	NM_001130701	3191	3198	97	ENSG00000198252	STYX
bta-miR-23-25909	NM_001130701	3191	3198	97	ENSG00000198252	STYX
bta-miR-8-44984	NM_001130720	316	323	95	ENSG00000158467	AHCYL2
bta-miR-8-44984	NM_001130722	316	323	95	ENSG00000158467	AHCYL2
bta-miR-8-44984	NM_001130723	316	323	95	ENSG00000158467	AHCYL2
bta-miR-13-8622	NM_001130863	21	28	97	ENSG00000136960	ENPP2
bta-miR-13-8622	NM_001130865	1287	1293	96	ENSG00000173253	DMRT2
bta-miR-8-44984	NM_001130910	252	259	99	ENSG00000121797	CCRL2
bta-miR-10-2785	NM_001130960	770	777	97	ENSG00000114805	PLCH1
bta-miR-10-2785	NM_001130961	2856	2863	97	ENSG00000114805	PLCH1
bta-miR-17-14144	NM_001131005	312	319	95	ENSG00000081189	MEF2C
bta-miR-2285v	NM_001131023	820	827	95	ENSG00000139197	PEX5
bta-miR-2285v	NM_001131024	820	827	95	ENSG00000139197	PEX5
bta-miR-2285v	NM_001131025	820	827	95	ENSG00000139197	PEX5
bta-miR-10-2785	NM_001134285	3600	3607	98	ENSG00000196482	ESRRG
bta-miR-18-16340	NM_001134296	268	275	99	ENSG00000070718	AP3M2
bta-miR-14-9195	NM_001134296	268	275	99	ENSG00000070718	AP3M2
bta-miR-23-25909	NM_001134367	60	67	95	ENSG00000131389	SLC6A6
bta-miR-26-29685	NM_001134367	60	67	95	ENSG00000131389	SLC6A6
bta-miR-10-3364	NM_001134418	94	101	99	ENSG00000090530	P3H2
bta-miR-13-8186	NM_001134418	94	101	99	ENSG00000090530	P3H2
bta-miR-23-25381	NM_001134418	94	101	99	ENSG00000090530	P3H2
bta-miR-26-29685	NM_001134848	198	205	99	ENSG00000198865	CCDC152
bta-miR-23-25909	NM_001134848	198	205	99	ENSG00000198865	CCDC152
bta-miR-17-14144	NM_001134855	75	82	95	ENSG00000162931	TRIM17
bta-miR-8-44984	NM_001135031	66	73	95	ENSG00000165702	GFI1B
bta-miR-X-48106	NM_001135215	541	548	96	ENSG00000235109	ZSCAN31
bta-miR-9-46570	NM_001135215	541	548	96	ENSG00000235109	ZSCAN31
bta-miR-9-46570	NM_001135216	541	548	96	ENSG00000235109	ZSCAN31
bta-miR-X-48106	NM_001135216	541	548	96	ENSG00000235109	ZSCAN31
bta-miR-26-29685	NM_001135247	332	338	97	ENSG00000117122	MFAP2
bta-miR-23-25909	NM_001135247	332	338	97	ENSG00000117122	MFAP2
bta-miR-26-29685	NM_001135248	332	338	97	ENSG00000117122	MFAP2
bta-miR-23-25909	NM_001135248	332	338	97	ENSG00000117122	MFAP2
bta-miR-18-16340	NM_001135553	599	605	96	ENSG00000079277	MKNK1
bta-miR-14-9195	NM_001135553	599	605	96	ENSG00000079277	MKNK1
bta-miR-23-25909	NM_001135699	101	108	99	ENSG00000164924	YWHAZ
bta-miR-26-29685	NM_001135699	101	108	99	ENSG00000164924	YWHAZ
bta-miR-23-25909	NM_001135700	101	108	99	ENSG00000164924	YWHAZ
bta-miR-26-29685	NM_001135700	101	108	99	ENSG00000164924	YWHAZ
bta-miR-23-25909	NM_001135701	101	108	99	ENSG00000164924	YWHAZ
bta-miR-26-29685	NM_001135701	101	108	99	ENSG00000164924	YWHAZ
bta-miR-26-29685	NM_001135702	101	108	99	ENSG00000164924	YWHAZ
bta-miR-23-25909	NM_001135702	101	108	99	ENSG00000164924	YWHAZ
bta-miR-9-46570	NM_001135953	40	46	95	ENSG00000165113	GKAP1
bta-miR-X-48106	NM_001135953	40	46	95	ENSG00000165113	GKAP1
bta-miR-8-44984	NM_001135999	43	50	95	ENSG00000198853	RUSC2
bta-miR-17-14144	NM_001136000	150	157	99	ENSG00000143322	ABL2
bta-miR-17-14144	NM_001136008	125	132	98	ENSG00000089356	FXYD3
bta-miR-10-2785	NM_001136016	790	797	97	ENSG00000142192	APP
bta-miR-24-26839	NM_001136022	102	109	97	ENSG00000100968	NFATC4
bta-miR-10-2785	NM_001136129	790	797	97	ENSG00000142192	APP
bta-miR-10-2785	NM_001136130	790	797	97	ENSG00000142192	APP
bta-miR-10-2785	NM_001136131	790	797	97	ENSG00000142192	APP
bta-miR-18-16340	NM_001136191	96	102	96	ENSG00000197256	KANK2
bta-miR-14-9195	NM_001136191	96	102	96	ENSG00000197256	KANK2
bta-miR-2285v	NM_001136191	175	182	96	ENSG00000197256	KANK2
bta-miR-8-44984	NM_001136200	1095	1102	99	ENSG00000166275	BORCS7
bta-miR-10-3364	NM_001139490	1492	1499	96	ENSG00000204104	TRAF3IP1
bta-miR-13-8186	NM_001139490	1492	1499	96	ENSG00000204104	TRAF3IP1
bta-miR-23-25381	NM_001139490	1492	1499	96	ENSG00000204104	TRAF3IP1
bta-miR-8-44984	NM_001139498	605	612	95	ENSG00000129682	FGF13
bta-miR-8-44984	NM_001139500	605	612	95	ENSG00000129682	FGF13
bta-miR-8-44984	NM_001139501	605	612	95	ENSG00000283147
bta-miR-8-44984	NM_001139502	605	612	95	ENSG00000283147
bta-miR-X-48106	NM_001142269	2459	2466	97	ENSG00000115486	GGCX
bta-miR-9-46570	NM_001142269	2459	2466	97	ENSG00000115486	GGCX
bta-miR-14-9195	NM_001142287	217	224	98	ENSG00000187764	SEMA4D
bta-miR-18-16340	NM_001142287	217	224	98	ENSG00000187764	SEMA4D
bta-miR-10-3364	NM_001142294	81	88	97	ENSG00000133104	SPG20
bta-miR-23-25381	NM_001142294	81	88	97	ENSG00000133104	SPG20
bta-miR-13-8186	NM_001142294	81	88	97	ENSG00000133104	SPG20
bta-miR-10-3364	NM_001142295	81	88	97	ENSG00000133104	SPG20
bta-miR-13-8186	NM_001142295	81	88	97	ENSG00000133104	SPG20
bta-miR-23-25381	NM_001142295	81	88	97	ENSG00000133104	SPG20
bta-miR-23-25381	NM_001142296	81	88	97	ENSG00000133104	SPG20
bta-miR-13-8186	NM_001142296	81	88	97	ENSG00000133104	SPG20
bta-miR-10-3364	NM_001142296	81	88	97	ENSG00000133104	SPG20
bta-miR-8-44984	NM_001142343	2876	2883	97	ENSG00000174600	CMKLR1
bta-miR-8-44984	NM_001142344	2876	2883	97	ENSG00000174600	CMKLR1
bta-miR-8-44984	NM_001142345	2876	2883	97	ENSG00000174600	CMKLR1
bta-miR-13-8622	NM_001142391	100	107	99	ENSG00000126903	SLC10A3
bta-miR-13-8622	NM_001142392	100	107	99	ENSG00000126903	SLC10A3
bta-miR-18-16340	NM_001142434	1493	1500	98	ENSG00000198408	MGEA5
bta-miR-14-9195	NM_001142434	1493	1500	98	ENSG00000198408	MGEA5
bta-miR-17-14144	NM_001142468	52	59	96	ENSG00000130349	C6orf203
bta-miR-17-14144	NM_001142470	52	59	96	ENSG00000130349	C6orf203
bta-miR-10-2785	NM_001142502	29	36	98	ENSG00000104881	PPP1R13L
bta-miR-8-44984	NM_001142505	1342	1349	96	ENSG00000172350	ABCG4
bta-miR-23-25381	NM_001142523	4836	4843	97	ENSG00000090376	IRAK3
bta-miR-13-8186	NM_001142523	4836	4843	97	ENSG00000090376	IRAK3
bta-miR-10-3364	NM_001142523	4836	4843	97	ENSG00000090376	IRAK3
bta-miR-17-14144	NM_001142531	109	116	95	ENSG00000095370	SH2D3C
bta-miR-17-14144	NM_001142532	109	116	95	ENSG00000095370	SH2D3C
bta-miR-17-14144	NM_001142533	109	116	95	ENSG00000095370	SH2D3C
bta-miR-17-14144	NM_001142534	109	116	95	ENSG00000095370	SH2D3C
bta-miR-23-25909	NM_001142544	536	543	97	ENSG00000150281	CTF1
bta-miR-26-29685	NM_001142544	536	543	97	ENSG00000150281	CTF1
bta-miR-13-8622	NM_001142550	660	667	98	ENSG00000085433	WDR47
bta-miR-13-8622	NM_001142551	660	667	98	ENSG00000085433	WDR47
bta-miR-10-2785	NM_001142568	228	235	98	ENSG00000114439	BBX
bta-miR-X-48106	NM_001142595	254	261	99	ENSG00000122884	P4HA1
bta-miR-9-46570	NM_001142595	254	261	99	ENSG00000122884	P4HA1
bta-miR-X-48106	NM_001142596	254	261	99	ENSG00000122884	P4HA1
bta-miR-9-46570	NM_001142596	254	261	99	ENSG00000122884	P4HA1
bta-miR-10-2785	NM_001142678	710	717	95	ENSG00000177119	ANO6
bta-miR-13-8186	NM_001142685	3694	3701	99	ENSG00000134909	ARHGAP32
bta-miR-23-25381	NM_001142685	3694	3701	99	ENSG00000134909	ARHGAP32
bta-miR-10-3364	NM_001142685	3694	3701	99	ENSG00000134909	ARHGAP32
bta-miR-23-25909	NM_001142771	435	442	97	ENSG00000150275	PCDH15
bta-miR-26-29685	NM_001142771	435	442	97	ENSG00000150275	PCDH15
bta-miR-26-29685	NM_001142772	435	442	97	ENSG00000150275	PCDH15
bta-miR-23-25909	NM_001142772	435	442	97	ENSG00000150275	PCDH15
bta-miR-17-14144	NM_001142883	802	809	95	ENSG00000161896	IP6K3
bta-miR-13-8622	NM_001143676	873	880	99	ENSG00000118515	SGK1
bta-miR-13-8622	NM_001143677	873	880	99	ENSG00000118515	SGK1
bta-miR-13-8622	NM_001143678	873	880	99	ENSG00000118515	SGK1
bta-miR-10-2785	NM_001143757	539	546	95	ENSG00000148814	LRRC27
bta-miR-10-2785	NM_001143824	1771	1777	97	ENSG00000139209	SLC38A4
bta-miR-10-2785	NM_001143836	154	161	95	ENSG00000086991	NOX4
bta-miR-13-8622	NM_001143836	1664	1671	98	ENSG00000086991	NOX4
bta-miR-13-8622	NM_001143837	1664	1671	98	ENSG00000086991	NOX4
bta-miR-10-2785	NM_001143837	154	161	95	ENSG00000086991	NOX4
bta-miR-13-8622	NM_001143981	59	66	97	ENSG00000101938	CHRDL1
bta-miR-13-8186	NM_001143981	282	289	98	ENSG00000101938	CHRDL1
bta-miR-10-3364	NM_001143981	282	289	98	ENSG00000101938	CHRDL1
bta-miR-23-25381	NM_001143981	282	289	98	ENSG00000101938	CHRDL1
bta-miR-13-8186	NM_001143982	282	289	98	ENSG00000101938	CHRDL1
bta-miR-23-25381	NM_001143982	282	289	98	ENSG00000101938	CHRDL1
bta-miR-10-3364	NM_001143982	282	289	98	ENSG00000101938	CHRDL1
bta-miR-13-8622	NM_001143982	59	66	97	ENSG00000101938	CHRDL1
bta-miR-13-8622	NM_001143983	59	66	97	ENSG00000101938	CHRDL1
bta-miR-13-8186	NM_001143983	282	289	98	ENSG00000101938	CHRDL1
bta-miR-23-25381	NM_001143983	282	289	98	ENSG00000101938	CHRDL1
bta-miR-10-3364	NM_001143983	282	289	98	ENSG00000101938	CHRDL1
bta-miR-13-8622	NM_001144071	47	54	99	ENSG00000166800	LDHAL6A
bta-miR-9-46570	NM_001144772	237	244	95	ENSG00000035681	NSMAF
bta-miR-X-48106	NM_001144772	237	244	95	ENSG00000035681	NSMAF
bta-miR-23-25909	NM_001144952	3676	3683	99	ENSG00000069188	SDK2
bta-miR-26-29685	NM_001144952	3676	3683	99	ENSG00000069188	SDK2
bta-miR-26-29685	NM_001144964	471	478	95	ENSG00000049759	NEDD4L
bta-miR-23-25909	NM_001144964	471	478	95	ENSG00000049759	NEDD4L
bta-miR-23-25909	NM_001144965	471	478	95	ENSG00000049759	NEDD4L
bta-miR-26-29685	NM_001144965	471	478	95	ENSG00000049759	NEDD4L
bta-miR-26-29685	NM_001144966	471	478	95	ENSG00000049759	NEDD4L
bta-miR-23-25909	NM_001144966	471	478	95	ENSG00000049759	NEDD4L
bta-miR-23-25909	NM_001144967	471	478	95	ENSG00000049759	NEDD4L
bta-miR-26-29685	NM_001144967	471	478	95	ENSG00000049759	NEDD4L
bta-miR-26-29685	NM_001144968	471	478	95	ENSG00000049759	NEDD4L
bta-miR-23-25909	NM_001144968	471	478	95	ENSG00000049759	NEDD4L
bta-miR-26-29685	NM_001144969	471	478	95	ENSG00000049759	NEDD4L
bta-miR-23-25909	NM_001144969	471	478	95	ENSG00000049759	NEDD4L
bta-miR-23-25909	NM_001144970	471	478	95	ENSG00000049759	NEDD4L
bta-miR-26-29685	NM_001144970	471	478	95	ENSG00000049759	NEDD4L
bta-miR-26-29685	NM_001144971	471	478	95	ENSG00000049759	NEDD4L
bta-miR-23-25909	NM_001144971	471	478	95	ENSG00000049759	NEDD4L
bta-miR-26-29685	NM_001145017	360	367	97	ENSG00000186334	SLC36A3
bta-miR-23-25909	NM_001145017	360	367	97	ENSG00000186334	SLC36A3
bta-miR-17-14144	NM_001145047	490	497	98	ENSG00000198522	GPN1
bta-miR-17-14144	NM_001145048	490	497	98	ENSG00000198522	GPN1
bta-miR-17-14144	NM_001145049	490	497	98	ENSG00000198522	GPN1
bta-miR-23-25381	NM_001145078	7138	7145	96	ENSG00000204524	ZNF805
bta-miR-10-3364	NM_001145078	7138	7145	96	ENSG00000204524	ZNF805
bta-miR-13-8622	NM_001145078	7309	7316	98	ENSG00000204524	ZNF805
bta-miR-13-8186	NM_001145078	7138	7145	96	ENSG00000204524	ZNF805
bta-miR-X-48106	NM_001145097	35	41	96	ENSG00000136603	SKIL
bta-miR-9-46570	NM_001145097	35	41	96	ENSG00000136603	SKIL
bta-miR-X-48106	NM_001145098	35	41	96	ENSG00000136603	SKIL
bta-miR-9-46570	NM_001145098	35	41	96	ENSG00000136603	SKIL
bta-miR-10-2785	NM_001145414	1453	1460	99	ENSG00000188419	CHM
bta-miR-8-44984	NM_001145438	749	756	96	ENSG00000148985	PGAP2
bta-miR-23-25381	NM_001145520	1258	1265	95	ENSG00000039560	RAI14
bta-miR-10-3364	NM_001145520	1258	1265	95	ENSG00000039560	RAI14
bta-miR-13-8186	NM_001145520	1258	1265	95	ENSG00000039560	RAI14
bta-miR-23-25381	NM_001145521	1258	1265	95	ENSG00000039560	RAI14
bta-miR-13-8186	NM_001145521	1258	1265	95	ENSG00000039560	RAI14
bta-miR-10-3364	NM_001145521	1258	1265	95	ENSG00000039560	RAI14
bta-miR-23-25381	NM_001145522	1258	1265	95	ENSG00000039560	RAI14
bta-miR-13-8186	NM_001145522	1258	1265	95	ENSG00000039560	RAI14
bta-miR-10-3364	NM_001145522	1258	1265	95	ENSG00000039560	RAI14
bta-miR-13-8186	NM_001145523	1258	1265	95	ENSG00000039560	RAI14
bta-miR-10-3364	NM_001145523	1258	1265	95	ENSG00000039560	RAI14
bta-miR-23-25381	NM_001145523	1258	1265	95	ENSG00000039560	RAI14
bta-miR-10-3364	NM_001145525	1258	1265	95	ENSG00000039560	RAI14
bta-miR-13-8186	NM_001145525	1258	1265	95	ENSG00000039560	RAI14
bta-miR-23-25381	NM_001145525	1258	1265	95	ENSG00000039560	RAI14
bta-miR-10-2785	NM_001145716	80	87	97	ENSG00000180316	PNPLA1
bta-miR-10-2785	NM_001145717	80	87	97	ENSG00000180316	PNPLA1
bta-miR-26-29685	NM_001145938	361	368	95	ENSG00000196611	MMP1
bta-miR-23-25909	NM_001145938	361	368	95	ENSG00000196611	MMP1
bta-miR-13-8622	NM_001145975	388	395	98	ENSG00000007216	SLC13A2
bta-miR-9-46570	NM_001146039	550	556	95	ENSG00000120370	GORAB
bta-miR-X-48106	NM_001146039	550	556	95	ENSG00000120370	GORAB
bta-miR-23-25909	NM_001146054	1619	1626	97	ENSG00000145335	SNCA
bta-miR-26-29685	NM_001146054	1619	1626	97	ENSG00000145335	SNCA
bta-miR-26-29685	NM_001146055	1619	1626	97	ENSG00000145335	SNCA
bta-miR-23-25909	NM_001146055	1619	1626	97	ENSG00000145335	SNCA
bta-miR-8-44984	NM_001146056	581	588	98	ENSG00000278519	MBOAT7
bta-miR-8-44984	NM_001146056	581	588	98	ENSG00000277025	MBOAT7
bta-miR-8-44984	NM_001146056	581	588	98	ENSG00000277923	MBOAT7
bta-miR-8-44984	NM_001146056	581	588	98	ENSG00000277733	MBOAT7
bta-miR-8-44984	NM_001146056	581	588	98	ENSG00000274194	MBOAT7
bta-miR-8-44984	NM_001146056	581	588	98	ENSG00000273592	MBOAT7
bta-miR-8-44984	NM_001146056	581	588	98	ENSG00000276935	MBOAT7
bta-miR-8-44984	NM_001146056	581	588	98	ENSG00000278322	MBOAT7
bta-miR-8-44984	NM_001146056	581	588	98	ENSG00000125505	MBOAT7
bta-miR-8-44984	NM_001146056	581	588	98	ENSG00000275118	MBOAT7
bta-miR-13-8622	NM_001146077	62	69	95	ENSG00000159261	CLDN14
bta-miR-13-8622	NM_001146078	62	69	95	ENSG00000159261	CLDN14
bta-miR-13-8622	NM_001146079	62	69	95	ENSG00000159261	CLDN14
bta-miR-8-44984	NM_001146083	581	588	98	ENSG00000278519	MBOAT7
bta-miR-8-44984	NM_001146083	581	588	98	ENSG00000277025	MBOAT7
bta-miR-8-44984	NM_001146083	581	588	98	ENSG00000277923	MBOAT7
bta-miR-8-44984	NM_001146083	581	588	98	ENSG00000277733	MBOAT7
bta-miR-8-44984	NM_001146083	581	588	98	ENSG00000274194	MBOAT7
bta-miR-8-44984	NM_001146083	581	588	98	ENSG00000273592	MBOAT7
bta-miR-8-44984	NM_001146083	581	588	98	ENSG00000276935	MBOAT7
bta-miR-8-44984	NM_001146083	581	588	98	ENSG00000278322	MBOAT7
bta-miR-8-44984	NM_001146083	581	588	98	ENSG00000125505	MBOAT7
bta-miR-8-44984	NM_001146083	581	588	98	ENSG00000275118	MBOAT7
bta-miR-23-25909	NM_001146110	3272	3279	97	ENSG00000198160	MIER1
bta-miR-26-29685	NM_001146110	3272	3279	97	ENSG00000198160	MIER1
bta-miR-26-29685	NM_001146111	1791	1798	97	ENSG00000198160	MIER1
bta-miR-23-25909	NM_001146111	1791	1798	97	ENSG00000198160	MIER1
bta-miR-26-29685	NM_001146112	3272	3279	97	ENSG00000198160	MIER1
bta-miR-23-25909	NM_001146112	3272	3279	97	ENSG00000198160	MIER1
bta-miR-26-29685	NM_001146113	1791	1798	97	ENSG00000198160	MIER1
bta-miR-23-25909	NM_001146113	1791	1798	97	ENSG00000198160	MIER1
bta-miR-26-29685	NM_001146116	1762	1769	98	ENSG00000160305	DIP2A
bta-miR-23-25909	NM_001146116	1762	1769	98	ENSG00000160305	DIP2A
bta-miR-23-25909	NM_001146169	694	701	95	ENSG00000203705	TATDN3
bta-miR-23-25909	NM_001146170	605	612	95	ENSG00000203705	TATDN3
bta-miR-23-25909	NM_001146171	605	612	95	ENSG00000203705	TATDN3
bta-miR-8-44984	NM_001146172	67	74	96	ENSG00000162723	SLAMF9
bta-miR-13-8622	NM_001146265	2590	2596	96	ENSG00000164604	GPR85
bta-miR-13-8622	NM_001146266	2590	2596	96	ENSG00000164604	GPR85
bta-miR-13-8622	NM_001146267	2590	2596	96	ENSG00000164604	GPR85
bta-miR-8-44984	NM_001146686	2129	2136	96	ENSG00000205835	GMNC
bta-miR-9-46570	NM_001153	713	720	99	ENSG00000196975	ANXA4
bta-miR-X-48106	NM_001153	713	720	99	ENSG00000196975	ANXA4
bta-miR-23-25909	NM_001153446	955	962	96	ENSG00000153130	SCOC
bta-miR-26-29685	NM_001153446	955	962	96	ENSG00000153130	SCOC
bta-miR-26-29685	NM_001153484	955	962	96	ENSG00000153130	SCOC
bta-miR-23-25909	NM_001153484	955	962	96	ENSG00000153130	SCOC
bta-miR-23-25909	NM_001153552	955	962	96	ENSG00000153130	SCOC
bta-miR-26-29685	NM_001153552	955	962	96	ENSG00000153130	SCOC
bta-miR-23-25909	NM_001153585	955	962	96	ENSG00000153130	SCOC
bta-miR-26-29685	NM_001153585	955	962	96	ENSG00000153130	SCOC
bta-miR-26-29685	NM_001153635	955	962	96	ENSG00000153130	SCOC
bta-miR-23-25909	NM_001153635	955	962	96	ENSG00000153130	SCOC
bta-miR-23-25909	NM_001153663	955	962	96	ENSG00000153130	SCOC
bta-miR-26-29685	NM_001153663	955	962	96	ENSG00000153130	SCOC
bta-miR-8-44984	NM_001159	57	64	99	ENSG00000138356	AOX1
bta-miR-10-2785	NM_001159644	341	348	95	ENSG00000140563	MCTP2
bta-miR-23-25909	NM_001160116	70	76	95	ENSG00000169609	C15orf40
bta-miR-26-29685	NM_001160116	70	76	95	ENSG00000169609	C15orf40
bta-miR-23-25909	NM_001160147	73	80	99	ENSG00000100523	DDHD1
bta-miR-26-29685	NM_001160147	73	80	99	ENSG00000100523	DDHD1
bta-miR-23-25909	NM_001160148	73	80	99	ENSG00000100523	DDHD1
bta-miR-26-29685	NM_001160148	73	80	99	ENSG00000100523	DDHD1
bta-miR-13-8186	NM_001160301	330	337	95	ENSG00000188641	DPYD
bta-miR-23-25381	NM_001160301	330	337	95	ENSG00000188641	DPYD
bta-miR-10-3364	NM_001160301	330	337	95	ENSG00000188641	DPYD
bta-miR-17-14144	NM_001160364	206	213	97	ENSG00000170537	TMC7
bta-miR-13-8622	NM_001161334	250	257	96	ENSG00000203814	HIST2H2BF
bta-miR-17-14144	NM_001161766	389	396	97	ENSG00000101444	AHCY
bta-miR-10-2785	NM_001161779	290	297	97	ENSG00000164951	PDP1
bta-miR-10-2785	NM_001161780	290	297	97	ENSG00000164951	PDP1
bta-miR-10-2785	NM_001161781	290	297	97	ENSG00000164951	PDP1
bta-miR-13-8622	NM_001162383	375	382	97	ENSG00000116584	ARHGEF2
bta-miR-13-8622	NM_001162384	375	382	97	ENSG00000116584	ARHGEF2
bta-miR-13-8622	NM_001162429	2956	2962	97	ENSG00000170248	PDCD6IP
bta-miR-17-14144	NM_001162429	606	613	98	ENSG00000170248	PDCD6IP
bta-miR-8-44984	NM_001163213	1441	1448	96	ENSG00000068078	FGFR3
bta-miR-17-14144	NM_001163278	4441	4448	96	ENSG00000009694	TENM1
bta-miR-17-14144	NM_001163279	4441	4448	96	ENSG00000009694	TENM1
bta-miR-26-29685	NM_001163380	1116	1123	96	ENSG00000129472	RAB2B
bta-miR-23-25909	NM_001163380	1116	1123	96	ENSG00000129472	RAB2B
bta-miR-10-2785	NM_001163922	952	959	95	ENSG00000186806	VSIG10L
bta-miR-23-25381	NM_001163942	768	775	98	ENSG00000004846	ABCB5
bta-miR-13-8186	NM_001163942	768	775	98	ENSG00000004846	ABCB5
bta-miR-10-3364	NM_001163942	768	775	98	ENSG00000004846	ABCB5
bta-miR-13-8186	NM_001164245	536	543	96	ENSG00000157181	C1orf27
bta-miR-10-3364	NM_001164245	536	543	96	ENSG00000157181	C1orf27
bta-miR-23-25381	NM_001164245	536	543	96	ENSG00000157181	C1orf27
bta-miR-23-25381	NM_001164246	536	543	96	ENSG00000157181	C1orf27
bta-miR-10-3364	NM_001164246	536	543	96	ENSG00000157181	C1orf27
bta-miR-13-8186	NM_001164246	536	543	96	ENSG00000157181	C1orf27
bta-miR-10-2785	NM_001164386	559	566	96	ENSG00000158987	RAPGEF6
bta-miR-10-2785	NM_001164387	559	566	96	ENSG00000158987	RAPGEF6
bta-miR-10-2785	NM_001164388	559	566	96	ENSG00000158987	RAPGEF6
bta-miR-X-48106	NM_001164473	1735	1742	99	ENSG00000137942	FNBP1L
bta-miR-9-46570	NM_001164473	1735	1742	99	ENSG00000137942	FNBP1L
bta-miR-8-44984	NM_001164473	81	88	99	ENSG00000137942	FNBP1L
bta-miR-23-25381	NM_001164615	207	214	96	ENSG00000164930	FZD6
bta-miR-13-8186	NM_001164615	207	214	96	ENSG00000164930	FZD6
bta-miR-10-3364	NM_001164615	207	214	96	ENSG00000164930	FZD6
bta-miR-23-25381	NM_001164616	207	214	96	ENSG00000164930	FZD6
bta-miR-10-3364	NM_001164616	207	214	96	ENSG00000164930	FZD6
bta-miR-13-8186	NM_001164616	207	214	96	ENSG00000164930	FZD6
bta-miR-8-44984	NM_001164688	531	538	96	ENSG00000198570	RD3
bta-miR-23-25909	NM_001164694	3096	3103	99	ENSG00000009765	IYD
bta-miR-26-29685	NM_001164694	3096	3103	99	ENSG00000009765	IYD
bta-miR-26-29685	NM_001164695	3183	3190	99	ENSG00000009765	IYD
bta-miR-23-25909	NM_001164695	3183	3190	99	ENSG00000009765	IYD
bta-miR-X-48106	NM_001164749	2954	2960	95	ENSG00000151322	NPAS3
bta-miR-9-46570	NM_001164749	2954	2960	95	ENSG00000151322	NPAS3
bta-miR-10-2785	NM_001164796	856	863	96	ENSG00000282739	SLC25A26
bta-miR-10-2785	NM_001164796	856	863	96	ENSG00000144741	SLC25A26
bta-miR-13-8622	NM_001164811	624	631	99	ENSG00000232838	PET117
bta-miR-10-2785	NM_001164841	294	301	95	ENSG00000214113	LYRM4
bta-miR-X-48106	NM_001165893	2954	2960	95	ENSG00000151322	NPAS3
bta-miR-9-46570	NM_001165893	2954	2960	95	ENSG00000151322	NPAS3
bta-miR-13-8622	NM_001165974	433	440	95	ENSG00000159650	UROC1
bta-miR-10-2785	NM_001166133	142	149	99	ENSG00000138759	FRAS1
bta-miR-X-48106	NM_001166139	186	192	97	ENSG00000178177	LCORL
bta-miR-9-46570	NM_001166139	186	192	97	ENSG00000178177	LCORL
bta-miR-8-44984	NM_001166222	592	599	97	ENSG00000172508	CARNS1
bta-miR-26-29685	NM_001166247	1287	1294	98	ENSG00000164418	GRIK2
bta-miR-14-9195	NM_001166247	386	393	99	ENSG00000164418	GRIK2
bta-miR-18-16340	NM_001166247	386	393	99	ENSG00000164418	GRIK2
bta-miR-23-25909	NM_001166247	1287	1294	98	ENSG00000164418	GRIK2
bta-miR-10-3364	NM_001166264	898	905	99	ENSG00000049323	LTBP1
bta-miR-23-25381	NM_001166264	898	905	99	ENSG00000049323	LTBP1
bta-miR-13-8186	NM_001166264	898	905	99	ENSG00000049323	LTBP1
bta-miR-X-48106	NM_001166264	477	484	98	ENSG00000049323	LTBP1
bta-miR-9-46570	NM_001166264	477	484	98	ENSG00000049323	LTBP1
bta-miR-10-3364	NM_001166265	898	905	99	ENSG00000049323	LTBP1
bta-miR-13-8186	NM_001166265	898	905	99	ENSG00000049323	LTBP1
bta-miR-X-48106	NM_001166265	477	484	98	ENSG00000049323	LTBP1
bta-miR-9-46570	NM_001166265	477	484	98	ENSG00000049323	LTBP1
bta-miR-23-25381	NM_001166265	898	905	99	ENSG00000049323	LTBP1
bta-miR-X-48106	NM_001166266	477	484	98	ENSG00000049323	LTBP1
bta-miR-23-25381	NM_001166266	898	905	99	ENSG00000049323	LTBP1
bta-miR-9-46570	NM_001166266	477	484	98	ENSG00000049323	LTBP1
bta-miR-10-3364	NM_001166266	898	905	99	ENSG00000049323	LTBP1
bta-miR-13-8186	NM_001166266	898	905	99	ENSG00000049323	LTBP1
bta-miR-23-25909	NM_001166305	740	747	95	ENSG00000145014	TMEM44
bta-miR-26-29685	NM_001166305	740	747	95	ENSG00000145014	TMEM44
bta-miR-23-25909	NM_001166306	832	839	95	ENSG00000145014	TMEM44
bta-miR-26-29685	NM_001166306	832	839	95	ENSG00000145014	TMEM44
bta-miR-23-25909	NM_001166386	170	177	98	ENSG00000213401	MAGEA12
bta-miR-26-29685	NM_001166386	170	177	98	ENSG00000213401	MAGEA12
bta-miR-26-29685	NM_001166387	170	177	98	ENSG00000213401	MAGEA12
bta-miR-23-25909	NM_001166387	170	177	98	ENSG00000213401	MAGEA12
bta-miR-X-48106	NM_001167856	382	389	96	ENSG00000139697	SBNO1
bta-miR-9-46570	NM_001167856	382	389	96	ENSG00000139697	SBNO1
bta-miR-24-26839	NM_001167903	632	639	99	ENSG00000118855	MFSD1
bta-miR-9-46570	NM_001167928	123	130	99	ENSG00000196083	IL1RAP
bta-miR-X-48106	NM_001167928	123	130	99	ENSG00000196083	IL1RAP
bta-miR-X-48106	NM_001167929	123	130	99	ENSG00000196083	IL1RAP
bta-miR-9-46570	NM_001167929	123	130	99	ENSG00000196083	IL1RAP
bta-miR-8-44984	NM_001167931	443	450	99	ENSG00000196083	IL1RAP
bta-miR-17-14144	NM_001168236	150	157	99	ENSG00000143322	ABL2
bta-miR-17-14144	NM_001168237	150	157	99	ENSG00000143322	ABL2
bta-miR-17-14144	NM_001168238	150	157	99	ENSG00000143322	ABL2
bta-miR-17-14144	NM_001168239	150	157	99	ENSG00000143322	ABL2
bta-miR-2285v	NM_001168272	1524	1531	97	ENSG00000150995	ITPR1
bta-miR-8-44984	NM_001168468	516	523	97	ENSG00000172367	PDZD3
bta-miR-23-25909	NM_001168530	236	243	99	ENSG00000102048	ASB9
bta-miR-26-29685	NM_001168530	236	243	99	ENSG00000102048	ASB9
bta-miR-26-29685	NM_001168531	236	243	99	ENSG00000102048	ASB9
bta-miR-23-25909	NM_001168531	236	243	99	ENSG00000102048	ASB9
bta-miR-10-3364	NM_001169154	243	250	97	ENSG00000080572	PIH1D3
bta-miR-13-8186	NM_001169154	243	250	97	ENSG00000080572	PIH1D3
bta-miR-23-25381	NM_001169154	243	250	97	ENSG00000080572	PIH1D3
bta-miR-17-14144	NM_001170464	287	294	96	ENSG00000059758	CDK17
bta-miR-10-2785	NM_001170637	2743	2750	95	ENSG00000266028	SRGAP2
bta-miR-X-48106	NM_001171654	285	292	96	ENSG00000109790	KLHL5
bta-miR-9-46570	NM_001171654	285	292	96	ENSG00000109790	KLHL5
bta-miR-23-25381	NM_001171876	110	117	98	ENSG00000101977	MCF2
bta-miR-13-8186	NM_001171876	110	117	98	ENSG00000101977	MCF2
bta-miR-10-3364	NM_001171876	110	117	98	ENSG00000101977	MCF2
bta-miR-23-25381	NM_001171877	82	89	99	ENSG00000101977	MCF2
bta-miR-13-8186	NM_001171877	82	89	99	ENSG00000101977	MCF2
bta-miR-10-3364	NM_001171877	82	89	99	ENSG00000101977	MCF2
bta-miR-10-3364	NM_001171878	82	89	99	ENSG00000101977	MCF2
bta-miR-23-25381	NM_001171878	82	89	99	ENSG00000101977	MCF2
bta-miR-13-8186	NM_001171878	82	89	99	ENSG00000101977	MCF2
bta-miR-23-25381	NM_001171879	110	117	98	ENSG00000101977	MCF2
bta-miR-10-3364	NM_001171879	110	117	98	ENSG00000101977	MCF2
bta-miR-13-8186	NM_001171879	110	117	98	ENSG00000101977	MCF2
bta-miR-18-16340	NM_001171942	1165	1171	95	ENSG00000101958	GLRA2
bta-miR-14-9195	NM_001171942	1165	1171	95	ENSG00000101958	GLRA2
bta-miR-17-14144	NM_001171951	68	75	98	ENSG00000165076	PRSS37
bta-miR-26-29685	NM_001171991	1284	1290	96	ENSG00000004961	HCCS
bta-miR-23-25909	NM_001171991	1284	1290	96	ENSG00000004961	HCCS
bta-miR-17-14144	NM_001172631	170	177	96	ENSG00000196663	TECPR2
bta-miR-17-14144	NM_001172643	2926	2933	96	ENSG00000166548	TK2
bta-miR-17-14144	NM_001172644	2926	2933	96	ENSG00000166548	TK2
bta-miR-17-14144	NM_001172645	2926	2933	96	ENSG00000166548	TK2
bta-miR-13-8622	NM_001172656	702	709	96	ENSG00000159733	ZFYVE28
bta-miR-13-8622	NM_001172659	702	709	96	ENSG00000159733	ZFYVE28
bta-miR-13-8622	NM_001174068	165	172	98	ENSG00000102362	SYTL4
bta-miR-10-3364	NM_001174093	276	283	97	ENSG00000148516	ZEB1
bta-miR-26-29685	NM_001174093	218	224	95	ENSG00000148516	ZEB1
bta-miR-23-25381	NM_001174093	276	283	97	ENSG00000148516	ZEB1
bta-miR-13-8186	NM_001174093	276	283	97	ENSG00000148516	ZEB1
bta-miR-23-25909	NM_001174093	218	224	95	ENSG00000148516	ZEB1
bta-miR-23-25381	NM_001174094	276	283	97	ENSG00000148516	ZEB1
bta-miR-23-25909	NM_001174094	218	224	95	ENSG00000148516	ZEB1
bta-miR-26-29685	NM_001174094	218	224	95	ENSG00000148516	ZEB1
bta-miR-13-8186	NM_001174094	276	283	97	ENSG00000148516	ZEB1
bta-miR-10-3364	NM_001174094	276	283	97	ENSG00000148516	ZEB1
bta-miR-23-25909	NM_001174095	218	224	95	ENSG00000148516	ZEB1
bta-miR-13-8186	NM_001174095	276	283	97	ENSG00000148516	ZEB1
bta-miR-10-3364	NM_001174095	276	283	97	ENSG00000148516	ZEB1
bta-miR-26-29685	NM_001174095	218	224	95	ENSG00000148516	ZEB1
bta-miR-23-25381	NM_001174095	276	283	97	ENSG00000148516	ZEB1
bta-miR-26-29685	NM_001174096	218	224	95	ENSG00000148516	ZEB1
bta-miR-23-25381	NM_001174096	276	283	97	ENSG00000148516	ZEB1
bta-miR-13-8186	NM_001174096	276	283	97	ENSG00000148516	ZEB1
bta-miR-10-3364	NM_001174096	276	283	97	ENSG00000148516	ZEB1
bta-miR-23-25909	NM_001174096	218	224	95	ENSG00000148516	ZEB1
bta-miR-X-48106	NM_001174098	1324	1331	97	ENSG00000198246	SLC29A3
bta-miR-9-46570	NM_001174098	1324	1331	97	ENSG00000198246	SLC29A3
bta-miR-13-8622	NM_001174123	130	136	95	ENSG00000206043	C18orf63
bta-miR-10-2785	NM_001177314	1127	1134	98	ENSG00000133818	RRAS2
bta-miR-10-2785	NM_001177315	1127	1134	98	ENSG00000133818	RRAS2
bta-miR-13-8622	NM_001177381	187	194	99	ENSG00000137449	CPEB2
bta-miR-13-8622	NM_001177382	187	194	99	ENSG00000137449	CPEB2
bta-miR-13-8622	NM_001177383	187	194	99	ENSG00000137449	CPEB2
bta-miR-13-8622	NM_001177384	187	194	99	ENSG00000137449	CPEB2
bta-miR-26-29685	NM_001177693	123	130	97	ENSG00000214944	ARHGEF28
bta-miR-23-25909	NM_001177693	123	130	97	ENSG00000214944	ARHGEF28
bta-miR-13-8622	NM_001177969	286	293	99	ENSG00000205221	VIT
bta-miR-13-8622	NM_001177970	286	293	99	ENSG00000205221	VIT
bta-miR-13-8622	NM_001177971	286	293	99	ENSG00000205221	VIT
bta-miR-14-9195	NM_001178061	573	580	98	ENSG00000143434	SEMA6C
bta-miR-18-16340	NM_001178061	573	580	98	ENSG00000143434	SEMA6C
bta-miR-18-16340	NM_001178062	573	580	98	ENSG00000143434	SEMA6C
bta-miR-14-9195	NM_001178062	573	580	98	ENSG00000143434	SEMA6C
bta-miR-18-16340	NM_001178147	591	598	97	ENSG00000108342	CSF3
bta-miR-14-9195	NM_001178147	591	598	97	ENSG00000108342	CSF3
bta-miR-24-26839	NM_001184731	49	56	98	ENSG00000118702	GHRH
bta-miR-17-14144	NM_001184742	81	88	99	ENSG00000177485	ZBTB33
bta-miR-13-8622	NM_001184819	2092	2099	98	ENSG00000130119	GNL3L
bta-miR-13-8186	NM_001184965	77	84	99	ENSG00000131725	WDR44
bta-miR-23-25381	NM_001184965	77	84	99	ENSG00000131725	WDR44
bta-miR-10-3364	NM_001184965	77	84	99	ENSG00000131725	WDR44
bta-miR-23-25381	NM_001184966	77	84	99	ENSG00000131725	WDR44
bta-miR-10-3364	NM_001184966	77	84	99	ENSG00000131725	WDR44
bta-miR-13-8186	NM_001184966	77	84	99	ENSG00000131725	WDR44
bta-miR-13-8622	NM_001184993	72	79	99	ENSG00000132972	RNF17
bta-miR-23-25909	NM_001185059	244	251	98	ENSG00000083223	ZCCHC6
bta-miR-26-29685	NM_001185059	244	251	98	ENSG00000083223	ZCCHC6
bta-miR-23-25909	NM_001185074	244	251	98	ENSG00000083223	ZCCHC6
bta-miR-26-29685	NM_001185074	244	251	98	ENSG00000083223	ZCCHC6
bta-miR-8-44984	NM_001185093	116	123	98	ENSG00000158793	NIT1
bta-miR-8-44984	NM_001185094	116	123	98	ENSG00000158793	NIT1
bta-miR-10-2785	NM_001185117	330	337	96	ENSG00000164007	CLDN19
bta-miR-2285v	NM_001190481	532	539	96	ENSG00000092853	CLSPN
bta-miR-23-25381	NM_001190709	960	967	95	ENSG00000060718	COL11A1
bta-miR-13-8186	NM_001190709	960	967	95	ENSG00000060718	COL11A1
bta-miR-10-3364	NM_001190709	960	967	95	ENSG00000060718	COL11A1
bta-miR-23-25909	NM_001190826	91	98	97	ENSG00000196227	FAM217B
bta-miR-26-29685	NM_001190826	91	98	97	ENSG00000196227	FAM217B
bta-miR-26-29685	NM_001190827	91	98	97	ENSG00000196227	FAM217B
bta-miR-23-25909	NM_001190827	91	98	97	ENSG00000196227	FAM217B
bta-miR-17-14144	NM_001190844	67	74	96	ENSG00000188051	TMEM221
bta-miR-X-48106	NM_001190848	1381	1388	98	ENSG00000080802	CNOT4
bta-miR-9-46570	NM_001190848	1381	1388	98	ENSG00000080802	CNOT4
bta-miR-13-8622	NM_001190892	1486	1492	96	ENSG00000101327	PDYN
bta-miR-13-8622	NM_001190898	1486	1492	96	ENSG00000101327	PDYN
bta-miR-13-8622	NM_001190899	1486	1492	96	ENSG00000101327	PDYN
bta-miR-13-8622	NM_001190900	1486	1492	96	ENSG00000101327	PDYN
bta-miR-26-29685	NM_001190964	77	84	98	ENSG00000121741	ZMYM2
bta-miR-23-25909	NM_001190964	77	84	98	ENSG00000121741	ZMYM2
bta-miR-23-25909	NM_001190965	77	84	98	ENSG00000121741	ZMYM2
bta-miR-26-29685	NM_001190965	77	84	98	ENSG00000121741	ZMYM2
bta-miR-10-2785	NM_001190972	479	485	95	ENSG00000253250	C8orf88
bta-miR-14-9195	NM_001191029	619	626	97	ENSG00000224383	PRR29
bta-miR-18-16340	NM_001191029	619	626	97	ENSG00000224383	PRR29
bta-miR-8-44984	NM_001191037	40	47	99	ENSG00000173692	PSMD1
bta-miR-10-2785	NM_001193267	584	591	95	ENSG00000124523	SIRT5
bta-miR-13-8622	NM_001193277	173	179	96	ENSG00000101871	MID1
bta-miR-17-14144	NM_001193347	312	319	95	ENSG00000081189	MEF2C
bta-miR-17-14144	NM_001193348	312	319	95	ENSG00000081189	MEF2C
bta-miR-17-14144	NM_001193349	312	319	95	ENSG00000081189	MEF2C
bta-miR-17-14144	NM_001193350	312	319	95	ENSG00000081189	MEF2C
bta-miR-13-8622	NM_001193421	7744	7751	99	ENSG00000182463	TSHZ2
bta-miR-8-44984	NM_001193476	208	215	98	ENSG00000112053	SLC26A8
bta-miR-8-44984	NM_001193493	283	290	97	ENSG00000115902	SLC1A4
bta-miR-13-8622	NM_001195442	385	391	97	ENSG00000283473
bta-miR-23-25381	NM_001195622	462	469	97	ENSG00000197579	TOPORS
bta-miR-10-3364	NM_001195622	462	469	97	ENSG00000197579	TOPORS
bta-miR-13-8186	NM_001195622	462	469	97	ENSG00000197579	TOPORS
bta-miR-13-8622	NM_001195683	230	237	95	ENSG00000069702	TGFBR3
bta-miR-13-8622	NM_001195684	230	237	95	ENSG00000069702	TGFBR3
bta-miR-X-48106	NM_001197100	109	116	98	ENSG00000214216	IQCJ
bta-miR-9-46570	NM_001197100	109	116	98	ENSG00000214216	IQCJ
bta-miR-10-2785	NM_001197233	798	805	95	ENSG00000112763	BTN2A1
bta-miR-17-14144	NM_001197233	972	979	98	ENSG00000112763	BTN2A1
bta-miR-10-2785	NM_001198754	102	109	98	ENSG00000167083	GNGT2
bta-miR-10-2785	NM_001198755	102	109	98	ENSG00000167083	GNGT2
bta-miR-10-2785	NM_001198756	102	109	98	ENSG00000167083	GNGT2
bta-miR-10-2785	NM_001198862	327	334	98	ENSG00000065600	TMEM206
bta-miR-24-26839	NM_001199155	847	854	95	ENSG00000136504	KAT7
bta-miR-24-26839	NM_001199156	847	854	95	ENSG00000136504	KAT7
bta-miR-24-26839	NM_001199157	847	854	95	ENSG00000136504	KAT7
bta-miR-24-26839	NM_001199158	847	854	95	ENSG00000136504	KAT7
bta-miR-X-48106	NM_001199322	356	363	97	ENSG00000188428	BLOC1S5
bta-miR-9-46570	NM_001199322	356	363	97	ENSG00000188428	BLOC1S5
bta-miR-X-48106	NM_001199323	517	524	95	ENSG00000188428	BLOC1S5
bta-miR-9-46570	NM_001199323	517	524	95	ENSG00000188428	BLOC1S5
bta-miR-13-8622	NM_001199455	295	302	95	ENSG00000204256	BRD2
bta-miR-13-8622	NM_001199455	295	302	95	ENSG00000235307	BRD2
bta-miR-13-8622	NM_001199455	295	302	95	ENSG00000234704	BRD2
bta-miR-13-8622	NM_001199455	295	302	95	ENSG00000234507	BRD2
bta-miR-13-8622	NM_001199455	295	302	95	ENSG00000215077	BRD2
bta-miR-13-8622	NM_001199455	295	302	95	ENSG00000236227	BRD2
bta-miR-13-8622	NM_001199456	295	302	95	ENSG00000204256	BRD2
bta-miR-13-8622	NM_001199456	295	302	95	ENSG00000235307	BRD2
bta-miR-13-8622	NM_001199456	295	302	95	ENSG00000234704	BRD2
bta-miR-13-8622	NM_001199456	295	302	95	ENSG00000230678	BRD2
bta-miR-13-8622	NM_001199456	295	302	95	ENSG00000234507	BRD2
bta-miR-13-8622	NM_001199456	295	302	95	ENSG00000215077	BRD2
bta-miR-13-8622	NM_001199456	295	302	95	ENSG00000236227	BRD2
bta-miR-26-29685	NM_001199492	69	75	95	ENSG00000150593	PDCD4
bta-miR-23-25909	NM_001199492	69	75	95	ENSG00000150593	PDCD4
bta-miR-10-2785	NM_001199492	1332	1339	99	ENSG00000150593	PDCD4
bta-miR-X-48106	NM_001199579	1419	1426	98	ENSG00000100242	SUN2
bta-miR-9-46570	NM_001199579	1419	1426	98	ENSG00000100242	SUN2
bta-miR-18-16340	NM_001199579	37	44	97	ENSG00000100242	SUN2
bta-miR-14-9195	NM_001199579	37	44	97	ENSG00000100242	SUN2
bta-miR-18-16340	NM_001199580	37	44	97	ENSG00000100242	SUN2
bta-miR-14-9195	NM_001199580	37	44	97	ENSG00000100242	SUN2
bta-miR-9-46570	NM_001199580	1419	1426	98	ENSG00000100242	SUN2
bta-miR-X-48106	NM_001199580	1419	1426	98	ENSG00000100242	SUN2
bta-miR-23-25909	NM_001199775	510	517	96	ENSG00000108582	CPD
bta-miR-26-29685	NM_001199775	510	517	95	ENSG00000108582	CPD
bta-miR-10-2785	NM_001199779	378	385	99	ENSG00000126067	PSMB2
bta-miR-10-2785	NM_001199780	378	385	99	ENSG00000126067	PSMB2
bta-miR-17-14144	NM_001199847	2706	2713	96	ENSG00000198742	SMURF1
bta-miR-13-8622	NM_001199867	2209	2216	97	ENSG00000007047	MARK4
bta-miR-17-14144	NM_001199917	93	100	99	ENSG00000013375	PGM3
bta-miR-17-14144	NM_001199918	157	164	99	ENSG00000013375	PGM3
bta-miR-13-8622	NM_001199933	937	943	95	ENSG00000080546	SESN1
bta-miR-13-8622	NM_001199934	937	943	95	ENSG00000080546	SESN1
bta-miR-26-29685	NM_001201329	3557	3563	96	ENSG00000173281	PPP1R3B
bta-miR-23-25909	NM_001201329	3557	3563	96	ENSG00000173281	PPP1R3B
bta-miR-13-8622	NM_001201372	250	257	97	ENSG00000128596	CCDC136
bta-miR-17-14144	NM_001202449	525	532	98	ENSG00000156110	ADK
bta-miR-17-14144	NM_001202450	525	532	98	ENSG00000156110	ADK
bta-miR-8-44984	NM_001202558	946	953	95	ENSG00000257365	FNTB
bta-miR-8-44984	NM_001202559	946	953	95	ENSG00000125954	CHURC1-FNTB
bta-miR-13-8186	NM_001203250	934	941	99	ENSG00000132010	ZNF20
bta-miR-10-3364	NM_001203250	934	941	99	ENSG00000132010	ZNF20
bta-miR-23-25381	NM_001203250	934	941	99	ENSG00000132010	ZNF20
bta-miR-8-44984	NM_001204054	169	176	99	ENSG00000151366	NDUFC2
bta-miR-8-44984	NM_001204055	283	290	97	ENSG00000151366	NDUFC2
bta-miR-8-44984	NM_001204210	530	537	97	ENSG00000204278	TMEM235
bta-miR-8-44984	NM_001204211	530	537	97	ENSG00000204278	TMEM235
bta-miR-8-44984	NM_001204212	530	537	97	ENSG00000204278	TMEM235
bta-miR-13-8622	NM_001204240	340	346	95	ENSG00000099992	TBC1D10A
bta-miR-13-8622	NM_001204255	2316	2323	95	ENSG00000138760	SCARB2
bta-miR-10-2785	NM_001204301	790	797	97	ENSG00000142192	APP
bta-miR-10-2785	NM_001204302	790	797	97	ENSG00000142192	APP
bta-miR-10-2785	NM_001204303	790	797	97	ENSG00000142192	APP
bta-miR-17-14144	NM_001204314	8193	8200	96	ENSG00000113494	PRLR
bta-miR-9-46570	NM_001204314	91	98	98	ENSG00000113494	PRLR
bta-miR-X-48106	NM_001204314	91	98	98	ENSG00000113494	PRLR
bta-miR-23-25381	NM_001204514	142	149	95	ENSG00000075945	KIFAP3
bta-miR-13-8186	NM_001204514	142	149	95	ENSG00000075945	KIFAP3
bta-miR-10-3364	NM_001204514	142	149	95	ENSG00000075945	KIFAP3
bta-miR-10-3364	NM_001204516	142	149	95	ENSG00000075945	KIFAP3
bta-miR-13-8186	NM_001204516	142	149	95	ENSG00000075945	KIFAP3
bta-miR-23-25381	NM_001204516	142	149	95	ENSG00000075945	KIFAP3
bta-miR-10-3364	NM_001204517	142	149	95	ENSG00000075945	KIFAP3
bta-miR-13-8186	NM_001204517	142	149	95	ENSG00000075945	KIFAP3
bta-miR-23-25381	NM_001204517	142	149	95	ENSG00000075945	KIFAP3
bta-miR-8-44984	NM_001204747	971	978	96	ENSG00000035928	RFC1
bta-miR-17-14144	NM_001204747	855	862	96	ENSG00000035928	RFC1
bta-miR-10-2785	NM_001204803	710	717	95	ENSG00000177119	ANO6
bta-miR-10-2785	NM_001204813	560	567	97	ENSG00000135318	NT5E
bta-miR-17-14144	NM_001205028	182	189	99	ENSG00000111554	MDM1
bta-miR-26-29685	NM_001206615	3746	3752	97	ENSG00000135373	EHF
bta-miR-23-25909	NM_001206615	3746	3752	97	ENSG00000135373	EHF
bta-miR-23-25909	NM_001206616	3746	3752	97	ENSG00000135373	EHF
bta-miR-26-29685	NM_001206616	3746	3752	97	ENSG00000135373	EHF
bta-miR-13-8622	NM_001206999	2176	2182	96	ENSG00000122966	CIT
bta-miR-X-48106	NM_001207048	4015	4022	99	ENSG00000186318	BACE1
bta-miR-9-46570	NM_001207048	4015	4022	99	ENSG00000186318	BACE1
bta-miR-X-48106	NM_001207049	4015	4022	99	ENSG00000186318	BACE1
bta-miR-9-46570	NM_001207049	4015	4022	99	ENSG00000186318	BACE1
bta-miR-13-8622	NM_001242312	30	37	97	ENSG00000150510	FAM124A
bta-miR-26-29685	NM_001242532	156	163	99	ENSG00000092931	MFSD11
bta-miR-23-25909	NM_001242532	156	163	99	ENSG00000092931	MFSD11
bta-miR-26-29685	NM_001242533	156	163	99	ENSG00000092931	MFSD11
bta-miR-23-25909	NM_001242533	156	163	99	ENSG00000092931	MFSD11
bta-miR-26-29685	NM_001242534	156	163	99	ENSG00000092931	MFSD11
bta-miR-23-25909	NM_001242534	156	163	99	ENSG00000092931	MFSD11
bta-miR-26-29685	NM_001242535	156	163	99	ENSG00000092931	MFSD11
bta-miR-23-25909	NM_001242535	156	163	99	ENSG00000092931	MFSD11
bta-miR-23-25909	NM_001242536	156	163	99	ENSG00000092931	MFSD11
bta-miR-26-29685	NM_001242536	156	163	99	ENSG00000092931	MFSD11
bta-miR-26-29685	NM_001242537	156	163	99	ENSG00000092931	MFSD11
bta-miR-23-25909	NM_001242537	156	163	99	ENSG00000092931	MFSD11
bta-miR-17-14144	NM_001242628	1067	1074	97	ENSG00000145990	GFOD1
bta-miR-17-14144	NM_001242630	1067	1074	97	ENSG00000145990	GFOD1
bta-miR-10-2785	NM_001242815	2522	2529	99	ENSG00000205086	C2orf91
bta-miR-10-2785	NM_001242827	584	591	95	ENSG00000124523	SIRT5
bta-miR-X-48106	NM_001242854	1824	1831	98	ENSG00000132254	ARFIP2
bta-miR-9-46570	NM_001242854	1824	1831	98	ENSG00000132254	ARFIP2
bta-miR-9-46570	NM_001242855	1824	1831	98	ENSG00000132254	ARFIP2
bta-miR-X-48106	NM_001242855	1824	1831	98	ENSG00000132254	ARFIP2
bta-miR-X-48106	NM_001242856	1824	1831	98	ENSG00000132254	ARFIP2
bta-miR-9-46570	NM_001242856	1824	1831	98	ENSG00000132254	ARFIP2
bta-miR-18-16340	NM_001242920	114	120	96	ENSG00000100979	PLTP
bta-miR-14-9195	NM_001242920	114	120	96	ENSG00000100979	PLTP
bta-miR-18-16340	NM_001242921	114	120	96	ENSG00000100979	PLTP
bta-miR-14-9195	NM_001242921	114	120	96	ENSG00000100979	PLTP
bta-miR-9-46570	NM_001244	154	161	99	ENSG00000106952	TNFSF8
bta-miR-X-48106	NM_001244	154	161	99	ENSG00000106952	TNFSF8
bta-miR-23-25381	NM_001283	326	333	96	ENSG00000106367	AP1S1
bta-miR-13-8186	NM_001283	326	333	96	ENSG00000106367	AP1S1
bta-miR-10-3364	NM_001283	326	333	96	ENSG00000106367	AP1S1
bta-miR-9-46570	NM_001299	118	125	95	ENSG00000130176	CNN1
bta-miR-X-48106	NM_001299	118	125	95	ENSG00000130176	CNN1
bta-miR-26-29685	NM_001304	510	517	95	ENSG00000108582	CPD
bta-miR-23-25909	NM_001304	510	517	96	ENSG00000108582	CPD
bta-miR-17-14144	NM_001329	1296	1303	95	ENSG00000175029	CTBP2
bta-miR-23-25909	NM_001330	536	543	97	ENSG00000150281	CTF1
bta-miR-26-29685	NM_001330	536	543	97	ENSG00000150281	CTF1
bta-miR-23-25909	NM_001334	1661	1668	98	ENSG00000256043	CTSO
bta-miR-23-25909	NM_001334	1661	1668	98	ENSG00000263238	CTSO
bta-miR-26-29685	NM_001334	1661	1668	98	ENSG00000256043	CTSO
bta-miR-26-29685	NM_001334	1661	1668	98	ENSG00000263238	CTSO
bta-miR-17-14144	NM_001382	357	364	97	ENSG00000172269	DPAGT1
bta-miR-18-16340	NM_001433	751	758	99	ENSG00000178607	ERN1
bta-miR-14-9195	NM_001433	751	758	99	ENSG00000178607	ERN1
bta-miR-10-2785	NM_001438	3600	3607	98	ENSG00000196482	ESRRG
bta-miR-8-44984	NM_001491	240	247	98	ENSG00000111846	GCNT2
bta-miR-13-8622	NM_001511	109	116	98	ENSG00000163739	CXCL1
bta-miR-23-25909	NM_001616	66	73	97	ENSG00000121989	ACVR2A
bta-miR-26-29685	NM_001616	66	73	97	ENSG00000121989	ACVR2A
bta-miR-8-44984	NM_001656	1889	1895	98	ENSG00000113595	TRIM23
bta-miR-13-8186	NM_001677	1123	1130	99	ENSG00000143153	ATP1B1
bta-miR-23-25381	NM_001677	1123	1130	99	ENSG00000143153	ATP1B1
bta-miR-10-3364	NM_001677	1123	1130	99	ENSG00000143153	ATP1B1
bta-miR-23-25381	NM_001683	541	548	96	ENSG00000157087	ATP2B2
bta-miR-10-3364	NM_001683	541	548	96	ENSG00000157087	ATP2B2
bta-miR-13-8186	NM_001683	541	548	96	ENSG00000157087	ATP2B2
bta-miR-8-44984	NM_001716	163	170	95	ENSG00000160683	CXCR5
bta-miR-10-2785	NM_001717	146	153	96	ENSG00000169594	BNC1
bta-miR-23-25909	NM_001752	533	539	96	ENSG00000121691	CAT
bta-miR-26-29685	NM_001752	533	539	96	ENSG00000121691	CAT
bta-miR-2285v	NM_001754	241	248	95	ENSG00000159216	RUNX1
bta-miR-13-8622	NM_001763	283	290	98	ENSG00000158477	CD1A
bta-miR-23-25909	NM_001795	1433	1439	95	ENSG00000179776	CDH5
bta-miR-26-29685	NM_001795	1433	1439	95	ENSG00000179776	CDH5
bta-miR-13-8622	NM_001814	304	311	99	ENSG00000109861	CTSC
bta-miR-8-44984	NM_001841	256	263	95	ENSG00000188822	CNR2
bta-miR-9-46570	NM_001845	939	945	95	ENSG00000187498	COL4A1
bta-miR-X-48106	NM_001845	939	945	95	ENSG00000187498	COL4A1
bta-miR-26-29685	NM_001851	102	109	95	ENSG00000112280	COL9A1
bta-miR-13-8186	NM_001854	960	967	95	ENSG00000060718	COL11A1
bta-miR-23-25381	NM_001854	960	967	95	ENSG00000060718	COL11A1
bta-miR-10-3364	NM_001854	960	967	95	ENSG00000060718	COL11A1
bta-miR-23-25381	NM_001855	278	285	95	ENSG00000204291	COL15A1
bta-miR-13-8186	NM_001855	278	285	95	ENSG00000204291	COL15A1
bta-miR-17-14144	NM_001855	786	793	99	ENSG00000204291	COL15A1
bta-miR-10-3364	NM_001855	278	285	95	ENSG00000204291	COL15A1
bta-miR-10-2785	NM_001876	84	91	99	ENSG00000110090	CPT1A
bta-miR-10-2785	NM_001935	74	81	99	ENSG00000197635	DPP4
bta-miR-10-3364	NM_001938	1716	1723	99	ENSG00000117505	DR1
bta-miR-23-25381	NM_001938	1716	1723	99	ENSG00000117505	DR1
bta-miR-13-8186	NM_001938	1716	1723	99	ENSG00000117505	DR1
bta-miR-17-14144	NM_001980	1899	1906	99	ENSG00000111450	STX2
bta-miR-18-16340	NM_001995	1374	1380	97	ENSG00000151726	ACSL1
bta-miR-14-9195	NM_001995	1374	1380	97	ENSG00000151726	ACSL1
bta-miR-8-44984	NM_001999	20	27	99	ENSG00000138829	FBN2
bta-miR-2285v	NM_002027	377	384	99	ENSG00000168522	FNTA
bta-miR-8-44984	NM_002028	946	953	95	ENSG00000257365	FNTB
bta-miR-14-9195	NM_002051	918	924	95	ENSG00000107485	GATA3
bta-miR-18-16340	NM_002051	918	924	95	ENSG00000107485	GATA3
bta-miR-14-9195	NM_002063	1165	1171	95	ENSG00000101958	GLRA2
bta-miR-18-16340	NM_002063	1165	1171	95	ENSG00000101958	GLRA2
bta-miR-18-16340	NM_002067	48	54	95	ENSG00000088256	GNA11
bta-miR-14-9195	NM_002067	48	54	95	ENSG00000088256	GNA11
bta-miR-13-8622	NM_002089	109	116	98	ENSG00000081041	CXCL2
bta-miR-8-44984	NM_002098	34	41	97	ENSG00000112599	GUCA1B
bta-miR-10-3364	NM_002128	2012	2019	95	ENSG00000189403	HMGB1
bta-miR-23-25381	NM_002128	2012	2019	95	ENSG00000189403	HMGB1
bta-miR-13-8186	NM_002128	2012	2019	95	ENSG00000189403	HMGB1
bta-miR-X-48106	NM_002182	123	130	99	ENSG00000196083	IL1RAP
bta-miR-9-46570	NM_002182	123	130	99	ENSG00000196083	IL1RAP
bta-miR-2285v	NM_002222	1524	1531	97	ENSG00000150995	ITPR1
bta-miR-13-8622	NM_002241	77	84	97	ENSG00000177807	KCNJ10
bta-miR-23-25909	NM_002310	6143	6150	96	ENSG00000113594	LIFR
bta-miR-26-29685	NM_002310	6143	6150	96	ENSG00000113594	LIFR
bta-miR-8-44984	NM_002312	516	523	98	ENSG00000174405	LIG4
bta-miR-X-48106	NM_002353	162	169	98	ENSG00000184292	TACSTD2
bta-miR-9-46570	NM_002353	162	169	98	ENSG00000184292	TACSTD2
bta-miR-10-2785	NM_002364	332	339	97	ENSG00000099399	MAGEB2
bta-miR-10-3364	NM_002372	273	280	97	ENSG00000112893	MAN2A1
bta-miR-23-25381	NM_002372	273	280	97	ENSG00000112893	MAN2A1
bta-miR-13-8186	NM_002372	273	280	97	ENSG00000112893	MAN2A1
bta-miR-23-25381	NM_002374	410	417	97	ENSG00000078018	MAP2
bta-miR-13-8186	NM_002374	410	417	97	ENSG00000078018	MAP2
bta-miR-10-3364	NM_002374	410	417	97	ENSG00000078018	MAP2
bta-miR-26-29685	NM_002376	452	459	98	ENSG00000075413	MARK3
bta-miR-23-25909	NM_002376	452	459	98	ENSG00000075413	MARK3
bta-miR-8-44984	NM_002391	66	73	97	ENSG00000110492	MDK
bta-miR-17-14144	NM_002397	312	319	95	ENSG00000081189	MEF2C
bta-miR-26-29685	NM_002403	332	338	97	ENSG00000117122	MFAP2
bta-miR-23-25909	NM_002403	332	338	97	ENSG00000117122	MFAP2
bta-miR-17-14144	NM_002416	36	42	95	ENSG00000138755	CXCL9
bta-miR-23-25909	NM_002421	361	368	95	ENSG00000196611	MMP1
bta-miR-26-29685	NM_002421	361	368	95	ENSG00000196611	MMP1
bta-miR-9-46570	NM_002422	219	226	95	ENSG00000149968	MMP3
bta-miR-X-48106	NM_002422	219	226	95	ENSG00000149968	MMP3
bta-miR-9-46570	NM_002425	220	227	96	ENSG00000166670	MMP10
bta-miR-X-48106	NM_002425	220	227	96	ENSG00000166670	MMP10
bta-miR-9-46570	NM_002444	1935	1941	96	ENSG00000147065	MSN
bta-miR-X-48106	NM_002444	1935	1941	96	ENSG00000147065	MSN
bta-miR-10-2785	NM_002526	560	567	97	ENSG00000135318	NT5E
bta-miR-10-2785	NM_002545	5062	5069	99	ENSG00000183715	OPCML
bta-miR-9-46570	NM_002608	24	31	98	ENSG00000100311	PDGFB
bta-miR-X-48106	NM_002608	24	31	98	ENSG00000100311	PDGFB
bta-miR-14-9195	NM_002699	342	349	97	ENSG00000185668	POU3F1
bta-miR-18-16340	NM_002699	342	349	97	ENSG00000185668	POU3F1
bta-miR-23-25381	NM_002729	697	704	98	ENSG00000152804	HHEX
bta-miR-10-3364	NM_002729	697	704	98	ENSG00000152804	HHEX
bta-miR-13-8186	NM_002729	697	704	98	ENSG00000152804	HHEX
bta-miR-26-29685	NM_002742	55	62	98	ENSG00000184304	PRKD1
bta-miR-23-25909	NM_002742	55	62	98	ENSG00000184304	PRKD1
bta-miR-14-9195	NM_002766	71	77	95	ENSG00000161542	PRPSAP1
bta-miR-18-16340	NM_002766	71	77	95	ENSG00000161542	PRPSAP1
bta-miR-8-44984	NM_002776	1330	1337	95	ENSG00000129451	KLK10
bta-miR-10-2785	NM_002794	378	385	99	ENSG00000126067	PSMB2
bta-miR-8-44984	NM_002807	40	47	99	ENSG00000173692	PSMD1
bta-miR-17-14144	NM_002841	1286	1293	96	ENSG00000144724	PTPRG
bta-miR-17-14144	NM_002845	604	611	95	ENSG00000173482	PTPRM
bta-miR-X-48106	NM_002890	934	941	99	ENSG00000145715	RASA1
bta-miR-9-46570	NM_002890	934	941	99	ENSG00000145715	RASA1
bta-miR-26-29685	NM_002897	218	225	98	ENSG00000153250	RBMS1
bta-miR-23-25909	NM_002897	218	225	98	ENSG00000153250	RBMS1
bta-miR-2285v	NM_002897	2481	2488	99	ENSG00000153250	RBMS1
bta-miR-10-2785	NM_002906	344	351	98	ENSG00000137710	RDX
bta-miR-17-14144	NM_002913	855	862	96	ENSG00000035928	RFC1
bta-miR-8-44984	NM_002913	971	978	96	ENSG00000035928	RFC1
bta-miR-8-44984	NM_002922	153	160	97	ENSG00000090104	RGS1
bta-miR-26-29685	NM_002940	77	83	96	ENSG00000164163	ABCE1
bta-miR-23-25909	NM_002940	77	83	96	ENSG00000164163	ABCE1
bta-miR-8-44984	NM_002949	70	77	95	ENSG00000262814	MRPL12
bta-miR-X-48106	NM_002976	1484	1491	98	ENSG00000136546	SCN7A
bta-miR-9-46570	NM_002976	1484	1491	98	ENSG00000136546	SCN7A
bta-miR-9-46570	NM_002999	211	218	98	ENSG00000124145	SDC4
bta-miR-X-48106	NM_002999	211	218	98	ENSG00000124145	SDC4
bta-miR-8-44984	NM_002999	1531	1538	97	ENSG00000124145	SDC4
bta-miR-10-2785	NM_003009	313	320	98	ENSG00000178980	SEPW1
bta-miR-8-44984	NM_003028	2764	2771	95	ENSG00000107338	SHB
bta-miR-8-44984	NM_003032	620	627	97	ENSG00000073849	ST6GAL1
bta-miR-8-44984	NM_003038	283	290	97	ENSG00000115902	SLC1A4
bta-miR-23-25909	NM_003043	60	67	95	ENSG00000131389	SLC6A6
bta-miR-26-29685	NM_003043	60	67	95	ENSG00000131389	SLC6A6
bta-miR-2285v	NM_003055	353	360	96	ENSG00000187714	SLC18A3
bta-miR-10-2785	NM_003104	268	275	96	ENSG00000140263	SORD
bta-miR-26-29685	NM_003107	1595	1602	96	ENSG00000124766	SOX4
bta-miR-23-25909	NM_003107	1595	1602	96	ENSG00000124766	SOX4
bta-miR-13-8622	NM_003243	230	237	95	ENSG00000069702	TGFBR3
bta-miR-10-2785	NM_003253	1256	1263	95	ENSG00000156299	TIAM1
bta-miR-10-3364	NM_003262	4584	4591	95	ENSG00000008952	SEC62
bta-miR-23-25381	NM_003262	4584	4591	95	ENSG00000008952	SEC62
bta-miR-13-8186	NM_003262	4584	4591	95	ENSG00000008952	SEC62
bta-miR-26-29685	NM_003298	4987	4994	97	ENSG00000177463	NR2C2
bta-miR-23-25909	NM_003298	4987	4994	97	ENSG00000177463	NR2C2
bta-miR-9-46570	NM_003304	1503	1509	95	ENSG00000144935	TRPC1
bta-miR-X-48106	NM_003304	1503	1509	95	ENSG00000144935	TRPC1
bta-miR-13-8622	NM_003328	128	134	95	ENSG00000074966	TXK
bta-miR-9-46570	NM_003348	312	319	97	ENSG00000177889	UBE2N
bta-miR-X-48106	NM_003348	312	319	97	ENSG00000177889	UBE2N
bta-miR-13-8186	NM_003374	124	131	97	ENSG00000213585	VDAC1
bta-miR-10-3364	NM_003374	124	131	97	ENSG00000213585	VDAC1
bta-miR-23-25381	NM_003374	124	131	97	ENSG00000213585	VDAC1
bta-miR-10-2785	NM_003379	251	258	97	ENSG00000092820	EZR
bta-miR-26-29685	NM_003406	101	108	99	ENSG00000164924	YWHAZ
bta-miR-23-25909	NM_003406	101	108	99	ENSG00000164924	YWHAZ
bta-miR-23-25381	NM_003439	85	91	95	ENSG00000106261	ZKSCAN1
bta-miR-10-3364	NM_003439	85	91	95	ENSG00000106261	ZKSCAN1
bta-miR-13-8186	NM_003439	85	91	95	ENSG00000106261	ZKSCAN1
bta-miR-26-29685	NM_003453	77	84	98	ENSG00000121741	ZMYM2
bta-miR-23-25909	NM_003453	77	84	98	ENSG00000121741	ZMYM2
bta-miR-X-48106	NM_003462	1491	1498	97	ENSG00000163879	DNALI1
bta-miR-9-46570	NM_003462	1491	1498	97	ENSG00000163879	DNALI1
bta-miR-10-3364	NM_003506	207	214	96	ENSG00000164930	FZD6
bta-miR-23-25381	NM_003506	207	214	96	ENSG00000164930	FZD6
bta-miR-13-8186	NM_003506	207	214	96	ENSG00000164930	FZD6
bta-miR-10-2785	NM_003507	219	226	97	ENSG00000155760	FZD7
bta-miR-X-48106	NM_003580	237	244	95	ENSG00000035681	NSMAF
bta-miR-9-46570	NM_003580	237	244	95	ENSG00000035681	NSMAF
bta-miR-17-14144	NM_003601	109	116	98	ENSG00000153147	SMARCA5
bta-miR-17-14144	NM_003631	669	676	97	ENSG00000227345	PARG
bta-miR-17-14144	NM_003640	411	418	95	ENSG00000070061	IKBKAP
bta-miR-10-2785	NM_003659	598	605	96	ENSG00000018510	AGPS
bta-miR-18-16340	NM_003681	349	356	98	ENSG00000160209	PDXK
bta-miR-14-9195	NM_003681	349	356	98	ENSG00000160209	PDXK
bta-miR-18-16340	NM_003684	599	605	96	ENSG00000079277	MKNK1
bta-miR-14-9195	NM_003684	599	605	96	ENSG00000079277	MKNK1
bta-miR-8-44984	NM_003747	231	238	99	ENSG00000173273	TNKS
bta-miR-8-44984	NM_003747	400	407	99	ENSG00000173273	TNKS
bta-miR-8-44984	NM_003783	680	687	97	ENSG00000162630	B3GALT2
bta-miR-9-46570	NM_003799	439	446	99	ENSG00000101654	RNMT
bta-miR-X-48106	NM_003799	439	446	99	ENSG00000101654	RNMT
bta-miR-8-44984	NM_003830	146	153	99	ENSG00000105501	SIGLEC5
bta-miR-18-16340	NM_003870	1921	1927	95	ENSG00000140575	IQGAP1
bta-miR-14-9195	NM_003870	1921	1927	95	ENSG00000140575	IQGAP1
bta-miR-13-8622	NM_003877	396	403	96	ENSG00000120833	SOCS2
bta-miR-13-8622	NM_003889	915	922	98	ENSG00000144852	NR1I2
bta-miR-14-9195	NM_003904	42	49	99	ENSG00000109917	ZPR1
bta-miR-18-16340	NM_003904	42	49	99	ENSG00000109917	ZPR1
bta-miR-26-29685	NM_003908	52	59	95	ENSG00000125977	EIF2S2
bta-miR-23-25909	NM_003908	52	59	95	ENSG00000125977	EIF2S2
bta-miR-10-2785	NM_003939	72	79	96	ENSG00000166167	BTRC
bta-miR-8-44984	NM_003965	252	259	99	ENSG00000121797	CCRL2
bta-miR-9-46570	NM_003971	3122	3129	99	ENSG00000008294	SPAG9
bta-miR-X-48106	NM_003971	3122	3129	99	ENSG00000008294	SPAG9
bta-miR-13-8622	NM_003984	388	395	98	ENSG00000007216	SLC13A2
bta-miR-26-29685	NM_003994	4278	4284	95	ENSG00000049130	KITLG
bta-miR-23-25909	NM_003994	4278	4284	95	ENSG00000049130	KITLG
bta-miR-13-8622	NM_003999	201	208	97	ENSG00000145623	OSMR
bta-miR-17-14144	NM_004041	5759	5766	95	ENSG00000137486	ARRB1
bta-miR-9-46570	NM_004060	896	903	97	ENSG00000113328	CCNG1
bta-miR-X-48106	NM_004060	896	903	97	ENSG00000113328	CCNG1
bta-miR-8-44984	NM_004072	2876	2883	97	ENSG00000174600	CMKLR1
bta-miR-8-44984	NM_004111	216	223	99	ENSG00000168496	FEN1
bta-miR-8-44984	NM_004114	605	612	95	ENSG00000129682	FGF13
bta-miR-10-2785	NM_004136	2505	2512	95	ENSG00000136381	IREB2
bta-miR-8-44984	NM_004145	881	888	96	ENSG00000099331	MYO9B
bta-miR-26-29685	NM_004161	334	341	96	ENSG00000138069	RAB1A
bta-miR-23-25909	NM_004161	334	341	96	ENSG00000138069	RAB1A
bta-miR-8-44984	NM_004188	66	73	95	ENSG00000165702	GFI1B
bta-miR-10-2785	NM_004239	1159	1165	95	ENSG00000100815	TRIP11
bta-miR-26-29685	NM_004280	288	295	99	ENSG00000124802	EEF1E1
bta-miR-23-25909	NM_004280	288	295	99	ENSG00000124802	EEF1E1
bta-miR-10-2785	NM_004313	387	394	97	ENSG00000141480	ARRB2
bta-miR-23-25381	NM_004354	2790	2797	99	ENSG00000138764	CCNG2
bta-miR-13-8186	NM_004354	2790	2797	99	ENSG00000138764	CCNG2
bta-miR-10-3364	NM_004354	2790	2797	99	ENSG00000138764	CCNG2
bta-miR-10-3364	NM_004384	2231	2238	96	ENSG00000151292	CSNK1G3
bta-miR-23-25381	NM_004384	2231	2238	96	ENSG00000151292	CSNK1G3
bta-miR-13-8186	NM_004384	2231	2238	96	ENSG00000151292	CSNK1G3
bta-miR-18-16340	NM_004421	418	425	98	ENSG00000107404	DVL1
bta-miR-14-9195	NM_004421	418	425	98	ENSG00000107404	DVL1
bta-miR-14-9195	NM_004436	293	300	98	ENSG00000143420	ENSA
bta-miR-18-16340	NM_004436	293	300	98	ENSG00000143420	ENSA
bta-miR-8-44984	NM_004459	1628	1635	98	ENSG00000171634	BPTF
bta-miR-10-2785	NM_004466	386	393	96	ENSG00000179399	GPC5
bta-miR-13-8622	NM_004473	1094	1101	97	ENSG00000178919	FOXE1
bta-miR-2285v	NM_004480	525	532	97	ENSG00000033170	FUT8
bta-miR-26-29685	NM_004498	83	90	98	ENSG00000169856	ONECUT1
bta-miR-23-25909	NM_004498	83	90	98	ENSG00000169856	ONECUT1
bta-miR-10-3364	NM_004508	905	912	99	ENSG00000067064	IDI1
bta-miR-13-8186	NM_004508	905	912	99	ENSG00000067064	IDI1
bta-miR-23-25381	NM_004508	905	912	99	ENSG00000067064	IDI1
bta-miR-26-29685	NM_004538	46	53	99	ENSG00000186310	NAP1L3
bta-miR-23-25909	NM_004538	46	53	99	ENSG00000186310	NAP1L3
bta-miR-9-46570	NM_004540	1748	1755	95	ENSG00000154654	NCAM2
bta-miR-10-3364	NM_004540	443	450	97	ENSG00000154654	NCAM2
bta-miR-23-25381	NM_004540	443	450	97	ENSG00000154654	NCAM2
bta-miR-X-48106	NM_004540	1748	1755	95	ENSG00000154654	NCAM2
bta-miR-13-8186	NM_004540	443	450	97	ENSG00000154654	NCAM2
bta-miR-8-44984	NM_004549	283	290	97	ENSG00000151366	NDUFC2
bta-miR-9-46570	NM_004569	484	491	99	ENSG00000100564	PIGH
bta-miR-X-48106	NM_004569	484	491	99	ENSG00000100564	PIGH
bta-miR-8-44984	NM_004572	178	185	99	ENSG00000057294	PKP2
bta-miR-13-8186	NM_004577	28	35	99	ENSG00000146733	PSPH
bta-miR-23-25381	NM_004577	28	35	99	ENSG00000146733	PSPH
bta-miR-10-3364	NM_004577	28	35	99	ENSG00000146733	PSPH
bta-miR-13-8622	NM_004580	1966	1972	95	ENSG00000069974	RAB27A
bta-miR-17-14144	NM_004614	2926	2933	96	ENSG00000166548	TK2
bta-miR-10-2785	NM_004617	442	449	99	ENSG00000169903	TM4SF4
bta-miR-17-14144	NM_004617	256	263	98	ENSG00000169903	TM4SF4
bta-miR-13-8186	NM_004621	184	191	99	ENSG00000137672	TRPC6
bta-miR-23-25381	NM_004621	184	191	99	ENSG00000137672	TRPC6
bta-miR-10-3364	NM_004621	184	191	99	ENSG00000137672	TRPC6
bta-miR-8-44984	NM_004637	380	387	95	ENSG00000075785	RAB7A
bta-miR-13-8622	NM_004645	193	200	99	ENSG00000121058	COIL
bta-miR-13-8622	NM_004651	107	114	97	ENSG00000102226	USP11
bta-miR-10-2785	NM_004687	287	294	96	ENSG00000108389	MTMR4
bta-miR-8-44984	NM_004718	276	283	97	ENSG00000115944	COX7A2L
bta-miR-13-8622	NM_004723	375	382	97	ENSG00000116584	ARHGEF2
bta-miR-X-48106	NM_004741	1059	1066	97	ENSG00000166197	NOLC1
bta-miR-9-46570	NM_004741	1059	1066	97	ENSG00000166197	NOLC1
bta-miR-8-44984	NM_004753	17	24	99	ENSG00000162496	DHRS3
bta-miR-X-48106	NM_004762	1687	1693	97	ENSG00000108669	CYTH1
bta-miR-9-46570	NM_004762	1687	1693	97	ENSG00000108669	CYTH1
bta-miR-8-44984	NM_004808	1933	1940	98	ENSG00000152465	NMT2
bta-miR-26-29685	NM_004871	2739	2746	98	ENSG00000108587	GOSR1
bta-miR-23-25909	NM_004871	2739	2746	98	ENSG00000108587	GOSR1
bta-miR-10-3364	NM_004896	60	67	95	ENSG00000122958	VPS26A
bta-miR-23-25381	NM_004896	60	67	95	ENSG00000122958	VPS26A
bta-miR-13-8186	NM_004896	60	67	95	ENSG00000122958	VPS26A
bta-miR-26-29685	NM_004901	489	496	98	ENSG00000197217	ENTPD4
bta-miR-23-25909	NM_004901	489	496	98	ENSG00000197217	ENTPD4
bta-miR-24-26839	NM_004918	492	499	98	ENSG00000213231	TCL1B
bta-miR-17-14144	NM_005042	327	334	96	ENSG00000272803	PRH2
bta-miR-17-14144	NM_005042	327	334	96	ENSG00000275679	PRH2
bta-miR-17-14144	NM_005042	327	334	96	ENSG00000134551	PRH2
bta-miR-17-14144	NM_005048	25	32	97	ENSG00000144407	PTH2R
bta-miR-X-48106	NM_005068	165	172	99	ENSG00000112246	SIM1
bta-miR-9-46570	NM_005068	165	172	99	ENSG00000112246	SIM1
bta-miR-13-8622	NM_005104	295	302	95	ENSG00000204256	BRD2
bta-miR-13-8622	NM_005104	295	302	95	ENSG00000235307	BRD2
bta-miR-13-8622	NM_005104	295	302	95	ENSG00000234704	BRD2
bta-miR-13-8622	NM_005104	295	302	95	ENSG00000230678	BRD2
bta-miR-13-8622	NM_005104	295	302	95	ENSG00000234507	BRD2
bta-miR-13-8622	NM_005104	295	302	95	ENSG00000215077	BRD2
bta-miR-13-8622	NM_005104	295	302	95	ENSG00000236227	BRD2
bta-miR-8-44984	NM_005105	3225	3232	97	ENSG00000265241	RBM8A
bta-miR-17-14144	NM_005158	150	157	99	ENSG00000143322	ABL2
bta-miR-10-2785	NM_005159	31	38	99	ENSG00000159251	ACTC1
bta-miR-23-25909	NM_005259	596	603	95	ENSG00000138379	MSTN
bta-miR-8-44984	NM_005272	32	38	95	ENSG00000134183	GNAT2
bta-miR-10-2785	NM_005324	129	136	99	ENSG00000132475	H3F3B
bta-miR-23-25909	NM_005333	1284	1290	96	ENSG00000004961	HCCS
bta-miR-26-29685	NM_005333	1284	1290	96	ENSG00000004961	HCCS
bta-miR-14-9195	NM_005334	773	780	95	ENSG00000172534	HCFC1
bta-miR-18-16340	NM_005334	773	780	95	ENSG00000172534	HCFC1
bta-miR-8-44984	NM_005336	1108	1115	95	ENSG00000115677	HDLBP
bta-miR-26-29685	NM_005367	170	177	98	ENSG00000213401	MAGEA12
bta-miR-23-25909	NM_005367	170	177	98	ENSG00000213401	MAGEA12
bta-miR-10-3364	NM_005369	110	117	98	ENSG00000101977	MCF2
bta-miR-23-25381	NM_005369	110	117	98	ENSG00000101977	MCF2
bta-miR-13-8186	NM_005369	110	117	98	ENSG00000101977	MCF2
bta-miR-2285v	NM_005376	1074	1081	99	ENSG00000116990	MYCL
bta-miR-13-8622	NM_005397	3267	3274	96	ENSG00000128567	PODXL
bta-miR-X-48106	NM_005406	112	119	99	ENSG00000067900	ROCK1
bta-miR-9-46570	NM_005406	112	119	99	ENSG00000067900	ROCK1
bta-miR-X-48106	NM_005414	35	41	96	ENSG00000136603	SKIL
bta-miR-9-46570	NM_005414	35	41	96	ENSG00000136603	SKIL
bta-miR-17-14144	NM_005420	98	105	99	ENSG00000109193	SULT1E1
bta-miR-10-2785	NM_005439	202	209	97	ENSG00000089693	MLF2
bta-miR-23-25909	NM_005477	56	63	99	ENSG00000138622	HCN4
bta-miR-26-29685	NM_005477	56	63	99	ENSG00000138622	HCN4
bta-miR-26-29685	NM_005486	541	548	97	ENSG00000141198	TOM1L1
bta-miR-23-25909	NM_005486	541	548	97	ENSG00000141198	TOM1L1
bta-miR-17-14144	NM_005489	109	116	95	ENSG00000095370	SH2D3C
bta-miR-10-2785	NM_005494	369	376	96	ENSG00000105993	DNAJB6
bta-miR-13-8186	NM_005499	594	600	95	ENSG00000126261	UBA2
bta-miR-23-25381	NM_005499	594	600	95	ENSG00000126261	UBA2
bta-miR-10-3364	NM_005499	594	600	95	ENSG00000126261	UBA2
bta-miR-13-8622	NM_005506	2316	2323	95	ENSG00000138760	SCARB2
bta-miR-23-25909	NM_005511	439	446	97	ENSG00000120215	MLANA
bta-miR-26-29685	NM_005511	439	446	97	ENSG00000120215	MLANA
bta-miR-18-16340	NM_005529	269	276	97	ENSG00000142798	HSPG2
bta-miR-14-9195	NM_005529	269	276	97	ENSG00000142798	HSPG2
bta-miR-17-14144	NM_005559	102	109	98	ENSG00000101680	LAMA1
bta-miR-8-44984	NM_005562	47	54	98	ENSG00000058085	LAMC2
bta-miR-24-26839	NM_005589	140	147	96	ENSG00000119711	ALDH6A1
bta-miR-9-46570	NM_005599	1468	1474	96	ENSG00000177551	NHLH2
bta-miR-X-48106	NM_005599	1468	1474	96	ENSG00000177551	NHLH2
bta-miR-8-44984	NM_005600	116	123	98	ENSG00000158793	NIT1
bta-miR-8-44984	NM_005625	291	298	95	ENSG00000137575	SDCBP
bta-miR-13-8622	NM_005627	873	880	99	ENSG00000118515	SGK1
bta-miR-13-8622	NM_005645	124	130	98	ENSG00000197780	TAF13
bta-miR-8-44984	NM_005678	49	55	96	ENSG00000273173	SNURF
bta-miR-9-46570	NM_005708	475	482	98	ENSG00000183098	GPC6
bta-miR-X-48106	NM_005708	475	482	98	ENSG00000183098	GPC6
bta-miR-26-29685	NM_005722	2308	2314	95	ENSG00000138071	ACTR2
bta-miR-23-25909	NM_005722	2308	2314	95	ENSG00000138071	ACTR2
bta-miR-8-44984	NM_005729	928	935	99	ENSG00000108179	PPIF
bta-miR-17-14144	NM_005754	868	875	97	ENSG00000145907	G3BP1
bta-miR-23-25381	NM_005759	286	293	96	ENSG00000138443	ABI2
bta-miR-13-8186	NM_005759	286	293	96	ENSG00000138443	ABI2
bta-miR-10-3364	NM_005759	286	293	96	ENSG00000138443	ABI2
bta-miR-10-3364	NM_005802	462	469	97	ENSG00000197579	TOPORS
bta-miR-23-25381	NM_005802	462	469	97	ENSG00000197579	TOPORS
bta-miR-13-8186	NM_005802	462	469	97	ENSG00000197579	TOPORS
bta-miR-10-2785	NM_005808	384	391	97	ENSG00000144677	CTDSPL
bta-miR-X-48106	NM_005843	2228	2235	97	ENSG00000115145	STAM2
bta-miR-9-46570	NM_005843	2228	2235	97	ENSG00000115145	STAM2
bta-miR-26-29685	NM_005852	1109	1116	99	ENSG00000170004	CHD3
bta-miR-23-25909	NM_005852	1109	1116	99	ENSG00000170004	CHD3
bta-miR-8-44984	NM_005877	2178	2185	99	ENSG00000099995	SF3A1
bta-miR-8-44984	NM_005894	96	103	97	ENSG00000073754	CD5L
bta-miR-26-29685	NM_005900	391	398	95	ENSG00000170365	SMAD1
bta-miR-23-25909	NM_005900	391	398	95	ENSG00000170365	SMAD1
bta-miR-13-8186	NM_005943	2440	2447	96	ENSG00000124615	MOCS1
bta-miR-23-25381	NM_005943	2440	2447	96	ENSG00000124615	MOCS1
bta-miR-10-3364	NM_005943	2440	2447	96	ENSG00000124615	MOCS1
bta-miR-17-14144	NM_005955	4989	4996	97	ENSG00000188786	MTF1
bta-miR-10-2785	NM_005977	81	88	99	ENSG00000127870	RNF6
bta-miR-2285v	NM_006093	36	43	97	ENSG00000156575	PRG3
bta-miR-26-29685	NM_006135	116	122	96	ENSG00000116489	CAPZA1
bta-miR-23-25909	NM_006135	116	122	96	ENSG00000116489	CAPZA1
bta-miR-18-16340	NM_006206	1790	1797	95	ENSG00000134853	PDGFRA
bta-miR-14-9195	NM_006206	1790	1797	95	ENSG00000134853	PDGFRA
bta-miR-13-8622	NM_006209	21	28	97	ENSG00000136960	ENPP2
bta-miR-18-16340	NM_006227	114	120	96	ENSG00000100979	PLTP
bta-miR-14-9195	NM_006227	114	120	96	ENSG00000100979	PLTP
bta-miR-8-44984	NM_006251	251	258	99	ENSG00000132356	PRKAA1
bta-miR-17-14144	NM_006255	262	269	95	ENSG00000027075	PRKCH
bta-miR-26-29685	NM_006265	1398	1405	99	ENSG00000164754	RAD21
bta-miR-23-25909	NM_006265	1398	1405	99	ENSG00000164754	RAD21
bta-miR-23-25381	NM_006287	2207	2213	95	ENSG00000003436	TFPI
bta-miR-13-8186	NM_006287	2207	2213	95	ENSG00000003436	TFPI
bta-miR-10-3364	NM_006287	2207	2213	95	ENSG00000003436	TFPI
bta-miR-10-2785	NM_006294	906	913	98	ENSG00000156467	UQCRB
bta-miR-8-44984	NM_006319	89	96	95	ENSG00000103502	CDIPT
bta-miR-23-25909	NM_006375	637	644	95	ENSG00000165675	ENOX2
bta-miR-26-29685	NM_006375	637	644	95	ENSG00000165675	ENOX2
bta-miR-X-48106	NM_006399	285	292	98	ENSG00000156127	BATF
bta-miR-9-46570	NM_006399	285	292	98	ENSG00000156127	BATF
bta-miR-13-8622	NM_006469	26	33	99	ENSG00000116679	IVNS1ABP
bta-miR-8-44984	NM_006516	1205	1212	98	ENSG00000117394	SLC2A1
bta-miR-10-2785	NM_006521	995	1002	95	ENSG00000068323	TFE3
bta-miR-10-2785	NM_006521	53	60	95	ENSG00000068323	TFE3
bta-miR-2285v	NM_006522	159	166	96	ENSG00000115596	WNT6
bta-miR-13-8622	NM_006557	1673	1679	96	ENSG00000173253	DMRT2
bta-miR-23-25381	NM_006614	447	454	96	ENSG00000134121	CHL1
bta-miR-13-8186	NM_006614	447	454	96	ENSG00000134121	CHL1
bta-miR-10-3364	NM_006614	447	454	96	ENSG00000134121	CHL1
bta-miR-2285v	NM_006648	63	70	98	ENSG00000165238	WNK2
bta-miR-8-44984	NM_006654	698	705	97	ENSG00000166225	FRS2
bta-miR-10-2785	NM_006663	29	36	98	ENSG00000104881	PPP1R13L
bta-miR-13-8622	NM_006691	28	35	98	ENSG00000133800	LYVE1
bta-miR-10-3364	NM_006699	2506	2513	97	ENSG00000198162	MAN1A2
bta-miR-23-25381	NM_006699	2506	2513	97	ENSG00000198162	MAN1A2
bta-miR-13-8186	NM_006699	2506	2513	97	ENSG00000198162	MAN1A2
bta-miR-13-8186	NM_006710	870	877	98	ENSG00000198612	COPS8
bta-miR-23-25381	NM_006710	870	877	98	ENSG00000198612	COPS8
bta-miR-10-3364	NM_006710	870	877	98	ENSG00000198612	COPS8
bta-miR-17-14144	NM_006721	525	532	98	ENSG00000156110	ADK
bta-miR-13-8622	NM_006750	375	382	97	ENSG00000260873	SNTB2
bta-miR-13-8622	NM_006750	375	382	97	ENSG00000168807	SNTB2
bta-miR-8-44984	NM_006769	638	645	98	ENSG00000143013	LMO4
bta-miR-17-14144	NM_006770	107	114	97	ENSG00000019169	MARCO
bta-miR-17-14144	NM_006777	81	88	99	ENSG00000177485	ZBTB33
bta-miR-14-9195	NM_006803	268	275	99	ENSG00000070718	AP3M2
bta-miR-18-16340	NM_006803	268	275	99	ENSG00000070718	AP3M2
bta-miR-26-29685	NM_006811	121	128	97	ENSG00000132824	SERINC3
bta-miR-23-25909	NM_006811	121	128	97	ENSG00000132824	SERINC3
bta-miR-17-14144	NM_006815	1354	1361	96	ENSG00000086598	TMED2
bta-miR-8-44984	NM_006887	1291	1298	96	ENSG00000152518	ZFP36L2
bta-miR-23-25381	NM_006909	309	316	96	ENSG00000113319	RASGRF2
bta-miR-13-8186	NM_006909	309	316	96	ENSG00000113319	RASGRF2
bta-miR-10-3364	NM_006909	309	316	96	ENSG00000113319	RASGRF2
bta-miR-X-48106	NM_006912	742	749	96	ENSG00000143622	RIT1
bta-miR-9-46570	NM_006912	742	749	96	ENSG00000143622	RIT1
bta-miR-17-14144	NM_006924	3936	3943	99	ENSG00000136450	SRSF1
bta-miR-14-9195	NM_006940	443	449	96	ENSG00000134532	SOX5
bta-miR-18-16340	NM_006940	443	449	96	ENSG00000134532	SOX5
bta-miR-17-14144	NM_006951	829	836	99	ENSG00000148835	TAF5
bta-miR-10-2785	NM_007023	360	367	98	ENSG00000091428	RAPGEF4
bta-miR-23-25909	NM_007039	1797	1804	98	ENSG00000070778	PTPN21
bta-miR-26-29685	NM_007039	1797	1804	98	ENSG00000070778	PTPN21
bta-miR-17-14144	NM_007049	972	979	98	ENSG00000112763	BTN2A1
bta-miR-10-2785	NM_007049	798	805	95	ENSG00000112763	BTN2A1
bta-miR-23-25909	NM_007064	1500	1507	99	ENSG00000160145	KALRN
bta-miR-26-29685	NM_007064	1500	1507	99	ENSG00000160145	KALRN
bta-miR-24-26839	NM_007067	847	854	95	ENSG00000136504	KAT7
bta-miR-10-2785	NM_007085	36	43	98	ENSG00000163430	FSTL1
bta-miR-8-44984	NM_007137	122	128	95	ENSG00000197779	ZNF81
bta-miR-13-8622	NM_007174	2176	2182	96	ENSG00000122966	CIT
bta-miR-X-48106	NM_007190	512	519	96	ENSG00000107651	SEC23IP
bta-miR-9-46570	NM_007190	512	519	96	ENSG00000107651	SEC23IP
bta-miR-10-3364	NM_007191	247	254	99	ENSG00000156076	WIF1
bta-miR-13-8186	NM_007191	247	254	99	ENSG00000156076	WIF1
bta-miR-23-25381	NM_007191	247	254	99	ENSG00000156076	WIF1
bta-miR-8-44984	NM_007198	783	790	97	ENSG00000147471	PROSC
bta-miR-23-25381	NM_007199	4836	4843	97	ENSG00000090376	IRAK3
bta-miR-13-8186	NM_007199	4836	4843	97	ENSG00000090376	IRAK3
bta-miR-10-3364	NM_007199	4836	4843	97	ENSG00000090376	IRAK3
bta-miR-13-8622	NM_007257	1424	1431	95	ENSG00000240694	PNMA2
bta-miR-17-14144	NM_007266	490	497	98	ENSG00000198522	GPN1
bta-miR-8-44984	NM_007275	50	57	96	ENSG00000114383	TUSC2
bta-miR-23-25381	NM_007282	118	125	99	ENSG00000082996	RNF13
bta-miR-13-8186	NM_007282	118	125	99	ENSG00000082996	RNF13
bta-miR-10-3364	NM_007282	118	125	99	ENSG00000082996	RNF13
bta-miR-26-29685	NM_007308	1619	1626	97	ENSG00000145335	SNCA
bta-miR-23-25909	NM_007308	1619	1626	97	ENSG00000145335	SNCA
bta-miR-17-14144	NM_007314	150	157	99	ENSG00000143322	ABL2
bta-miR-26-29685	NM_012089	227	233	96	ENSG00000135776	ABCB10
bta-miR-23-25909	NM_012089	227	233	96	ENSG00000135776	ABCB10
bta-miR-X-48106	NM_012104	4015	4022	99	ENSG00000186318	BACE1
bta-miR-9-46570	NM_012104	4015	4022	99	ENSG00000186318	BACE1
bta-miR-9-46570	NM_012128	38	44	95	ENSG00000016602	CLCA4
bta-miR-X-48106	NM_012128	38	44	95	ENSG00000016602	CLCA4
bta-miR-13-8622	NM_012130	62	69	95	ENSG00000159261	CLDN14
bta-miR-26-29685	NM_012153	3746	3752	97	ENSG00000135373	EHF
bta-miR-23-25909	NM_012153	3746	3752	97	ENSG00000135373	EHF
bta-miR-26-29685	NM_012192	1325	1332	98	ENSG00000132286	TIMM10B
bta-miR-23-25909	NM_012192	1325	1332	98	ENSG00000132286	TIMM10B
bta-miR-8-44984	NM_012205	274	281	96	ENSG00000162882	HAAO
bta-miR-14-9195	NM_012215	1493	1500	98	ENSG00000198408	MGEA5
bta-miR-18-16340	NM_012215	1493	1500	98	ENSG00000198408	MGEA5
bta-miR-10-2785	NM_012241	584	591	95	ENSG00000124523	SIRT5
bta-miR-18-16340	NM_012243	878	884	95	ENSG00000117620	SLC35A3
bta-miR-14-9195	NM_012243	878	884	95	ENSG00000117620	SLC35A3
bta-miR-10-2785	NM_012250	1127	1134	98	ENSG00000133818	RRAS2
bta-miR-X-48106	NM_012325	1595	1601	95	ENSG00000101367	MAPRE1
bta-miR-9-46570	NM_012325	1595	1601	95	ENSG00000101367	MAPRE1
bta-miR-X-48106	NM_012342	236	243	97	ENSG00000095739	BAMBI
bta-miR-9-46570	NM_012342	236	243	97	ENSG00000095739	BAMBI
bta-miR-26-29685	NM_012345	1692	1699	98	ENSG00000083635	NUFIP1
bta-miR-23-25909	NM_012345	1692	1699	98	ENSG00000083635	NUFIP1
bta-miR-17-14144	NM_012347	816	823	96	ENSG00000112146	FBXO9
bta-miR-17-14144	NM_012347	1036	1043	96	ENSG00000112146	FBXO9
bta-miR-26-29685	NM_012383	303	309	96	ENSG00000134996	OSTF1
bta-miR-23-25909	NM_012383	303	309	96	ENSG00000134996	OSTF1
bta-miR-26-29685	NM_012397	55	62	98	ENSG00000197641	SERPINB13
bta-miR-23-25909	NM_012397	55	62	98	ENSG00000197641	SERPINB13
bta-miR-X-48106	NM_012402	1824	1831	98	ENSG00000132254	ARFIP2
bta-miR-9-46570	NM_012402	1824	1831	98	ENSG00000132254	ARFIP2
bta-miR-13-8622	NM_012416	419	426	96	ENSG00000137040	RANBP6
bta-miR-10-2785	NM_013283	276	283	95	ENSG00000038274	MAT2B
bta-miR-2285v	NM_013318	4011	4018	98	ENSG00000130723	PRRC2B
bta-miR-10-2785	NM_013339	1295	1301	96	ENSG00000088035	ALG6
bta-miR-17-14144	NM_013354	188	195	99	ENSG00000198791	CNOT7
bta-miR-13-8622	NM_013374	2956	2962	97	ENSG00000170248	PDCD6IP
bta-miR-17-14144	NM_013374	606	613	98	ENSG00000170248	PDCD6IP
bta-miR-10-2785	NM_013402	2011	2018	97	ENSG00000149485	FADS1
bta-miR-13-8622	NM_014016	404	411	97	ENSG00000211456	SACM1L
bta-miR-23-25909	NM_014035	1293	1300	98	ENSG00000064652	SNX24
bta-miR-26-29685	NM_014035	1293	1300	98	ENSG00000064652	SNX24
bta-miR-10-2785	NM_014078	56	63	95	ENSG00000172172	MRPL13
bta-miR-26-29685	NM_014165	62	69	99	ENSG00000123545	NDUFAF4
bta-miR-23-25909	NM_014165	62	69	99	ENSG00000123545	NDUFAF4
bta-miR-10-2785	NM_014181	2397	2404	95	ENSG00000119862	LGALSL
bta-miR-8-44984	NM_014217	1802	1808	95	ENSG00000082482	KCNK2
bta-miR-13-8622	NM_014236	235	241	95	ENSG00000116906	GNPAT
bta-miR-X-48106	NM_014252	56	62	95	ENSG00000102743	SLC25A15
bta-miR-9-46570	NM_014252	56	62	95	ENSG00000102743	SLC25A15
bta-miR-17-14144	NM_014253	4441	4448	96	ENSG00000009694	TENM1
bta-miR-8-44984	NM_014325	2094	2101	97	ENSG00000110880	CORO1C
bta-miR-10-2785	NM_014326	363	370	95	ENSG00000035664	DAPK2
bta-miR-13-8622	NM_014329	47	54	97	ENSG00000038358	EDC4
bta-miR-8-44984	NM_014345	696	703	97	ENSG00000171467	ZNF318
bta-miR-8-44984	NM_014358	352	358	95	ENSG00000166523	CLEC4E
bta-miR-23-25381	NM_014402	404	411	95	ENSG00000164405	UQCRQ
bta-miR-10-3364	NM_014402	404	411	95	ENSG00000164405	UQCRQ
bta-miR-13-8186	NM_014402	404	411	95	ENSG00000164405	UQCRQ
bta-miR-10-2785	NM_014445	2439	2445	96	ENSG00000120742	SERP1
bta-miR-13-8622	NM_014454	937	943	95	ENSG00000080546	SESN1
bta-miR-26-29685	NM_014456	69	75	95	ENSG00000150593	PDCD4
bta-miR-23-25909	NM_014456	69	75	95	ENSG00000150593	PDCD4
bta-miR-10-2785	NM_014456	1332	1339	99	ENSG00000150593	PDCD4
bta-miR-10-2785	NM_014471	58	65	97	ENSG00000122711	SPINK4
bta-miR-8-44984	NM_014489	749	756	96	ENSG00000148985	PGAP2
bta-miR-10-2785	NM_014495	583	590	98	ENSG00000132855	ANGPTL3
bta-miR-13-8186	NM_014517	1712	1719	99	ENSG00000153560	UBP1
bta-miR-23-25381	NM_014517	1712	1719	99	ENSG00000153560	UBP1
bta-miR-10-3364	NM_014517	1712	1719	99	ENSG00000153560	UBP1
bta-miR-8-44984	NM_014574	156	163	99	ENSG00000196792	STRN3
bta-miR-23-25909	NM_014614	79	86	97	ENSG00000068878	PSME4
bta-miR-26-29685	NM_014614	79	86	97	ENSG00000068878	PSME4
bta-miR-8-44984	NM_014631	7005	7012	98	ENSG00000107957	SH3PXD2A
bta-miR-8-44984	NM_014641	211	218	97	ENSG00000228575	MDC1
bta-miR-8-44984	NM_014641	211	218	97	ENSG00000206481	MDC1
bta-miR-8-44984	NM_014641	211	218	97	ENSG00000137337	MDC1
bta-miR-8-44984	NM_014641	211	218	97	ENSG00000225589	MDC1
bta-miR-8-44984	NM_014641	211	218	97	ENSG00000231135	MDC1
bta-miR-8-44984	NM_014641	211	218	97	ENSG00000224587	MDC1
bta-miR-8-44984	NM_014641	211	218	97	ENSG00000234012	MDC1
bta-miR-8-44984	NM_014641	211	218	97	ENSG00000237095	MDC1
bta-miR-13-8186	NM_014715	3694	3701	99	ENSG00000134909	ARHGAP32
bta-miR-10-3364	NM_014715	3694	3701	99	ENSG00000134909	ARHGAP32
bta-miR-23-25381	NM_014715	3694	3701	99	ENSG00000134909	ARHGAP32
bta-miR-10-2785	NM_014720	1788	1795	99	ENSG00000065613	SLK
bta-miR-8-44984	NM_014773	359	366	98	ENSG00000081791	KIAA0141
bta-miR-10-2785	NM_014783	86	93	99	ENSG00000282168	ARHGAP11A
bta-miR-10-2785	NM_014783	86	93	99	ENSG00000198826	ARHGAP11A
bta-miR-10-2785	NM_014783	86	93	99	ENSG00000275568	ARHGAP11A
bta-miR-23-25381	NM_014786	1578	1585	99	ENSG00000110237	ARHGEF17
bta-miR-10-3364	NM_014786	1578	1585	99	ENSG00000110237	ARHGEF17
bta-miR-13-8186	NM_014786	1578	1585	99	ENSG00000110237	ARHGEF17
bta-miR-8-44984	NM_014806	43	50	95	ENSG00000198853	RUSC2
bta-miR-X-48106	NM_014825	178	185	95	ENSG00000142207	URB1
bta-miR-9-46570	NM_014825	178	185	95	ENSG00000142207	URB1
bta-miR-8-44984	NM_014831	1060	1067	96	ENSG00000168016	TRANK1
bta-miR-13-8622	NM_014860	720	726	95	ENSG00000119760	SUPT7L
bta-miR-13-8622	NM_014860	2496	2503	98	ENSG00000119760	SUPT7L
bta-miR-24-26839	NM_014862	3464	3471	97	ENSG00000172379	ARNT2
bta-miR-2285v	NM_014962	2875	2882	99	ENSG00000132640	BTBD3
bta-miR-13-8622	NM_014969	660	667	98	ENSG00000085433	WDR47
bta-miR-23-25381	NM_014970	142	149	95	ENSG00000075945	KIFAP3
bta-miR-13-8186	NM_014970	142	149	95	ENSG00000075945	KIFAP3
bta-miR-10-3364	NM_014970	142	149	95	ENSG00000075945	KIFAP3
bta-miR-13-8622	NM_014988	281	288	98	ENSG00000064042	LIMCH1
bta-miR-10-2785	NM_014996	770	777	97	ENSG00000114805	PLCH1
bta-miR-23-25909	NM_015012	49	56	96	ENSG00000166471	TMEM41B
bta-miR-26-29685	NM_015012	49	56	96	ENSG00000166471	TMEM41B
bta-miR-26-29685	NM_015040	2886	2893	98	ENSG00000115020	PIKFYVE
bta-miR-23-25909	NM_015040	2886	2893	98	ENSG00000115020	PIKFYVE
bta-miR-8-44984	NM_015045	455	462	99	ENSG00000062650	WAPL
bta-miR-13-8622	NM_015052	166	173	98	ENSG00000002746	HECW1
bta-miR-8-44984	NM_015055	175	181	96	ENSG00000133789	SWAP70
bta-miR-9-46570	NM_015058	242	249	95	ENSG00000102763	VWA8
bta-miR-X-48106	NM_015058	242	249	95	ENSG00000102763	VWA8
bta-miR-8-44984	NM_015059	3282	3289	96	ENSG00000171914	TLN2
bta-miR-13-8186	NM_015087	81	88	97	ENSG00000133104	SPG20
bta-miR-23-25381	NM_015087	81	88	97	ENSG00000133104	SPG20
bta-miR-10-3364	NM_015087	81	88	97	ENSG00000133104	SPG20
bta-miR-17-14144	NM_015141	132	139	97	ENSG00000152642	GPD1L
bta-miR-26-29685	NM_015151	1762	1769	98	ENSG00000160305	DIP2A
bta-miR-23-25909	NM_015151	1762	1769	98	ENSG00000160305	DIP2A
bta-miR-X-48106	NM_015161	245	252	97	ENSG00000170540	ARL6IP1
bta-miR-9-46570	NM_015161	245	252	97	ENSG00000170540	ARL6IP1
bta-miR-8-44984	NM_015192	272	279	98	ENSG00000182621	PLCB1
bta-miR-17-14144	NM_015267	1995	2002	96	ENSG00000111249	CUX2
bta-miR-13-8622	NM_015267	1852	1859	95	ENSG00000111249	CUX2
bta-miR-23-25909	NM_015277	471	478	95	ENSG00000049759	NEDD4L
bta-miR-26-29685	NM_015277	471	478	95	ENSG00000049759	NEDD4L
bta-miR-8-44984	NM_015278	460	467	96	ENSG00000111961	SASH1
bta-miR-13-8622	NM_015306	2066	2073	96	ENSG00000162402	USP24
bta-miR-8-44984	NM_015316	21	28	96	ENSG00000088808	PPP1R13B
bta-miR-26-29685	NM_015317	394	401	95	ENSG00000055917	PUM2
bta-miR-23-25909	NM_015317	394	401	95	ENSG00000055917	PUM2
bta-miR-10-2785	NM_015326	2743	2750	95	ENSG00000266028	SRGAP2
bta-miR-8-44984	NM_015328	316	323	95	ENSG00000158467	AHCYL2
bta-miR-8-44984	NM_015332	2565	2572	99	ENSG00000015676	NUDCD3
bta-miR-10-2785	NM_015344	463	470	97	ENSG00000104660	LEPROTL1
bta-miR-9-46570	NM_015358	444	450	97	ENSG00000159256	MORC3
bta-miR-X-48106	NM_015358	444	450	97	ENSG00000159256	MORC3
bta-miR-9-46570	NM_015374	1419	1426	98	ENSG00000100242	SUN2
bta-miR-X-48106	NM_015374	1419	1426	98	ENSG00000100242	SUN2
bta-miR-18-16340	NM_015374	37	44	97	ENSG00000100242	SUN2
bta-miR-14-9195	NM_015374	37	44	97	ENSG00000100242	SUN2
bta-miR-8-44984	NM_015419	176	183	98	ENSG00000101825	MXRA5
bta-miR-13-8622	NM_015425	906	912	96	ENSG00000068654	POLR1A
bta-miR-8-44984	NM_015435	1215	1222	99	ENSG00000034677	RNF19A
bta-miR-10-2785	NM_015465	679	686	99	ENSG00000082516	GEMIN5
bta-miR-23-25909	NM_015469	308	315	98	ENSG00000136783	NIPSNAP3A
bta-miR-26-29685	NM_015469	308	315	97	ENSG00000136783	NIPSNAP3A
bta-miR-18-16340	NM_015493	96	102	96	ENSG00000197256	KANK2
bta-miR-2285v	NM_015493	175	182	96	ENSG00000197256	KANK2
bta-miR-14-9195	NM_015493	96	102	96	ENSG00000197256	KANK2
bta-miR-13-8622	NM_015513	751	758	98	ENSG00000163703	CRELD1
bta-miR-13-8622	NM_015517	273	280	97	ENSG00000172273	HINFP
bta-miR-26-29685	NM_015543	334	341	96	ENSG00000138069	RAB1A
bta-miR-23-25909	NM_015543	334	341	96	ENSG00000138069	RAB1A
bta-miR-10-2785	NM_015560	3092	3099	96	ENSG00000198836	OPA1
bta-miR-10-3364	NM_015564	3510	3517	98	ENSG00000146006	LRRTM2
bta-miR-23-25381	NM_015564	3510	3517	98	ENSG00000146006	LRRTM2
bta-miR-13-8186	NM_015564	3510	3517	98	ENSG00000146006	LRRTM2
bta-miR-26-29685	NM_015565	162	169	99	ENSG00000198862	LTN1
bta-miR-23-25909	NM_015565	162	169	99	ENSG00000198862	LTN1
bta-miR-23-25909	NM_015571	2339	2346	99	ENSG00000112701	SENP6
bta-miR-26-29685	NM_015571	2339	2346	99	ENSG00000112701	SENP6
bta-miR-23-25381	NM_015577	1258	1265	95	ENSG00000039560	RAI14
bta-miR-10-3364	NM_015577	1258	1265	95	ENSG00000039560	RAI14
bta-miR-13-8186	NM_015577	1258	1265	95	ENSG00000039560	RAI14
bta-miR-26-29685	NM_015584	975	982	97	ENSG00000004142	POLDIP2
bta-miR-23-25909	NM_015584	975	982	97	ENSG00000004142	POLDIP2
bta-miR-17-14144	NM_015599	93	100	99	ENSG00000013375	PGM3
bta-miR-23-25909	NM_015646	893	900	96	ENSG00000127314	RAP1B
bta-miR-26-29685	NM_015646	893	900	96	ENSG00000127314	RAP1B
bta-miR-23-25381	NM_015650	1492	1499	96	ENSG00000204104	TRAF3IP1
bta-miR-13-8186	NM_015650	1492	1499	96	ENSG00000204104	TRAF3IP1
bta-miR-10-3364	NM_015650	1492	1499	96	ENSG00000204104	TRAF3IP1
bta-miR-X-48106	NM_015656	407	414	95	ENSG00000066735	KIF26A
bta-miR-9-46570	NM_015656	407	414	95	ENSG00000066735	KIF26A
bta-miR-10-2785	NM_015690	170	177	99	ENSG00000163482	STK36
bta-miR-X-48106	NM_015693	46	53	97	ENSG00000164066	INTU
bta-miR-9-46570	NM_015693	46	53	97	ENSG00000164066	INTU
bta-miR-13-8622	NM_015715	905	912	98	ENSG00000100078	PLA2G3
bta-miR-13-8186	NM_015878	34	41	98	ENSG00000155096	AZIN1
bta-miR-23-25381	NM_015878	34	41	98	ENSG00000155096	AZIN1
bta-miR-10-3364	NM_015878	34	41	98	ENSG00000155096	AZIN1
bta-miR-26-29685	NM_015918	247	254	96	ENSG00000167272	POP5
bta-miR-24-26839	NM_015918	174	181	96	ENSG00000167272	POP5
bta-miR-23-25909	NM_015918	247	254	97	ENSG00000167272	POP5
bta-miR-X-48106	NM_015954	223	230	98	ENSG00000023697	DERA
bta-miR-9-46570	NM_015954	223	230	98	ENSG00000023697	DERA
bta-miR-10-2785	NM_015958	212	219	99	ENSG00000117543	DPH5
bta-miR-9-46570	NM_015990	285	292	96	ENSG00000109790	KLHL5
bta-miR-X-48106	NM_015990	285	292	96	ENSG00000109790	KLHL5
bta-miR-10-3364	NM_016060	747	754	97	ENSG00000108590	MED31
bta-miR-23-25381	NM_016060	747	754	97	ENSG00000108590	MED31
bta-miR-13-8186	NM_016060	747	754	97	ENSG00000108590	MED31
bta-miR-13-8622	NM_016095	171	178	98	ENSG00000131153	GINS2
bta-miR-10-3364	NM_016132	2695	2702	96	ENSG00000104177	MYEF2
bta-miR-13-8186	NM_016132	2695	2702	96	ENSG00000104177	MYEF2
bta-miR-23-25381	NM_016132	2695	2702	96	ENSG00000104177	MYEF2
bta-miR-17-14144	NM_016141	835	842	99	ENSG00000144635	DYNC1LI1
bta-miR-8-44984	NM_016147	602	609	97	ENSG00000214517	PPME1
bta-miR-10-2785	NM_016161	162	169	95	ENSG00000118017	A4GNT
bta-miR-26-29685	NM_016195	449	455	97	ENSG00000138182	KIF20B
bta-miR-23-25909	NM_016195	449	455	97	ENSG00000138182	KIF20B
bta-miR-26-29685	NM_016200	3220	3227	99	ENSG00000128534	LSM8
bta-miR-23-25909	NM_016200	3220	3227	99	ENSG00000128534	LSM8
bta-miR-23-25909	NM_016245	30	37	98	ENSG00000198189	HSD17B11
bta-miR-26-29685	NM_016245	30	37	98	ENSG00000198189	HSD17B11
bta-miR-23-25381	NM_016277	1121	1127	95	ENSG00000112210	RAB23
bta-miR-10-3364	NM_016277	1121	1127	95	ENSG00000112210	RAB23
bta-miR-13-8186	NM_016277	1121	1127	95	ENSG00000112210	RAB23
bta-miR-13-8186	NM_016283	255	262	99	ENSG00000085231	AK6
bta-miR-13-8186	NM_016283	255	262	99	ENSG00000279247	AK6
bta-miR-10-3364	NM_016283	255	262	99	ENSG00000085231	AK6
bta-miR-10-3364	NM_016283	255	262	99	ENSG00000279247	AK6
bta-miR-23-25381	NM_016283	255	262	99	ENSG00000085231	AK6
bta-miR-23-25381	NM_016283	255	262	99	ENSG00000279247	AK6
bta-miR-13-8622	NM_016306	149	156	99	ENSG00000090520	DNAJB11
bta-miR-10-2785	NM_016340	559	566	96	ENSG00000158987	RAPGEF6
bta-miR-8-44984	NM_016354	85	92	97	ENSG00000101187	SLCO4A1
bta-miR-23-25381	NM_016370	2676	2683	98	ENSG00000123570	RAB9B
bta-miR-13-8186	NM_016370	2676	2683	98	ENSG00000123570	RAB9B
bta-miR-10-3364	NM_016370	2676	2683	98	ENSG00000123570	RAB9B
bta-miR-17-14144	NM_016395	211	218	96	ENSG00000074696	HACD3
bta-miR-10-2785	NM_016399	308	315	97	ENSG00000170855	TRIAP1
bta-miR-8-44984	NM_016400	199	206	98	ENSG00000242028	HYPK
bta-miR-18-16340	NM_016417	436	442	95	ENSG00000182512	GLRX5
bta-miR-14-9195	NM_016417	436	442	95	ENSG00000182512	GLRX5
bta-miR-23-25909	NM_016436	2388	2394	97	ENSG00000025293	PHF20
bta-miR-10-2785	NM_016436	1695	1702	95	ENSG00000025293	PHF20
bta-miR-26-29685	NM_016436	2388	2394	97	ENSG00000025293	PHF20
bta-miR-26-29685	NM_016470	415	422	96	ENSG00000132823	OSER1
bta-miR-23-25909	NM_016470	415	422	96	ENSG00000132823	OSER1
bta-miR-17-14144	NM_016487	52	59	96	ENSG00000130349	C6orf203
bta-miR-17-14144	NM_016523	438	445	99	ENSG00000150045	KLRF1
bta-miR-9-46570	NM_016548	1097	1104	96	ENSG00000135052	GOLM1
bta-miR-X-48106	NM_016548	1097	1104	96	ENSG00000135052	GOLM1
bta-miR-13-8622	NM_016577	4228	4235	97	ENSG00000154917	RAB6B
bta-miR-23-25909	NM_016589	280	286	96	ENSG00000113845	TIMMDC1
bta-miR-26-29685	NM_016589	280	286	96	ENSG00000113845	TIMMDC1
bta-miR-9-46570	NM_016618	21	28	98	ENSG00000172086	KRCC1
bta-miR-X-48106	NM_016618	21	28	98	ENSG00000172086	KRCC1
bta-miR-13-8622	NM_016626	104	110	96	ENSG00000176624	MEX3C
bta-miR-17-14144	NM_016630	78	85	95	ENSG00000090487	SPG21
bta-miR-10-2785	NM_016653	919	926	98	ENSG00000091436
bta-miR-23-25909	NM_016836	218	225	98	ENSG00000153250	RBMS1
bta-miR-26-29685	NM_016836	218	225	98	ENSG00000153250	RBMS1
bta-miR-2285v	NM_016836	2481	2488	99	ENSG00000153250	RBMS1
bta-miR-13-8622	NM_016931	1664	1671	98	ENSG00000086991	NOX4
bta-miR-10-2785	NM_016931	154	161	95	ENSG00000086991	NOX4
bta-miR-10-2785	NM_016953	753	760	95	ENSG00000128655	PDE11A
bta-miR-10-2785	NM_016955	528	535	96	ENSG00000109618	SEPSECS
bta-miR-17-14144	NM_017440	182	189	99	ENSG00000111554	MDM1
bta-miR-X-48106	NM_017456	1687	1693	97	ENSG00000108669	CYTH1
bta-miR-9-46570	NM_017456	1687	1693	97	ENSG00000108669	CYTH1
bta-miR-26-29685	NM_017459	332	338	97	ENSG00000117122	MFAP2
bta-miR-23-25909	NM_017459	332	338	97	ENSG00000117122	MFAP2
bta-miR-8-44984	NM_017512	3011	3018	98	ENSG00000132199	ENOSF1
bta-miR-9-46570	NM_017520	284	291	99	ENSG00000196199	MPHOSPH8
bta-miR-X-48106	NM_017520	284	291	99	ENSG00000196199	MPHOSPH8
bta-miR-13-8622	NM_017546	270	277	98	ENSG00000158435	CNOT11
bta-miR-10-2785	NM_017575	1471	1478	96	ENSG00000070366	SMG6
bta-miR-10-2785	NM_017628	2861	2867	96	ENSG00000168769	TET2
bta-miR-17-14144	NM_017634	565	572	96	ENSG00000104756	KCTD9
bta-miR-9-46570	NM_017658	4260	4266	95	ENSG00000179454	KLHL28
bta-miR-X-48106	NM_017658	4260	4266	95	ENSG00000179454	KLHL28
bta-miR-10-3364	NM_017666	187	194	97	ENSG00000056277	ZNF280C
bta-miR-23-25381	NM_017666	187	194	97	ENSG00000056277	ZNF280C
bta-miR-13-8186	NM_017666	187	194	97	ENSG00000056277	ZNF280C
bta-miR-13-8622	NM_017669	92	99	99	ENSG00000186871	ERCC6L
bta-miR-X-48106	NM_017696	137	144	99	ENSG00000111877	MCM9
bta-miR-9-46570	NM_017696	137	144	99	ENSG00000111877	MCM9
bta-miR-10-2785	NM_017703	332	339	96	ENSG00000127452	FBXL12
bta-miR-17-14144	NM_017705	2844	2851	97	ENSG00000137819	PAQR5
bta-miR-8-44984	NM_017737	81	88	99	ENSG00000137942	FNBP1L
bta-miR-9-46570	NM_017737	1735	1742	99	ENSG00000137942	FNBP1L
bta-miR-X-48106	NM_017737	1735	1742	99	ENSG00000137942	FNBP1L
bta-miR-13-8622	NM_017742	214	221	99	ENSG00000141664	ZCCHC2
bta-miR-X-48106	NM_017743	536	543	96	ENSG00000074603	DPP8
bta-miR-9-46570	NM_017743	536	543	96	ENSG00000074603	DPP8
bta-miR-8-44984	NM_017750	446	453	97	ENSG00000042445	RETSAT
bta-miR-8-44984	NM_017765	326	333	96	ENSG00000040487	PQLC2
bta-miR-X-48106	NM_017770	2304	2311	97	ENSG00000197977	ELOVL2
bta-miR-9-46570	NM_017770	2304	2311	97	ENSG00000197977	ELOVL2
bta-miR-10-3364	NM_017847	536	543	96	ENSG00000157181	C1orf27
bta-miR-23-25381	NM_017847	536	543	96	ENSG00000157181	C1orf27
bta-miR-13-8186	NM_017847	536	543	96	ENSG00000157181	C1orf27
bta-miR-23-25909	NM_017890	1200	1207	96	ENSG00000132549	VPS13B
bta-miR-26-29685	NM_017890	1200	1207	96	ENSG00000132549	VPS13B
bta-miR-23-25909	NM_017906	117	123	95	ENSG00000111845	PAK1IP1
bta-miR-26-29685	NM_017906	117	123	95	ENSG00000111845	PAK1IP1
bta-miR-23-25909	NM_017915	20	26	95	ENSG00000185480	PARPBP
bta-miR-26-29685	NM_017915	20	26	95	ENSG00000185480	PARPBP
bta-miR-X-48106	NM_017925	1221	1228	99	ENSG00000137145	DENND4C
bta-miR-9-46570	NM_017925	1221	1228	99	ENSG00000137145	DENND4C
bta-miR-X-48106	NM_017931	66	73	95	ENSG00000075234	TTC38
bta-miR-9-46570	NM_017931	66	73	95	ENSG00000075234	TTC38
bta-miR-17-14144	NM_017971	126	133	98	ENSG00000242485	MRPL20
bta-miR-23-25381	NM_017994	2612	2619	96	ENSG00000106609	TMEM248
bta-miR-13-8186	NM_017994	2612	2619	96	ENSG00000106609	TMEM248
bta-miR-10-3364	NM_017994	2612	2619	96	ENSG00000106609	TMEM248
bta-miR-26-29685	NM_018014	1231	1238	99	ENSG00000119866	BCL11A
bta-miR-23-25909	NM_018014	1231	1238	99	ENSG00000119866	BCL11A
bta-miR-10-2785	NM_018018	1771	1777	97	ENSG00000139209	SLC38A4
bta-miR-13-8622	NM_018048	138	145	98	ENSG00000111196	MAGOHB
bta-miR-10-2785	NM_018063	220	227	98	ENSG00000119969	HELLS
bta-miR-17-14144	NM_018063	196	203	99	ENSG00000119969	HELLS
bta-miR-9-46570	NM_018105	183	189	96	ENSG00000131931	THAP1
bta-miR-X-48106	NM_018105	183	189	96	ENSG00000131931	THAP1
bta-miR-9-46570	NM_018113	511	517	95	ENSG00000139636	LMBR1L
bta-miR-X-48106	NM_018113	511	517	95	ENSG00000139636	LMBR1L
bta-miR-10-2785	NM_018119	316	323	95	ENSG00000058600	POLR3E
bta-miR-10-3364	NM_018124	153	160	95	ENSG00000168411	RFWD3
bta-miR-13-8186	NM_018124	153	160	95	ENSG00000168411	RFWD3
bta-miR-23-25381	NM_018124	153	160	95	ENSG00000168411	RFWD3
bta-miR-17-14144	NM_018140	73	80	98	ENSG00000112877	CEP72
bta-miR-13-8622	NM_018141	1052	1059	99	ENSG00000048544	MRPS10
bta-miR-17-14144	NM_018176	64	71	95	ENSG00000153012	LGI2
bta-miR-9-46570	NM_018183	382	389	96	ENSG00000139697	SBNO1
bta-miR-X-48106	NM_018183	382	389	96	ENSG00000139697	SBNO1
bta-miR-10-3364	NM_018192	94	101	99	ENSG00000090530	P3H2
bta-miR-13-8186	NM_018192	94	101	99	ENSG00000090530	P3H2
bta-miR-23-25381	NM_018192	94	101	99	ENSG00000090530	P3H2
bta-miR-10-3364	NM_018229	872	879	97	ENSG00000053770	AP5M1
bta-miR-23-25381	NM_018229	872	879	97	ENSG00000053770	AP5M1
bta-miR-13-8186	NM_018229	872	879	97	ENSG00000053770	AP5M1
bta-miR-10-2785	NM_018252	327	334	98	ENSG00000065600	TMEM206
bta-miR-26-29685	NM_018259	723	730	98	ENSG00000052841	TTC17
bta-miR-23-25909	NM_018259	723	730	98	ENSG00000052841	TTC17
bta-miR-10-2785	NM_018284	670	677	98	ENSG00000117226	GBP3
bta-miR-17-14144	NM_018290	884	891	95	ENSG00000169299	PGM2
bta-miR-10-2785	NM_018301	1038	1045	98	ENSG00000089682	RBM41
bta-miR-13-8622	NM_018304	403	410	97	ENSG00000068489	PRR11
bta-miR-17-14144	NM_018318	766	773	99	ENSG00000123106	CCDC91
bta-miR-X-48106	NM_018344	671	678	97	ENSG00000198246	SLC29A3
bta-miR-9-46570	NM_018344	671	678	97	ENSG00000198246	SLC29A3
bta-miR-X-48106	NM_018351	664	671	95	ENSG00000180263	FGD6
bta-miR-9-46570	NM_018351	664	671	95	ENSG00000180263	FGD6
bta-miR-26-29685	NM_018353	171	177	95	ENSG00000129534	MIS18BP1
bta-miR-23-25909	NM_018353	171	177	95	ENSG00000129534	MIS18BP1
bta-miR-23-25381	NM_018367	293	300	96	ENSG00000078124	ACER3
bta-miR-10-3364	NM_018367	293	300	96	ENSG00000078124	ACER3
bta-miR-13-8186	NM_018367	293	300	96	ENSG00000078124	ACER3
bta-miR-10-2785	NM_018444	290	297	97	ENSG00000164951	PDP1
bta-miR-13-8186	NM_018448	54	61	98	ENSG00000111530	CAND1
bta-miR-23-25381	NM_018448	54	61	98	ENSG00000111530	CAND1
bta-miR-10-3364	NM_018448	54	61	98	ENSG00000111530	CAND1
bta-miR-17-14144	NM_018471	458	465	97	ENSG00000065548	ZC3H15
bta-miR-10-2785	NM_018639	1198	1205	99	ENSG00000176871	WSB2
bta-miR-8-44984	NM_018646	105	112	95	ENSG00000276971	TRPV6
bta-miR-8-44984	NM_018646	105	112	95	ENSG00000165125	TRPV6
bta-miR-14-9195	NM_018649	68	74	95	ENSG00000099284	H2AFY2
bta-miR-13-8622	NM_018649	539	545	97	ENSG00000099284	H2AFY2
bta-miR-18-16340	NM_018649	68	74	95	ENSG00000099284	H2AFY2
bta-miR-13-8622	NM_018699	324	330	96	ENSG00000138738	PRDM5
bta-miR-14-9195	NM_018700	51	58	99	ENSG00000152503	TRIM36
bta-miR-18-16340	NM_018700	51	58	99	ENSG00000152503	TRIM36
bta-miR-10-2785	NM_018836	654	661	96	ENSG00000196581	AJAP1
bta-miR-8-44984	NM_018891	121	128	99	ENSG00000058085	LAMC2
bta-miR-26-29685	NM_018941	73	80	98	ENSG00000182372	CLN8
bta-miR-26-29685	NM_018941	73	80	98	ENSG00000278220	CLN8
bta-miR-23-25909	NM_018941	73	80	98	ENSG00000182372	CLN8
bta-miR-23-25909	NM_018941	73	80	98	ENSG00000278220	CLN8
bta-miR-18-16340	NM_018942	108	115	97	ENSG00000215612	HMX1
bta-miR-14-9195	NM_018942	108	115	97	ENSG00000215612	HMX1
bta-miR-2285v	NM_018947	198	205	99	ENSG00000172115	CYCS
bta-miR-X-48106	NM_018959	213	219	97	ENSG00000071626	DAZAP1
bta-miR-9-46570	NM_018959	213	219	97	ENSG00000071626	DAZAP1
bta-miR-26-29685	NM_018962	976	982	96	ENSG00000183145	RIPPLY3
bta-miR-23-25909	NM_018962	976	982	96	ENSG00000183145	RIPPLY3
bta-miR-13-8622	NM_018970	2590	2596	96	ENSG00000164604	GPR85
bta-miR-17-14144	NM_018988	1067	1074	97	ENSG00000145990	GFOD1
bta-miR-26-29685	NM_018990	450	457	95	ENSG00000122122	SASH3
bta-miR-23-25909	NM_018990	450	457	95	ENSG00000122122	SASH3
bta-miR-23-25909	NM_019028	172	179	98	ENSG00000177054	ZDHHC13
bta-miR-26-29685	NM_019028	172	179	98	ENSG00000177054	ZDHHC13
bta-miR-26-29685	NM_019042	489	496	95	ENSG00000091127	PUS7
bta-miR-23-25909	NM_019042	489	496	95	ENSG00000091127	PUS7
bta-miR-23-25381	NM_019045	77	84	99	ENSG00000131725	WDR44
bta-miR-10-3364	NM_019045	77	84	99	ENSG00000131725	WDR44
bta-miR-13-8186	NM_019045	77	84	99	ENSG00000131725	WDR44
bta-miR-X-48106	NM_019053	657	664	97	ENSG00000138190	EXOC6
bta-miR-9-46570	NM_019053	657	664	97	ENSG00000138190	EXOC6
bta-miR-13-8622	NM_019067	2092	2099	98	ENSG00000130119	GNL3L
bta-miR-10-2785	NM_019069	251	258	98	ENSG00000196981	WDR5B
bta-miR-10-2785	NM_019099	4180	4187	99	ENSG00000197852	FAM212B
bta-miR-13-8622	NM_019848	100	107	99	ENSG00000126903	SLC10A3
bta-miR-8-44984	NM_020041	57	64	99	ENSG00000109667	SLC2A9
bta-miR-26-29685	NM_020062	786	793	99	ENSG00000125520	SLC2A4RG
bta-miR-23-25909	NM_020062	786	793	99	ENSG00000125520	SLC2A4RG
bta-miR-13-8622	NM_020116	271	278	98	ENSG00000168843	FSTL5
bta-miR-23-25381	NM_020117	282	289	97	ENSG00000133706	LARS
bta-miR-13-8186	NM_020117	282	289	97	ENSG00000133706	LARS
bta-miR-10-3364	NM_020117	282	289	97	ENSG00000133706	LARS
bta-miR-10-2785	NM_020141	110	117	95	ENSG00000215717	TMEM167B
bta-miR-9-46570	NM_020184	285	292	98	ENSG00000158158	CNNM4
bta-miR-X-48106	NM_020184	285	292	98	ENSG00000158158	CNNM4
bta-miR-X-48106	NM_020195	173	180	98	ENSG00000100445	SDR39U1
bta-miR-9-46570	NM_020195	173	180	98	ENSG00000100445	SDR39U1
bta-miR-13-8622	NM_020205	3301	3308	98	ENSG00000264522	OTUD7B
bta-miR-23-25909	NM_020216	272	279	99	ENSG00000176393	RNPEP
bta-miR-26-29685	NM_020216	272	279	99	ENSG00000176393	RNPEP
bta-miR-10-2785	NM_020235	228	235	98	ENSG00000114439	BBX
bta-miR-17-14144	NM_020251	5759	5766	95	ENSG00000137486	ARRB1
bta-miR-17-14144	NM_020307	213	220	98	ENSG00000163660	CCNL1
bta-miR-X-48106	NM_020312	586	593	99	ENSG00000088682	COQ9
bta-miR-9-46570	NM_020312	586	593	99	ENSG00000088682	COQ9
bta-miR-14-9195	NM_020319	817	823	96	ENSG00000106524	ANKMY2
bta-miR-18-16340	NM_020319	817	823	96	ENSG00000106524	ANKMY2
bta-miR-13-8186	NM_020348	2222	2229	99	ENSG00000119946	CNNM1
bta-miR-10-3364	NM_020348	2222	2229	99	ENSG00000119946	CNNM1
bta-miR-23-25381	NM_020348	2222	2229	99	ENSG00000119946	CNNM1
bta-miR-9-46570	NM_020367	2437	2444	99	ENSG00000111224	PARP11
bta-miR-X-48106	NM_020367	2437	2444	99	ENSG00000111224	PARP11
bta-miR-8-44984	NM_020375	2624	2631	98	ENSG00000078237	TIGAR
bta-miR-10-2785	NM_020408	215	222	96	ENSG00000214113	LYRM4
bta-miR-13-8622	NM_020414	223	229	97	ENSG00000273761	DDX24
bta-miR-13-8622	NM_020414	223	229	97	ENSG00000089737	DDX24
bta-miR-17-14144	NM_020429	2706	2713	96	ENSG00000198742	SMURF1
bta-miR-8-44984	NM_020439	786	793	99	ENSG00000008118	CAMK1G
bta-miR-13-8622	NM_020459	573	580	95	ENSG00000124374	PAIP2B
bta-miR-9-46570	NM_020661	170	177	96	ENSG00000111732	AICDA
bta-miR-X-48106	NM_020661	170	177	96	ENSG00000111732	AICDA
bta-miR-17-14144	NM_020672	120	127	96	ENSG00000189334	S100A14
bta-miR-10-2785	NM_020672	574	581	99	ENSG00000189334	S100A14
bta-miR-8-44984	NM_020717	4147	4154	99	ENSG00000158352	SHROOM4
bta-miR-18-16340	NM_020738	982	989	98	ENSG00000134313	KIDINS220
bta-miR-14-9195	NM_020738	982	989	98	ENSG00000134313	KIDINS220
bta-miR-13-8186	NM_020781	298	305	95	ENSG00000197024	ZNF398
bta-miR-10-3364	NM_020781	298	305	95	ENSG00000197024	ZNF398
bta-miR-23-25381	NM_020781	298	305	95	ENSG00000197024	ZNF398
bta-miR-8-44984	NM_020807	592	599	95	ENSG00000166188	ZNF319
bta-miR-8-44984	NM_020811	592	599	97	ENSG00000172508	CARNS1
bta-miR-17-14144	NM_020944	280	287	99	ENSG00000070610	GBA2
bta-miR-26-29685	NM_020948	3272	3279	97	ENSG00000198160	MIER1
bta-miR-23-25909	NM_020948	3272	3279	97	ENSG00000198160	MIER1
bta-miR-10-2785	NM_020952	796	803	99	ENSG00000083067	TRPM3
bta-miR-13-8622	NM_020972	702	709	96	ENSG00000159733	ZFYVE28
bta-miR-13-8622	NM_020993	48	55	95	ENSG00000110987	BCL7A
bta-miR-26-29685	NM_021045	41	47	96	ENSG00000198105	ZNF248
bta-miR-23-25909	NM_021045	41	47	96	ENSG00000198105	ZNF248
bta-miR-24-26839	NM_021081	49	56	98	ENSG00000118702	GHRH
bta-miR-9-46570	NM_021097	2739	2745	95	ENSG00000183023	SLC8A1
bta-miR-X-48106	NM_021097	2739	2745	95	ENSG00000183023	SLC8A1
bta-miR-23-25381	NM_021098	644	651	98	ENSG00000196557	CACNA1H
bta-miR-13-8186	NM_021098	644	651	98	ENSG00000196557	CACNA1H
bta-miR-10-3364	NM_021098	644	651	98	ENSG00000196557	CACNA1H
bta-miR-10-3364	NM_021143	934	941	99	ENSG00000132010	ZNF20
bta-miR-23-25381	NM_021143	934	941	99	ENSG00000132010	ZNF20
bta-miR-13-8186	NM_021143	934	941	99	ENSG00000132010	ZNF20
bta-miR-17-14144	NM_021158	695	702	97	ENSG00000101255	TRIB3
bta-miR-X-48106	NM_021187	244	251	97	ENSG00000171903	CYP4F11
bta-miR-9-46570	NM_021187	244	251	97	ENSG00000171903	CYP4F11
bta-miR-X-48106	NM_021216	914	921	97	ENSG00000197951	ZNF71
bta-miR-9-46570	NM_021216	914	921	97	ENSG00000197951	ZNF71
bta-miR-10-2785	NM_021218	168	175	98	ENSG00000148153	INIP
bta-miR-23-25381	NM_021240	673	680	98	ENSG00000064218	DMRT3
bta-miR-13-8186	NM_021240	673	680	98	ENSG00000064218	DMRT3
bta-miR-10-3364	NM_021240	673	680	98	ENSG00000064218	DMRT3
bta-miR-X-48106	NM_021260	43	50	99	ENSG00000165861	ZFYVE1
bta-miR-9-46570	NM_021260	43	50	99	ENSG00000165861	ZFYVE1
bta-miR-17-14144	NM_021572	1266	1273	98	ENSG00000112796	ENPP5
bta-miR-8-44984	NM_021633	75	82	99	ENSG00000117153	KLHL12
bta-miR-10-2785	NM_021636	53	60	98	ENSG00000133067	LGR6
bta-miR-13-8622	NM_021645	150	157	99	ENSG00000253797	UTP14C
[truncated: 741 more rows]

## Sheet: TS1d.TURQUOISE MODULE
Table S1d. Predicted Target genes for miRNA members of the TURQUOISE module
miRNAs	TRANSCRIPT ID	UTR.start	UTR.end	context.score.percentile	ensembl_gene_id	hgnc_symbol
bta-miR-2285b	NM_000015	19	26	99	ENSG00000156006	NAT2
bta-miR-3-33975	NM_000016	80	86	95	ENSG00000117054	ACADM
bta-miR-X-48475	NM_000017	485	492	97	ENSG00000122971	ACADS
bta-miR-2285b	NM_000019	225	231	95	ENSG00000075239	ACAT1
bta-let-7i	NM_000024	298	305	98	ENSG00000169252	ADRB2
bta-miR-X-48475	NM_000031	880	887	95	ENSG00000148218	ALAD
bta-miR-1249	NM_000031	1261	1268	97	ENSG00000148218	ALAD
bta-miR-142-3p	NM_000035	120	127	96	ENSG00000136872	ALDOB
bta-miR-10a	NM_000037	401	408	97	ENSG00000029534	ANK1
bta-miR-27a-3p	NM_000043	1157	1164	99	ENSG00000026103	FAS
bta-miR-15b	NM_000052	15	22	99	ENSG00000165240	ATP7A
bta-miR-185	NM_000063	43	50	95	ENSG00000231543	C2
bta-miR-185	NM_000063	43	50	95	ENSG00000204364	C2
bta-miR-185	NM_000063	43	50	95	ENSG00000226560	C2
bta-miR-185	NM_000063	43	50	95	ENSG00000235696	C2
bta-miR-185	NM_000063	43	50	95	ENSG00000166278	C2
bta-miR-185	NM_000063	43	50	95	ENSG00000235017	C2
bta-miR-185	NM_000063	43	50	95	ENSG00000206372	C2
bta-miR-21-3p	NM_000063	198	205	97	ENSG00000231543	C2
bta-miR-21-3p	NM_000063	198	205	97	ENSG00000204364	C2
bta-miR-21-3p	NM_000063	198	205	97	ENSG00000226560	C2
bta-miR-21-3p	NM_000063	198	205	97	ENSG00000235696	C2
bta-miR-21-3p	NM_000063	198	205	97	ENSG00000166278	C2
bta-miR-21-3p	NM_000063	198	205	97	ENSG00000235017	C2
bta-miR-21-3p	NM_000063	198	205	97	ENSG00000206372	C2
bta-miR-21-3p	NM_000065	294	301	95	ENSG00000039537	C6
bta-miR-23-25873	NM_000065	18	25	96	ENSG00000039537	C6
bta-miR-27a-3p	NM_000068	1448	1455	96	ENSG00000141837	CACNA1A
bta-miR-146a	NM_000073	40	47	95	ENSG00000160654	CD3G
bta-miR-2448-5p	NM_000081	701	708	97	ENSG00000143669	LYST
bta-miR-2-20213	NM_000082	32	39	99	ENSG00000049167	ERCC8
bta-miR-2284v	NM_000082	32	39	99	ENSG00000049167	ERCC8
bta-miR-X-47796	NM_000082	32	39	99	ENSG00000049167	ERCC8
bta-miR-454	NM_000084	146	153	95	ENSG00000171365	CLCN5
bta-miR-1842	NM_000085	21	28	97	ENSG00000184908	CLCNKB
bta-miR-2-20213	NM_000088	251	257	95	ENSG00000108821	COL1A1
bta-miR-X-47796	NM_000088	251	257	95	ENSG00000108821	COL1A1
bta-miR-2284v	NM_000088	251	257	95	ENSG00000108821	COL1A1
bta-miR-2284aa	NM_000088	252	259	98	ENSG00000108821	COL1A1
bta-let-7i	NM_000089	382	389	97	ENSG00000164692	COL1A2
bta-miR-2468	NM_000090	474	481	96	ENSG00000168542	COL3A1
bta-let-7i	NM_000090	392	399	95	ENSG00000168542	COL3A1
bta-miR-147	NM_000095	38	45	97	ENSG00000105664	COMP
bta-miR-1249	NM_000113	527	534	95	ENSG00000136827	TOR1A
bta-miR-27a-3p	NM_000113	640	647	96	ENSG00000136827	TOR1A
bta-miR-27a-3p	NM_000113	619	626	95	ENSG00000136827	TOR1A
bta-miR-142-5p	NM_000115	2225	2232	97	ENSG00000136160	EDNRB
bta-miR-142-5p	NM_000121	198	205	99	ENSG00000187266	EPOR
bta-miR-10-2797	NM_000122	63	70	99	ENSG00000163161	ERCC3
bta-let-7i	NM_000124	115	122	99	ENSG00000225830	ERCC6
bta-miR-18a	NM_000125	4180	4187	99	ENSG00000091831	ESR1
bta-miR-142-3p	NM_000125	4156	4163	98	ENSG00000091831	ESR1
bta-miR-18a	NM_000125	4217	4224	99	ENSG00000091831	ESR1
bta-miR-2-20213	NM_000127	311	317	96	ENSG00000182197	EXT1
bta-miR-X-47796	NM_000127	311	317	96	ENSG00000182197	EXT1
bta-miR-2284aa	NM_000127	312	318	96	ENSG00000182197	EXT1
bta-miR-2284v	NM_000127	311	317	96	ENSG00000182197	EXT1
bta-miR-2285f	NM_000127	303	310	99	ENSG00000182197	EXT1
bta-miR-454	NM_000128	976	983	99	ENSG00000088926	F11
bta-miR-132	NM_000129	1496	1503	97	ENSG00000124491	F13A1
bta-miR-23-25873	NM_000132	320	327	97	ENSG00000185010	F8
bta-miR-X-48475	NM_000137	423	430	99	ENSG00000103876	FAH
bta-miR-1842	NM_000138	2159	2166	97	ENSG00000166147	FBN1
bta-miR-146a	NM_000148	356	363	95	ENSG00000174951	FUT1
bta-miR-1842	NM_000153	53	60	99	ENSG00000054983	GALC
bta-miR-27a-5p	NM_000157	120	127	95	ENSG00000262446	GBA
bta-miR-27a-5p	NM_000157	120	127	95	ENSG00000177628	GBA
bta-miR-15b	NM_000163	1713	1720	96	ENSG00000112964	GHR
bta-miR-18a	NM_000165	54	61	98	ENSG00000152661	GJA1
bta-miR-454	NM_000165	1392	1399	95	ENSG00000152661	GJA1
bta-miR-2284aa	NM_000167	2558	2565	98	ENSG00000198814	GK
bta-miR-2284w	NM_000168	3289	3295	95	ENSG00000106571	GLI3
bta-miR-2284v	NM_000176	3809	3816	98	ENSG00000113580	NR3C1
bta-miR-X-47796	NM_000176	3809	3816	98	ENSG00000113580	NR3C1
bta-miR-2-20213	NM_000176	3809	3816	98	ENSG00000113580	NR3C1
bta-miR-142-5p	NM_000179	71	77	97	ENSG00000116062	MSH6
bta-miR-18a	NM_000182	485	492	95	ENSG00000084754	HADHA
bta-miR-2448-5p	NM_000185	34	41	96	ENSG00000099937	SERPIND1
bta-miR-146a	NM_000186	39	46	97	ENSG00000000971	CFH
bta-miR-10a	NM_000192	1405	1412	97	ENSG00000089225	TBX5
bta-miR-454	NM_000194	180	187	95	ENSG00000165704	HPRT1
bta-miR-2-20213	NM_000194	341	348	96	ENSG00000165704	HPRT1
bta-miR-X-47796	NM_000194	341	348	95	ENSG00000165704	HPRT1
bta-miR-2284v	NM_000194	341	348	96	ENSG00000165704	HPRT1
bta-miR-2284aa	NM_000197	136	142	96	ENSG00000130948	HSD17B3
bta-miR-27a-3p	NM_000208	193	200	95	ENSG00000171105	INSR
bta-miR-1842	NM_000209	327	334	97	ENSG00000139515	PDX1
bta-miR-2285b	NM_000209	1035	1042	99	ENSG00000139515	PDX1
bta-miR-142-3p	NM_000210	2182	2189	96	ENSG00000091409	ITGA6
bta-miR-27a-3p	NM_000220	975	982	97	ENSG00000151704	KCNJ1
bta-miR-2285f	NM_000222	1997	2004	97	ENSG00000157404	KIT
bta-miR-2468	NM_000222	189	196	96	ENSG00000157404	KIT
bta-miR-10-2797	NM_000222	1899	1906	99	ENSG00000157404	KIT
bta-miR-23-25873	NM_000232	85	91	95	ENSG00000163069	SGCB
bta-miR-142-5p	NM_000235	1169	1176	97	ENSG00000107798	LIPA
bta-miR-185	NM_000235	135	142	99	ENSG00000107798	LIPA
bta-miR-454	NM_000245	93	100	98	ENSG00000105976	MET
bta-miR-2285b	NM_000248	51	58	97	ENSG00000187098	MITF
bta-miR-27a-3p	NM_000253	259	266	96	ENSG00000138823	MTTP
bta-miR-27a-3p	NM_000259	5452	5459	96	ENSG00000197535	MYO5A
bta-miR-15b	NM_000259	625	632	95	ENSG00000197535	MYO5A
bta-miR-10-2797	NM_000266	106	113	97	ENSG00000124479	NDP
bta-miR-2284aa	NM_000274	323	330	96	ENSG00000065154	OAT
bta-miR-223	NM_000280	4827	4834	98	ENSG00000007372	PAX6
bta-miR-146a	NM_000283	326	333	96	ENSG00000133256	PDE6B
bta-miR-27a-3p	NM_000286	109	116	99	ENSG00000108733	PEX12
bta-miR-10a	NM_000286	65	72	97	ENSG00000108733	PEX12
bta-miR-X-48475	NM_000287	316	323	98	ENSG00000124587	PEX6
bta-miR-146a	NM_000293	200	207	99	ENSG00000102893	PHKB
bta-miR-2284aa	NM_000301	856	863	97	ENSG00000122194	PLG
bta-miR-27a-5p	NM_000304	375	382	96	ENSG00000109099	PMP22
bta-miR-10a	NM_000305	307	314	99	ENSG00000105854	PON2
bta-miR-142-3p	NM_000307	198	205	96	ENSG00000196767	POU3F4
bta-miR-2285f	NM_000313	1120	1127	98	ENSG00000184500	PROS1
bta-miR-2285q	NM_000313	136	142	95	ENSG00000184500	PROS1
bta-miR-15b	NM_000315	54	61	99	ENSG00000152266	PTH
bta-miR-223	NM_000319	1130	1137	98	ENSG00000139197	PEX5
bta-miR-27a-5p	NM_000322	392	399	96	ENSG00000112619	PRPH2
bta-miR-X-47796	NM_000328	88	95	98	ENSG00000156313	RPGR
bta-miR-2-20213	NM_000328	88	95	98	ENSG00000156313	RPGR
bta-miR-142-5p	NM_000328	310	316	97	ENSG00000156313	RPGR
bta-miR-2284v	NM_000328	88	95	98	ENSG00000156313	RPGR
bta-miR-15b	NM_000330	1772	1779	99	ENSG00000102104	RS1
bta-miR-18a	NM_000332	6760	6767	97	ENSG00000124788	ATXN1
bta-miR-454	NM_000332	6878	6885	95	ENSG00000124788	ATXN1
bta-miR-21-3p	NM_000333	3834	3841	96	ENSG00000163635	ATXN7
bta-miR-1842	NM_000334	1204	1211	95	ENSG00000007314	SCN4A
bta-miR-142-5p	NM_000338	889	896	98	ENSG00000074803	SLC12A1
bta-miR-3-33975	NM_000342	1590	1597	99	ENSG00000004939	SLC4A1
bta-miR-21-3p	NM_000345	1447	1454	97	ENSG00000145335	SNCA
bta-miR-2285f	NM_000345	1619	1626	97	ENSG00000145335	SNCA
bta-miR-X-47796	NM_000348	69	76	95	ENSG00000277893	SRD5A2
bta-miR-2-20213	NM_000348	69	76	95	ENSG00000277893	SRD5A2
bta-miR-185	NM_000356	222	229	98	ENSG00000070814	TCOF1
bta-miR-1842	NM_000358	555	562	95	ENSG00000120708	TGFBI
bta-miR-18a	NM_000361	52	59	95	ENSG00000178726	THBD
bta-miR-2284aa	NM_000367	136	143	97	ENSG00000137364	TPMT
bta-miR-27a-3p	NM_000368	4740	4747	99	ENSG00000165699	TSC1
bta-miR-454	NM_000368	4767	4774	99	ENSG00000165699	TSC1
bta-miR-2285b	NM_000369	1792	1798	96	ENSG00000165409	TSHR
bta-miR-3-33975	NM_000370	787	794	97	ENSG00000137561	TTPA
bta-miR-2284aa	NM_000370	169	176	96	ENSG00000137561	TTPA
bta-miR-142-5p	NM_000371	87	94	96	ENSG00000118271	TTR
bta-miR-21-3p	NM_000376	2508	2515	99	ENSG00000111424	VDR
bta-miR-23-25873	NM_000379	386	393	95	ENSG00000158125	XDH
bta-miR-142-3p	NM_000380	85	91	96	ENSG00000136936	XPA
bta-miR-142-3p	NM_000381	3777	3784	98	ENSG00000101871	MID1
bta-miR-223	NM_000386	543	550	95	ENSG00000108578	BLMH
bta-miR-185	NM_000393	1887	1894	99	ENSG00000204262	COL5A2
bta-miR-15b	NM_000401	923	930	99	ENSG00000151348	EXT2
bta-miR-X-48475	NM_000405	433	440	95	ENSG00000196743	GM2A
bta-miR-142-3p	NM_000406	63	70	98	ENSG00000109163	GNRHR
bta-miR-27a-5p	NM_000408	2913	2920	97	ENSG00000115159	GPD2
bta-miR-2285b	NM_000408	3351	3358	96	ENSG00000115159	GPD2
bta-miR-2285b	NM_000414	138	144	96	ENSG00000133835	HSD17B4
bta-miR-2284aa	NM_000415	257	264	98	ENSG00000121351	IAPP
bta-miR-146a	NM_000418	127	134	95	ENSG00000077238	IL4R
bta-miR-142-3p	NM_000428	2381	2388	95	ENSG00000119681	LTBP2
bta-miR-27a-3p	NM_000434	612	619	98	ENSG00000234343	NEU1
bta-miR-27a-3p	NM_000434	612	619	98	ENSG00000227129	NEU1
bta-miR-27a-3p	NM_000434	612	619	98	ENSG00000223957	NEU1
bta-miR-27a-3p	NM_000434	612	619	98	ENSG00000234846	NEU1
bta-miR-27a-3p	NM_000434	612	619	98	ENSG00000184494	NEU1
bta-miR-27a-3p	NM_000434	612	619	98	ENSG00000227315	NEU1
bta-miR-27a-3p	NM_000434	612	619	98	ENSG00000204386	NEU1
bta-miR-27a-3p	NM_000434	612	619	98	ENSG00000228691	NEU1
bta-miR-185	NM_000436	154	161	97	ENSG00000083720	OXCT1
bta-miR-142-5p	NM_000436	1611	1618	95	ENSG00000083720	OXCT1
bta-miR-15b	NM_000441	226	233	95	ENSG00000091137	SLC26A4
bta-miR-147	NM_000452	511	518	95	ENSG00000125255	SLC10A2
bta-miR-2448-5p	NM_000455	593	600	96	ENSG00000118046	STK11
bta-miR-1249	NM_000457	120	127	96	ENSG00000101076	HNF4A
bta-miR-3-33975	NM_000459	686	693	96	ENSG00000120156	TEK
bta-miR-1842	NM_000459	582	589	95	ENSG00000120156	TEK
bta-miR-23-25873	NM_000480	1352	1359	95	ENSG00000133805	AMPD3
bta-miR-27a-3p	NM_000503	200	207	96	ENSG00000104313	EYA1
bta-miR-15b	NM_000503	1697	1704	98	ENSG00000104313	EYA1
bta-miR-2468	NM_000506	77	84	99	ENSG00000180210	F2
bta-miR-2457	NM_000508	478	485	95	ENSG00000171560	FGA
bta-miR-2284aa	NM_000509	23	29	97	ENSG00000171557	FGG
bta-miR-2284aa	NM_000514	2585	2592	98	ENSG00000168621	GDNF
bta-miR-23-25837	NM_000520	568	575	99	ENSG00000213614	HEXA
bta-miR-27a-3p	NM_000522	1205	1212	96	ENSG00000106031	HOXA13
bta-miR-2-20213	NM_000533	1963	1970	98	ENSG00000123560	PLP1
bta-miR-X-47796	NM_000533	1963	1970	98	ENSG00000123560	PLP1
bta-miR-2284v	NM_000533	1963	1970	98	ENSG00000123560	PLP1
bta-miR-23-25873	NM_000533	1891	1898	98	ENSG00000123560	PLP1
bta-miR-2285f	NM_000534	57	64	99	ENSG00000064933	PMS1
bta-miR-2284v	NM_000545	1113	1120	97	ENSG00000135100	HNF1A
bta-miR-2-20213	NM_000545	1113	1120	97	ENSG00000135100	HNF1A
bta-miR-X-47796	NM_000545	1113	1120	97	ENSG00000135100	HNF1A
bta-miR-21-3p	NM_000553	30	37	98	ENSG00000165392	WRN
bta-miR-2284w	NM_000553	608	614	97	ENSG00000165392	WRN
bta-miR-X-48475	NM_000553	189	196	97	ENSG00000165392	WRN
bta-miR-132	NM_000557	495	502	99	ENSG00000125965	GDF5
bta-miR-505	NM_000566	80	87	95	ENSG00000150337	FCGR1A
bta-miR-2284v	NM_000569	920	927	95	ENSG00000203747	FCGR3A
bta-miR-X-47796	NM_000569	920	927	95	ENSG00000203747	FCGR3A
bta-miR-2284w	NM_000569	896	903	97	ENSG00000203747	FCGR3A
bta-miR-2-20213	NM_000569	920	927	95	ENSG00000203747	FCGR3A
bta-miR-27a-5p	NM_000569	673	680	97	ENSG00000203747	FCGR3A
bta-miR-2284v	NM_000570	1032	1039	95	ENSG00000162747	FCGR3B
bta-miR-X-47796	NM_000570	1032	1039	95	ENSG00000162747	FCGR3B
bta-miR-2-20213	NM_000570	1032	1039	95	ENSG00000162747	FCGR3B
bta-miR-27a-5p	NM_000570	784	791	97	ENSG00000162747	FCGR3B
bta-miR-2284w	NM_000570	1008	1015	97	ENSG00000162747	FCGR3B
bta-miR-2285b	NM_000572	705	711	95	ENSG00000136634	IL10
bta-miR-2457	NM_000574	426	433	99	ENSG00000196352	CD55
bta-miR-223	NM_000575	1099	1106	97	ENSG00000115008	IL1A
bta-miR-2285b	NM_000578	369	376	95	ENSG00000018280	SLC11A1
bta-miR-2284w	NM_000579	1913	1920	99	ENSG00000160791	CCR5
bta-miR-10-2797	NM_000609	165	172	97	ENSG00000107562	CXCL12
bta-miR-10-2797	NM_000609	3158	3165	98	ENSG00000107562	CXCL12
bta-miR-21-3p	NM_000614	381	388	95	ENSG00000242689	CNTF
bta-miR-1842	NM_000617	22	29	98	ENSG00000110911	SLC11A2
bta-miR-15b	NM_000617	2085	2092	98	ENSG00000110911	SLC11A2
bta-miR-146a	NM_000617	279	286	98	ENSG00000110911	SLC11A2
bta-miR-X-47796	NM_000619	118	125	97	ENSG00000111537	IFNG
bta-miR-2284v	NM_000619	118	125	97	ENSG00000111537	IFNG
bta-miR-2-20213	NM_000619	118	125	97	ENSG00000111537	IFNG
bta-let-7i	NM_000627	813	820	99	ENSG00000049323	LTBP1
bta-miR-23-25873	NM_000627	819	826	98	ENSG00000049323	LTBP1
bta-miR-185	NM_000639	18	25	99	ENSG00000117560	FASLG
bta-miR-2457	NM_000641	916	923	96	ENSG00000095752	IL11
bta-miR-2284w	NM_000661	80	86	95	ENSG00000163682	RPL9
bta-miR-2484	NM_000663	2846	2853	95	ENSG00000183044	ABAT
bta-miR-27a-5p	NM_000668	1217	1224	99	ENSG00000196616	ADH1B
bta-miR-142-5p	NM_000672	169	176	96	ENSG00000172955	ADH6
bta-miR-27a-3p	NM_000676	316	323	98	ENSG00000170425	ADORA2B
bta-miR-1842	NM_000681	221	228	96	ENSG00000150594	ADRA2A
bta-miR-3-33975	NM_000682	1850	1857	97	ENSG00000274286	ADRA2B
bta-miR-X-48475	NM_000697	132	139	99	ENSG00000108839	ALOX12
bta-miR-142-5p	NM_000718	2256	2263	98	ENSG00000148408	CACNA1B
bta-miR-2468	NM_000719	38	45	98	ENSG00000151067	CACNA1C
bta-miR-1842	NM_000720	866	873	99	ENSG00000157388	CACNA1D
bta-miR-1842	NM_000723	1725	1732	95	ENSG00000067191	CACNB1
bta-miR-2284w	NM_000727	380	386	95	ENSG00000108878	CACNG1
bta-miR-185	NM_000742	104	111	97	ENSG00000120903	CHRNA2
bta-miR-223	NM_000743	1002	1009	99	ENSG00000080644	CHRNA3
bta-miR-27a-5p	NM_000760	71	78	97	ENSG00000119535	CSF3R
bta-miR-3-33975	NM_000765	393	400	99	ENSG00000160870	CYP3A7
bta-miR-2285f	NM_000765	392	398	96	ENSG00000160870	CYP3A7
bta-miR-2468	NM_000771	302	309	98	ENSG00000138109	CYP2C9
bta-miR-27a-3p	NM_000772	644	651	97	ENSG00000108242	CYP2C18
bta-miR-21-3p	NM_000775	260	267	99	ENSG00000134716	CYP2J2
bta-miR-2284aa	NM_000780	883	890	97	ENSG00000167910	CYP7A1
bta-miR-454	NM_000780	1046	1053	97	ENSG00000167910	CYP7A1
bta-miR-2285b	NM_000782	910	917	98	ENSG00000019186	CYP24A1
bta-miR-2285k	NM_000783	231	237	95	ENSG00000095596	CYP26A1
bta-miR-2284aa	NM_000788	1398	1405	98	ENSG00000156136	DCK
bta-miR-21-3p	NM_000791	41	48	99	ENSG00000228716	DHFR
bta-miR-15b	NM_000798	96	103	96	ENSG00000169676	DRD5
bta-miR-18a	NM_000800	3023	3030	99	ENSG00000113578	FGF1
bta-miR-142-3p	NM_000805	58	65	96	ENSG00000184502	GAST
bta-miR-18a	NM_000806	2393	2400	96	ENSG00000022355	GABRA1
bta-miR-23-25873	NM_000807	663	669	96	ENSG00000151834	GABRA2
bta-miR-18a	NM_000810	253	260	96	ENSG00000186297	GABRA5
bta-miR-505	NM_000811	341	348	95	ENSG00000145863	GABRA6
bta-miR-2457	NM_000816	1913	1920	98	ENSG00000113327	GABRG2
bta-miR-2484	NM_000816	1673	1680	97	ENSG00000113327	GABRG2
bta-miR-142-3p	NM_000817	77	84	97	ENSG00000128683	GAD1
bta-miR-1842	NM_000824	1196	1203	99	ENSG00000109738	GLRB
bta-miR-185	NM_000824	277	284	98	ENSG00000109738	GLRB
bta-miR-142-3p	NM_000826	323	330	95	ENSG00000120251	GRIA2
bta-miR-142-3p	NM_000827	86	93	98	ENSG00000155511	GRIA1
bta-miR-2285f	NM_000827	2580	2586	95	ENSG00000155511	GRIA1
bta-miR-223	NM_000829	583	590	95	ENSG00000152578	GRIA4
bta-miR-2484	NM_000833	9342	9349	97	ENSG00000183454	GRIN2A
bta-miR-X-48475	NM_000840	252	259	95	ENSG00000198822	GRM3
bta-miR-27a-3p	NM_000842	3352	3359	96	ENSG00000168959	GRM5
bta-miR-2284aa	NM_000844	1140	1146	97	ENSG00000196277	GRM7
bta-miR-2-20213	NM_000844	1139	1145	95	ENSG00000196277	GRM7
bta-miR-X-47796	NM_000844	1139	1145	95	ENSG00000196277	GRM7
bta-miR-2284v	NM_000844	1139	1145	95	ENSG00000196277	GRM7
bta-miR-2285b	NM_000847	152	159	95	ENSG00000174156	GSTA3
bta-miR-X-48475	NM_000851	719	726	97	ENSG00000134201	GSTM5
bta-miR-3-33975	NM_000857	426	433	95	ENSG00000061918	GUCY1B3
bta-miR-2285f	NM_000866	292	299	99	ENSG00000179097	HTR1F
bta-miR-142-5p	NM_000867	77	84	98	ENSG00000135914	HTR2B
bta-miR-1842	NM_000869	135	142	96	ENSG00000166736	HTR3A
bta-miR-2285k	NM_000870	302	309	96	ENSG00000164270	HTR4
bta-miR-2457	NM_000877	1186	1193	96	ENSG00000115594	IL1R1
bta-miR-2284aa	NM_000880	293	300	98	ENSG00000104432	IL7
bta-miR-23-25873	NM_000880	486	493	96	ENSG00000104432	IL7
bta-miR-2285f	NM_000899	4278	4284	95	ENSG00000049130	KITLG
bta-miR-27a-3p	NM_000899	182	189	98	ENSG00000049130	KITLG
bta-miR-X-47796	NM_000912	112	119	96	ENSG00000082556	OPRK1
bta-miR-18a	NM_000914	423	430	98	ENSG00000112038	OPRM1
bta-miR-132	NM_000916	2594	2601	95	ENSG00000180914	OXTR
bta-miR-2285q	NM_000917	652	659	98	ENSG00000122884	P4HA1
bta-miR-23-25873	NM_000921	30	37	99	ENSG00000172572	PDE3A
bta-miR-2285q	NM_000922	2184	2191	98	ENSG00000152270	PDE3B
bta-miR-21-3p	NM_000923	1694	1701	99	ENSG00000105650	PDE4C
bta-miR-2285b	NM_000925	111	117	96	ENSG00000168291	PDHB
bta-miR-2457	NM_000929	982	989	99	ENSG00000127472	PLA2G5
bta-let-7i	NM_000932	1615	1622	96	ENSG00000149782	PLCB3
bta-miR-X-47796	NM_000932	99	105	95	ENSG00000149782	PLCB3
bta-miR-2284v	NM_000932	99	105	96	ENSG00000149782	PLCB3
bta-miR-2-20213	NM_000932	99	105	96	ENSG00000149782	PLCB3
bta-miR-2284aa	NM_000932	100	107	99	ENSG00000149782	PLCB3
bta-miR-2284w	NM_000935	872	879	98	ENSG00000152952	PLOD2
bta-miR-2284aa	NM_000943	478	485	99	ENSG00000168938	PPIC
bta-miR-142-3p	NM_000949	8230	8237	95	ENSG00000113494	PRLR
bta-miR-27a-3p	NM_000953	1472	1479	97	ENSG00000168229	PTGDR
bta-miR-146a	NM_000965	681	688	98	ENSG00000077092	RARB
bta-miR-2285f	NM_000997	124	131	99	ENSG00000145592	RPL37
bta-miR-10a	NM_001001132	246	253	96	ENSG00000205726	ITSN1
bta-miR-132	NM_001001330	658	665	95	ENSG00000165476	REEP3
bta-miR-23-25873	NM_001001412	1452	1459	96	ENSG00000185933	CALHM1
bta-miR-3-33975	NM_001001419	4790	4797	99	ENSG00000113658	SMAD5
bta-miR-142-5p	NM_001001419	4863	4869	98	ENSG00000113658	SMAD5
bta-miR-3-33975	NM_001001420	4790	4797	99	ENSG00000113658	SMAD5
bta-miR-142-5p	NM_001001420	4863	4869	98	ENSG00000113658	SMAD5
bta-miR-146a	NM_001001481	3519	3526	99	ENSG00000104343	UBE2W
bta-miR-146a	NM_001001483	144	151	97	ENSG00000177054	ZDHHC13
bta-miR-2285f	NM_001001483	172	179	98	ENSG00000177054	ZDHHC13
bta-miR-10-2797	NM_001001484	2177	2184	97	ENSG00000165983	PTER
bta-miR-X-48475	NM_001001552	218	225	96	ENSG00000186007	LEMD1
bta-let-7i	NM_001001557	2069	2076	99	ENSG00000156466	GDF6
bta-miR-2285q	NM_001001669	2125	2132	96	ENSG00000183111	ARHGEF37
bta-miR-2284w	NM_001001701	104	111	95	ENSG00000164096	C4orf3
bta-miR-146a	NM_001001711	125	132	97	ENSG00000170967	DDI1
bta-miR-1842	NM_001001711	131	138	98	ENSG00000170967	DDI1
bta-miR-1842	NM_001001851	117	124	95	ENSG00000123243	ITIH5
bta-miR-18a	NM_001001890	487	494	96	ENSG00000159216	RUNX1
bta-miR-2284v	NM_001001933	222	228	95	ENSG00000162624	LHX8
bta-miR-2-20213	NM_001001933	222	228	95	ENSG00000162624	LHX8
bta-miR-2284aa	NM_001001933	223	229	97	ENSG00000162624	LHX8
bta-miR-27a-5p	NM_001001933	588	595	99	ENSG00000162624	LHX8
bta-miR-X-47796	NM_001001933	222	228	97	ENSG00000162624	LHX8
bta-miR-2285b	NM_001002010	222	228	96	ENSG00000122643	NT5C3A
bta-miR-21-3p	NM_001002032	20	26	95	ENSG00000189159	HN1
bta-miR-3-33975	NM_001002034	73	80	99	ENSG00000177096	FAM109B
bta-miR-3-33975	NM_001002257	3388	3395	98	ENSG00000172954	LCLAT1
bta-miR-2457	NM_001002258	19	25	96	ENSG00000154518	ATP5G3
bta-miR-27a-5p	NM_001002294	140	147	99	ENSG00000007933	FMO3
bta-miR-185	NM_001002295	855	862	98	ENSG00000107485	GATA3
bta-miR-142-5p	NM_001002296	1289	1296	98	ENSG00000147533	GOLGA7
bta-miR-2284v	NM_001002296	1373	1379	95	ENSG00000147533	GOLGA7
bta-miR-2285b	NM_001002296	1208	1215	98	ENSG00000147533	GOLGA7
bta-miR-23-25873	NM_001002800	261	268	96	ENSG00000113810	SMC4
bta-miR-10-2797	NM_001002838	4939	4946	95	ENSG00000196632	WNK3
bta-miR-X-47796	NM_001002843	1153	1160	99	ENSG00000137871	ZNF280D
bta-miR-2284v	NM_001002843	1153	1160	99	ENSG00000137871	ZNF280D
bta-miR-2457	NM_001002843	241	248	98	ENSG00000137871	ZNF280D
bta-miR-2-20213	NM_001002843	1153	1160	99	ENSG00000137871	ZNF280D
bta-miR-2284aa	NM_001002880	545	552	98	ENSG00000100211	CBY1
bta-miR-18a	NM_001002912	1987	1994	97	ENSG00000178965	ERICH3
bta-miR-27a-3p	NM_001002912	2142	2149	98	ENSG00000178965	ERICH3
bta-miR-454	NM_001003674	472	479	96	ENSG00000168675	LDLRAD4
bta-miR-454	NM_001003675	472	479	96	ENSG00000168675	LDLRAD4
bta-miR-10-2797	NM_001003679	406	413	97	ENSG00000116678	LEPR
bta-miR-3-33975	NM_001003681	95	102	98	ENSG00000100281	HMGXB4
bta-miR-2285f	NM_001003688	391	398	95	ENSG00000170365	SMAD1
bta-miR-2484	NM_001003696	79	85	95	ENSG00000154723	ATP5J
bta-miR-2484	NM_001003697	79	85	95	ENSG00000154723	ATP5J
bta-miR-15b	NM_001003698	2582	2589	96	ENSG00000124782	RREB1
bta-miR-15b	NM_001003699	2582	2589	96	ENSG00000124782	RREB1
bta-miR-15b	NM_001003700	2582	2589	96	ENSG00000124782	RREB1
bta-miR-2484	NM_001003701	79	85	95	ENSG00000154723	ATP5J
bta-miR-2484	NM_001003703	79	85	95	ENSG00000154723	ATP5J
bta-miR-142-5p	NM_001003712	3577	3584	96	ENSG00000091039	OSBPL8
bta-miR-10a	NM_001003786	479	486	96	ENSG00000266173	STRADA
bta-miR-10a	NM_001003787	479	486	96	ENSG00000266173	STRADA
bta-miR-10a	NM_001003788	479	486	96	ENSG00000266173	STRADA
bta-miR-146a	NM_001003810	168	175	98	ENSG00000138668	HNRNPD
bta-miR-2285f	NM_001003841	1196	1203	96	ENSG00000174358	SLC6A19
bta-miR-2284aa	NM_001004023	229	236	96	ENSG00000143479	DYRK3
bta-miR-132	NM_001004023	151	158	99	ENSG00000143479	DYRK3
bta-miR-X-48475	NM_001004055	46	53	95	ENSG00000125122	LRRC29
bta-miR-26-29659	NM_001004128	627	634	95	ENSG00000116260	QSOX1
bta-miR-26-29645	NM_001004128	627	634	95	ENSG00000116260	QSOX1
bta-miR-26-29663	NM_001004128	627	634	95	ENSG00000116260	QSOX1
bta-miR-454	NM_001004316	316	323	99	ENSG00000197980	LEKR1
bta-miR-132	NM_001004317	476	483	95	ENSG00000187772	LIN28B
bta-miR-23-25837	NM_001004317	47	54	96	ENSG00000187772	LIN28B
bta-let-7i	NM_001004317	42	49	97	ENSG00000187772	LIN28B
bta-miR-27a-3p	NM_001004317	117	124	97	ENSG00000187772	LIN28B
bta-miR-10a	NM_001004318	811	818	97	ENSG00000183760	ACP7
bta-miR-27a-3p	NM_001004329	1260	1267	98	ENSG00000185610	DBX2
bta-let-7i	NM_001004330	430	437	96	ENSG00000187510	PLEKHG7
bta-miR-21-3p	NM_001004339	44	51	98	ENSG00000203995	ZYG11A
bta-miR-505	NM_001004340	83	90	95	ENSG00000198019	FCGR1B
bta-miR-2457	NM_001004342	5048	5055	97	ENSG00000119283	TRIM67
bta-miR-2285q	NM_001004441	1293	1300	97	ENSG00000189127	ANKRD34B
bta-miR-142-3p	NM_001005241	149	155	95	ENSG00000183706	OR4N4
bta-miR-2285f	NM_001005271	1109	1116	99	ENSG00000170004	CHD3
bta-miR-2285f	NM_001005273	1109	1116	99	ENSG00000170004	CHD3
bta-miR-132	NM_001005291	1049	1055	96	ENSG00000072310	SREBF1
bta-miR-2284aa	NM_001005353	5420	5427	98	ENSG00000162433	AK4
bta-miR-185	NM_001005354	28	35	95	ENSG00000205352	PRR13
bta-miR-15b	NM_001005386	318	325	96	ENSG00000138071	ACTR2
bta-miR-2468	NM_001005386	1588	1595	95	ENSG00000138071	ACTR2
bta-miR-2285f	NM_001005386	2308	2314	95	ENSG00000138071	ACTR2
bta-miR-142-3p	NM_001005407	750	756	95	ENSG00000196557	CACNA1H
bta-miR-2284aa	NM_001005413	1029	1036	97	ENSG00000122952	ZWINT
bta-miR-1842	NM_001005464	49	56	98	ENSG00000203852	HIST2H3A
bta-miR-223	NM_001005476	540	547	98	ENSG00000144283	PKP4
bta-miR-185	NM_001005609	3390	3397	96	ENSG00000158813	EDA
bta-miR-185	NM_001005612	3390	3397	96	ENSG00000158813	EDA
bta-miR-142-5p	NM_001005739	328	335	97	ENSG00000143952	VPS54
bta-miR-27a-5p	NM_001005741	120	127	95	ENSG00000262446	GBA
bta-miR-27a-5p	NM_001005741	120	127	95	ENSG00000177628	GBA
bta-miR-27a-5p	NM_001005742	120	127	95	ENSG00000262446	GBA
bta-miR-27a-5p	NM_001005742	120	127	95	ENSG00000177628	GBA
bta-miR-146a	NM_001005743	623	630	95	ENSG00000133961	NUMB
bta-miR-146a	NM_001005744	623	630	95	ENSG00000133961	NUMB
bta-miR-146a	NM_001005745	623	630	95	ENSG00000133961	NUMB
bta-miR-2457	NM_001005751	483	490	99	ENSG00000099290	FAM21A
bta-miR-2468	NM_001005782	308	315	96	ENSG00000116030	SUMO1
bta-miR-142-5p	NM_001005861	149	156	96	ENSG00000163785	RYK
bta-miR-505	NM_001006612	28	35	98	ENSG00000185222	TCEAL9
bta-miR-505	NM_001006613	28	35	98	ENSG00000185222	TCEAL9
bta-miR-505	NM_001006614	28	35	98	ENSG00000185222	TCEAL9
bta-miR-132	NM_001006618	265	271	96	ENSG00000119487	MAPKAP1
bta-miR-146a	NM_001006622	46	53	97	ENSG00000136709	WDR33
bta-miR-27a-3p	NM_001006624	1653	1660	99	ENSG00000162493	PDPN
bta-miR-27a-3p	NM_001006625	1653	1660	99	ENSG00000162493	PDPN
bta-miR-1842	NM_001006636	138	145	97	ENSG00000121964	GTDC1
bta-miR-23-25873	NM_001006636	685	692	97	ENSG00000121964	GTDC1
bta-miR-3-33975	NM_001006655	239	246	96	ENSG00000109794	FAM149A
bta-let-7i	NM_001006656	296	303	97	ENSG00000142528	ZNF473
bta-miR-3-33975	NM_001006932	2495	2501	95	ENSG00000071242	RPS6KA2
bta-miR-2284aa	NM_001006935	351	358	99	ENSG00000133142	TCEAL4
bta-miR-2284aa	NM_001006937	351	358	99	ENSG00000133142	TCEAL4
bta-miR-2284w	NM_001006939	303	310	99	ENSG00000165383	LRRC18
bta-miR-2284aa	NM_001006945	725	732	99	ENSG00000121931	LRIF1
bta-miR-2285b	NM_001007024	2672	2678	97	ENSG00000108587	GOSR1
bta-miR-2285f	NM_001007024	2739	2746	98	ENSG00000108587	GOSR1
bta-miR-2284aa	NM_001007024	2700	2707	98	ENSG00000108587	GOSR1
bta-miR-2284aa	NM_001007025	2700	2707	98	ENSG00000108587	GOSR1
bta-miR-2285b	NM_001007025	2672	2678	97	ENSG00000108587	GOSR1
bta-miR-2285f	NM_001007025	2739	2746	98	ENSG00000108587	GOSR1
bta-miR-2285b	NM_001007090	88	95	98	ENSG00000164743	C8orf48
bta-miR-2285b	NM_001007189	96	103	99	ENSG00000182700	IGIP
bta-miR-2468	NM_001007214	345	352	95	ENSG00000116161	CACYBP
bta-let-7i	NM_001007225	1252	1259	95	ENSG00000073792	IGF2BP2
bta-miR-X-48475	NM_001007226	1141	1148	98	ENSG00000121067	SPOP
bta-miR-X-48475	NM_001007227	1141	1148	98	ENSG00000121067	SPOP
bta-miR-X-48475	NM_001007228	1141	1148	98	ENSG00000121067	SPOP
bta-miR-X-48475	NM_001007229	1141	1148	98	ENSG00000121067	SPOP
bta-miR-X-48475	NM_001007230	1141	1148	98	ENSG00000121067	SPOP
bta-miR-15b	NM_001007231	55	62	97	ENSG00000163219	ARHGAP25
bta-miR-454	NM_001007237	2882	2889	99	ENSG00000143061	IGSF3
bta-miR-2285b	NM_001007248	732	739	96	ENSG00000153896	ZNF599
bta-miR-X-47796	NM_001007267	844	851	97	ENSG00000153246	PLA2R1
bta-miR-2448-5p	NM_001007267	63	70	99	ENSG00000153246	PLA2R1
bta-miR-2284v	NM_001007267	844	851	97	ENSG00000153246	PLA2R1
bta-miR-2-20213	NM_001007267	844	851	97	ENSG00000153246	PLA2R1
bta-miR-142-5p	NM_001007267	860	867	98	ENSG00000153246	PLA2R1
bta-let-7i	NM_001007269	217	224	95	ENSG00000142252	GEMIN7
bta-let-7i	NM_001007270	217	224	95	ENSG00000142252	GEMIN7
bta-miR-2284aa	NM_001007533	182	189	95	ENSG00000182676	PPP1R27
bta-miR-2468	NM_001007533	207	214	96	ENSG00000182676	PPP1R27
bta-miR-2284aa	NM_001007533	164	170	96	ENSG00000182676	PPP1R27
bta-miR-2457	NM_001007538	1472	1479	99	ENSG00000180730	SHISA2
bta-miR-132	NM_001007553	323	330	97	ENSG00000009307	CSDE1
bta-miR-2-20213	NM_001007794	115	122	98	ENSG00000134255	CEPT1
bta-miR-X-47796	NM_001007794	115	122	98	ENSG00000134255	CEPT1
bta-miR-2284v	NM_001007794	115	122	98	ENSG00000134255	CEPT1
bta-miR-23-25837	NM_001008211	83	90	99	ENSG00000123240	OPTN
bta-miR-142-5p	NM_001008211	964	971	99	ENSG00000123240	OPTN
bta-miR-2285b	NM_001008211	372	379	95	ENSG00000123240	OPTN
bta-miR-142-5p	NM_001008212	964	971	99	ENSG00000123240	OPTN
bta-miR-2285b	NM_001008212	372	379	95	ENSG00000123240	OPTN
bta-miR-23-25837	NM_001008212	83	90	99	ENSG00000123240	OPTN
bta-miR-2285b	NM_001008213	372	379	95	ENSG00000123240	OPTN
bta-miR-142-5p	NM_001008213	964	971	99	ENSG00000123240	OPTN
bta-miR-23-25837	NM_001008213	83	90	99	ENSG00000123240	OPTN
bta-miR-X-47796	NM_001008215	1299	1306	96	ENSG00000183513	COA5
bta-miR-2284v	NM_001008215	1299	1306	96	ENSG00000183513	COA5
bta-miR-2-20213	NM_001008215	1299	1306	96	ENSG00000183513	COA5
bta-miR-27a-5p	NM_001008220	256	263	95	ENSG00000145920	CPLX2
bta-miR-185	NM_001008220	237	244	95	ENSG00000145920	CPLX2
bta-miR-223	NM_001008222	137	144	98	ENSG00000188706	ZDHHC9
bta-miR-2285f	NM_001008388	2667	2674	95	ENSG00000145354	CISD2
bta-miR-2285k	NM_001008390	3288	3295	96	ENSG00000163320	CGGBP1
bta-miR-3-33975	NM_001008391	703	709	97	ENSG00000186714	CCDC73
bta-miR-23-25837	NM_001008394	202	209	98	ENSG00000255150	EID3
bta-miR-505	NM_001008396	2469	2476	97	ENSG00000198554	WDHD1
bta-miR-505	NM_001008405	145	152	99	ENSG00000075790	BCAP29
bta-miR-1842	NM_001008410	1922	1929	95	ENSG00000115107	STEAP3
bta-miR-27a-5p	NM_001008491	1313	1320	96	ENSG00000168385	2002-09-01
bta-miR-15b	NM_001008491	489	496	98	ENSG00000168385	2002-09-01
bta-miR-15b	NM_001008492	489	496	98	ENSG00000168385	2002-09-01
bta-miR-27a-5p	NM_001008492	1313	1320	96	ENSG00000168385	2002-09-01
bta-miR-10-2797	NM_001008528	132	139	98	ENSG00000182534	MXRA7
bta-miR-X-48475	NM_001008529	1208	1215	98	ENSG00000182534	MXRA7
bta-miR-505	NM_001008537	44	51	97	ENSG00000050030	KIAA2022
bta-miR-185	NM_001008540	316	323	98	ENSG00000121966	CXCR4
bta-miR-2284aa	NM_001008540	25	31	96	ENSG00000121966	CXCR4
bta-miR-142-5p	NM_001008661	234	241	99	ENSG00000137944	KYAT3
bta-miR-142-5p	NM_001008662	234	241	99	ENSG00000137944	KYAT3
bta-miR-185	NM_001008708	592	598	97	ENSG00000143942	CHAC2
bta-miR-3-33975	NM_001008726	25	32	98	ENSG00000140006	WDR89
bta-miR-185	NM_001008726	895	902	99	ENSG00000140006	WDR89
bta-miR-2284aa	NM_001008726	363	370	96	ENSG00000140006	WDR89
bta-miR-2284w	NM_001008777	136	143	98	ENSG00000204952	FBXO47
bta-miR-1842	NM_001008800	27	34	97	ENSG00000163468	CCT3
bta-miR-185	NM_001008860	1151	1158	99	ENSG00000140157	NIPA2
bta-miR-185	NM_001008892	1151	1158	99	ENSG00000140157	NIPA2
bta-miR-185	NM_001008894	1151	1158	99	ENSG00000140157	NIPA2
bta-miR-10-2797	NM_001009185	35	42	98	ENSG00000164398	ACSL6
bta-miR-454	NM_001009555	72	79	99	ENSG00000109686	SH3D19
bta-miR-2285k	NM_001009880	417	424	95	ENSG00000100364	KIAA0930
bta-miR-X-47796	NM_001009881	490	496	97	ENSG00000134744	ZCCHC11
bta-miR-132	NM_001009881	185	191	96	ENSG00000134744	ZCCHC11
bta-miR-2284v	NM_001009881	490	496	97	ENSG00000134744	ZCCHC11
bta-miR-2284aa	NM_001009881	491	498	99	ENSG00000134744	ZCCHC11
bta-miR-2-20213	NM_001009881	490	496	97	ENSG00000134744	ZCCHC11
bta-miR-142-5p	NM_001009881	398	405	96	ENSG00000134744	ZCCHC11
bta-miR-505	NM_001009899	353	360	96	ENSG00000176542	USF3
bta-miR-142-5p	NM_001009909	121	128	97	ENSG00000187398	LUZP2
bta-miR-27a-5p	NM_001009923	41	48	98	ENSG00000089063	TMEM230
bta-miR-505	NM_001009923	784	791	95	ENSG00000089063	TMEM230
bta-miR-505	NM_001009924	784	791	95	ENSG00000089063	TMEM230
bta-miR-27a-5p	NM_001009924	41	48	98	ENSG00000089063	TMEM230
bta-miR-505	NM_001009925	784	791	95	ENSG00000089063	TMEM230
bta-miR-27a-5p	NM_001009925	41	48	98	ENSG00000089063	TMEM230
bta-miR-1842	NM_001009932	960	967	99	ENSG00000013563	DNASE1L1
bta-miR-1842	NM_001009933	960	967	99	ENSG00000013563	DNASE1L1
bta-miR-1842	NM_001009934	960	967	99	ENSG00000013563	DNASE1L1
bta-miR-23-25837	NM_001009955	177	184	97	ENSG00000157216	SSBP3
bta-miR-2285b	NM_001009993	4344	4351	98	ENSG00000152102	FAM168B
bta-miR-2284aa	NM_001010844	51	58	98	ENSG00000146243	IRAK1BP1
bta-miR-10-2797	NM_001010852	108	115	99	ENSG00000146352	CLVS2
bta-miR-2284v	NM_001010854	713	719	96	ENSG00000165914	TTC7B
bta-miR-X-47796	NM_001010854	713	719	95	ENSG00000165914	TTC7B
bta-miR-2448-5p	NM_001010854	383	390	99	ENSG00000165914	TTC7B
bta-miR-23-25873	NM_001010854	731	737	97	ENSG00000165914	TTC7B
bta-miR-2284aa	NM_001010854	714	720	97	ENSG00000165914	TTC7B
bta-miR-2-20213	NM_001010854	713	719	96	ENSG00000165914	TTC7B
bta-miR-2457	NM_001010862	395	402	97	ENSG00000204271	SPIN3
bta-miR-27a-3p	NM_001010870	2447	2454	99	ENSG00000180113	TDRD6
bta-miR-3-33975	NM_001010888	4131	4138	98	ENSG00000102053	ZC3H12B
bta-let-7i	NM_001010895	41	48	99	ENSG00000182150	ERCC6L2
bta-miR-2285b	NM_001010906	49	56	99	ENSG00000189233	NUGGC
bta-miR-2284v	NM_001010911	84	91	97	ENSG00000204682	CASC10
bta-miR-2-20213	NM_001010911	84	91	97	ENSG00000204682	CASC10
bta-miR-X-47796	NM_001010911	84	91	97	ENSG00000204682	CASC10
bta-miR-2284v	NM_001010923	1226	1233	96	ENSG00000275122	THEMIS
bta-miR-2284v	NM_001010923	1226	1233	96	ENSG00000172673	THEMIS
bta-miR-2-20213	NM_001010923	1226	1233	96	ENSG00000275122	THEMIS
bta-miR-2-20213	NM_001010923	1226	1233	96	ENSG00000172673	THEMIS
bta-miR-X-47796	NM_001010923	1226	1233	96	ENSG00000275122	THEMIS
bta-miR-X-47796	NM_001010923	1226	1233	96	ENSG00000172673	THEMIS
bta-miR-2284w	NM_001010924	1277	1283	95	ENSG00000148468	FAM171A1
bta-miR-X-47796	NM_001010935	1055	1062	95	ENSG00000116473	RAP1A
bta-miR-2-20213	NM_001010935	1055	1062	95	ENSG00000116473	RAP1A
bta-miR-2284v	NM_001010935	1055	1062	95	ENSG00000116473	RAP1A
bta-miR-2285f	NM_001010942	893	900	96	ENSG00000127314	RAP1B
bta-miR-146a	NM_001010977	219	226	98	ENSG00000139780	METTL21C
bta-miR-505	NM_001010986	2262	2269	97	ENSG00000101974	ATP11C
bta-miR-142-5p	NM_001010989	420	427	98	ENSG00000051108	HERPUD1
bta-miR-2284v	NM_001011513	236	243	98	ENSG00000163110	PDLIM5
bta-miR-2-20213	NM_001011513	236	243	98	ENSG00000163110	PDLIM5
bta-miR-X-47796	NM_001011513	236	243	98	ENSG00000163110	PDLIM5
bta-miR-10a	NM_001011515	790	797	99	ENSG00000163110	PDLIM5
bta-miR-10a	NM_001011516	790	797	99	ENSG00000163110	PDLIM5
bta-miR-3-33975	NM_001011548	457	464	95	ENSG00000147381	MAGEA4
bta-miR-3-33975	NM_001011549	457	464	95	ENSG00000147381	MAGEA4
bta-miR-3-33975	NM_001011550	457	464	95	ENSG00000147381	MAGEA4
bta-miR-2-20213	NM_001011551	417	424	95	ENSG00000171155	C1GALT1C1
bta-miR-2284v	NM_001011551	417	424	95	ENSG00000171155	C1GALT1C1
bta-miR-X-47796	NM_001011551	417	424	95	ENSG00000171155	C1GALT1C1
bta-miR-2285f	NM_001011655	740	747	95	ENSG00000145014	TMEM44
bta-miR-2285b	NM_001011708	2099	2105	95	ENSG00000138430	OLA1
bta-miR-2284aa	NM_001011708	47	53	98	ENSG00000138430	OLA1
bta-miR-3-33975	NM_001011713	446	453	97	ENSG00000139977	NAA30
bta-miR-146a	NM_001012241	241	248	97	ENSG00000188895	MSL1
bta-miR-3-33975	NM_001012264	782	789	99	ENSG00000206150	RNASE13
[truncated: 10,005 more rows]
