# Supplementary material for: Co-Expression Network and Pathway Analyses Reveal Important Modules of miRNAs Regulating Milk Yield and Component Traits
Source: Int J Mol Sci. 2017 Jul 18;18(7):1560. doi: 10.3390/ijms18071560 (PMC5536048; doi:10.3390/ijms18071560)
Supplement: Supplementary file 1 [file ijms-18-01560-s001.zip › Table S2new. Gene ontology for all modules .xlsx]

## Sheet: Table S2a_BLUE MODULE 
Table S2a: Gene ontologies enriched for target genes of miRNAs in the BLUE module
GOID	GOTerm	Ontology Source	Term PValue	Term PValue Corrected with Benjamini-Hochberg	Associated Genes Found
GO:0007606	sensory perception of chemical stimulus	GO_BiologicalProcess	8e-18	1.6e-14	[ADCY3, BBS4, CD36, CNGB1, FFAR4, OR4N4, OR51E1, PTCH1, RTP4, TAS2R20, UBR3]
GO:0050906	detection of stimulus involved in sensory perception	GO_BiologicalProcess	1.1e-13	7.9e-11	[ANO1, CNGB1, EYS, FFAR4, GRIN2B, KIT, NR2F6, OR4N4, OR51E1, PCDH15, PIEZO2, PTCH1, PTPRQ, PTPRR, RTP4, SEMA5B, TAS2R20]
GO:0044260	cellular macromolecule metabolic process	GO_BiologicalProcess	2e-07	5.7e-05	[A1CF, A4GALT, AAR2, AARS2, ABCA1, ABHD14B, ACTN1, ACVRL1, ADAM17, ADARB2, ADCY3, ADCY7, ADORA2B, AES, AFF1, AFF3, AFF4, AGBL3, AGGF1, AGL, AGO3, AGO4, AHI1, AIDA, AIF1, AKAP1, ALG1, ALG10, ALG10B, ALG9, ALPK1, ALS2, ANAPC1, ANAPC16, ANK3, ANKRD13C, ANKRD28, ANKZF1, AP1AR, APBB2, APOBEC2, APOBEC3A, APOBEC3G, APOBEC3H, AQR, ARFGEF1, ARFGEF2, ARHGEF7, ARID1A, ARID4A, ARID4B, ARID5B, ARMT1, ARNTL, A…
GO:0045934	negative regulation of nucleobase-containing compound metabolic process	GO_BiologicalProcess	9.2e-07	0.00018	[ACVRL1, AES, APOBEC3G, APOBEC3H, APOC3, ARID1A, ARID4A, ARID5B, ARNTL, ASXL2, ATAD2B, ATXN1, BACH1, BEND3, BMP7, BMPR2, BPTF, BRMS1, BTG2, C1QBP, CASP8AP2, CBX8, CBY1, CD36, CD38, CDC45, CDKN1B, CDKN2A, CEBPG, CELA1, CIPC, CIR1, CNOT2, CREB1, CREBZF, CTNNB1, CUX1, CUX2, DDX5, DDX54, DFFA, DICER1, DLL4, DMRT1, DNAJB5, DR1, DUSP26, EDNRA, EN1, ENO1, EOMES, EP300, ERCC4, ESR1, ETV3, FGFR3, FHL2, FO…
GO:1903507	negative regulation of nucleic acid-templated transcription	GO_BiologicalProcess	1.1e-06	0.00021	[AES, ARID1A, ARID4A, ARID5B, ARNTL, ASXL2, ATAD2B, ATXN1, BACH1, BEND3, BMP7, BPTF, BRMS1, BTG2, C1QBP, CASP8AP2, CBX8, CBY1, CD36, CD38, CDC45, CDKN1B, CDKN2A, CEBPG, CELA1, CIPC, CIR1, CNOT2, CREB1, CREBZF, CTNNB1, CUX1, CUX2, DDX5, DDX54, DICER1, DLL4, DMRT1, DNAJB5, DR1, DUSP26, EN1, ENO1, EOMES, EP300, ESR1, ETV3, FGFR3, FHL2, FOXA2, FOXE1, FOXP2, FST, GCFC2, GCLC, GLYAT, HDAC7, HDAC9, HES2…
GO:0045892	negative regulation of transcription, DNA-templated	GO_BiologicalProcess	1.5e-06	0.00025	[AES, ARID1A, ARID4A, ARID5B, ARNTL, ASXL2, ATAD2B, ATXN1, BACH1, BEND3, BMP7, BPTF, BRMS1, BTG2, C1QBP, CBX8, CBY1, CD36, CD38, CDC45, CDKN1B, CDKN2A, CEBPG, CELA1, CIPC, CIR1, CNOT2, CREB1, CREBZF, CTNNB1, CUX1, CUX2, DDX5, DICER1, DLL4, DMRT1, DNAJB5, DR1, DUSP26, EN1, ENO1, EOMES, EP300, ESR1, ETV3, FGFR3, FHL2, FOXA2, FOXE1, FOXP2, FST, GCFC2, GCLC, GLYAT, HDAC7, HDAC9, HES2, HEXIM2, HFE2, H…
GO:0031327	negative regulation of cellular biosynthetic process	GO_BiologicalProcess	1.8e-06	0.00028	[ACVRL1, AES, AGO3, AGO4, APOC3, ARID1A, ARID4A, ARID5B, ARNTL, ASXL2, ATAD2B, ATXN1, BACE2, BACH1, BEND3, BMP7, BMPR2, BPTF, BRMS1, BTG2, C1QBP, CASP8AP2, CBX8, CBY1, CD36, CD38, CDC45, CDKN1B, CDKN2A, CEBPG, CELA1, CIPC, CIR1, CNOT2, CREB1, CREBZF, CTNNB1, CUX1, CUX2, DDX3X, DDX5, DDX54, DICER1, DLL4, DMRT1, DNAJB5, DR1, DUSP26, EDNRA, EIF2AK2, EIF2AK3, EN1, ENC1, ENO1, EOMES, EP300, ERLIN1, ER…
GO:0051172	negative regulation of nitrogen compound metabolic process	GO_BiologicalProcess	2.7e-06	0.00037	[ACVRL1, AES, AGO3, AGO4, APOBEC3G, APOBEC3H, APOC3, ARID1A, ARID4A, ARID5B, ARNTL, ASXL2, ATAD2B, ATXN1, BACH1, BEND3, BMP7, BMPR2, BPTF, BRMS1, BTG2, C1QBP, CASP8AP2, CBX8, CBY1, CD36, CD38, CDC45, CDKN1B, CDKN2A, CEBPG, CELA1, CIPC, CIR1, CNOT2, CREB1, CREBZF, CTNNB1, CUX1, CUX2, DDX3X, DDX5, DDX54, DFFA, DICER1, DLL4, DMRT1, DNAJB5, DR1, DUSP26, EDNRA, EIF2AK2, EIF2AK3, EN1, ENC1, ENO1, EOMES…
GO:0009890	negative regulation of biosynthetic process	GO_BiologicalProcess	2.7e-06	0.00039	[ACVRL1, AES, AGO3, AGO4, APOC3, ARID1A, ARID4A, ARID5B, ARNTL, ASXL2, ATAD2B, ATXN1, BACE2, BACH1, BEND3, BMP7, BMPR2, BPTF, BRMS1, BTG2, C1QBP, CASP8AP2, CBX8, CBY1, CD36, CD38, CDC45, CDKN1B, CDKN2A, CEBPG, CELA1, CIPC, CIR1, CNOT2, CREB1, CREBZF, CTNNB1, CUX1, CUX2, DDX3X, DDX5, DDX54, DICER1, DLL4, DMRT1, DNAJB5, DR1, DUSP26, EDNRA, EIF2AK2, EIF2AK3, EN1, ENC1, ENO1, EOMES, EP300, ERLIN1, ER…
GO:2000113	negative regulation of cellular macromolecule biosynthetic process	GO_BiologicalProcess	3.1e-06	0.00039	[ACVRL1, AES, AGO3, AGO4, ARID1A, ARID4A, ARID5B, ARNTL, ASXL2, ATAD2B, ATXN1, BACE2, BACH1, BEND3, BMP7, BMPR2, BPTF, BRMS1, BTG2, C1QBP, CBX8, CBY1, CD36, CD38, CDC45, CDKN1B, CDKN2A, CEBPG, CELA1, CIPC, CIR1, CNOT2, CREB1, CREBZF, CTNNB1, CUX1, CUX2, DDX3X, DDX5, DICER1, DLL4, DMRT1, DNAJB5, DR1, DUSP26, EIF2AK2, EIF2AK3, EN1, ENC1, ENO1, EOMES, EP300, ESR1, ETV3, FGFR3, FHL2, FOXA2, FOXE1, FO…
GO:0051253	negative regulation of RNA metabolic process	GO_BiologicalProcess	3.7e-06	0.00043	[AES, APOBEC3G, APOBEC3H, ARID1A, ARID4A, ARID5B, ARNTL, ASXL2, ATAD2B, ATXN1, BACH1, BEND3, BMP7, BPTF, BRMS1, BTG2, C1QBP, CASP8AP2, CBX8, CBY1, CD36, CD38, CDC45, CDKN1B, CDKN2A, CEBPG, CELA1, CIPC, CIR1, CNOT2, CREB1, CREBZF, CTNNB1, CUX1, CUX2, DDX5, DDX54, DICER1, DLL4, DMRT1, DNAJB5, DR1, DUSP26, EN1, ENO1, EOMES, EP300, ESR1, ETV3, FGFR3, FHL2, FOXA2, FOXE1, FOXP2, FST, GCFC2, GCLC, GLYAT…
GO:0010558	negative regulation of macromolecule biosynthetic process	GO_BiologicalProcess	8.9e-06	0.00085	[ACVRL1, AES, AGO3, AGO4, ARID1A, ARID4A, ARID5B, ARNTL, ASXL2, ATAD2B, ATXN1, BACE2, BACH1, BEND3, BMP7, BMPR2, BPTF, BRMS1, BTG2, C1QBP, CASP8AP2, CBX8, CBY1, CD36, CD38, CDC45, CDKN1B, CDKN2A, CEBPG, CELA1, CIPC, CIR1, CNOT2, CREB1, CREBZF, CTNNB1, CUX1, CUX2, DDX3X, DDX5, DDX54, DICER1, DLL4, DMRT1, DNAJB5, DR1, DUSP26, EIF2AK2, EIF2AK3, EN1, ENC1, ENO1, EOMES, EP300, ESR1, ETV3, FGFR3, FHL2,…
GO:0031323	regulation of cellular metabolic process	GO_BiologicalProcess	1.4e-05	0.0011	[ABCA1, ABHD14B, ABHD5, ACSL3, ACTN1, ACVRL1, ADAM17, ADCY3, ADCY7, ADORA2B, AES, AFF1, AFF3, AFF4, AGO3, AGO4, AGPAT1, AHI1, AIDA, AIF1, AKAP1, ALS2, ANAPC1, ANAPC16, ANKRD13C, AP1AR, APBB2, APOBEC3G, APOBEC3H, APOC3, ARFGEF1, ARHGEF7, ARID1A, ARID4A, ARID4B, ARID5B, ARNTL, ARRDC4, ASCL4, ASXL2, ATAD2B, ATG14, ATG5, ATXN1, AZIN1, BACE2, BACH1, BAK1, BBX, BCL2L11, BEND3, BEX2, BMP7, BMPR2, BNIP3,…
GO:0007186	G-protein coupled receptor signaling pathway	GO_BiologicalProcess	1.4e-05	0.0012	[ABCA1, ADAM17, ADCY3, ADCY7, ADGRE5, ADGRL2, ADORA2B, AKR1C2, ANO1, APOC3, CACNA1D, CCL18, CCR4, CHRM1, CHRM2, CNGA1, CNGB1, CORT, CXCL11, CXCL12, CXCL13, CXCR2, CXCR3, CXCR5, CYSLTR2, DGKB, DGKG, DHX15, EDNRA, ESR1, F2RL2, FFAR4, FNTB, FSHR, FZD10, GABRA2, GABRG2, GAP43, GIPC1, GLP1R, GLRA3, GLRB, GNA12, GNG7, GNGT2, GPNMB, GPR132, GPR146, GPR37, GPR61, GPR68, GPR82, GPR85, GPRC5A, GPSM2, HOMER…
GO:0034645	cellular macromolecule biosynthetic process	GO_BiologicalProcess	1.9e-05	0.0014	[A4GALT, AARS2, ABCA1, ABHD14B, ACVRL1, AES, AFF1, AFF3, AFF4, AGL, AGO3, AGO4, AHI1, ALG1, ALG10, ALG10B, ALG9, ANK3, ANKRD28, APBB2, ARFGEF1, ARHGEF7, ARID1A, ARID4A, ARID4B, ARID5B, ARNTL, ASCL4, ASXL2, ATAD2B, ATG4A, ATG4C, ATG4D, ATG5, ATXN1, B3GNT5, B4GALT4, BACE2, BACH1, BBX, BEND3, BET1, BEX2, BMP7, BMPR2, BOLL, BPTF, BRMS1, BRWD3, BTF3, BTG2, BZW1, C1GALT1, C1QBP, CAMK4, CAND1, CARS, CAS…
GO:0007600	sensory perception	GO_BiologicalProcess	2.5e-05	0.0016	[ABCC6, ADCY3, ANO1, BBS4, BBS5, BBS9, CACNA1D, CACNB2, CD36, CDH23, CDKN1B, CLIC5, CNGA1, CNGB1, CNGB3, CNTN5, DLL4, EDNRA, EYA1, EYS, FAM161A, FAM65B, FFAR4, FXN, GLRB, GRIN2B, HOXB8, IFNG, IRX5, KCNMA1, KIT, LMNB2, LRIG2, METAP1, MPZ, MTOR, MYO15A, MYO6, NDP, NR2E3, NR2F6, OPA3, OPN4, OPN5, OPRM1, OR4N4, OR51E1, OTOGL, P2RX4, P2RY1, PAX3, PCDH15, PDC, PDCL, PENK, PIEZO2, PTCH1, PTPRQ, PTPRR, R…
GO:0009059	macromolecule biosynthetic process	GO_BiologicalProcess	2.5e-05	0.0016	[A4GALT, AARS2, ABCA1, ABHD14B, ACTN1, ACVRL1, AES, AFF1, AFF3, AFF4, AGL, AGO3, AGO4, AHI1, ALG1, ALG10, ALG10B, ALG9, ANK3, ANKRD13C, ANKRD28, APBB2, ARFGEF1, ARHGEF7, ARID1A, ARID4A, ARID4B, ARID5B, ARNTL, ASCL4, ASXL2, ATAD2B, ATG4A, ATG4C, ATG4D, ATG5, ATXN1, B3GNT5, B4GALT4, BACE2, BACH1, BBX, BEND3, BET1, BEX2, BMP7, BMPR2, BOLL, BPTF, BRMS1, BRWD3, BTF3, BTG2, BZW1, C1GALT1, C1QBP, CAMK4,…
GO:0019219	regulation of nucleobase-containing compound metabolic process	GO_BiologicalProcess	3.4e-05	0.002	[ABCA1, ABHD14B, ACTN1, ACVRL1, ADCY7, ADORA2B, AES, AFF1, AFF3, AFF4, AHI1, APBB2, APOBEC3G, APOBEC3H, APOC3, ARHGEF7, ARID1A, ARID4A, ARID4B, ARID5B, ARNTL, ASCL4, ASXL2, ATAD2B, ATXN1, BACH1, BAK1, BBX, BEND3, BEX2, BMP7, BMPR2, BPGM, BPTF, BRMS1, BRWD3, BTF3, BTG2, BZW1, C1QBP, CALM3, CAMK4, CAND1, CASP8AP2, CBL, CBX8, CBY1, CCNC, CCNH, CCNK, CCT3, CD36, CD38, CD80, CDC45, CDCA7, CDCA7L, CDK1…
GO:0030154	cell differentiation	GO_BiologicalProcess	3.2e-05	0.002	[A4GALT, AACS, ABCA1, ABCB5, ABHD5, ACTN1, ACVRL1, ADAM12, ADAM17, AFF4, AGFG1, AGGF1, AGPAT5, AHI1, AKR1C2, ALDH6A1, ALOX15B, ALS2, ANK3, AP1AR, APBB2, AQP3, ARFGEF1, ARHGEF7, ARID1A, ARID4A, ARID4B, ARID5B, ARL13B, ARNTL, ARSB, ASB2, ASTN1, ASXL2, ATG5, ATP11C, ATXN1, AVIL, AZI2, BAK1, BBS4, BBS9, BCAP29, BCL2L11, BCL7B, BDH2, BEX2, BMP7, BMPR2, BNIP3, BOLL, BRAF, BTG2, BZW2, C11orf88, C1GALT1,…
GO:0006139	nucleobase-containing compound metabolic process	GO_BiologicalProcess	3.8e-05	0.0021	[A1CF, AAR2, AARS2, ABCA1, ABHD14B, ACTN1, ACVRL1, ADARB2, ADCY3, ADCY7, ADORA2B, ADSSL1, AES, AFF1, AFF3, AFF4, AGGF1, AGO3, AGO4, AHCY, AHI1, AK2, AK5, ALDH6A1, APBB2, APOBEC2, APOBEC3A, APOBEC3G, APOBEC3H, APOC3, AQR, ARHGEF7, ARID1A, ARID4A, ARID4B, ARID5B, ARNTL, ASCL4, ASXL2, ATAD2B, ATG5, ATP5G3, ATP6V0A1, ATP6V1A, ATXN1, BACH1, BAK1, BBX, BEND3, BEX2, BHMT2, BMP7, BMPR2, BPGM, BPTF, BRMS1…
GO:0060255	regulation of macromolecule metabolic process	GO_BiologicalProcess	3.6e-05	0.0021	[A1CF, ABHD14B, ACTN1, ACVRL1, ADAM17, ADCY3, ADCY7, ADORA2B, AES, AFF1, AFF3, AFF4, AGO3, AGO4, AHI1, AIDA, AIF1, AKAP1, ALS2, ANAPC1, ANAPC16, ANGEL2, ANK3, ANKRD13C, AP1AR, APBB2, APOBEC3G, APOBEC3H, ARFGEF1, ARHGEF7, ARID1A, ARID4A, ARID4B, ARID5B, ARNTL, ARRDC4, ASCL4, ASXL2, ATAD2B, ATG14, ATG5, ATXN1, AZIN1, BACE2, BACH1, BAK1, BBS4, BBX, BCL2L11, BEND3, BEX2, BMP7, BMPR2, BOLL, BPGM, BPTF…
GO:0010629	negative regulation of gene expression	GO_BiologicalProcess	3.8e-05	0.0022	[AES, AGO3, AGO4, AIF1, ARID1A, ARID4A, ARID4B, ARID5B, ARNTL, ASXL2, ATAD2B, ATXN1, BACH1, BAK1, BBS4, BEND3, BMP7, BPTF, BRMS1, BTG2, C1QBP, CBX8, CBY1, CCNH, CD36, CD38, CD46, CDC45, CDKN1B, CDKN2A, CEBPG, CELA1, CIPC, CIR1, CNOT2, CREB1, CREBZF, CTGF, CTNNB1, CUX1, CUX2, DDX3X, DDX5, DICER1, DLL4, DMRT1, DNAJB5, DR1, DUSP26, EIF2AK2, EIF2AK3, EN1, ENC1, ENO1, EOMES, EP300, ERCC3, ERI1, ESR1, …
GO:0030855	epithelial cell differentiation	GO_BiologicalProcess	5.9e-05	0.0031	[ACVRL1, AHI1, AKR1C2, ALOX15B, AQP3, ARID4A, ARID4B, ARNTL, BDH2, BMP7, BMPR2, C1GALT1, CDH23, CDK1, CGN, CLIC5, CREB1, CTNNB1, CUX1, DHX15, DICER1, DLG5, DLX6, DMRT1, DSP, ELF5, EPB41L5, ERCC3, ESR1, EYA1, FGFR3, FNDC3A, FOSL2, FOXA1, FOXA2, FSHR, GJA1, GPSM2, GSTA1, GSTA2, HNF1B, HNRNPH3, HPS6, ID2, IFNG, IFT74, IL13, INSC, KCNMA1, KDR, KIT, KITLG, KLF4, LCE1F, LCE3D, LCE3E, LHX1, LIF, LMNB2, …
GO:0009889	regulation of biosynthetic process	GO_BiologicalProcess	6.9e-05	0.0035	[ABCA1, ABHD14B, ACSL3, ACTN1, ACVRL1, ADCY7, ADORA2B, AES, AFF1, AFF3, AFF4, AGO3, AGO4, AHI1, AIF1, ANKRD13C, APBB2, APOC3, ARFGEF1, ARHGEF7, ARID1A, ARID4A, ARID4B, ARID5B, ARNTL, ASCL4, ASXL2, ATAD2B, ATXN1, BACE2, BACH1, BBX, BEND3, BEX2, BMP7, BMPR2, BOLL, BPTF, BRMS1, BRWD3, BTF3, BTG2, BZW1, C1QBP, CALM3, CAMK4, CAND1, CASP8AP2, CBL, CBX8, CBY1, CCNC, CCNH, CCNK, CCT3, CD36, CD38, CD80, C…
GO:0080090	regulation of primary metabolic process	GO_BiologicalProcess	7.3e-05	0.0036	[ABCA1, ABHD14B, ABHD5, ACSL3, ACTN1, ACVRL1, ADAM17, ADCY3, ADCY7, ADORA2B, AES, AFF1, AFF3, AFF4, AGO3, AGO4, AHI1, AIDA, AIF1, AKAP1, ALS2, ANAPC1, ANAPC16, APBB2, APOBEC3G, APOBEC3H, APOC3, ARFGEF1, ARHGEF7, ARID1A, ARID4A, ARID4B, ARID5B, ARNTL, ARRDC4, ARV1, ASCL4, ASXL2, ATAD2B, ATG14, ATG5, ATXN1, AZIN1, BACE2, BACH1, BAK1, BBS4, BBX, BCL2L11, BEND3, BEX2, BMP7, BMPR2, BOLL, BPGM, BPTF, B…
GO:0051171	regulation of nitrogen compound metabolic process	GO_BiologicalProcess	8.3e-05	0.004	[ABCA1, ABHD14B, ACSL3, ACTN1, ACVRL1, ADCY7, ADORA2B, AES, AFF1, AFF3, AFF4, AGO3, AGO4, AHI1, AIF1, APBB2, APOBEC3G, APOBEC3H, APOC3, ARHGEF7, ARID1A, ARID4A, ARID4B, ARID5B, ARNTL, ASCL4, ASXL2, ATAD2B, ATXN1, AZIN1, BACH1, BAK1, BBX, BEND3, BEX2, BMP7, BMPR2, BOLL, BPGM, BPTF, BRMS1, BRWD3, BTF3, BTG2, BZW1, C1QBP, CALM3, CAMK4, CAND1, CASP8AP2, CBL, CBX8, CBY1, CCNC, CCNH, CCNK, CCT3, CD36, …
GO:0000122	negative regulation of transcription from RNA polymerase II promoter	GO_BiologicalProcess	0.0001	0.0046	[AES, ARID1A, ARID5B, ASXL2, ATXN1, BACH1, BEND3, BPTF, BRMS1, BTG2, C1QBP, CBX8, CD36, CELA1, CNOT2, CTNNB1, CUX1, CUX2, DDX5, DICER1, DLL4, DMRT1, DNAJB5, DR1, DUSP26, EN1, ENO1, EOMES, EP300, ETV3, FGFR3, FHL2, FOXA2, FOXE1, FOXP2, FST, GCFC2, HDAC7, HDAC9, HEXIM2, HFE2, HIST1H1B, HIST1H1C, HIST1H1D, HIST1H1E, HMGB1, HNF1B, HNRNPAB, HSBP1, ID2, IFNG, IKZF1, IRF2, JARID2, KLF4, MEIS2, MLIP, MOS…
GO:0031324	negative regulation of cellular metabolic process	GO_BiologicalProcess	0.0001	0.0048	[ACVRL1, AES, AGO3, AGO4, AIDA, AKAP1, ANAPC1, ANAPC16, AP1AR, APOBEC3G, APOBEC3H, APOC3, ARID1A, ARID4A, ARID5B, ARNTL, ASXL2, ATAD2B, ATG14, ATG5, ATXN1, BACE2, BACH1, BAK1, BEND3, BMP7, BMPR2, BNIP3, BPTF, BRMS1, BTG2, C1QBP, CAMK2N1, CASP8AP2, CBX8, CBY1, CCDC8, CCNC, CD36, CD38, CD44, CD46, CDC45, CDKN1B, CDKN2A, CEBPG, CELA1, CEP192, CIPC, CIR1, CNOT2, CNST, CREB1, CREBZF, CTDSPL, CTNNB1, C…
GO:0006497	protein lipidation	GO_BiologicalProcess	0.00013	0.0057	[ABCA1, ATG4A, ATG4C, ATG4D, ATG5, HHAT, MTTP, OAS2, PIGC, PIGH, PIGN, PIGV, PIGY, PLAUR, PPM1B, PYURF, ZDHHC15, ZDHHC16, ZDHHC18, ZDHHC20, ZDHHC21, ZDHHC22, ZDHHC23]
GO:0032728	positive regulation of interferon-beta production	GO_BiologicalProcess	0.00013	0.0057	[DDX3X, DDX58, HMGB1, IFNAR1, MAVS, POLR3B, POLR3G, PTPN22, RIPK2, RNF135, TICAM1, TLR7]
GO:0031326	regulation of cellular biosynthetic process	GO_BiologicalProcess	0.00017	0.007	[ABCA1, ABHD14B, ACSL3, ACTN1, ACVRL1, ADCY7, ADORA2B, AES, AFF1, AFF3, AFF4, AGO3, AGO4, AHI1, AIF1, APBB2, APOC3, ARFGEF1, ARHGEF7, ARID1A, ARID4A, ARID4B, ARID5B, ARNTL, ASCL4, ASXL2, ATAD2B, ATXN1, BACE2, BACH1, BBX, BEND3, BEX2, BMP7, BMPR2, BOLL, BPTF, BRMS1, BRWD3, BTF3, BTG2, BZW1, C1QBP, CALM3, CAMK4, CAND1, CASP8AP2, CBL, CBX8, CBY1, CCNC, CCNH, CCNK, CCT3, CD36, CD38, CD80, CDC45, CDCA…
GO:0009892	negative regulation of metabolic process	GO_BiologicalProcess	0.00018	0.0071	[ACVRL1, AES, AGO3, AGO4, AIDA, AIF1, AKAP1, ANAPC1, ANAPC16, AP1AR, APOBEC3G, APOBEC3H, APOC3, ARFGEF1, ARID1A, ARID4A, ARID4B, ARID5B, ARNTL, ASXL2, ATAD2B, ATG14, ATG5, ATXN1, AZIN1, BACE2, BACH1, BAK1, BBS4, BEND3, BMP7, BMPR2, BNIP3, BPTF, BRMS1, BTG2, C1QBP, CAMK2N1, CAND1, CASP8AP2, CBX8, CBY1, CCDC8, CCNC, CCNH, CD36, CD38, CD44, CD46, CDC45, CDKN1B, CDKN2A, CEBPG, CELA1, CEP192, CIPC, CI…
GO:0090304	nucleic acid metabolic process	GO_BiologicalProcess	0.00019	0.0073	[A1CF, AAR2, AARS2, ABHD14B, ACTN1, ACVRL1, ADARB2, AES, AFF1, AFF3, AFF4, AGGF1, AGO3, AGO4, AHI1, APBB2, APOBEC2, APOBEC3A, APOBEC3G, APOBEC3H, AQR, ARHGEF7, ARID1A, ARID4A, ARID4B, ARID5B, ARNTL, ASCL4, ASXL2, ATAD2B, ATG5, ATXN1, BACH1, BBX, BEND3, BEX2, BMP7, BMPR2, BPTF, BRMS1, BRWD3, BTF3, BTG2, BZW1, C1QBP, CAMK4, CAND1, CARS, CASP8AP2, CBL, CBX8, CBY1, CCDC155, CCNC, CCNE2, CCNH, CCNK, C…
GO:0010556	regulation of macromolecule biosynthetic process	GO_BiologicalProcess	0.00021	0.0076	[ABHD14B, ACTN1, ACVRL1, AES, AFF1, AFF3, AFF4, AGO3, AGO4, AHI1, ANKRD13C, APBB2, ARFGEF1, ARHGEF7, ARID1A, ARID4A, ARID4B, ARID5B, ARNTL, ASCL4, ASXL2, ATAD2B, ATXN1, BACE2, BACH1, BBX, BEND3, BEX2, BMP7, BMPR2, BOLL, BPTF, BRMS1, BRWD3, BTF3, BTG2, BZW1, C1QBP, CAMK4, CAND1, CASP8AP2, CBL, CBX8, CBY1, CCNC, CCNH, CCNK, CCT3, CD36, CD38, CD80, CDC45, CDCA7, CDCA7L, CDK1, CDKN1B, CDKN2A, CEBPG, …
GO:0048731	system development	GO_BiologicalProcess	0.0002	0.0077	[AACS, ABCB5, ACSL3, ACTN1, ACVRL1, ADAM17, ADAM19, ADAMTS4, ADGRL2, AES, AGGF1, AGPAT5, AHI1, AK2, ALDH5A1, ALOX15B, ALS2, AMBN, AMTN, ANK3, ANKRD11, ANKS6, APBB2, AQP3, ARFGEF1, ARHGAP26, ARHGEF7, ARID1A, ARID4A, ARID4B, ARID5B, ARL13B, ARNTL, ARSB, ASB2, ASCL4, ASPRV1, ASTN1, ASXL2, ATG5, ATP11C, ATRN, ATXN1, AVIL, AZI2, B3GNT5, BAK1, BBS4, BBS5, BBX, BCL2L11, BDH1, BEX2, BICC1, BMP7, BMPR2, B…
GO:2000112	regulation of cellular macromolecule biosynthetic process	GO_BiologicalProcess	0.00022	0.0079	[ABHD14B, ACVRL1, AES, AFF1, AFF3, AFF4, AGO3, AGO4, AHI1, APBB2, ARFGEF1, ARHGEF7, ARID1A, ARID4A, ARID4B, ARID5B, ARNTL, ASCL4, ASXL2, ATAD2B, ATXN1, BACE2, BACH1, BBX, BEND3, BEX2, BMP7, BMPR2, BOLL, BPTF, BRMS1, BRWD3, BTF3, BTG2, BZW1, C1QBP, CAMK4, CAND1, CASP8AP2, CBL, CBX8, CBY1, CCNC, CCNH, CCNK, CCT3, CD36, CD38, CD80, CDC45, CDCA7, CDCA7L, CDK1, CDKN1B, CDKN2A, CEBPG, CELA1, CHAF1B, CH…
GO:0032648	regulation of interferon-beta production	GO_BiologicalProcess	0.00025	0.0088	[DDX3X, DDX58, HMGB1, IFNAR1, LILRB1, MAVS, POLR3B, POLR3G, PPM1B, PTPN22, RIPK2, RNF135, TICAM1, TIRAP, TLR7]
GO:0006357	regulation of transcription from RNA polymerase II promoter	GO_BiologicalProcess	0.00034	0.01	[ABHD14B, ACVRL1, AES, AHI1, ARID1A, ARID4A, ARID4B, ARID5B, ARNTL, ASCL4, ASXL2, ATAD2B, ATXN1, BACH1, BEND3, BEX2, BMP7, BMPR2, BPTF, BRMS1, BRWD3, BTG2, C1QBP, CAND1, CBX8, CCNC, CCNH, CCNK, CD36, CDC45, CDK1, CDKN2A, CEBPG, CELA1, CHD2, CIR1, CNOT2, CREB1, CRK, CRTC2, CTDSPL2, CTNNB1, CUX1, CUX2, CXCR3, DDX17, DDX3X, DDX5, DDX58, DICER1, DLL4, DMRT1, DNAJB5, DR1, DUSP26, E2F5, EGFR, EGLN3, EI…
GO:0009416	response to light stimulus	GO_BiologicalProcess	0.00037	0.01	[AKR1B10, APOC3, ARID4A, ATXN1, BAK1, BRAF, CASP9, CDS1, CHRM1, CNGA1, CNGB1, CNRIP1, CREB1, DHX15, DTL, EGFR, ELK1, EP300, ERCC3, ERCC4, ERCC8, EYS, FBXL3, FNTB, GLYAT, GNGT2, HIST3H2A, HMGCR, HMGCS1, HUS1, ID2, KCNH8, KIT, LPL, MEIS2, METAP1, METAP2, MTOR, N4BP1, NF1, NFATC4, NPHP1, NR2E3, NR2F6, NTRK2, OPN4, OPN5, PBK, PDC, PDE8B, PLB1, POLG, POLH, POLI, POLQ, PRKCQ, PTPRK, RAD18, RDH11, RIC8A…
GO:0010605	negative regulation of macromolecule metabolic process	GO_BiologicalProcess	0.00032	0.01	[ACVRL1, AES, AGO3, AGO4, AIDA, AIF1, AKAP1, ANAPC1, ANAPC16, AP1AR, APOBEC3G, APOBEC3H, ARID1A, ARID4A, ARID4B, ARID5B, ARNTL, ASXL2, ATAD2B, ATG14, ATG5, ATXN1, AZIN1, BACE2, BACH1, BAK1, BBS4, BEND3, BMP7, BMPR2, BPTF, BRMS1, BTG2, C1QBP, CAMK2N1, CASP8AP2, CBX8, CBY1, CCDC8, CCNH, CD36, CD38, CD44, CD46, CDC45, CDKN1B, CDKN2A, CEBPG, CELA1, CEP192, CIPC, CIR1, CNOT2, CNST, CREB1, CREBZF, CTDS…
GO:0031098	stress-activated protein kinase signaling cascade	GO_BiologicalProcess	0.00034	0.01	[ADORA2B, AIDA, ARHGEF7, CREB1, CTGF, DUSP4, DUSP6, DUSP7, DVL2, EIF2AK2, ELK1, FGF19, FKTN, FLT4, FZD10, GAB1, HMGB1, HMGCR, HSPH1, IRAK2, ITCH, KCNH8, LTBR, MAP2K6, MAP3K1, MAP3K8, MAP4K2, MAP4K4, MAP4K5, MID1, NCOR1, NEK1, NOD2, NRK, OXSR1, PAFAH1B1, PAK1, PAK6, PBK, PINK1, PTPN1, PTPN22, RAP2A, RASGRP1, RASSF2, RIPK2, RPS6KA3, SFRP1, STK26, TIRAP, TLR6, TNFRSF19, TNFSF11, TNXB, TPD52L1, VANGL…
GO:0031497	chromatin assembly	GO_BiologicalProcess	0.00034	0.01	[CDKN2A, CENPA, CENPN, CENPO, CHAF1A, CHAF1B, HIST1H1B, HIST1H1C, HIST1H1D, HIST1H1E, HIST1H1T, HIST1H2BA, HIST1H2BB, HIST1H2BH, HIST1H2BL, HIST1H2BM, HIST1H2BN, HIST1H2BO, HIST1H3A, HIST1H4A, HIST2H2BE, HIST2H2BF, HIST2H3A, HIST3H2BB, HIST3H3, HMGB1, KAT6A, NAP1L3, SHPRH, STRA13, TNRC18, TPR]
GO:0060429	epithelium development	GO_BiologicalProcess	0.00034	0.01	[ACVRL1, ADAM17, AHI1, AKR1C2, ALOX15B, AQP3, ARID1A, ARID4A, ARID4B, ARL13B, ARNTL, BAK1, BBS4, BBS5, BDH2, BMP7, BMPR2, C1GALT1, CD44, CDH23, CDK1, CGN, CLIC5, CREB1, CTGF, CTNNB1, CTSH, CUX1, CXCL12, CXCR2, DAAM1, DCT, DHX15, DICER1, DLG5, DLL4, DLX6, DMRT1, DSP, DVL2, EDNRA, EGFR, ELF5, EN1, EP300, EPB41L5, ERCC3, ESR1, ETV5, EYA1, FGF1, FGF7, FGFR3, FLRT3, FNDC3A, FOSL2, FOXA1, FOXA2, FOXE1,…
GO:0065004	protein-DNA complex assembly	GO_BiologicalProcess	0.00032	0.01	[CAND1, CDC45, CENPA, CENPN, CENPO, CHAF1A, CHAF1B, CREB1, HIST1H1B, HIST1H1C, HIST1H1D, HIST1H1E, HIST1H1T, HIST1H2BA, HIST1H2BB, HIST1H2BH, HIST1H2BL, HIST1H2BM, HIST1H2BN, HIST1H2BO, HIST1H3A, HIST1H4A, HIST2H2BE, HIST2H2BF, HIST2H3A, HIST3H2BB, HIST3H3, HMGB1, HNF1B, IKZF1, KAT6A, NAP1L3, RAD51B, SHPRH, STRA13, TAF1B, THRA]
GO:0071478	cellular response to radiation	GO_BiologicalProcess	0.00031	0.01	[BAK1, CASP9, CNGA1, CNGB1, CNRIP1, ELK1, EP300, ERCC4, FIGNL1, FNTB, GRB2, HIST3H2A, HUS1, KCNH8, KDM4D, METAP1, METAP2, MGMT, N4BP1, NFATC4, OPN4, PBK, POLH, POLI, POLQ, PRKCQ, PTPRK, RAD9B, RDH11, RPGR, SFRP1, SPAM1, STK19, TMEM161A, TP63, TRPM3, USP28, XRCC6, ZBTB1]
GO:0071824	protein-DNA complex subunit organization	GO_BiologicalProcess	0.00029	0.01	[ARID1A, CAND1, CDC45, CENPA, CENPN, CENPO, CHAF1A, CHAF1B, CREB1, FSHR, HIST1H1B, HIST1H1C, HIST1H1D, HIST1H1E, HIST1H1T, HIST1H2BA, HIST1H2BB, HIST1H2BH, HIST1H2BL, HIST1H2BM, HIST1H2BN, HIST1H2BO, HIST1H3A, HIST1H4A, HIST2H2BE, HIST2H2BF, HIST2H3A, HIST3H2A, HIST3H2BB, HIST3H3, HMGB1, HNF1B, IKZF1, KAT6A, NAP1L3, RAD51B, SHPRH, SMARCC2, SMARCE1, STRA13, TAF1B, THRA]
GO:0006333	chromatin assembly or disassembly	GO_BiologicalProcess	0.00041	0.011	[ARID1A, CDKN2A, CENPA, CENPN, CENPO, CHAF1A, CHAF1B, HIST1H1B, HIST1H1C, HIST1H1D, HIST1H1E, HIST1H1T, HIST1H2BA, HIST1H2BB, HIST1H2BH, HIST1H2BL, HIST1H2BM, HIST1H2BN, HIST1H2BO, HIST1H3A, HIST1H4A, HIST2H2BE, HIST2H2BF, HIST2H3A, HIST3H2A, HIST3H2BB, HIST3H3, HMGB1, KAT6A, NAP1L3, SHPRH, SMARCC2, SMARCE1, STRA13, TNRC18, TPR]
GO:0043412	macromolecule modification	GO_BiologicalProcess	0.00048	0.013	[A1CF, A4GALT, AARS2, ABCA1, ACVRL1, ADAM17, ADCY3, ADCY7, ADORA2B, AGBL3, AIDA, AIF1, AKAP1, ALG1, ALG10, ALG10B, ALG9, ALPK1, ALS2, ANAPC1, ANAPC16, ANK3, ANKRD28, APOBEC2, APOBEC3A, APOBEC3G, APOBEC3H, ARFGEF1, ARHGEF7, ARID4A, ARID4B, ARMT1, ARRDC4, ARSB, ARSK, ASB2, ASB3, ASB5, ASXL2, ATG14, ATG4A, ATG4C, ATG4D, ATG5, B3GNT5, B4GALT4, BACH1, BAK1, BEND3, BET1, BMP7, BMPR2, BRAF, BRMS1, BTG2,…
GO:0051173	positive regulation of nitrogen compound metabolic process	GO_BiologicalProcess	0.00048	0.013	[ABCA1, ABHD14B, ACSL3, ACVRL1, ADCY7, ADORA2B, AFF1, AHI1, AIF1, ARHGEF7, ARID1A, ARID4A, ARID4B, ARID5B, ARNTL, ASXL2, ATAD2B, ATXN1, BACH1, BAK1, BEX2, BMP7, BMPR2, BOLL, BPTF, BTG2, C1QBP, CALM3, CAMK4, CAND1, CBX8, CCNC, CCNH, CCNK, CCT3, CD38, CD80, CDK1, CDKN2A, CEBPG, CELA1, CHURC1, CHURC1-FNTB, CREB1, CREBL2, CRTC2, CTNNB1, CUX1, CXCL11, CXCR3, DBF4B, DDAH1, DDX17, DDX3X, DDX5, DDX58, DI…
GO:0071482	cellular response to light stimulus	GO_BiologicalProcess	0.00051	0.013	[BAK1, CASP9, CNGA1, CNGB1, CNRIP1, EP300, ERCC4, FNTB, HIST3H2A, METAP1, METAP2, N4BP1, NFATC4, OPN4, PBK, POLH, POLI, POLQ, PRKCQ, PTPRK, RDH11, RPGR, SPAM1, STK19, TMEM161A, TP63, TRPM3, USP28, ZBTB1]
GO:0006334	nucleosome assembly	GO_BiologicalProcess	0.00055	0.014	[CENPA, CENPN, CENPO, CHAF1A, CHAF1B, HIST1H1B, HIST1H1C, HIST1H1D, HIST1H1E, HIST1H1T, HIST1H2BA, HIST1H2BB, HIST1H2BH, HIST1H2BL, HIST1H2BM, HIST1H2BN, HIST1H2BO, HIST1H3A, HIST1H4A, HIST2H2BE, HIST2H2BF, HIST2H3A, HIST3H2BB, HIST3H3, KAT6A, NAP1L3, SHPRH, STRA13]
GO:0016070	RNA metabolic process	GO_BiologicalProcess	0.00057	0.014	[A1CF, AAR2, AARS2, ABHD14B, ACTN1, ACVRL1, ADARB2, AES, AFF1, AFF3, AFF4, AGGF1, AGO3, AGO4, AHI1, APBB2, APOBEC2, APOBEC3G, APOBEC3H, AQR, ARID1A, ARID4A, ARID4B, ARID5B, ARNTL, ASCL4, ASXL2, ATAD2B, ATG5, ATXN1, BACH1, BBX, BEND3, BEX2, BMP7, BMPR2, BPTF, BRMS1, BRWD3, BTF3, BTG2, BZW1, C1QBP, CAMK4, CAND1, CARS, CASP8AP2, CBL, CBX8, CBY1, CCNC, CCNH, CCNK, CD36, CD38, CD80, CDC45, CDCA7, CDCA…
GO:0034728	nucleosome organization	GO_BiologicalProcess	0.00057	0.014	[ARID1A, CENPA, CENPN, CENPO, CHAF1A, CHAF1B, FSHR, HIST1H1B, HIST1H1C, HIST1H1D, HIST1H1E, HIST1H1T, HIST1H2BA, HIST1H2BB, HIST1H2BH, HIST1H2BL, HIST1H2BM, HIST1H2BN, HIST1H2BO, HIST1H3A, HIST1H4A, HIST2H2BE, HIST2H2BF, HIST2H3A, HIST3H2A, HIST3H2BB, HIST3H3, KAT6A, NAP1L3, SHPRH, SMARCC2, SMARCE1, STRA13]
GO:0042490	mechanoreceptor differentiation	GO_BiologicalProcess	0.00054	0.014	[CDH23, CLIC5, CUX1, DICER1, FGFR3, KCNMA1, KIF3A, MYO6, NTF3, NTRK2, PAFAH1B1, PCDH15, PTPRQ, PTPRR, RBPJ, SLC9A3R1, SLITRK6, TSHR, USH2A, VANGL2]
GO:0006323	DNA packaging	GO_BiologicalProcess	0.00064	0.015	[A4GALT, CDK1, CDKN2A, CENPA, CENPN, CENPO, CHAF1A, CHAF1B, FSHR, HIST1H1B, HIST1H1C, HIST1H1D, HIST1H1E, HIST1H1T, HIST1H2BA, HIST1H2BB, HIST1H2BH, HIST1H2BL, HIST1H2BM, HIST1H2BN, HIST1H2BO, HIST1H3A, HIST1H4A, HIST2H2BE, HIST2H2BF, HIST2H3A, HIST3H2BB, HIST3H3, HMGB1, KAT6A, MCPH1, NAP1L3, RAB33B, SHPRH, SMC2, SRPK1, STRA13, TNRC18, TPR]
GO:0014009	glial cell proliferation	GO_BiologicalProcess	0.00061	0.015	[ATXN1, CREB1, CTNNB1, DICER1, ETV5, MTOR, PENK, PLAG1, RNF10, SOX4, UFL1]
GO:0035335	peptidyl-tyrosine dephosphorylation	GO_BiologicalProcess	0.00063	0.015	[CDC14A, CDC14B, DUSP11, DUSP26, DUSP4, DUSP6, DUSP7, EYA1, MTM1, NHLRC1, PGPEP1, POLG, PTP4A2, PTPN1, PTPN12, PTPN22, PTPRD, PTPRG, PTPRJ, PTPRK, PTPRQ, PTPRR, PTPRT, SSH1, SSH2, ZNF367]
GO:0046328	regulation of JNK cascade	GO_BiologicalProcess	0.00062	0.015	[AIDA, CTGF, DVL2, FGF19, FKTN, FLT4, FZD10, GAB1, HMGB1, ITCH, LTBR, MAP3K1, MAP4K2, MAP4K4, MAP4K5, NCOR1, NOD2, NRK, PAFAH1B1, PAK1, PINK1, PTPN1, PTPN22, RAP2A, RASGRP1, RASSF2, RIPK2, SFRP1, TIRAP, TLR6, TNFSF11, TNXB, TPD52L1, VANGL2, WNT16]
GO:0060479	lung cell differentiation	GO_BiologicalProcess	0.00061	0.015	[CREB1, CTNNB1, EYA1, FOXA1, FOXA2, GPSM2, IL13, INSC, RBPJ, THRA, THRB]
GO:0030520	intracellular estrogen receptor signaling pathway	GO_BiologicalProcess	0.00068	0.016	[ARID1A, CNOT2, DDX17, DDX5, DDX54, ESR1, FOXA1, FSHR, NCOA6, PAK1, PPARGC1B, STRN3, UBA5, UFL1, UFM1]
GO:0048522	positive regulation of cellular process	GO_BiologicalProcess	0.00071	0.016	[AACS, ABCA1, ABHD14B, ABHD5, ACSL3, ACVRL1, ADAM17, ADCY3, ADCY7, ADGRL2, ADORA2B, AES, AFF1, AGGF1, AGPAT1, AHI1, AIF1, AKR1C2, ALOX15B, ALS2, ANAPC1, ANAPC16, ANK3, ANO1, AP1AR, APBB2, APOC3, ARFGEF1, ARHGAP6, ARHGEF39, ARHGEF7, ARID1A, ARID4A, ARID4B, ARID5B, ARNTL, ARPC5L, ARRDC4, ARSB, ASXL2, ATAD2B, ATG14, ATG5, ATP11C, ATXN1, AVIL, AZIN1, BACH1, BAK1, BBS4, BCL2L11, BEX2, BMF, BMP7, BMPR2…
GO:2001141	regulation of RNA biosynthetic process	GO_BiologicalProcess	0.00077	0.017	[ABHD14B, ACTN1, ACVRL1, AES, AFF1, AFF3, AFF4, AHI1, APBB2, ARID1A, ARID4A, ARID4B, ARID5B, ARNTL, ASCL4, ASXL2, ATAD2B, ATXN1, BACH1, BBX, BEND3, BEX2, BMP7, BMPR2, BPTF, BRMS1, BRWD3, BTF3, BTG2, BZW1, C1QBP, CAMK4, CAND1, CASP8AP2, CBL, CBX8, CBY1, CCNC, CCNH, CCNK, CD36, CD38, CD80, CDC45, CDCA7, CDCA7L, CDK1, CDKN1B, CDKN2A, CEBPG, CELA1, CHAF1B, CHD2, CHURC1, CHURC1-FNTB, CIPC, CIR1, CNOT2…
GO:0035315	hair cell differentiation	GO_BiologicalProcess	0.00085	0.018	[CDH23, CLIC5, CTNNB1, CUX1, ERCC3, KCNMA1, MYO6, PAFAH1B1, PCDH15, PTPRQ, PTPRR, RBPJ, SLC9A3R1, SLITRK6, USH2A]
GO:0045935	positive regulation of nucleobase-containing compound metabolic process	GO_BiologicalProcess	0.00083	0.018	[ABCA1, ABHD14B, ACVRL1, ADCY7, ADORA2B, AFF1, AHI1, ARHGEF7, ARID1A, ARID4A, ARID4B, ARID5B, ARNTL, ASXL2, ATAD2B, ATXN1, BACH1, BAK1, BEX2, BMP7, BMPR2, BPTF, BTG2, CALM3, CAMK4, CAND1, CBX8, CCNC, CCNH, CCNK, CCT3, CD38, CD80, CDK1, CDKN2A, CEBPG, CELA1, CHURC1, CHURC1-FNTB, CREB1, CREBL2, CRTC2, CTNNB1, CUX1, CXCL11, CXCR3, DBF4B, DDX17, DDX3X, DDX5, DDX58, DICER1, DMRT1, DVL2, E2F5, EDNRA, E…
GO:0051403	stress-activated MAPK cascade	GO_BiologicalProcess	0.00079	0.018	[ADORA2B, AIDA, CREB1, CTGF, DUSP4, DUSP6, DUSP7, DVL2, EIF2AK2, ELK1, FGF19, FKTN, FLT4, FZD10, GAB1, HMGB1, HMGCR, HSPH1, IRAK2, ITCH, KCNH8, LTBR, MAP2K6, MAP3K1, MAP3K8, MAP4K2, MAP4K4, MAP4K5, MID1, NCOR1, NOD2, NRK, PAFAH1B1, PAK1, PBK, PINK1, PTPN1, PTPN22, RAP2A, RASGRP1, RASSF2, RIPK2, RPS6KA3, SFRP1, TIRAP, TLR6, TNFRSF19, TNFSF11, TNXB, TPD52L1, VANGL2, VEGFA, WNT16]
GO:0006366	transcription from RNA polymerase II promoter	GO_BiologicalProcess	0.00087	0.019	[ABHD14B, ACVRL1, AES, AFF4, AHI1, ARID1A, ARID4A, ARID4B, ARID5B, ARNTL, ASCL4, ASXL2, ATAD2B, ATXN1, BACH1, BEND3, BEX2, BMP7, BMPR2, BPTF, BRMS1, BRWD3, BTF3, BTG2, C1QBP, CAND1, CBX8, CCNC, CCNH, CCNK, CD36, CDC45, CDK1, CDKN2A, CEBPG, CELA1, CHD2, CIR1, CNOT2, CREB1, CRK, CRTC2, CSTF1, CTDSPL2, CTGF, CTNNB1, CUX1, CUX2, CXCR3, DDX17, DDX3X, DDX5, DDX58, DICER1, DLL4, DMRT1, DNAJB5, DR1, DUSP…
GO:0016337	single organismal cell-cell adhesion	GO_BiologicalProcess	0.00088	0.019	[ACTN1, ADAM17, AIF1, ANXA9, ARHGEF7, ASTN1, AZI2, BMP7, BRAF, CADM1, CAMK4, CBLL1, CCL28, CD151, CD274, CD40LG, CD44, CD46, CD47, CD5, CD80, CD93, CDKN2A, CLEC7A, COL19A1, COL8A2, CTLA4, CTNNB1, CXCL12, CXCL13, CYFIP2, DLG5, DLL4, DOCK2, DSP, EBI3, EGFR, ENC1, EOMES, EPB41L5, FAS, FNDC3A, FOXA1, FOXA2, FSTL3, FXYD5, GCNT1, GRB2, HAS2, HLA-DRA, HMGB1, HSH2D, HSPH1, IFNAR1, IFNG, IKZF1, IL17D, IL6…
GO:0032012	regulation of ARF protein signal transduction	GO_BiologicalProcess	0.00093	0.019	[ARFGEF1, ARFGEF2, CYTH2, CYTH3, FBXO8, IQSEC2, PISD, PSD3]
GO:0060009	Sertoli cell development	GO_BiologicalProcess	0.00093	0.019	[ARID4A, ARID4B, DMRT1, ESR1, FNDC3A, FSHR, RAB13, WT1]
GO:0051252	regulation of RNA metabolic process	GO_BiologicalProcess	0.00097	0.02	[ABHD14B, ACTN1, ACVRL1, AES, AFF1, AFF3, AFF4, AHI1, APBB2, APOBEC3G, APOBEC3H, ARID1A, ARID4A, ARID4B, ARID5B, ARNTL, ASCL4, ASXL2, ATAD2B, ATXN1, BACH1, BBX, BEND3, BEX2, BMP7, BMPR2, BPTF, BRMS1, BRWD3, BTF3, BTG2, BZW1, C1QBP, CAMK4, CAND1, CASP8AP2, CBL, CBX8, CBY1, CCNC, CCNH, CCNK, CD36, CD38, CD80, CDC45, CDCA7, CDCA7L, CDK1, CDKN1B, CDKN2A, CEBPG, CELA1, CHAF1B, CHD2, CHURC1, CHURC1-FNT…
GO:0009893	positive regulation of metabolic process	GO_BiologicalProcess	0.001	0.021	[ABCA1, ABHD14B, ABHD5, ACAP2, ACAP3, ACSL3, ACVRL1, ADAM17, ADCY3, ADCY7, ADORA2B, AFF1, AGFG1, AGPAT1, AHI1, AIF1, AKR1B10, ALS2, ALS2CL, ANAPC1, ANAPC16, ANK3, APOC3, APOC4-APOC2, ARFGEF1, ARFGEF2, ARHGAP18, ARHGAP20, ARHGAP26, ARHGAP6, ARHGEF25, ARHGEF33, ARHGEF39, ARHGEF7, ARID1A, ARID4A, ARID4B, ARID5B, ARNTL, ARRDC4, ASXL2, ATAD2B, ATG14, ATG5, ATXN1, AZIN1, BACH1, BAK1, BCL2L11, BEX2, BMP…
GO:0032872	regulation of stress-activated MAPK cascade	GO_BiologicalProcess	0.001	0.021	[AIDA, CTGF, DVL2, EIF2AK2, FGF19, FKTN, FLT4, FZD10, GAB1, HMGB1, HMGCR, HSPH1, ITCH, LTBR, MAP3K1, MAP4K2, MAP4K4, MAP4K5, MID1, NCOR1, NOD2, NRK, PAFAH1B1, PAK1, PBK, PINK1, PTPN1, PTPN22, RAP2A, RASGRP1, RASSF2, RIPK2, SFRP1, TIRAP, TLR6, TNFSF11, TNXB, TPD52L1, VANGL2, VEGFA, WNT16]
GO:0001569	patterning of blood vessels	GO_BiologicalProcess	0.0011	0.022	[BAK1, CTNNB1, CXCL12, DLL4, EDNRA, GBX2, NFATC4, NOTCH4, NRP1, SRF, TGFBR2, VEGFA]
GO:0031325	positive regulation of cellular metabolic process	GO_BiologicalProcess	0.0011	0.022	[ABCA1, ABHD14B, ABHD5, ACSL3, ACVRL1, ADAM17, ADCY3, ADCY7, ADORA2B, AFF1, AGPAT1, AHI1, AIF1, ALS2, ANAPC1, ANAPC16, APOC3, ARFGEF1, ARHGEF7, ARID1A, ARID4A, ARID4B, ARID5B, ARNTL, ARRDC4, ASXL2, ATAD2B, ATG14, ATG5, ATXN1, BACH1, BAK1, BCL2L11, BEX2, BMP7, BMPR2, BNIP3, BNIP3L, BOLL, BPTF, BRAF, BRMS1, BTBD10, BTG2, C1QBP, C6, CACUL1, CALCOCO2, CALM3, CAMK4, CAND1, CASP8AP2, CASP9, CBX8, CCL18…
GO:0060113	inner ear receptor cell differentiation	GO_BiologicalProcess	0.0011	0.022	[CDH23, CLIC5, CUX1, DICER1, FGFR3, KCNMA1, KIF3A, MYO6, PAFAH1B1, PCDH15, PTPRQ, PTPRR, RBPJ, SLC9A3R1, SLITRK6, TSHR, USH2A, VANGL2]
GO:1902589	single-organism organelle organization	GO_BiologicalProcess	0.0011	0.022	[A4GALT, AARS2, ACAA2, ACTN1, ADCY3, AGFG1, AHI1, AIF1, AKR1E2, ALPK1, ANAPC1, ANAPC16, ANK3, ANKRD28, AP1AR, ARFGEF1, ARHGAP18, ARHGAP26, ARHGAP6, ARHGEF7, ARID1A, ARID4A, ARID4B, ARL13B, ARPC5L, ASB2, ASXL2, ATG14, ATG4A, ATG4C, ATG4D, ATG5, AVIL, BAK1, BBOF1, BBS4, BBS5, BBS9, BCL2L11, BEND3, BET1, BICD2, BMF, BMP7, BNIP3, BNIP3L, BOLL, BRAF, BRMS1, C15orf62, C1QBP, CALCOCO2, CAPN6, CAPZB, CBX…
GO:0080135	regulation of cellular response to stress	GO_BiologicalProcess	0.0012	0.023	[AIDA, ARMT1, ARNTL, ATG5, BAK1, BCL2L11, BMP7, BNIP3, BNIP3L, BRAF, CALCOCO2, CASP9, CBX8, CD36, CD44, CDKN2A, CEBPG, CTGF, CXCL12, DDX5, DERL2, DNM1L, DVL2, EEF1E1, EGFR, EIF2AK2, EIF2AK3, EP300, ERCC8, EYA1, FGF19, FIGNL1, FKTN, FLT4, FZD10, GAB1, GPR37, HMGB1, HMGCR, HSBP1, HSPA1L, HSPH1, ING3, ITCH, KCNK2, KDM4D, KDR, KIAA1324, KLF4, LTBR, MAP3K1, MAP4K2, MAP4K4, MAP4K5, MGMT, MID1, MTOR, NC…
GO:0006464	cellular protein modification process	GO_BiologicalProcess	0.0013	0.024	[A4GALT, ABCA1, ACVRL1, ADAM17, ADCY3, ADCY7, ADORA2B, AGBL3, AIDA, AIF1, AKAP1, ALG1, ALG10, ALG10B, ALG9, ALPK1, ALS2, ANAPC1, ANAPC16, ANK3, ANKRD28, ARFGEF1, ARHGEF7, ARID4A, ARID4B, ARMT1, ARRDC4, ARSB, ARSK, ASB2, ASB3, ASB5, ASXL2, ATG14, ATG4A, ATG4C, ATG4D, ATG5, B3GNT5, B4GALT4, BACH1, BAK1, BEND3, BET1, BMP7, BMPR2, BRAF, BRMS1, BTG2, C1GALT1, CACUL1, CAMK2N1, CAMK4, CAND1, CBL, CBLL1,…
GO:0007399	nervous system development	GO_BiologicalProcess	0.0013	0.024	[ACSL3, ADGRL2, AHI1, AK2, ALDH5A1, ALS2, ANK3, APBB2, ARFGEF1, ARHGAP26, ARHGEF7, ARID1A, ARL13B, ARNTL, ARSB, ASTN1, ATRN, ATXN1, AVIL, B3GNT5, BAK1, BBS4, BCL2L11, BDH1, BEX2, BMP7, BMPR2, BPTF, BRAF, BTG2, BZW2, CACNA1D, CACNB1, CACNB2, CADM1, CAPZB, CCR4, CDH11, CDH23, CDK1, CHRM1, CHRM2, CLIC5, CNGB1, CNTN3, COL3A1, COL4A5, COL5A2, COL5A3, CRB1, CREB1, CRMP1, CTNNB1, CUX1, CUX2, CXCL12, CXC…
GO:0071103	DNA conformation change	GO_BiologicalProcess	0.0013	0.024	[A4GALT, CDC45, CDK1, CDKN2A, CENPA, CENPN, CENPO, CHAF1A, CHAF1B, CHD2, DDX3X, ERCC3, FSHR, G3BP1, HIST1H1B, HIST1H1C, HIST1H1D, HIST1H1E, HIST1H1T, HIST1H2BA, HIST1H2BB, HIST1H2BH, HIST1H2BL, HIST1H2BM, HIST1H2BN, HIST1H2BO, HIST1H3A, HIST1H4A, HIST2H2BE, HIST2H2BF, HIST2H3A, HIST3H2BB, HIST3H3, HMGB1, HMGB3, KAT6A, MCM4, MCPH1, MRE11A, NAP1L3, RAB33B, SHPRH, SMC2, SRPK1, STRA13, TNRC18, TPR, X…
GO:0007219	Notch signaling pathway	GO_BiologicalProcess	0.0013	0.025	[ADAM17, AGO3, AGO4, BMP7, CCNC, CD46, CDKN1B, CREB1, DLL4, EP300, EYA1, FOXA1, FOXA2, GALNT11, HDAC7, HDAC9, HNF1B, IFT74, IL6ST, ITCH, KCNA5, KIT, KRT19, NCOR1, NOD2, NOTCH2NL, NOTCH3, NOTCH4, RBPJ, RBX1, RIPPLY1, RPL10, S1PR3, SEL1L, SNW1, SORBS2, TBL1X, TBL1XR1, TGFBR2, TP63, TSPAN17, ZNF423]
GO:0048513	animal organ development	GO_BiologicalProcess	0.0014	0.025	[AACS, ABCB5, ACSL3, ACTN1, ACVRL1, ADAM17, ADAM19, AES, AGPAT5, AHI1, AK2, ALOX15B, AMBN, AMTN, ANKRD11, ANKS6, AQP3, ARHGEF7, ARID1A, ARID4A, ARID4B, ARID5B, ARL13B, ARNTL, ASB2, ASCL4, ASPRV1, ASXL2, ATG5, ATP11C, ATRN, ATXN1, AZI2, B3GNT5, BAK1, BBS4, BBS5, BBX, BCL2L11, BDH1, BICC1, BMP7, BMPR2, BPTF, BRAF, BTG2, C11orf88, C1GALT1, CADM1, CAMK4, CASP9, CBY1, CD164, CD40LG, CD44, CD46, CD80, …
GO:0010468	regulation of gene expression	GO_BiologicalProcess	0.0014	0.026	[A1CF, ABHD14B, ACVRL1, AES, AFF1, AFF3, AFF4, AGO3, AGO4, AHI1, AIF1, ANGEL2, ANK3, APBB2, ARID1A, ARID4A, ARID4B, ARID5B, ARNTL, ASCL4, ASXL2, ATAD2B, ATG14, ATXN1, BACH1, BAK1, BBS4, BBX, BEND3, BEX2, BMP7, BMPR2, BOLL, BPTF, BRAF, BRMS1, BRWD3, BTF3, BTG2, BZW1, C1QBP, C6, C7, CAMK4, CAND1, CASP8AP2, CBL, CBX8, CBY1, CCNC, CCNH, CCNK, CD36, CD38, CD44, CD46, CD80, CDC45, CDCA7, CDCA7L, CDK1, …
GO:0060537	muscle tissue development	GO_BiologicalProcess	0.0015	0.026	[ARID1A, ARNTL, ASB2, ATG5, BTG2, C11orf88, CBY1, CDK1, COL19A1, COL3A1, CTNNB1, DDX17, DDX5, DICER1, DLL4, DSP, EOMES, EP300, EYA1, FHL2, FOXN2, FOXP2, GJA1, GPCPD1, HDAC9, HLF, HMGCR, HOMER1, ID2, JPH2, KCNAB1, KCNK2, KEL, LRRC10, MEGF10, MEOX2, METTL8, MSTN, MTOR, MTPN, MYF6, MYH10, NCOR1, NF1, NR1D2, NRG1, OBSL1, OXSR1, PDGFRB, PDLIM5, PPARGC1A, RARB, RBPJ, S1PR1, SNW1, SORBS2, SRF, TGFBR2, T…
GO:0097659	nucleic acid-templated transcription	GO_BiologicalProcess	0.0015	0.026	[ABHD14B, ACTN1, ACVRL1, AES, AFF1, AFF3, AFF4, AHI1, APBB2, ARID1A, ARID4A, ARID4B, ARID5B, ARNTL, ASCL4, ASXL2, ATAD2B, ATXN1, BACH1, BBX, BEND3, BEX2, BMP7, BMPR2, BPTF, BRMS1, BRWD3, BTF3, BTG2, BZW1, C1QBP, CAMK4, CAND1, CASP8AP2, CBL, CBX8, CBY1, CCNC, CCNH, CCNK, CD36, CD38, CD80, CDC45, CDCA7, CDCA7L, CDK1, CDKN1B, CDKN2A, CEBPG, CELA1, CHAF1B, CHD2, CHURC1, CHURC1-FNTB, CIPC, CIR1, CNOT2…
GO:0048754	branching morphogenesis of an epithelial tube	GO_BiologicalProcess	0.0016	0.027	[BAK1, BMP7, CD44, CTNNB1, CTSH, CXCL12, DICER1, DLG5, DLL4, EDNRA, ESR1, ETV5, EYA1, FGF1, FOXA1, FOXA2, GBX2, HNF1B, KDR, LGR4, LHX1, NFATC4, NOTCH4, NRP1, PAK1, PGR, PTCH1, RSPO2, SALL1, SRF, TGFBR2, TIMELESS, TNC, VANGL2, VEGFA, WT1]
GO:0080134	regulation of response to stress	GO_BiologicalProcess	0.0016	0.027	[ADORA2B, AIDA, ALPK1, AP1S1, APOBEC3G, ARFGEF1, ARHGEF7, ARMT1, ARNTL, ASB2, ATG5, BAK1, BCL2L11, BMP7, BNIP3, BNIP3L, BRAF, C1QBP, C6, C7, CADM1, CALCOCO2, CASP9, CBX8, CCL18, CD36, CD44, CD46, CD47, CD93, CDKN2A, CEBPG, CHAF1B, CLEC6A, CLEC7A, CREB1, CTGF, CXCL12, DDX5, DDX58, DERL2, DNM1L, DOCK2, DUSP4, DUSP6, DUSP7, DVL2, EDNRA, EEF1E1, EGFR, EHHADH, EIF2AK2, EIF2AK3, ELK1, EP300, ERAP1, ERC…
GO:0098656	anion transmembrane transport	GO_BiologicalProcess	0.0015	0.027	[ABCA1, ANO1, ANO5, BEST4, CLCA2, CLCN2, CLCNKA, CLCNKB, CLIC5, CLIC6, EMB, FXYD3, GABRA2, GABRG2, GABRP, GLRA3, GLRB, MTOR, PEX3, PRKAA2, PRKAB2, PRKAG2, SLC12A3, SLC12A5, SLC12A6, SLC13A5, SLC16A1, SLC16A12, SLC20A1, SLC25A13, SLC26A1, SLC26A3, SLC34A2, SLC36A1, SLC36A4, SLC38A6, SLC4A1, SLC4A4, SLC4A5, SLC6A15, SLC6A16, SLC6A7, SLC7A6, THBS1, TTYH3]
GO:0018130	heterocycle biosynthetic process	GO_BiologicalProcess	0.0017	0.028	[ABCA1, ABHD14B, ACTN1, ACVRL1, ADCY3, ADCY7, ADORA2B, ADSSL1, AES, AFF1, AFF3, AFF4, AHI1, AK2, AK5, ALAD, ALAS1, APBB2, ARHGEF7, ARID1A, ARID4A, ARID4B, ARID5B, ARNTL, ASCL4, ASXL2, ATAD2B, ATG5, ATP5G3, ATP6V0A1, ATXN1, BACH1, BBX, BEND3, BEX2, BMP7, BMPR2, BPTF, BRMS1, BRWD3, BTF3, BTG2, BZW1, C1QBP, CALM3, CAMK4, CAND1, CASP8AP2, CBL, CBX8, CBY1, CCNC, CCNH, CCNK, CD36, CD38, CD80, CDC45, CD…
GO:0051094	positive regulation of developmental process	GO_BiologicalProcess	0.0016	0.028	[ACVRL1, ADGRL2, AGGF1, AHI1, ALOX15B, AMTN, ARHGEF7, ARNTL, ARSB, ASXL2, ATP11C, ATXN1, AVIL, BBS4, BMP7, BMPR2, BNIP3, BRAF, C1QBP, C6, CD36, CD46, CD80, CDK1, CDKN2A, CELA1, CHAMP1, CREB1, CREBL2, CTGF, CTNNB1, CTSH, CUX1, CUX2, CXCL12, CXCR2, CXCR3, CYSLTR2, DCSTAMP, DCT, DDAH1, DICER1, DMRT1, DNM1L, DPYSL3, EDNRA, EEF1E1, EEF2K, ENC1, EOMES, EPB41L5, ERAP1, ETV5, EXOSC3, F3, FGF1, FGF7, FGFR…
GO:0006821	chloride transport	GO_BiologicalProcess	0.0019	0.03	[ANO1, ANO5, BEST4, CLCA2, CLCN2, CLCNKA, CLCNKB, CLIC5, CLIC6, FXYD3, GABRA2, GABRG2, GABRP, GLRA3, GLRB, P2RY4, SLC12A3, SLC12A5, SLC12A6, SLC26A1, SLC26A3, SLC4A1, TTYH3]
GO:0000160	phosphorelay signal transduction system	GO_BiologicalProcess	0.002	0.031	[CNTLN, KCNH1, KCNH5, KCNH8, MMS19]
GO:0019438	aromatic compound biosynthetic process	GO_BiologicalProcess	0.0019	0.031	[ABCA1, ABHD14B, ACTN1, ACVRL1, ADCY3, ADCY7, ADORA2B, ADSSL1, AES, AFF1, AFF3, AFF4, AHI1, AK2, AK5, ALAD, ALAS1, APBB2, ARHGEF7, ARID1A, ARID4A, ARID4B, ARID5B, ARNTL, ASCL4, ASXL2, ATAD2B, ATG5, ATP5G3, ATP6V0A1, ATXN1, BACH1, BBX, BEND3, BEX2, BMP7, BMPR2, BPTF, BRMS1, BRWD3, BTF3, BTG2, BZW1, C1QBP, CALM3, CAMK4, CAND1, CASP8AP2, CBL, CBX8, CBY1, CCNC, CCNH, CCNK, CD36, CD38, CD80, CDC45, CD…
GO:0034770	histone H4-K20 methylation	GO_BiologicalProcess	0.002	0.031	[ARID4A, ARID4B, BEND3, KMT5B, WHSC1]
GO:0046951	ketone body biosynthetic process	GO_BiologicalProcess	0.002	0.031	[AACS, BDH1, BDH2, HMGCL, HMGCS2]
GO:1901362	organic cyclic compound biosynthetic process	GO_BiologicalProcess	0.0019	0.031	[ABCA1, ABHD14B, ACAA2, ACTN1, ACVRL1, ADCY3, ADCY7, ADORA2B, ADSSL1, AES, AFF1, AFF3, AFF4, AHI1, AK2, AK5, AKR1B15, AKR1D1, ALAD, ALAS1, APBB2, ARHGEF7, ARID1A, ARID4A, ARID4B, ARID5B, ARNTL, ARV1, ASCL4, ASXL2, ATAD2B, ATG5, ATP5G3, ATP6V0A1, ATXN1, BACH1, BBX, BEND3, BEX2, BMP7, BMPR2, BPTF, BRMS1, BRWD3, BTF3, BTG2, BZW1, C1QBP, CALM3, CAMK4, CAND1, CASP8AP2, CBL, CBX8, CBY1, CCNC, CCNH, CCN…
GO:2000026	regulation of multicellular organismal development	GO_BiologicalProcess	0.002	0.031	[ACVRL1, ADGRL2, AGGF1, AHI1, ALOX15B, AMTN, AQP3, ARHGEF7, ARID4A, ARNTL, ARSB, ASXL2, ATP11C, ATXN1, AVIL, BMP7, BMPR2, BRAF, C1QBP, C6, CAMK4, CD46, CD80, CDK1, CDKN1B, CDKN2A, CELA1, CHAMP1, COL3A1, COL5A2, CREB1, CTGF, CTLA4, CTNNB1, CTSH, CUX1, CUX2, CXCL12, CXCL13, CXCR2, CXCR3, CYSLTR2, DAAM1, DCSTAMP, DCT, DDAH1, DDX17, DDX5, DICER1, DLL4, DMRT1, DMRT3, DPYSL3, DUSP6, DVL2, ECSCR, EDNRA,…
GO:0002064	epithelial cell development	GO_BiologicalProcess	0.002	0.032	[ARID4A, ARID4B, ARNTL, C1GALT1, CDH23, CGN, CLIC5, CTNNB1, DHX15, DICER1, DMRT1, EPB41L5, ESR1, FGFR3, FNDC3A, FOSL2, FOXA1, FSHR, GJA1, IFT74, LIF, LMNB2, MAP3K1, MLLT4, NOTCH4, PAFAH1B1, PALLD, PCDH15, PGR, RAB13, RAB25, RAP1A, RAP1B, RARB, S1PR3, SALL1, SLC4A4, SLC4A5, SLC9A3R1, SLITRK6, TIGAR, TJP2, TP63, VSIG1, WT1, YIPF6]
GO:0010604	positive regulation of macromolecule metabolic process	GO_BiologicalProcess	0.002	0.032	[ABHD14B, ACVRL1, ADAM17, ADCY3, ADCY7, ADORA2B, AFF1, AHI1, AIF1, ALS2, ANAPC1, ANAPC16, ANK3, ARFGEF1, ARHGEF7, ARID1A, ARID4A, ARID4B, ARID5B, ARNTL, ARRDC4, ASXL2, ATAD2B, ATG14, ATXN1, BACH1, BAK1, BCL2L11, BEX2, BMP7, BMPR2, BOLL, BPTF, BRAF, BRMS1, BTG2, C1QBP, C6, CACUL1, CAMK4, CAND1, CASP8AP2, CASP9, CBX8, CCL18, CCNC, CCNH, CCNK, CCT3, CD36, CD38, CD44, CD46, CD80, CDC14B, CDK1, CDK2AP…
GO:0046486	glycerolipid metabolic process	GO_BiologicalProcess	0.0021	0.032	[ABHD12, ABHD3, ABHD5, ACOT13, ACSL3, ACSL6, AGPAT1, AGPAT5, ALDH5A1, APOC3, ATG14, AWAT1, CCNC, CDIPT, CDS1, CECR5, EFR3A, EFR3B, ELOVL2, ELOVL6, ELOVL7, ESR1, FABP2, FGF7, GK, GLYAT, GPAT3, GPCPD1, HACD2, HTR2C, IMPAD1, IP6K3, LPL, MBOAT1, MBOAT7, MTM1, MTTP, NKX2-3, NR1H3, PAFAH1B1, PDGFRB, PGPEP1, PIGC, PIGH, PIGN, PIGV, PIGY, PIK3C2A, PIP5K1B, PISD, PLA2G12A, PLA2G2D, PLA2G4E, PLAUR, PLB1, P…
GO:0030522	intracellular receptor signaling pathway	GO_BiologicalProcess	0.0022	0.033	[ALOX15B, ARID1A, ARNTL, ASXL2, C1QBP, CNOT2, CTNNB1, DDX17, DDX5, DDX54, DDX58, EP300, ESR1, ESRRG, FHL2, FOXA1, FSHR, GRIP1, IRAK2, ITCH, LSM14A, MAP2K6, MAVS, MED17, MIA3, NCOA6, NCOR1, NOD2, NR1D2, NR1H3, NR2E3, NR2F6, NR6A1, PAK1, PDK3, PGR, PIAS2, PPARG, PPARGC1A, PPARGC1B, PRAMEF6, PTGER3, PTGIS, PTPN22, RARB, RIPK2, SFRP1, SNW1, SP100, STRN3, THRA, THRB, TKFC, TRIM68, UBA5, UFL1, UFM1]
GO:0060428	lung epithelium development	GO_BiologicalProcess	0.0022	0.033	[CREB1, EYA1, FGF7, FGFR3, FOXA1, FOXA2, FOXP2, GPSM2, IL13, INSC, RBPJ, THRA, THRB]
GO:0001655	urogenital system development	GO_BiologicalProcess	0.0023	0.034	[AHI1, ALOX15B, ARID5B, BCL2L11, BMP7, C1GALT1, CD44, CDKN1B, CNRIP1, CTNNB1, CTSH, CUX1, CXCR2, DLG5, EDNRA, ESR1, EYA1, FGF1, FOXA1, FSTL3, GCNT1, GLYAT, HAS2, HMGCS2, HNF1B, ID2, KCNJ1, KIF26B, KIF3A, LGR4, LHX1, LIF, LIN28A, LMNB2, NEK1, NF1, NOTCH3, NPHP3, NRP1, ODC1, OXSR1, PDGFRB, PKHD1, PLAG1, PPAT, PSAP, PTCH1, RARB, SALL1, SFRP1, SIM1, SLC25A21, SMAD6, SOX4, STAT5A, THRA, TNC, TP63, TSC…
GO:0010557	positive regulation of macromolecule biosynthetic process	GO_BiologicalProcess	0.0024	0.034	[ABHD14B, ACVRL1, AFF1, AHI1, ARFGEF1, ARHGEF7, ARID1A, ARID4A, ARID4B, ARID5B, ARNTL, ASXL2, ATAD2B, ATXN1, BACH1, BEX2, BMP7, BMPR2, BOLL, BPTF, C1QBP, CAMK4, CAND1, CBX8, CCNC, CCNH, CCNK, CCT3, CD38, CD80, CDK1, CDKN2A, CEBPG, CELA1, CHURC1, CHURC1-FNTB, CREB1, CREBL2, CRTC2, CTGF, CTNNB1, CUX1, CXCR3, DBF4B, DDX17, DDX3X, DDX5, DDX58, DMRT1, DVL2, E2F5, EBI3, EGFR, EHHADH, EIF2A, EIF2AK2, EI…
GO:0030324	lung development	GO_BiologicalProcess	0.0023	0.034	[ATXN1, BMPR2, CREB1, CTGF, CTNNB1, CTSH, CUX1, DICER1, DLG5, EP300, EYA1, FGF1, FGF7, FGFR3, FOXA1, FOXA2, FOXP2, FSTL3, GPSM2, HMGCS2, HSD11B1, IL13, INSC, KDR, LIF, NOS3, NPHP3, PDPN, PGR, RBPJ, RSPO2, SRF, TGFBR2, THRA, THRB, TIMELESS, TMBIM6, TNC, VANGL2, VEGFA]
GO:0051240	positive regulation of multicellular organismal process	GO_BiologicalProcess	0.0023	0.034	[ACVRL1, ADAM17, ADGRL2, ADORA2B, AGGF1, AGPAT1, AIF1, ALOX15B, AMTN, ARFGEF2, ARHGEF7, ARNTL, ARSB, ASXL2, ATG5, ATP11C, ATXN1, AVIL, BBS4, BMP7, BMPR2, BRAF, C1QBP, C6, CADM1, CBX8, CD274, CD36, CD38, CD40LG, CD46, CD80, CDK1, CEBPG, CELA1, CHAMP1, CLEC6A, CREB1, CTGF, CTNNB1, CTSH, CUX1, CUX2, CXCL12, CXCR2, CXCR3, CYSLTR2, DCSTAMP, DCT, DDAH1, DDX3X, DDX58, DHX15, DICER1, DMRT1, DPYSL3, EBI3,…
GO:0035239	tube morphogenesis	GO_BiologicalProcess	0.0024	0.035	[ACVRL1, AHI1, ARID1A, ARL13B, BAK1, BBS4, BBS5, BCL2L11, BMP7, CD44, CTNNB1, CTSH, CXCL12, CXCR2, DICER1, DLG5, DLL4, DVL2, EDNRA, EGFR, EPB41L5, ESR1, ETV5, EYA1, FGF1, FGFR3, FOXA1, FOXA2, FOXN4, GBX2, GJA1, HNF1B, ID2, IFT52, IPMK, KDR, KIF26B, KIF3A, LGR4, LHX1, NFATC4, NKX2-3, NOTCH4, NPHP3, NRP1, OXSR1, PAK1, PAX3, PGR, PRKACB, PTCH1, RBPJ, RSPO2, SALL1, SFRP1, SOX4, SRF, SUFU, TCF7, TGFBR…
GO:0035767	endothelial cell chemotaxis	GO_BiologicalProcess	0.0024	0.035	[CXCL13, FGF1, HMGB1, KDR, NRG1, NRP1, RAB13, RPL10, THBS1, VEGFA]
GO:0006888	ER to Golgi vesicle-mediated transport	GO_BiologicalProcess	0.0026	0.036	[ANK3, ANKRD28, BCAP29, BET1, CNIH4, COPA, COPZ1, COPZ2, DCTN5, DCTN6, DYNC2LI1, GOLGA2, GORASP1, GOSR2, LMAN1, MIA3, PROS1, SAR1A, SCFD1, SEC22A, SEC22C, SEC23A, SEC24C, SEC24D, SEC31A, SERPINA1, SORL1, SPTB, STX18, TEX261, TMED2, TMED3, TRAPPC8, VAPA, WHAMM, ZNF547]
GO:0048523	negative regulation of cellular process	GO_BiologicalProcess	0.0025	0.036	[ABCA1, ACAA2, ACTN1, ACVRL1, ADAM17, AES, AGO3, AGO4, AHI1, AIDA, AIF1, AKAP1, ALOX15B, AMER2, ANAPC1, ANAPC16, ANGEL2, ANK3, AP1AR, APBB2, APOBEC3A, APOBEC3B, APOBEC3G, APOBEC3H, APOC3, ARFGEF1, ARHGAP6, ARHGEF7, ARID1A, ARID4A, ARID5B, ARNTL, ASXL2, ATAD2B, ATG14, ATG5, ATXN1, AVIL, BACE2, BACH1, BAK1, BBS4, BEND3, BICC1, BMF, BMP7, BMPR2, BNIP3, BNIP3L, BPI, BPTF, BRAF, BRMS1, BTBD10, BTG2, C…
GO:0010467	gene expression	GO_BiologicalProcess	0.0026	0.037	[A1CF, AAR2, AARS2, ABHD14B, ACVRL1, ADARB2, AES, AFF1, AFF3, AFF4, AGFG1, AGGF1, AGO3, AGO4, AHI1, AIF1, ANGEL2, ANK3, APBB2, APOBEC2, AQR, ARID1A, ARID4A, ARID4B, ARID5B, ARNTL, ASCL4, ASPRV1, ASXL2, ATAD2B, ATG14, ATG4A, ATG4C, ATG4D, ATXN1, BACE2, BACH1, BAK1, BBS4, BBX, BCL2L11, BEND3, BEX2, BMP7, BMPR2, BOLL, BPTF, BRAF, BRMS1, BRWD3, BTF3, BTG2, BZW1, C1QBP, C6, C7, CAMK4, CAND1, CARS, CAS…
GO:0034654	nucleobase-containing compound biosynthetic process	GO_BiologicalProcess	0.0028	0.038	[ABCA1, ABHD14B, ACTN1, ACVRL1, ADCY3, ADCY7, ADORA2B, ADSSL1, AES, AFF1, AFF3, AFF4, AHI1, AK2, AK5, APBB2, ARHGEF7, ARID1A, ARID4A, ARID4B, ARID5B, ARNTL, ASCL4, ASXL2, ATAD2B, ATG5, ATP5G3, ATP6V0A1, ATXN1, BACH1, BBX, BEND3, BEX2, BMP7, BMPR2, BPTF, BRMS1, BRWD3, BTF3, BTG2, BZW1, C1QBP, CALM3, CAMK4, CAND1, CASP8AP2, CBL, CBX8, CBY1, CCNC, CCNH, CCNK, CD36, CD38, CD80, CDC45, CDCA7, CDCA7L, …
GO:0060251	regulation of glial cell proliferation	GO_BiologicalProcess	0.0028	0.038	[ATXN1, CREB1, DICER1, ETV5, MTOR, PLAG1, RNF10, UFL1]
GO:0071285	cellular response to lithium ion	GO_BiologicalProcess	0.0028	0.038	[CDKN1B, CTNNB1, FAS, ID2, LIG4, NFATC4, PPARG, XRCC4]
GO:0072358	cardiovascular system development	GO_BiologicalProcess	0.0028	0.038	[ACVRL1, ADAM19, AGGF1, AHI1, ANKS6, ARID1A, ARL13B, ASXL2, ATG5, BAK1, BBS4, BBS5, BICC1, BMP7, BMPR2, C1GALT1, C6, CBY1, CDK1, CELA1, CHAMP1, CNRIP1, COL15A1, COL3A1, COL8A2, CTGF, CTNNB1, CTSH, CXCL12, CXCL13, CXCR2, CXCR3, CYSLTR2, DAW1, DCTN5, DDAH1, DDX17, DICER1, DLL4, DSP, DUSP6, DVL2, ECSCR, EDNRA, EIF2AK3, EOMES, EP300, ERAP1, ERBB3, EYA1, F3, FAP, FGF1, FGF19, FHL2, FLRT3, FLT4, FOSL1,…
GO:0019216	regulation of lipid metabolic process	GO_BiologicalProcess	0.003	0.041	[ABHD5, ACSL3, APOC3, ARV1, ATG14, BBS4, CCNC, CREB1, CREBL2, DLAT, EIF2AK3, ERLIN1, ERLIN2, ESR1, FAM3A, FGF1, FGF19, FGFR3, FOXA2, GK, GOLM1, GRIP1, HSD17B13, HTR2C, ID2, IFNAR1, IFNG, KCNMA1, KIT, KLF4, MTOR, NOD2, NR1D2, NR1H3, OPA3, PDE8B, PDGFRB, PDHB, PDHX, PDK3, PPARG, PPARGC1A, PRKAA2, PRKAB2, PRKAG2, PSAP, RUBCN, SAMD8, SF1, SLC27A1, STAT5A, STOML2, TBL1XR1, THRA, THRSP, TRIB3]
GO:0009891	positive regulation of biosynthetic process	GO_BiologicalProcess	0.0031	0.042	[ABCA1, ABHD14B, ACSL3, ACVRL1, ADCY7, ADORA2B, AFF1, AHI1, AIF1, APOC3, ARFGEF1, ARHGEF7, ARID1A, ARID4A, ARID4B, ARID5B, ARNTL, ASXL2, ATAD2B, ATXN1, BACH1, BEX2, BMP7, BMPR2, BOLL, BPTF, C1QBP, CALM3, CAMK4, CAND1, CBX8, CCNC, CCNH, CCNK, CCT3, CD38, CD80, CDK1, CDKN2A, CEBPG, CELA1, CHURC1, CHURC1-FNTB, CREB1, CREBL2, CRTC2, CTGF, CTNNB1, CUX1, CXCR3, DBF4B, DDAH1, DDX17, DDX3X, DDX5, DDX58, …
GO:0019637	organophosphate metabolic process	GO_BiologicalProcess	0.0031	0.042	[ABCA1, ABHD12, ABHD14B, ABHD3, ABHD5, ACSL3, ADCY3, ADCY7, ADORA2B, ADSSL1, AGPAT1, AGPAT5, AK2, AK5, ALDH5A1, APOC3, ATG14, ATP5G3, ATP6V0A1, ATP6V1A, AWAT1, BPGM, CALM3, CDIPT, CDS1, CECR5, CMPK1, COA6, CXCL11, CXCR3, DHODH, DHTKD1, DNM1L, EDNRA, EFR3A, EFR3B, ENO1, ENTPD3, FADS1, FAM3A, FGF7, FGFR3, FIGNL1, FMO2, FSHR, FXN, G6PC2, GFPT1, GK, GLP1R, GLYAT, GPAT3, GPCPD1, GUCY1A3, HMGCR, HTR2C,…
GO:0014706	striated muscle tissue development	GO_BiologicalProcess	0.0036	0.047	[ARID1A, ARNTL, ASB2, ATG5, BTG2, C11orf88, CBY1, CDK1, COL19A1, CTNNB1, DDX17, DDX5, DICER1, DLL4, DSP, EOMES, EP300, EYA1, FHL2, FOXN2, FOXP2, GJA1, GPCPD1, HDAC9, HLF, HMGCR, HOMER1, ID2, JPH2, KCNAB1, KCNK2, KEL, LRRC10, MEGF10, MEOX2, METTL8, MSTN, MTOR, MTPN, MYF6, MYH10, NCOR1, NF1, NR1D2, NRG1, OBSL1, PDGFRB, PDLIM5, RARB, RBPJ, S1PR1, SNW1, SORBS2, SRF, TGFBR2, TSC1, USP2, VAX1, VEGFA, W…
GO:0031054	pre-miRNA processing	GO_BiologicalProcess	0.0037	0.048	[AGO3, AGO4, DICER1, LIN28A, LIN28B, MRPL44]
GO:0035295	tube development	GO_BiologicalProcess	0.0036	0.048	[ACVRL1, AHI1, ARID1A, ARL13B, ATXN1, BAK1, BBS4, BBS5, BCL2L11, BMP7, BMPR2, C1GALT1, CD44, COL3A1, CREB1, CTGF, CTNNB1, CTSH, CUX1, CXCL12, CXCR2, DHX15, DICER1, DLG5, DLL4, DVL2, EDNRA, EGFR, EN1, EP300, EPB41L5, ESR1, ETV5, EYA1, FGF1, FGF7, FGFR3, FOXA1, FOXA2, FOXE1, FOXN4, FOXP2, FSTL3, GBX2, GJA1, GLYAT, GPSM2, HMGCS2, HNF1B, HSD11B1, ID2, IFT52, IL13, ING3, INSC, IPMK, KDR, KIF26B, KIF3A…
GO:0090141	positive regulation of mitochondrial fission	GO_BiologicalProcess	0.0037	0.048	[BNIP3, DNM1L, KDR, MARCH5, MFF, PINK1]
GO:0044424	intracellular part	GO_CellularComponent	7.8e-14	7.8e-11	[A1CF, A4GALT, AACS, AARS2, ABCA1, ABCC6, ABHD14B, ABHD5, ACAA2, ACAP2, ACOT13, ACRBP, ACSL3, ACSL6, ACSM5, ACTBL2, ACTN1, ACTR6, ADAM12, ADAM17, ADAM19, ADARB2, ADCY3, ADSSL1, AES, AFAP1L1, AFF1, AFF3, AFF4, AGBL3, AGFG1, AGGF1, AGL, AGO3, AGO4, AGPAT1, AGPAT5, AHCY, AHI1, AIDA, AIF1, AK2, AK5, AKAP1, AKR1B10, AKR1B15, AKR1C2, AKR1D1, AKR1E2, ALAD, ALAS1, ALDH5A1, ALDH6A1, ALG1, ALG10, ALG10B, A…
GO:0000786	nucleosome	GO_CellularComponent	2.4e-09	9.8e-07	[A4GALT, CENPA, HIST1H1B, HIST1H1C, HIST1H1D, HIST1H1E, HIST1H1T, HIST1H2AA, HIST1H2AB, HIST1H2AD, HIST1H2AH, HIST1H2AJ, HIST1H2AK, HIST1H2BA, HIST1H2BB, HIST1H2BH, HIST1H2BL, HIST1H2BM, HIST1H2BN, HIST1H2BO, HIST1H3A, HIST1H4A, HIST2H2AA3, HIST2H2BE, HIST2H2BF, HIST2H3A, HIST3H2A, HIST3H2BB, HIST3H3, KAT6A, SHPRH]
GO:0005737	cytoplasm	GO_CellularComponent	5.2e-08	1.7e-05	[A1CF, A4GALT, AACS, AARS2, ABCA1, ABCC6, ABHD14B, ABHD5, ACAA2, ACAP2, ACOT13, ACRBP, ACSL3, ACSL6, ACSM5, ACTBL2, ACTN1, ACTR6, ADAM12, ADAM17, ADAM19, ADCY3, ADSSL1, AFAP1L1, AFF3, AGBL3, AGFG1, AGGF1, AGL, AGO3, AGO4, AGPAT1, AGPAT5, AHCY, AHI1, AIDA, AIF1, AK2, AK5, AKAP1, AKR1B10, AKR1B15, AKR1C2, AKR1D1, AKR1E2, ALAD, ALAS1, ALDH5A1, ALDH6A1, ALG1, ALG10, ALG10B, ALG9, ALOX15B, ALS2, ALS2C…
GO:0043229	intracellular organelle	GO_CellularComponent	2e-07	5e-05	[A1CF, A4GALT, AARS2, ABCA1, ABCC6, ABHD14B, ABHD5, ACAA2, ACAP2, ACOT13, ACRBP, ACSL3, ACSL6, ACSM5, ACTBL2, ACTN1, ACTR6, ADAM12, ADAM17, ADAM19, ADARB2, ADCY3, AES, AFAP1L1, AFF1, AFF3, AFF4, AGFG1, AGL, AGO3, AGO4, AGPAT1, AGPAT5, AHCY, AHI1, AIF1, AK2, AK5, AKAP1, AKR1B10, AKR1B15, ALAD, ALAS1, ALDH5A1, ALDH6A1, ALG1, ALG10, ALG10B, ALG9, ALOX15B, ALS2, ANAPC1, ANAPC16, ANGEL2, ANK3, ANKRD11…
GO:0043231	intracellular membrane-bounded organelle	GO_CellularComponent	8.7e-07	0.00019	[A1CF, A4GALT, AARS2, ABCA1, ABCC6, ABHD14B, ABHD5, ACAA2, ACAP2, ACOT13, ACRBP, ACSL3, ACSL6, ACSM5, ACTN1, ACTR6, ADAM12, ADAM19, ADARB2, ADCY3, AES, AFAP1L1, AFF1, AFF3, AFF4, AGFG1, AGL, AGPAT1, AGPAT5, AHCY, AIF1, AK2, AK5, AKAP1, AKR1B10, AKR1B15, ALAD, ALAS1, ALDH5A1, ALDH6A1, ALG1, ALG10, ALG10B, ALG9, ALOX15B, ALS2, ANAPC1, ANAPC16, ANGEL2, ANK3, ANKRD11, ANKRD13C, ANKRD28, ANKZF1, ANO5,…
GO:0000785	chromatin	GO_CellularComponent	8.3e-06	0.00083	[A4GALT, AFF4, ARID1A, ASXL2, BEND3, BRMS1, CBX8, CDKN2A, CENPA, CHAF1A, CHAF1B, CREB1, CTNNB1, DBF4B, DFFA, DPF2, ENC1, ESCO2, ESR1, ETV3, EXOSC3, FANCC, HIST1H1B, HIST1H1C, HIST1H1D, HIST1H1E, HIST1H1T, HIST1H2AA, HIST1H2AB, HIST1H2AD, HIST1H2AH, HIST1H2AJ, HIST1H2AK, HIST1H2BA, HIST1H2BB, HIST1H2BH, HIST1H2BL, HIST1H2BM, HIST1H2BN, HIST1H2BO, HIST1H3A, HIST1H4A, HIST2H2AA3, HIST2H2BE, HIST2H2B…
GO:0044444	cytoplasmic part	GO_CellularComponent	8.1e-06	0.00085	[A1CF, A4GALT, AACS, AARS2, ABCA1, ABCC6, ABHD14B, ABHD5, ACAA2, ACAP2, ACOT13, ACRBP, ACSL3, ACSL6, ACSM5, ACTN1, ADAM12, ADAM19, ADCY3, ADSSL1, AGBL3, AGFG1, AGGF1, AGL, AGO3, AGO4, AGPAT1, AGPAT5, AHCY, AHI1, AIF1, AK2, AK5, AKAP1, AKR1B10, AKR1B15, AKR1D1, ALAD, ALAS1, ALDH5A1, ALDH6A1, ALG1, ALG10, ALG10B, ALG9, ALOX15B, ALS2, ANAPC1, ANAPC16, ANK3, ANKRD13C, ANKRD28, ANKZF1, ANO5, ANXA9, AP…
GO:0000788	nuclear nucleosome	GO_CellularComponent	1e-05	0.00097	[HIST1H2BA, HIST1H2BB, HIST1H2BH, HIST1H2BL, HIST1H2BM, HIST1H2BN, HIST1H2BO, HIST1H3A, HIST2H2BE, HIST2H2BF, HIST3H2A, HIST3H2BB, HIST3H3]
GO:0000790	nuclear chromatin	GO_CellularComponent	1.2e-05	0.0011	[ARID1A, ASXL2, BEND3, BRMS1, CBX8, CHAF1A, CHAF1B, CREB1, CTNNB1, DBF4B, DFFA, DPF2, ENC1, ESCO2, ESR1, ETV3, HIST1H1B, HIST1H1C, HIST1H1D, HIST1H1E, HIST1H2AA, HIST1H2AB, HIST1H2AD, HIST1H2AH, HIST1H2AJ, HIST1H2BA, HIST1H2BB, HIST1H2BH, HIST1H2BL, HIST1H2BM, HIST1H2BN, HIST1H2BO, HIST1H3A, HIST2H2AA3, HIST2H2BE, HIST2H2BF, HIST3H2A, HIST3H2BB, HIST3H3, HYPM, ING3, KLF1, KLF4, MRE11A, NCOR1, NR1…
GO:0031981	nuclear lumen	GO_CellularComponent	2.3e-05	0.0016	[A1CF, ABHD14B, ADAM12, AFF1, AFF3, AFF4, AK5, ALAS1, ALDH6A1, ANAPC1, ANAPC16, ANGEL2, ANKRD11, ANKRD28, APOBEC3A, APPL1, APPL2, AQR, ARFGEF1, ARID1A, ARID4A, ARID4B, ARID5B, ARNTL, ASXL2, ATP6V0A1, ATXN1, ATXN2L, BBX, BDH1, BEND3, BNIP3, BPTF, BRMS1, BTBD10, C11orf49, C1QBP, C9orf72, CAMK4, CAND1, CASP8AP2, CBLL1, CBX8, CBY1, CCDC113, CCDC155, CCDC174, CCNC, CCNE2, CCNH, CCNK, CDC14A, CDC14B, C…
GO:0043232	intracellular non-membrane-bounded organelle	GO_CellularComponent	2.3e-05	0.0016	[A4GALT, ABHD14B, ABHD5, ACAA2, ACOT13, ACSL3, ACTBL2, ACTN1, ACTR6, ADAM17, AFAP1L1, AFF4, AGO3, AGO4, AHI1, AIF1, AK5, AKAP1, ALOX15B, ALS2, ANK3, APOBEC3G, APOBEC3H, APPBP2, ARFGEF1, ARFGEF2, ARHGAP26, ARHGAP6, ARHGEF25, ARID1A, ARNTL, ARPC5L, ASXL2, ATXN2L, AVIL, BBOF1, BBS4, BBS5, BBS9, BCAS1, BCL2L11, BEND3, BICD2, BMF, BMPR2, BNIP3, BRMS1, BTBD10, C12orf66, C1QBP, C9orf72, CACNA1D, CALCOCO…
GO:0005694	chromosome	GO_CellularComponent	4.6e-05	0.0025	[A4GALT, AFF4, ARID1A, ASXL2, BEND3, BRMS1, CBX8, CCDC155, CDC45, CDK1, CDKN2A, CENPA, CENPN, CENPO, CHAF1A, CHAF1B, CHAMP1, CLIP1, CNGB1, CREB1, CTNNB1, DBF4B, DCTN5, DCTN6, DFFA, DPF2, DSN1, DTL, ENC1, ERCC4, ESCO2, ESR1, ETV3, EXOSC3, FAM208A, FANCC, FIGNL1, HIST1H1B, HIST1H1C, HIST1H1D, HIST1H1E, HIST1H1T, HIST1H2AA, HIST1H2AB, HIST1H2AD, HIST1H2AH, HIST1H2AJ, HIST1H2AK, HIST1H2BA, HIST1H2BB,…
GO:0005654	nucleoplasm	GO_CellularComponent	9.2e-05	0.0044	[A1CF, ADAM12, AFF1, AFF3, AFF4, AK5, ALAS1, ALDH6A1, ANAPC1, ANAPC16, ANGEL2, ANKRD11, ANKRD28, APOBEC3A, APPL1, APPL2, AQR, ARFGEF1, ARID1A, ARID4A, ARID4B, ARID5B, ARNTL, ASXL2, ATP6V0A1, ATXN1, ATXN2L, BBX, BDH1, BNIP3, BPTF, BRMS1, BTBD10, C11orf49, C9orf72, CAMK4, CAND1, CASP8AP2, CBLL1, CBX8, CBY1, CCDC113, CCDC174, CCNC, CCNE2, CCNH, CCNK, CDC14A, CDC14B, CDC45, CDCA7, CDK1, CDKN1B, CDKN2…
GO:0005634	nucleus	GO_CellularComponent	0.0001	0.0047	[A1CF, A4GALT, ABCC6, ABHD14B, ABHD5, ACOT13, ACRBP, ACTR6, ADAM12, ADARB2, ADCY3, AES, AFAP1L1, AFF1, AFF3, AFF4, AGFG1, AGL, AGPAT5, AHCY, AIF1, AK5, ALAD, ALAS1, ALDH6A1, ALOX15B, ANAPC1, ANAPC16, ANGEL2, ANKRD11, ANKRD28, APBB2, APOBEC3A, APOBEC3B, APOBEC3G, APOBEC3H, APPBP2, APPL1, APPL2, AQP3, AQR, ARFGEF1, ARID1A, ARID4A, ARID4B, ARID5B, ARNTL, ASCL4, ASXL2, ATAD2B, ATG14, ATP11B, ATP6V0A1…
GO:0044427	chromosomal part	GO_CellularComponent	0.00011	0.005	[A4GALT, AFF4, ARID1A, ASXL2, BEND3, BRMS1, CBX8, CCDC155, CDC45, CDK1, CDKN2A, CENPA, CENPN, CENPO, CHAF1A, CHAF1B, CHAMP1, CLIP1, CNGB1, CREB1, CTNNB1, DBF4B, DCTN5, DCTN6, DFFA, DPF2, DSN1, ENC1, ERCC4, ESCO2, ESR1, ETV3, EXOSC3, FANCC, HIST1H1B, HIST1H1C, HIST1H1D, HIST1H1E, HIST1H1T, HIST1H2AA, HIST1H2AB, HIST1H2AD, HIST1H2AH, HIST1H2AJ, HIST1H2AK, HIST1H2BA, HIST1H2BB, HIST1H2BH, HIST1H2BL,…
GO:0044428	nuclear part	GO_CellularComponent	0.00014	0.0058	[A1CF, ABHD14B, ADAM12, AFF1, AFF3, AFF4, AGFG1, AGPAT5, AK5, ALAS1, ALDH6A1, ANAPC1, ANAPC16, ANGEL2, ANKRD11, ANKRD28, APOBEC3A, APOBEC3G, APPL1, APPL2, AQR, ARFGEF1, ARID1A, ARID4A, ARID4B, ARID5B, ARNTL, ASXL2, ATP11B, ATP6V0A1, ATXN1, ATXN2L, BBX, BDH1, BEND3, BNIP3, BNIP3L, BPTF, BRMS1, BTBD10, C11orf49, C1QBP, C9orf72, CACUL1, CAMK4, CAND1, CASP8AP2, CBLL1, CBX8, CBY1, CCDC113, CCDC155, CC…
GO:0044446	intracellular organelle part	GO_CellularComponent	0.00019	0.0074	[A1CF, A4GALT, ABCC6, ABHD14B, ACAA2, ACAP2, ACOT13, ACSL3, ACSL6, ACSM5, ACTN1, ADAM12, AFAP1L1, AFF1, AFF3, AFF4, AGFG1, AGPAT1, AGPAT5, AHI1, AIF1, AK2, AK5, AKAP1, AKR1B10, AKR1B15, ALAS1, ALDH5A1, ALDH6A1, ALG1, ALG10, ALG10B, ALG9, ALS2, ANAPC1, ANAPC16, ANGEL2, ANKRD11, ANKRD13C, ANKRD28, ANKZF1, ANO5, AP1S1, APOBEC3A, APOBEC3G, APOOL, APPBP2, APPL1, APPL2, AQR, ARFGEF1, ARFGEF2, ARHGAP6, …
GO:0070013	intracellular organelle lumen	GO_CellularComponent	0.00022	0.008	[A1CF, ABHD14B, ACSM5, ADAM12, AFF1, AFF3, AFF4, AK5, AKAP1, AKR1B15, ALAS1, ALDH5A1, ALDH6A1, ANAPC1, ANAPC16, ANGEL2, ANKRD11, ANKRD28, APOBEC3A, APPL1, APPL2, AQR, ARFGEF1, ARID1A, ARID4A, ARID4B, ARID5B, ARNTL, ARSB, ARSK, ASXL2, ATG4D, ATP6V0A1, ATXN1, ATXN2L, BBX, BDH1, BEND3, BNIP3, BPTF, BRMS1, BTBD10, C11orf49, C1QBP, C9orf72, CAMK4, CAND1, CASP8AP2, CBLL1, CBX8, CBY1, CCDC113, CCDC155, …
GO:0030120	vesicle coat	GO_CellularComponent	0.00033	0.01	[AP1S1, COPA, COPZ1, COPZ2, EGFR, F3, NECAP2, PICALM, SCYL1, SEC23A, SEC24C, SEC24D, SEC31A, TMED3, VMA21]
GO:0005916	fascia adherens	GO_CellularComponent	0.00056	0.014	[ACTN1, CTNNB1, DES, DSP, GJA1, NOL6, VCL]
GO:0000228	nuclear chromosome	GO_CellularComponent	0.00092	0.019	[ARID1A, ASXL2, BEND3, BRMS1, CBX8, CCDC155, CDC45, CDK1, CENPA, CHAF1A, CHAF1B, CNGB1, CREB1, CTNNB1, DBF4B, DFFA, DPF2, ENC1, ERCC4, ESCO2, ESR1, ETV3, FIGNL1, HIST1H1B, HIST1H1C, HIST1H1D, HIST1H1E, HIST1H1T, HIST1H2AA, HIST1H2AB, HIST1H2AD, HIST1H2AH, HIST1H2AJ, HIST1H2BA, HIST1H2BB, HIST1H2BH, HIST1H2BL, HIST1H2BM, HIST1H2BN, HIST1H2BO, HIST1H3A, HIST1H4A, HIST2H2AA3, HIST2H2BE, HIST2H2BF, H…
GO:0016324	apical plasma membrane	GO_CellularComponent	0.001	0.02	[ABCC2, ABCC6, ABCG5, ABCG8, ADAM17, AJAP1, ANO1, ATP6V1A, BMPR2, CD300LG, CD36, CRB1, CYP4F2, DUOX2, ERBB3, F2RL2, F3, FAM65B, FAS, GJA1, INADL, KCNA5, KCNK2, KCNMA1, KL, MAL, MAL2, MPDZ, MTDH, MUC13, NRG1, OXTR, P2RY1, P2RY4, PDGFRB, PDZK1, PKHD1, PLB1, PLD1, PROM2, SLC11A2, SLC12A3, SLC26A3, SLC28A1, SLC34A2, SLC4A4, SLC4A5, SLC9A3R1, SLCO2B1, SORBS2, STK26, SYTL4, TMEM30A, TRPM6, USH2A, VAMP3…
GO:0005829	cytosol	GO_CellularComponent	0.001	0.021	[AACS, AARS2, ABHD14B, ABHD5, ACOT13, ACTN1, ADSSL1, AGBL3, AGL, AGO3, AGO4, AHCY, AHI1, AIF1, AK2, AK5, AKAP1, AKR1B10, AKR1B15, AKR1D1, ALAD, ALOX15B, ALS2, ANAPC1, ANAPC16, ANK3, ANKRD28, ANXA9, AP1S1, APOBEC3G, APPL1, AQP11, ARFGEF1, ARFGEF2, ARHGAP18, ARHGAP20, ARHGAP26, ARHGAP6, ARHGEF25, ARHGEF7, ARID4A, ATG14, ATG4A, ATG4C, ATG4D, ATG5, ATP6V1A, ATP6V1G2, AZIN1, BACH1, BAK1, BBS4, BBS5, B…
GO:0034707	chloride channel complex	GO_CellularComponent	0.0017	0.028	[ANO1, BEST4, CLCN2, CLCNKA, CLCNKB, CLIC5, CLIC6, FXYD3, GABRA2, GABRG2, GABRP, GLRA3, GLRB, TTYH3]
GO:0030127	COPII vesicle coat	GO_CellularComponent	0.002	0.031	[SEC23A, SEC24C, SEC24D, SEC31A, VMA21]
GO:0044454	nuclear chromosome part	GO_CellularComponent	0.0021	0.032	[ARID1A, ASXL2, BEND3, BRMS1, CBX8, CCDC155, CDC45, CDK1, CENPA, CHAF1A, CHAF1B, CNGB1, CREB1, CTNNB1, DBF4B, DFFA, DPF2, ENC1, ERCC4, ESCO2, ESR1, ETV3, HIST1H1B, HIST1H1C, HIST1H1D, HIST1H1E, HIST1H2AA, HIST1H2AB, HIST1H2AD, HIST1H2AH, HIST1H2AJ, HIST1H2BA, HIST1H2BB, HIST1H2BH, HIST1H2BL, HIST1H2BM, HIST1H2BN, HIST1H2BO, HIST1H3A, HIST1H4A, HIST2H2AA3, HIST2H2BE, HIST2H2BF, HIST3H2A, HIST3H2BB…
GO:0004930	G-protein coupled receptor activity	GO_MolecularFunction	8.1e-10	4e-07	[ADGRE5, ADGRL2, ADORA2B, CCR4, CHRM1, CHRM2, CXCR2, CXCR3, CXCR5, CYSLTR2, DHX15, EDNRA, F2RL2, FFAR4, FSHR, FZD10, GLP1R, GPR132, GPR146, GPR37, GPR61, GPR68, GPR82, GPR85, GPRC5A, HRH4, HTR1D, HTR2C, KISS1R, LGR4, LPAR4, LPAR6, LTB4R2, NPY4R, OPN4, OPN5, OPRM1, OR4N4, OR51E1, OXTR, P2RY1, P2RY4, PDGFRB, PPARG, PTCH1, PTGDR, PTGER3, PTGFR, S1PR1, S1PR3, SFRP1, SORCS1, SSTR1, TAS2R20, TSHR]
GO:0004888	transmembrane signaling receptor activity	GO_MolecularFunction	5.4e-06	0.0006	[ABCA1, ACVRL1, ADGRE5, ADGRL2, ADORA2B, ANXA9, BMPR2, CCR4, CD44, CD5, CHRM1, CHRM2, CLCA2, CNGA1, CNGB1, CNGB3, CTSH, CXCR2, CXCR3, CXCR5, CYSLTR2, DHX15, EBI3, EDNRA, EGFR, ERBB3, F2RL2, F3, FAS, FFAR4, FGFR3, FLT4, FSHR, FZD10, GABRA2, GABRG2, GABRP, GLP1R, GLRA3, GLRB, GPR132, GPR146, GPR37, GPR61, GPR68, GPR82, GPR85, GPRC5A, GRIA2, GRIA3, GRIN2B, HFE2, HLA-DRA, HRH4, HTR1D, HTR2C, IFNAR1, …
GO:0003725	double-stranded RNA binding	GO_MolecularFunction	1.6e-05	0.0012	[A1CF, ACTN1, ADARB2, AGO3, AGO4, DDX58, DHX15, DICER1, EIF2AK2, HMGB1, LRRFIP1, LSM14A, MRPL44, MTDH, OAS2, PRKRIP1, STAU1, STAU2, TLR7, ZNF346]
GO:0004725	protein tyrosine phosphatase activity	GO_MolecularFunction	0.00038	0.01	[CDC14A, CDC14B, DUSP11, DUSP26, DUSP4, DUSP6, DUSP7, EYA1, HACD2, MTM1, NHLRC1, PGPEP1, POLG, PTP4A2, PTPN1, PTPN12, PTPN22, PTPRD, PTPRG, PTPRJ, PTPRK, PTPRQ, PTPRR, PTPRT, SSH1, SSH2, ZNF367]
GO:0003727	single-stranded RNA binding	GO_MolecularFunction	0.00037	0.011	[A1CF, ADARB2, AGO3, AGO4, ATXN1, CBX8, DDX3X, DDX58, HMGB1, HNRNPA1, HNRNPDL, IKZF1, LSM14A, RBM11, THRA, TIA1, TLR7, ZFP36]
GO:0015108	chloride transmembrane transporter activity	GO_MolecularFunction	0.0009	0.019	[ANO1, ANO5, BEST4, CLCA2, CLCN2, CLCNKA, CLCNKB, CLIC5, CLIC6, FXYD3, GABRA2, GABRG2, GABRP, GLRA3, GLRB, SLC12A3, SLC12A5, SLC12A6, SLC26A1, SLC26A3, SLC4A1, TTYH3]
GO:0042805	actinin binding	GO_MolecularFunction	0.0011	0.021	[CACNA1D, KCNA5, LRRC10, MYPN, NOL6, PALLD, PDLIM2, PDLIM5, PPARG, PTPRT, SYNPO2]
GO:0015103	inorganic anion transmembrane transporter activity	GO_MolecularFunction	0.0011	0.022	[ANO1, ANO5, BEST4, CLCA2, CLCN2, CLCNKA, CLCNKB, CLIC5, CLIC6, FXYD3, GABRA2, GABRG2, GABRP, GLRA3, GLRB, SLC12A3, SLC12A5, SLC12A6, SLC20A1, SLC26A1, SLC26A3, SLC34A2, SLC4A1, SLC4A4, SLC4A5, TTYH3]
GO:0003677	DNA binding	GO_MolecularFunction	0.0015	0.026	[A4GALT, AFF3, AGFG1, ARID1A, ARID4A, ARID4B, ARID5B, ARNTL, ASCL4, ASXL2, ATXN1, BACH1, BBX, BEND3, BPTF, CASP8AP2, CDC45, CDKN2A, CEBPG, CENPA, CHD2, CNRIP1, CREB1, CREBL2, CREBZF, CTNNB1, CUX1, CUX2, DBX2, DDX3X, DDX3Y, DDX58, DICER1, DLX6, DMRT1, DMRT3, DNASE1L1, DPF2, DR1, E2F5, EEPD1, EGFR, ELF5, ELK1, EN1, ENO1, EOMES, EP300, ERCC3, ERCC4, ESR1, ESRRG, ETV3, ETV3L, ETV5, FOSL1, FOSL2, FOXA…
GO:0003723	RNA binding	GO_MolecularFunction	0.0022	0.033	[A1CF, AARS2, ACAA2, ACTN1, ADARB2, AGFG1, AGO3, AGO4, AKAP1, ALDH6A1, ANGEL2, APOBEC2, APOBEC3B, APOBEC3G, AQR, ATXN1, ATXN2L, BICC1, BOLL, BTF3, BZW1, C1QBP, C1orf35, C1orf52, CARS, CBX8, CCT3, CDKN2A, CELF2, CHD2, CKAP4, CNGB1, CNOT4, COA6, CPSF4, CSTF1, DCP2, DDX17, DDX3X, DDX3Y, DDX5, DDX50, DDX51, DDX54, DDX58, DDX59, DHX15, DICER1, DIEXF, DSP, DUS3L, DUSP11, EEF1E1, EEF2K, EFTUD2, EIF2A, E…

## Sheet: Table S2b_GREEN MODULE
Table S2b: Gene ontologies enriched for target genes of miRNAs in the GREEN module
GOID	GOTerm	Ontology Source	Term PValue	Term PValue Corrected with Benjamini-Hochberg	Associated Genes
GO:0030154	cell differentiation	GO_BiologicalProcess	1.2e-06	0.00032	[ABCB5, ABI2, ABL2, ACTR2, ACVR2A, ACVR2B, ADAM8, ADAMTS1, ADD1, ADGRB3, ADGRF5, ADNP2, ALCAM, ANTXR1, APBB2, APC, APOB, ARF4, ARFGEF1, ARHGEF28, ATL1, ATP2B4, ATP7A, ATP8A2, ATRX, ATXN1, BCHE, BCL11A, BCL2L11, BEND6, BMPR1A, BTBD3, C1D, C1GALT1, CACNA1H, CAND1, CAPN2, CAPN5, CAPRIN1, CASP6, CASP9, CAT, CD28, CD53, CD9, CDC25B, CDC42, CDH11, CDH5, CDK5R1, CEP120, CHUK, CLN8, CNGB1, CNTF, CNTN4, C…
GO:0043412	macromolecule modification	GO_BiologicalProcess	2.3e-06	0.00045	[ABI2, ABL2, ACVR2A, ACVR2B, ADAM8, ADH5, ADM2, ALG10, ALG10B, ALG11, ALG13, ALG2, ALPK1, ANKIB1, ANKS1B, ANTXR1, APC, ARCN1, ARF4, ARFGEF1, ARIH1, ARPP19, ARRDC3, ASB7, ASB9, ATG4C, ATP2B4, ATP6AP2, ATP7A, ATRX, ATXN7, B4GALT5, B4GALT6, BCL11A, BET1, BMP2K, BMPR1A, BRD4, C1GALT1, CAND1, CBL, CCDC6, CCND2, CCND3, CCNG1, CDC14A, CDC14B, CDC25B, CDC42, CDC7, CDK5R1, CHUK, CMTR2, CNEP1R1, CNGB1, CNI…
GO:0035556	intracellular signal transduction	GO_BiologicalProcess	4.8e-06	0.00082	[ABI2, ABL2, ACTR2, ADAM8, AGO4, AKAP11, ANKS1B, ANTXR1, APBB2, APC, ARF4, ARFGEF1, ARHGAP31, ARHGAP32, ARHGEF28, ARHGEF3, ARPP19, ASB7, ASB9, ATP1B1, ATP2B4, ATP6AP2, ATRX, BCL2L11, BRD4, C3orf58, CASP9, CAT, CBL, CCDC6, CD28, CDC42, CDK5R1, CENPA, CHUK, CLIP1, CNIH3, CNTF, COPS5, COPS8, CTF1, CTH, CTR9, CUL4A, CXCL12, CYLD, DCDC1, DDAH1, DEPDC1B, DHDDS, DMPK, DOCK2, DOCK6, DOCK9, DSTYK, DUSP14,…
GO:0044260	cellular macromolecule metabolic process	GO_BiologicalProcess	7.4e-06	0.0011	[A2ML1, ABCE1, ABI2, ABL2, ACVR2A, ACVR2B, ADAM8, ADD1, ADH5, ADM2, ADNP2, AGL, AGO4, AHCYL1, AHSG, ALG10, ALG10B, ALG11, ALG13, ALG2, ALPK1, ANKIB1, ANKS1B, ANTXR1, APBB2, APC, APOB, ARCN1, ARF4, ARFGEF1, ARIH1, ARPP19, ARRDC3, ASB7, ASB9, ATF6, ATG4C, ATP2B4, ATP6AP2, ATP7A, ATRX, ATXN1, ATXN7, B4GALT5, B4GALT6, BAZ2B, BCHE, BCL11A, BCL2L11, BEND6, BET1, BMP2K, BMPR1A, BPTF, BRD3, BRD4, BRF2, C…
GO:0006464	cellular protein modification process	GO_BiologicalProcess	1.5e-05	0.0018	[ABI2, ABL2, ACVR2A, ACVR2B, ADAM8, ADH5, ADM2, ALG10, ALG10B, ALG11, ALG13, ALG2, ALPK1, ANKIB1, ANKS1B, ANTXR1, APC, ARCN1, ARF4, ARFGEF1, ARIH1, ARPP19, ARRDC3, ASB7, ASB9, ATG4C, ATP2B4, ATP6AP2, ATP7A, ATXN7, B4GALT5, B4GALT6, BCL11A, BET1, BMP2K, BMPR1A, BRD4, C1GALT1, CAND1, CBL, CCDC6, CCND2, CCND3, CCNG1, CDC14A, CDC14B, CDC25B, CDC42, CDC7, CDK5R1, CHUK, CNEP1R1, CNIH3, CNTF, COPS5, COP…
GO:0048699	generation of neurons	GO_BiologicalProcess	1.5e-05	0.002	[ABI2, ABL2, ACTR2, ADAMTS1, ADGRB3, ADNP2, ALCAM, APBB2, APC, ARF4, ARFGEF1, ARHGEF28, ATL1, ATP2B4, ATP7A, ATP8A2, ATXN1, BCHE, BCL11A, BEND6, BMPR1A, BTBD3, C1D, CACNA1H, CAPRIN1, CDC42, CDH11, CDK5R1, CLN8, CNGB1, CNTF, CNTN4, COL2A1, COL9A3, CPEB3, CTF1, CTNND2, CXCL12, DHDDS, DMRT3, DNMT1, DNMT3A, DST, EDNRB, ENTHD1, EPHA2, EPYC, ERBB3, EXT1, FBXO45, FGFR3, FLRT3, FOXA1, FRMD7, GLDN, GRB2, …
GO:0009893	positive regulation of metabolic process	GO_BiologicalProcess	1.8e-05	0.002	[ABL2, ACAP2, ACVR2A, ACVR2B, ADAM8, ADGRB3, ADGRF5, ADM2, ANGPTL3, ANKIB1, ANTXR1, APC, APOB, APOC4-APOC2, ARF4, ARFGEF1, ARHGAP31, ARHGAP32, ARHGEF28, ARHGEF3, ARIH1, ARPP19, ARRDC3, ASB9, ATF6, ATP1B1, ATP2B4, ATP7A, ATRX, ATXN1, ATXN7, BCL11A, BCL2L11, BMPR1A, BPTF, BRD4, CALCRL, CAND1, CASP9, CAT, CCDC62, CCND2, CCND3, CD28, CDC14B, CDC25B, CDC42, CDC7, CDK5R1, CHUK, CKAP2, CLPX, CNEP1R1, CN…
GO:0044267	cellular protein metabolic process	GO_BiologicalProcess	2e-05	0.0021	[A2ML1, ABI2, ABL2, ACVR2A, ACVR2B, ADAM8, ADD1, ADH5, ADM2, AGO4, AHSG, ALG10, ALG10B, ALG11, ALG13, ALG2, ALPK1, ANKIB1, ANKS1B, ANTXR1, APC, ARCN1, ARF4, ARFGEF1, ARIH1, ARPP19, ARRDC3, ASB7, ASB9, ATF6, ATG4C, ATP2B4, ATP6AP2, ATP7A, ATXN7, B4GALT5, B4GALT6, BCHE, BCL11A, BCL2L11, BET1, BMP2K, BMPR1A, BRD4, C1GALT1, CAND1, CAPN2, CAPRIN1, CASP9, CBL, CCDC6, CCND2, CCND3, CCNG1, CD28, CDC14A, …
GO:0007167	enzyme linked receptor protein signaling pathway	GO_BiologicalProcess	2.8e-05	0.0024	[ABL2, ACTR2, ACVR2A, ACVR2B, AGO4, AHSG, ARF4, ARHGEF28, ARHGEF3, ATP6V1A, ATXN1, ATXN7, BCL2L11, BMPR1A, C1D, CAPN5, CASP9, CBL, CD28, CDC42, CDH5, CDK5R1, CHUK, CTF1, DSTYK, EID2, EPHA2, ERBB3, ESM1, FGFR3, FKBP1A, FLRT3, FLT4, FOXO4, GDF9, GLG1, GNG7, GRB10, GRB2, HDAC2, HGF, HHEX, IFRD1, IL6ST, INHBB, IRS4, ITGA1, KALRN, KCNH8, KIDINS220, KIT, KITLG, LAMTOR5, LIFR, MAP3K1, MARK3, MCF2, MCF2L…
GO:0050906	detection of stimulus involved in sensory perception	GO_BiologicalProcess	3.1e-05	0.0025	[ATP2B4, ATP8A2, CCDC6, CNGB1, COL11A1, KIT, OR2H1, OR51E1, PCDH15, PTCH1, RPE65, SERPINE2, TRPA1]
GO:0022008	neurogenesis	GO_BiologicalProcess	3.7e-05	0.0027	[ABI2, ABL2, ACTR2, ADAMTS1, ADGRB3, ADNP2, ALCAM, APBB2, APC, ARF4, ARFGEF1, ARHGEF28, ATL1, ATP2B4, ATP7A, ATP8A2, ATXN1, BCHE, BCL11A, BEND6, BMPR1A, BTBD3, C1D, CACNA1H, CAPRIN1, CD9, CDC42, CDH11, CDK5R1, CEP120, CLN8, CNGB1, CNTF, CNTN4, COL2A1, COL9A3, CPEB3, CTF1, CTNND2, CXCL12, DHDDS, DMRT3, DNMT1, DNMT3A, DST, EDNRB, ENTHD1, EPHA2, EPYC, ERBB3, EXT1, FABP7, FBXO45, FGFR3, FLRT3, FOXA1,…
GO:0048646	anatomical structure formation involved in morphogenesis	GO_BiologicalProcess	3.6e-05	0.0028	[ACTR2, ACVR2B, ADAM8, ADAMTS1, ADGRB3, ADM2, ANGPTL3, ATP2B4, ATP7A, ATP8A2, BCL2L11, BMPR1A, C1GALT1, CACNA1H, CALCRL, CAPN2, CASP9, CD53, CD9, CDC14A, CDC42, CDK5R1, COL11A1, COL2A1, CTR9, CXCL12, CXCL13, CYLD, DDAH1, DVL3, DZIP1, ENPEP, EPHA2, ESM1, EXOC4, FKBP1A, FLT4, FOXA1, FOXO4, GRB2, HDAC2, HGF, HHEX, HIPK1, HMGB1, HOPX, HOXA7, ICK, IQCB1, IRX2, ITGA4, JAG1, KIF20B, KIF24, MACF1, MEOX2,…
GO:0048731	system development	GO_BiologicalProcess	4e-05	0.0028	[ABCB5, ABI2, ABL2, ACTR2, ACVR2A, ACVR2B, ADAM8, ADAMTS1, ADD1, ADGRB3, ADGRL2, ADM2, ADNP2, AHSG, ALCAM, ANGPTL3, ANO6, APBB2, APC, APOB, ARCN1, ARF4, ARFGEF1, ARHGEF28, ARRDC3, ATF6, ATL1, ATP2B4, ATP6AP2, ATP7A, ATP8A2, ATRX, ATXN1, BCHE, BCL11A, BCL2L11, BEND6, BMP2K, BMPR1A, BPTF, BSN, BTBD3, C1D, C1GALT1, C3orf58, CACNA1H, CALCRL, CAPN5, CAPRIN1, CASP9, CAT, CD28, CD9, CDC42, CDH11, CDH5, …
GO:0018193	peptidyl-amino acid modification	GO_BiologicalProcess	5.4e-05	0.0036	[ABI2, ABL2, ADH5, ALG10, ALG10B, ALG11, ALG13, ALG2, ANTXR1, ARCN1, ARF4, ATP2B4, ATP7A, B4GALT5, B4GALT6, BCL11A, BET1, BRD4, CDC42, CDC7, CDK5R1, CNIH3, CNTF, CSNK1A1, CSNK1G3, CTF1, CTH, CTR9, CTSA, DHDDS, DMPK, DNAJC24, DNMT1, DR1, DSTYK, DYDC1, EDEM1, EIF5A, EPHA2, ERBB3, FGFR3, FKBP1A, FLT4, FPGT, GALNT11, GALNT3, GOSR1, GRIA1, GSG2, HDAC2, HGF, IBTK, IFNA8, IL15, IL6R, IL6ST, KALRN, KIT, …
GO:0009790	embryo development	GO_BiologicalProcess	5.9e-05	0.0038	[ACVR2A, ACVR2B, ADD1, APOB, ATP2B4, ATP6AP2, ATP7A, ATP8A2, BCL2L11, BMPR1A, BPTF, BRD4, CAPN2, CCSAP, CDK5R1, COL11A1, COL2A1, CTR9, CUL4A, DLD, DNMT3A, DSC3, DVL3, EIF2S2, EPHA2, EXOC4, EXT1, FLNB, FLRT3, FOXA1, GNA12, GRB2, HDAC2, HHEX, HIPK1, HOPX, HOXA7, HOXA9, HOXB2, INVS, IRX2, IRX5, ITGA4, KIDINS220, KIF20B, KIT, KITLG, KMT2A, MACF1, MAFB, MAN2A1, MEOX2, MFAP2, MMP15, MMP9, MYH10, MYO1E,…
GO:0007186	G-protein coupled receptor signaling pathway	GO_BiologicalProcess	6.3e-05	0.0039	[ADGRB3, ADGRF5, ADGRG7, ADGRL2, ADM2, AHCYL1, ARPP19, ARRDC3, ATP2B4, C1D, CALCRL, CCDC6, CDK5R1, CHRM2, CNGB1, CXCL12, CXCL13, EDNRB, GABRA6, GALR1, GNA12, GNAI1, GNG4, GNG7, GPR37, GTF2H2, HHEX, HTR1F, HTR4, IQGAP2, LHCGR, LPAR3, LSM4, MRGPRF, NANOS1, NMU, OPN3, OPRK1, OR2H1, OR51E1, P2RY2, PDCL, PLEK, PRKCA, PTCH1, PTGER4, S1PR1, SNCA, SORT1, TMOD2, USP33]
GO:0048522	positive regulation of cellular process	GO_BiologicalProcess	7.4e-05	0.0042	[ABI2, ABI3BP, ABL2, ACTR2, ACVR2A, ACVR2B, ADAM8, ADAMTS1, ADGRB3, ADGRF5, ADGRL2, ADNP2, AHSG, ANGPTL3, ANKIB1, ANO6, ANTXR1, APBB2, APC, APOB, ARF4, ARFGEF1, ARFIP1, ARHGEF3, ARIH1, ARPP19, ARRDC3, ATF6, ATP1B1, ATP2B4, ATP6AP2, ATP8A1, ATP8A2, ATRX, ATXN1, ATXN7, BCL11A, BCL2L11, BEND6, BMPR1A, BPTF, BRD4, C9orf69, CA7, CACNA1H, CALCRL, CAND1, CAPRIN1, CASP9, CAT, CBL, CCDC62, CCND2, CCND3, C…
GO:0030182	neuron differentiation	GO_BiologicalProcess	8.8e-05	0.0049	[ABI2, ABL2, ACTR2, ADAMTS1, ADGRB3, ADNP2, ALCAM, APBB2, APC, ARF4, ARFGEF1, ARHGEF28, ATL1, ATP2B4, ATP7A, ATP8A2, BCL11A, BEND6, BTBD3, C1D, CACNA1H, CAPRIN1, CDC42, CDH11, CDK5R1, CLN8, CNGB1, CNTF, CNTN4, COL2A1, COL9A3, CPEB3, CTF1, CTNND2, CXCL12, DHDDS, DMRT3, DNMT1, DNMT3A, DST, EDNRB, ENTHD1, EPHA2, EPYC, ERBB3, EXT1, FBXO45, FGFR3, FLRT3, FOXA1, FRMD7, GLDN, GRB2, HCN1, HDAC2, HGF, HIP…
GO:0009966	regulation of signal transduction	GO_BiologicalProcess	9.8e-05	0.0052	[ABL2, ACVR2A, ACVR2B, ADAM8, AHSG, AKAP11, ANKS1B, ANTXR1, APC, ARFGEF1, ARHGAP31, ARHGAP32, ARHGEF28, ARHGEF3, ARPP19, ARRDC3, ATP2B4, ATP6AP2, ATXN1, ATXN7, BCL2L11, BEND6, BMPR1A, BRD4, C1D, C3orf58, CAPN5, CAT, CBL, CCDC6, CD28, CDC42, CDK5R1, CHAF1B, CHUK, CNGB1, CNIH3, CNTF, COL2A1, COPS5, COPS8, CSNK1A1, CTF1, CTH, CTNND2, CXCL12, CYLD, DACT3, DEPDC1B, DMPK, DSTYK, DUSP14, DUSP28, DVL3, E…
GO:0001654	eye development	GO_BiologicalProcess	0.0001	0.0055	[ABCB5, ABI2, ACVR2B, APC, ATF6, ATP2B4, ATP8A2, CLN8, CNTF, CRYGS, EPHA2, FGFR3, HCN1, HDAC2, HIPK1, IRX5, JAG1, KERA, MAN2A1, MAP3K1, MDM1, MFAP2, MTERF4, MYH10, NHS, NRP1, PKNOX1, POU4F2, RDH10, RPE65, RPGR, SDK2, SIPA1L3, SOX1, TBC1D32, TDRD7, TGFB2, TGFBR2, TOPORS, VAX1, VEGFA, YY1, ZEB1, ZEB2]
GO:0048666	neuron development	GO_BiologicalProcess	0.00011	0.0057	[ABI2, ABL2, ACTR2, ADAMTS1, ADGRB3, ALCAM, APBB2, APC, ARF4, ARFGEF1, ARHGEF28, ATL1, ATP2B4, ATP7A, ATP8A2, BCL11A, BTBD3, C1D, CACNA1H, CAPRIN1, CDC42, CDH11, CDK5R1, CNGB1, CNTF, CNTN4, COL2A1, COL9A3, CPEB3, CTF1, CTNND2, CXCL12, DHDDS, DST, EDNRB, ENTHD1, EPHA2, EPYC, ERBB3, EXT1, FBXO45, FGFR3, FLRT3, FRMD7, GLDN, GRB2, HCN1, HDAC2, HGF, HMGB1, IFRD1, INSM1, IRX5, ITGA1, KALRN, KERA, KIDIN…
GO:0048468	cell development	GO_BiologicalProcess	0.00013	0.0061	[ABI2, ABL2, ACTR2, ADAMTS1, ADGRB3, ALCAM, ANTXR1, APBB2, APC, ARF4, ARFGEF1, ARHGEF28, ATL1, ATP2B4, ATP7A, ATP8A2, ATRX, ATXN1, BCL11A, BCL2L11, BEND6, BMPR1A, BTBD3, C1D, C1GALT1, CACNA1H, CAPRIN1, CASP9, CD9, CDC25B, CDC42, CDH11, CDH5, CDK5R1, CNGB1, CNTF, CNTN4, COL11A1, COL2A1, COL9A3, CPEB3, CTF1, CTNND2, CXCL12, DACT3, DHDDS, DLD, DST, DZIP1, EDNRB, ENTHD1, EPHA2, EPYC, ERBB3, EXT1, FAM…
GO:1902531	regulation of intracellular signal transduction	GO_BiologicalProcess	0.00012	0.0062	[ABL2, ADAM8, AKAP11, ANKS1B, ANTXR1, APC, ARFGEF1, ARHGAP31, ARHGAP32, ARHGEF28, ARHGEF3, ARPP19, ATP2B4, ATP6AP2, BCL2L11, BRD4, C3orf58, CAT, CBL, CCDC6, CD28, CDC42, CDK5R1, CHUK, CNTF, COPS5, COPS8, CTF1, CTH, CXCL12, CYLD, DEPDC1B, DSTYK, DUSP14, DUSP28, DVL3, EEF1E1, EPHA2, ERBB3, FBXL2, FGA, FGFR3, FKBP1A, FLRT3, FLT4, FRMD7, GADD45A, GDF9, GNA12, GNAI1, GPR37, GRB2, GRIK2, HDAC2, HGF, HM…
GO:0010604	positive regulation of macromolecule metabolic process	GO_BiologicalProcess	0.00014	0.0065	[ABL2, ACVR2A, ACVR2B, ADAM8, ADM2, ANKIB1, ANTXR1, APC, APOB, ARF4, ARFGEF1, ARIH1, ARRDC3, ASB9, ATF6, ATP2B4, ATRX, ATXN1, ATXN7, BCL11A, BCL2L11, BMPR1A, BPTF, BRD4, CAND1, CASP9, CAT, CCDC62, CCND2, CCND3, CD28, CDC14B, CDC25B, CDC42, CDC7, CDK5R1, CHUK, CKAP2, CLPX, CNEP1R1, CNTF, COPS5, COPS8, CPEB3, CREB3L2, CSNK1A1, CTF1, CTH, CTR9, DCUN1D1, DEPDC1B, DLGAP5, DNMT1, DSTYK, DUSP28, DVL3, E…
GO:0090068	positive regulation of cell cycle process	GO_BiologicalProcess	0.00016	0.0071	[ATRX, BRD4, CD28, CDC25B, CDC42, CDC7, CDK5R1, CUL4A, DHDDS, DLGAP5, FOXO4, INSM1, KIF20B, MAP10, PCID2, PKD2, PKP4, PML, PRKCA, PSMA5, PSMB4, PSMD10, PSMD5, PSME4, PTEN, RACGAP1, RFWD2, SMC5, SOX4, SPAST, TERF1, TGFA, TMOD3]
GO:0031325	positive regulation of cellular metabolic process	GO_BiologicalProcess	0.00017	0.0077	[ABL2, ACVR2A, ACVR2B, ADAM8, ADGRF5, ANKIB1, ANTXR1, ARF4, ARFGEF1, ARIH1, ARPP19, ARRDC3, ATF6, ATP2B4, ATRX, ATXN1, ATXN7, BCL11A, BCL2L11, BMPR1A, BPTF, BRD4, CALCRL, CAND1, CASP9, CAT, CCDC62, CCND2, CCND3, CD28, CDC14B, CDC25B, CDC42, CDC7, CDK5R1, CHUK, CKAP2, CLPX, CNEP1R1, CNTF, COPS5, COPS8, CPEB3, CREB3L2, CSNK1A1, CTF1, CTH, CTR9, DCUN1D1, DDAH1, DEPDC1B, DLGAP5, DNMT1, DSTYK, DUSP28,…
GO:0007169	transmembrane receptor protein tyrosine kinase signaling pathway	GO_BiologicalProcess	0.00019	0.008	[ABL2, ACTR2, AGO4, AHSG, ARF4, ARHGEF28, ARHGEF3, ATP6V1A, ATXN1, ATXN7, BCL2L11, C1D, CASP9, CBL, CD28, CDC42, CDH5, CDK5R1, CHUK, DSTYK, EPHA2, ERBB3, ESM1, FGFR3, FLRT3, FLT4, FOXO4, GRB10, GRB2, HDAC2, HGF, HHEX, IRS4, ITGA1, KALRN, KCNH8, KIDINS220, KIT, KITLG, LAMTOR5, MARK3, MCF2, MCF2L, MMP9, MSTN, MYH10, MYH11, MYH7B, MYO1E, NOG, NPTN, NR4A3, NRP1, NUCKS1, PAK2, PDPK1, PHF14, PHLPP2, PI…
GO:0007423	sensory organ development	GO_BiologicalProcess	0.00022	0.0086	[ABCB5, ABI2, ACVR2B, APC, ATF6, ATP2B4, ATP8A2, BCL2L11, CLN8, CNTF, COL11A1, COL2A1, CRYGS, CXCL14, DVL3, EPHA2, FGFR3, HCN1, HDAC2, HIPK1, IRX5, JAG1, KERA, MAFB, MAN2A1, MAP3K1, MDM1, MFAP2, MTERF4, MYCL, MYH10, NHS, NOG, NOX3, NR4A3, NRP1, PCDH15, PKNOX1, POU4F2, PTPN11, RDH10, RPE65, RPGR, SDK2, SEC24B, SIPA1L3, SIX4, SOX1, TBC1D32, TDRD7, TGFB2, TGFBR2, TOPORS, VAX1, VEGFA, WNT1, YY1, ZEB1…
GO:0022402	cell cycle process	GO_BiologicalProcess	0.00021	0.0086	[ACTR2, ANTXR1, APBB2, APC, ARPP19, ATP2B4, ATRX, BCAT1, BCL2L11, BORA, BRD4, CCND2, CCND3, CCNG1, CCNG2, CCSAP, CD28, CDC14A, CDC14B, CDC25B, CDC42, CDC7, CDK5R1, CENPA, CEP120, CEP55, CGRRF1, CHD3, CHMP4C, CKAP2, CLIP1, CNEP1R1, CNTD1, CSNK1A1, CUL4A, DEPDC1B, DHDDS, DLGAP5, DST, DUSP13, FBXO43, FGFR3, FOXN3, FOXO4, GADD45A, GEM, GSG2, HGF, HORMAD2, INSM1, JMY, KIF20A, KIF20B, KMT2E, LAMTOR5, M…
GO:0060255	regulation of macromolecule metabolic process	GO_BiologicalProcess	0.00023	0.009	[A2ML1, ABL2, ACVR2A, ACVR2B, ADAM8, ADM2, ADNP2, AGO4, AHCYL1, AHSG, ANKIB1, ANKS1B, ANTXR1, APBB2, APC, APOB, ARF4, ARFGEF1, ARIH1, ARPP19, ARRDC3, ASB9, ATF6, ATP1B1, ATP2B4, ATP6AP2, ATP7A, ATRX, ATXN1, ATXN7, BAZ2B, BCL11A, BCL2L11, BEND6, BMPR1A, BPTF, BRD3, BRD4, BRF2, C1D, CAND1, CAPN5, CAPRIN1, CASP9, CAT, CBL, CCDC6, CCDC62, CCND2, CCND3, CCNG1, CD28, CDC14B, CDC25B, CDC42, CDC7, CDK5R1…
GO:0007600	sensory perception	GO_BiologicalProcess	0.00025	0.009	[ABCC6, ATF6, ATP2B4, ATP8A2, ATXN7, CCDC6, CLN8, CNGB1, CNTN5, COL11A1, COL2A1, EDNRB, EML2, EYA3, IRX5, KERA, KIT, MYH7B, NANOS1, NMU, NOV, NUDT19, OPRK1, OR2H1, OR51E1, P2RY2, PCDH15, PDCL, POU4F2, PTCH1, PTGS2, RDH10, RDH12, RPE65, RPGR, SERPINE2, SOX14, TRPA1]
GO:0061640	cytoskeleton-dependent cytokinesis	GO_BiologicalProcess	0.00025	0.0093	[ACTR2, APC, CEP55, CKAP2, KIF20A, KIF20B, MYH10, RACGAP1, SPTBN1, USP8]
GO:0006488	dolichol-linked oligosaccharide biosynthetic process	GO_BiologicalProcess	0.0003	0.01	[ALG10, ALG10B, ALG11, ALG13, ALG2, CTSA, DHDDS, FPGT, NPL, PGM3, RFT1, SLC35A1, ST3GAL5, ST8SIA3]
GO:0043010	camera-type eye development	GO_BiologicalProcess	0.00039	0.011	[ABI2, ACVR2B, APC, ATP2B4, ATP8A2, CLN8, CRYGS, EPHA2, FGFR3, HCN1, HDAC2, HIPK1, IRX5, JAG1, KERA, MAN2A1, MAP3K1, MDM1, MTERF4, MYH10, NHS, NRP1, PKNOX1, POU4F2, RDH10, RPE65, RPGR, SDK2, SOX1, TBC1D32, TDRD7, TGFBR2, TOPORS, VAX1, VEGFA, YY1, ZEB1, ZEB2]
GO:0010646	regulation of cell communication	GO_BiologicalProcess	0.0004	0.011	[ABL2, ACVR2A, ACVR2B, ADAM8, AHSG, AKAP11, ANKS1B, ANTXR1, APC, ARFGEF1, ARHGAP31, ARHGAP32, ARHGEF28, ARHGEF3, ARPP19, ARRDC3, ATP2B4, ATP6AP2, ATXN1, ATXN7, BCHE, BCL2L11, BEND6, BMPR1A, BRD4, C1D, C3orf58, CA7, CAPN5, CAT, CBL, CCDC6, CD28, CDC42, CDK5R1, CHAF1B, CHUK, CNGB1, CNIH3, CNTF, CNTN4, COL2A1, COPS5, COPS8, CPEB3, CSNK1A1, CTF1, CTH, CTNND2, CTSK, CXCL12, CYLD, DACT3, DEPDC1B, DMPK,…
GO:0006887	exocytosis	GO_BiologicalProcess	0.00035	0.011	[ARFGEF1, CACNA1H, CD9, COPS5, ENTHD1, EXOC4, EXOC8, FGA, HGF, JAGN1, KIT, LAMP2, MMRN1, MYH10, NR4A3, PCLO, PDCD6IP, PDPK1, PIK3C2A, PIKFYVE, PLA2G3, PLEK, PROS1, RAB11B, RAB21, RAB27A, RAB2B, RAB8B, RALA, SCRN3, SGCG, SNAPIN, SNCA, SNF8, STAM, STX2, SYNJ1, SYTL5, TGFB2, TRIM9, TTN, VEGFA, VMP1, VSNL1]
GO:0045787	positive regulation of cell cycle	GO_BiologicalProcess	0.00039	0.011	[ATRX, BCL2L11, BRD4, CCND2, CCND3, CD28, CDC25B, CDC42, CDC7, CDK5R1, CUL4A, DHDDS, DLGAP5, FOXA1, FOXO4, INSM1, KIF20B, MAP10, NR4A3, PCID2, PKD2, PKP4, PML, PRKCA, PSMA5, PSMB4, PSMD10, PSMD5, PSME4, PTEN, PTPN11, RACGAP1, RFWD2, SMC5, SOX4, SPAST, TERF1, TGFA, TGFB2, TMOD3]
GO:0032989	cellular component morphogenesis	GO_BiologicalProcess	0.00033	0.011	[ABL2, ACTR2, ADAM8, ADD1, ADGRB3, ALCAM, ANTXR1, APBB2, APC, ARHGEF28, ATL1, ATP2B4, ATP7A, ATP8A2, BCL11A, BTBD3, C5orf30, CACNA1H, CAPRIN1, CASP9, CD9, CDC14A, CDC42, CDH11, CDK5R1, CNTN4, COL2A1, COL9A3, CSNK1A1, CTNND2, CXCL12, CYLD, DACT3, DHDDS, DST, DZIP1, ENTHD1, EPHA2, EPYC, ERBB3, EXT1, FAM21C, FBXO45, FGA, FGFR3, FLNB, FLRT3, FOXA1, GALNT11, GNA12, GRB2, HDAC2, HGF, ICK, IFRD1, IQCB1,…
GO:0007399	nervous system development	GO_BiologicalProcess	0.00037	0.011	[ABI2, ABL2, ACTR2, ADAMTS1, ADGRB3, ADGRL2, ADNP2, ALCAM, APBB2, APC, APOB, ARCN1, ARF4, ARFGEF1, ARHGEF28, ATL1, ATP2B4, ATP6AP2, ATP7A, ATP8A2, ATRX, ATXN1, BCHE, BCL11A, BCL2L11, BEND6, BMPR1A, BPTF, BSN, BTBD3, C1D, CACNA1H, CAPRIN1, CD9, CDC42, CDH11, CDK5R1, CEP120, CHRM2, CLN8, CNGB1, CNTF, CNTN4, COL2A1, COL9A3, CPEB3, CTF1, CTNND2, CXCL12, DHDDS, DMRT3, DNMT1, DNMT3A, DST, DVL3, EDNRB, …
GO:0032990	cell part morphogenesis	GO_BiologicalProcess	0.00039	0.011	[ABL2, ACTR2, ADGRB3, ALCAM, APBB2, APC, ARHGEF28, ATL1, ATP7A, ATP8A2, BCL11A, BTBD3, C5orf30, CACNA1H, CAPRIN1, CDC14A, CDC42, CDH11, CDK5R1, CNTN4, COL2A1, COL9A3, CTNND2, CXCL12, CYLD, DHDDS, DST, DZIP1, ENTHD1, EPHA2, EPYC, ERBB3, EXT1, FBXO45, FGFR3, FLRT3, GALNT11, GRB2, ICK, IFRD1, IQCB1, ITGA1, KALRN, KERA, KIDINS220, KIF20B, KIF24, KIT, KITLG, LIFR, LPAR3, LRRC70, MACF1, MARK3, MMP9, MY…
GO:0048513	animal organ development	GO_BiologicalProcess	0.00035	0.011	[ABCB5, ABI2, ABL2, ACVR2A, ACVR2B, ADAM8, ADAMTS1, ADD1, AHSG, ANO6, APC, ARCN1, ARF4, ARRDC3, ATF6, ATP2B4, ATP7A, ATP8A2, ATRX, ATXN1, BCL11A, BCL2L11, BMP2K, BMPR1A, BPTF, BTBD3, C1D, C1GALT1, C3orf58, CACNA1H, CALCRL, CAPN5, CASP9, CAT, CD28, CD9, CDC42, CDK5R1, CEP120, CHUK, CLN8, CNTF, CNTN4, COL11A1, COL24A1, COL2A1, COL9A3, CREB3L2, CRYGS, CTF1, CTR9, CUL4A, CXCL12, CXCL13, CXCL14, CYLD,…
GO:0019538	protein metabolic process	GO_BiologicalProcess	0.00037	0.011	[A2ML1, ABI2, ABL2, ACVR2A, ACVR2B, ADAM8, ADAMTS1, ADD1, ADH5, ADM2, AGO4, AHSG, ALG10, ALG10B, ALG11, ALG13, ALG2, ALPK1, ANKIB1, ANKS1B, ANTXR1, APC, APOB, ARCN1, ARF4, ARFGEF1, ARIH1, ARPP19, ARRDC3, ASB7, ASB9, ATF6, ATG4C, ATP2B4, ATP6AP2, ATP7A, ATXN7, B4GALT5, B4GALT6, BCHE, BCL11A, BCL2L11, BET1, BMP2K, BMPR1A, BRD4, C1D, C1GALT1, C9orf3, CAND1, CAPN14, CAPN2, CAPN5, CAPRIN1, CASP6, CASP…
GO:0000910	cytokinesis	GO_BiologicalProcess	0.00045	0.012	[ACTR2, APC, CCND2, CCND3, CDC25B, CDC42, CEP55, CHMP4C, CKAP2, DHDDS, KIF20A, KIF20B, MAP10, MYH10, NOX5, PKD2, PKP4, PSMD10, RACGAP1, RALA, SPAST, SPTBN1, USP8, ZFYVE26]
GO:0048008	platelet-derived growth factor receptor signaling pathway	GO_BiologicalProcess	0.00043	0.012	[ABL2, C1D, MYO1E, NRP1, PHF14, PIK3C2A, PTEN, PTPN11, SNCA, TIPARP, VEGFA]
GO:1902589	single-organism organelle organization	GO_BiologicalProcess	0.00051	0.013	[ABI2, ABL2, ACTR2, ADD1, ALPK1, ANTXR1, APC, ARCN1, ARFGEF1, ARFIP1, ARHGEF28, ARPP19, ATG4C, ATP1B1, ATP8A1, ATP8A2, ATRX, ATXN7, BCL2L11, BET1, BORA, BRD4, C1D, CA7, CAPZA1, CCNG1, CCNG2, CCSAP, CD28, CDC14A, CDC25B, CDC42, CDK5R1, CENPA, CEP120, CEP55, CHAF1B, CHD3, CHMP4C, CISD2, CKAP2, CLIP1, CLN8, CLVS1, CNGB1, CNIH3, CNTD1, CSNK1A1, CTR9, CTSK, CXCL12, CYLD, DEPDC1B, DHDDS, DLGAP5, DNMT1,…
GO:0048858	cell projection morphogenesis	GO_BiologicalProcess	0.00055	0.014	[ABL2, ACTR2, ADGRB3, ALCAM, APBB2, APC, ARHGEF28, ATL1, ATP7A, ATP8A2, BCL11A, BTBD3, C5orf30, CACNA1H, CAPRIN1, CDC14A, CDC42, CDH11, CDK5R1, CNTN4, COL2A1, COL9A3, CTNND2, CXCL12, CYLD, DHDDS, DST, DZIP1, ENTHD1, EPHA2, EPYC, ERBB3, EXT1, FBXO45, FGFR3, FLRT3, GALNT11, GRB2, ICK, IFRD1, IQCB1, ITGA1, KALRN, KERA, KIDINS220, KIF20B, KIF24, KIT, KITLG, LIFR, LPAR3, LRRC70, MACF1, MARK3, MMP9, MY…
GO:0018279	protein N-linked glycosylation via asparagine	GO_BiologicalProcess	0.00062	0.015	[ALG10, ALG10B, ALG11, ALG13, ALG2, ARCN1, ARF4, B4GALT5, B4GALT6, BET1, CNIH3, CTSA, DHDDS, EDEM1, FPGT, GOSR1, GRIA1, LMAN1, MAN1A2, MAN2A1, MANEA, NPL, PGM3, RAB1A, RFT1, SEC24B, SLC35A1, SPTBN1, ST3GAL5, ST8SIA3, TGFA]
GO:0048729	tissue morphogenesis	GO_BiologicalProcess	0.0007	0.017	[ABL2, ATP7A, ATP8A2, BMPR1A, CDC42, CHUK, COL11A1, CRYGS, CXCL12, DVL3, EPHA2, EXOC4, FGFR3, FKBP1A, FLRT3, FOXA1, GPC6, GRB2, HCN1, HGF, HHEX, HIPK1, HOXB2, IRX2, IRX5, JAG1, KIF20B, MACF1, MAN2A1, MAP3K1, MYLK, NCOA3, NKX2-1, NOG, NPNT, NR4A3, NRP1, PCDH15, PDHX, PKD2, PML, PRKAR1A, PTCH1, RAB23, RALA, RDH10, RPE65, RPGR, RYR2, S1PR1, SDK2, SEC24B, SIX4, SMAD1, SOX4, SPINT2, TCF21, TGFB2, TGFB…
GO:0098813	nuclear chromosome segregation	GO_BiologicalProcess	0.00074	0.018	[ACTR2, APC, ATRX, CDC42, CEP55, CHMP4C, DHDDS, DLGAP5, GEM, GSG2, HORMAD2, MAU2, MEIOB, PAPD7, PCID2, PDCD6IP, PTEN, PTTG1, RACGAP1, SGOL2, SMC2, SMC4, SMC5, SYCP1, SYCP2, TERF1, TEX15, TTN]
GO:0031175	neuron projection development	GO_BiologicalProcess	0.00085	0.019	[ABI2, ABL2, ACTR2, ADAMTS1, ADGRB3, ALCAM, APBB2, APC, ARF4, ARFGEF1, ARHGEF28, ATL1, ATP7A, ATP8A2, BCL11A, BTBD3, C1D, CACNA1H, CAPRIN1, CDC42, CDH11, CDK5R1, CNTN4, COL2A1, COL9A3, CPEB3, CTNND2, CXCL12, DHDDS, DST, ENTHD1, EPHA2, EPYC, ERBB3, EXT1, FBXO45, FGFR3, FLRT3, FRMD7, GRB2, HDAC2, HGF, HMGB1, IFRD1, ITGA1, KALRN, KERA, KIDINS220, KIF20B, KIT, KITLG, KLHL1, LIFR, LPAR3, LRRC70, MACF1…
GO:0048598	embryonic morphogenesis	GO_BiologicalProcess	0.00091	0.02	[ACVR2A, ACVR2B, ATP2B4, ATP8A2, BCL2L11, BMPR1A, COL11A1, COL2A1, CTR9, DLD, DVL3, EPHA2, EXOC4, EXT1, FLRT3, GNA12, GRB2, HDAC2, HHEX, HIPK1, HOXA7, HOXA9, HOXB2, IRX2, IRX5, ITGA4, KIF20B, MACF1, MAFB, MFAP2, MMP15, MMP9, NCOA3, NOG, NR4A3, NRP1, PCDH15, PDHX, PKD2, PLPP3, PRKAR1A, PTCH1, RAB23, RALA, RDH10, RECK, RYR2, SEC24B, SIX4, SLC39A1, SMAD1, SOX4, SPINT2, TBC1D32, TCF21, TGFBR2, TMEM10…
GO:0048844	artery morphogenesis	GO_BiologicalProcess	0.00095	0.02	[ANGPTL3, APOB, C1D, JAG1, MYLK, NRP1, PKD2, PTGER4, SEC24B, SOX4, VEGFA]
GO:0080090	regulation of primary metabolic process	GO_BiologicalProcess	0.0009	0.02	[A2ML1, ABL2, ACVR2A, ACVR2B, ADAM8, ADGRF5, ADNP2, AGO4, AHCYL1, AHSG, ANGPTL3, ANKIB1, ANKS1B, ANTXR1, APBB2, APC, APOB, ARF4, ARFGEF1, ARIH1, ARPP19, ARRDC3, ASB9, ATF6, ATP2B4, ATP6AP2, ATP7A, ATRX, ATXN1, ATXN7, BAZ2B, BCL11A, BCL2L11, BEND6, BMPR1A, BPTF, BRD3, BRD4, BRF2, C1D, CALCRL, CAND1, CAPN5, CAPRIN1, CASP9, CAT, CBL, CCDC6, CCDC62, CCND2, CCND3, CCNG1, CD28, CDC14B, CDC25B, CDC42, C…
GO:0034645	cellular macromolecule biosynthetic process	GO_BiologicalProcess	0.0009	0.02	[ACVR2A, ACVR2B, ADAM8, ADNP2, AGL, AGO4, ALG10, ALG10B, ALG11, ALG13, ALG2, ANTXR1, APBB2, APOB, ARCN1, ARF4, ARFGEF1, ATF6, ATG4C, ATP2B4, ATP7A, ATRX, ATXN1, ATXN7, B4GALT5, B4GALT6, BAZ2B, BCL11A, BEND6, BET1, BMPR1A, BPTF, BRD3, BRD4, BRF2, C1D, C1GALT1, CAND1, CAPN5, CAPRIN1, CAT, CBL, CCDC62, CD28, CDC42, CDC7, CDK5R1, CHAF1B, CHD3, CHD9, CHUK, CKAP2, CNGB1, CNIH3, COMMD6, COPS5, CPEB3, CP…
GO:0070848	response to growth factor	GO_BiologicalProcess	0.001	0.021	[ACAP2, ACVR2A, ACVR2B, AGO4, APC, ARHGEF3, BCL2L11, BMPR1A, BPTF, CAPN5, CASP9, CAT, CBL, CD28, CDH5, CHUK, COL2A1, CXCL13, DNMT1, DSTYK, EID2, EPHA2, ERBB3, FGFR3, FKBP1A, FLRT3, FLT4, FOXO4, GDF9, GLG1, GRB10, GRB2, HDAC2, HGF, HHEX, KALRN, KCNH8, KIDINS220, KIT, KITLG, MAP3K1, MARK3, MCF2, MCF2L, MSTN, MYO1E, NANOS1, NKX2-1, NOG, NPNT, NPTN, NRP1, ONECUT1, P2RY2, PDPK1, PEG10, PHLPP2, PML, PP…
GO:0031323	regulation of cellular metabolic process	GO_BiologicalProcess	0.001	0.021	[A2ML1, ABL2, ACVR2A, ACVR2B, ADAM8, ADGRF5, ADNP2, AGO4, AHCYL1, AHSG, ANKIB1, ANKS1B, ANTXR1, APBB2, APC, ARF4, ARFGEF1, ARIH1, ARPP19, ARRDC3, ATF6, ATP2B4, ATP6AP2, ATP7A, ATRX, ATXN1, ATXN7, BAZ2B, BCL11A, BCL2L11, BEND6, BMPR1A, BPTF, BRD3, BRD4, BRF2, C1D, CALCRL, CAND1, CAPN5, CAPRIN1, CASP9, CAT, CBL, CCDC6, CCDC62, CCND2, CCND3, CCNG1, CD28, CDC14B, CDC25B, CDC42, CDC7, CDK5R1, CHAF1B, …
GO:0060840	artery development	GO_BiologicalProcess	0.001	0.022	[ACVR2B, ANGPTL3, APOB, C1D, JAG1, LRP2, MYH10, MYLK, NRP1, PKD2, PTGER4, SEC24B, SOX4, VEGFA]
GO:0071363	cellular response to growth factor stimulus	GO_BiologicalProcess	0.0011	0.022	[ACAP2, ACVR2A, ACVR2B, AGO4, APC, ARHGEF3, BCL2L11, BMPR1A, BPTF, CAPN5, CASP9, CAT, CBL, CD28, CDH5, CHUK, COL2A1, CXCL13, DNMT1, DSTYK, EID2, ERBB3, FGFR3, FKBP1A, FLRT3, FLT4, FOXO4, GDF9, GLG1, GRB10, GRB2, HDAC2, HGF, HHEX, KALRN, KCNH8, KIDINS220, KIT, KITLG, MAP3K1, MARK3, MCF2, MCF2L, MSTN, MYO1E, NANOS1, NKX2-1, NOG, NPNT, NPTN, NRP1, ONECUT1, PDPK1, PEG10, PHLPP2, PML, PPM1A, PPP1CB, P…
GO:0010647	positive regulation of cell communication	GO_BiologicalProcess	0.0011	0.022	[ABL2, ACVR2A, ACVR2B, ADAM8, ANTXR1, APC, ARFGEF1, ARPP19, ARRDC3, ATP6AP2, BCL2L11, BMPR1A, BRD4, CA7, CAT, CBL, CD28, CDC42, CHAF1B, CHUK, CNTF, COPS8, CSNK1A1, CTF1, CTH, CYLD, DEPDC1B, DSTYK, DVL3, EEF1E1, ERBB3, ESM1, FGA, FGFR3, FKBP1A, FLNB, FLT4, FOXA1, FRMD7, GADD45A, GALR1, GDF9, GPR37, GRB10, GRB2, GRIK2, HDAC2, HGF, HHEX, HMGB1, IL15, IL6R, IL6ST, INHBB, IRAK4, IRS4, ITGA1, JAG1, KAL…
GO:0048667	cell morphogenesis involved in neuron differentiation	GO_BiologicalProcess	0.0011	0.022	[ABL2, ACTR2, ADGRB3, ALCAM, APBB2, APC, ARHGEF28, ATL1, ATP2B4, ATP7A, ATP8A2, BCL11A, BTBD3, CACNA1H, CAPRIN1, CDC42, CDH11, CDK5R1, CNTN4, COL2A1, COL9A3, CTNND2, CXCL12, DHDDS, DST, ENTHD1, EPHA2, EPYC, ERBB3, EXT1, FBXO45, FGFR3, GRB2, IFRD1, ITGA1, KALRN, KERA, KIDINS220, KIT, KITLG, LPAR3, LRRC70, MACF1, MARK3, MMP9, MYH10, MYH11, MYH7B, NKX2-1, NOG, NR4A3, NRP1, PAK2, PCDH15, PLXNA4, POU4…
GO:0009059	macromolecule biosynthetic process	GO_BiologicalProcess	0.0011	0.022	[ACVR2A, ACVR2B, ADAM8, ADNP2, AGL, AGO4, ALG10, ALG10B, ALG11, ALG13, ALG2, ANTXR1, APBB2, APOB, ARCN1, ARF4, ARFGEF1, ATF6, ATG4C, ATP2B4, ATP7A, ATRX, ATXN1, ATXN7, B4GALT5, B4GALT6, BAZ2B, BCL11A, BEND6, BET1, BMPR1A, BPTF, BRD3, BRD4, BRF2, C1D, C1GALT1, CAND1, CAPN5, CAPRIN1, CAT, CBL, CCDC62, CD28, CDC42, CDC7, CDK5R1, CHAF1B, CHD3, CHD9, CHST2, CHUK, CKAP2, CNGB1, CNIH3, COMMD6, COPS5, CP…
GO:0045667	regulation of osteoblast differentiation	GO_BiologicalProcess	0.001	0.022	[ACVR2A, ACVR2B, APC, BMPR1A, HGF, IL6R, IL6ST, JAG1, LSM4, NBR1, NOG, NPNT, PRKCA, PRKD1, PTCH1, PTGER4, SMAD1, TOB1]
GO:0000904	cell morphogenesis involved in differentiation	GO_BiologicalProcess	0.0012	0.023	[ABL2, ACTR2, ADGRB3, ALCAM, ANTXR1, APBB2, APC, ARHGEF28, ATL1, ATP2B4, ATP7A, ATP8A2, BCL11A, BTBD3, CACNA1H, CAPRIN1, CASP9, CDC42, CDH11, CDK5R1, CNTN4, COL2A1, COL9A3, CTNND2, CXCL12, DACT3, DHDDS, DST, ENTHD1, EPHA2, EPYC, ERBB3, EXT1, FAM21C, FBXO45, FGA, FGFR3, FLNB, FOXA1, GRB2, HDAC2, HGF, IFRD1, ITGA1, ITGA4, KALRN, KERA, KIDINS220, KIT, KITLG, LPAR3, LRRC70, MACF1, MAP3K1, MARK3, MFAP…
GO:0023056	positive regulation of signaling	GO_BiologicalProcess	0.0013	0.024	[ABL2, ACVR2A, ACVR2B, ADAM8, ANTXR1, APC, ARFGEF1, ARPP19, ARRDC3, ATP6AP2, BCL2L11, BMPR1A, BRD4, CA7, CAT, CBL, CD28, CDC42, CHAF1B, CHUK, CNTF, COPS8, CSNK1A1, CTF1, CTH, CYLD, DEPDC1B, DSTYK, DVL3, EEF1E1, ERBB3, ESM1, FGA, FGFR3, FKBP1A, FLNB, FLT4, FOXA1, FRMD7, GADD45A, GALR1, GDF9, GPR37, GRB10, GRB2, GRIK2, HDAC2, HGF, HHEX, HMGB1, IL15, IL6R, IL6ST, INHBB, IRAK4, IRS4, ITGA1, JAG1, KAL…
GO:0051302	regulation of cell division	GO_BiologicalProcess	0.0013	0.024	[APC, ATRX, BORA, CAT, CCND2, CCND3, CCSAP, CD28, CDC14A, CDC25B, CDC42, CHMP4C, DHDDS, DLGAP5, FBXO43, FGFR3, KIF20B, MAP10, NCOA3, PCID2, PDCD6IP, PKD2, PKP4, PRKAR1A, PSMD10, PTCH1, PTEN, PTTG1, RACGAP1, SMC5, SPAST, TERF1, TGFA, TGFB2, TOM1L1, VEGFA]
GO:0000902	cell morphogenesis	GO_BiologicalProcess	0.0014	0.025	[ABL2, ACTR2, ADAM8, ADD1, ADGRB3, ALCAM, ANTXR1, APBB2, APC, ARHGEF28, ATL1, ATP2B4, ATP7A, ATP8A2, BCL11A, BTBD3, C5orf30, CACNA1H, CAPRIN1, CASP9, CDC14A, CDC42, CDH11, CDK5R1, CNTN4, COL2A1, COL9A3, CSNK1A1, CTNND2, CXCL12, CYLD, DACT3, DHDDS, DST, DZIP1, ENTHD1, EPHA2, EPYC, ERBB3, EXT1, FAM21C, FBXO45, FGA, FGFR3, FLNB, FLRT3, FOXA1, GALNT11, GNA12, GRB2, HDAC2, HGF, ICK, IFRD1, IQCB1, ITGA…
GO:0032467	positive regulation of cytokinesis	GO_BiologicalProcess	0.0014	0.025	[CDC25B, CDC42, DHDDS, KIF20B, MAP10, PKP4, RACGAP1, SPAST]
GO:0043254	regulation of protein complex assembly	GO_BiologicalProcess	0.0014	0.025	[ABI2, ACTR2, ADD1, APC, ARFGEF1, ARFIP1, BCL11A, BCL2L11, CAND1, CAPZA1, CCSAP, CDC42, CHAF1B, CHMP4C, CLIP1, CRBN, CXCL13, EML2, FAM21C, GRB2, HMGB1, INSM1, IQGAP2, JMY, MAP3K1, MMP1, PDCD6IP, PLEK, PPM1A, PTGER4, PTPN11, SAR1A, SEC24B, SENP6, SNCA, SPTBN1, TERF1, TMOD2, TMOD3, TRIM9, VEGFA]
GO:0042770	signal transduction in response to DNA damage	GO_BiologicalProcess	0.0014	0.026	[ANTXR1, ATRX, CASP9, EEF1E1, GADD45A, GRB2, MMAB, NBN, PLA2R1, PML, PSMA5, PSMB4, PSMD10, PSMD5, PSME4, RFWD2, SOX4, USP32, WNT1]
GO:0030278	regulation of ossification	GO_BiologicalProcess	0.0015	0.026	[ACVR2A, ACVR2B, AHSG, ANO6, APC, BMP2K, BMPR1A, HGF, IL6R, IL6ST, JAG1, LSM4, NBR1, NOG, NPNT, P2RY2, PRKCA, PRKD1, PTCH1, PTGER4, S1PR1, SMAD1, TGFB2, TOB1]
GO:0034502	protein localization to chromosome	GO_BiologicalProcess	0.0016	0.027	[ANTXR1, ATRX, CENPA, ESCO2, GSG2, MMAB, PML, RAD21, TERF1, TEX15, TNKS2]
GO:0031333	negative regulation of protein complex assembly	GO_BiologicalProcess	0.0016	0.027	[ADD1, ARFGEF1, BCL11A, CAPZA1, CDC42, CRBN, EML2, FAM21C, HMGB1, PPM1A, PTGER4, SAR1A, SNCA, SPTBN1, TMOD2, TMOD3, TRIM9]
GO:0045595	regulation of cell differentiation	GO_BiologicalProcess	0.0017	0.027	[ABL2, ACVR2A, ACVR2B, ADAM8, ADAMTS1, ADGRB3, APC, APOB, ATP8A2, ATXN1, BCL11A, BEND6, BMPR1A, C1D, CAPRIN1, CD28, CD53, CDC42, CDH5, CDK5R1, CNTF, CNTN4, CPEB3, CTH, CTR9, CUL4A, CXCL12, CXCL14, CYLD, DACT3, DHDDS, DMPK, EDNRB, EPYC, FAM21C, FGA, FGFR3, FOXA1, FOXO4, FRMD7, FTO, GLG1, HDAC2, HGF, HMG20A, HMGB1, HOPX, HOXA7, HOXA9, IFRD1, IL15, IL17D, IL6R, IL6ST, INPP4B, INSM1, IQCB1, JAG1, KID…
GO:0000280	nuclear division	GO_BiologicalProcess	0.0017	0.028	[ACTR2, APC, ARPP19, ATRX, BCL2L11, BORA, CCNG1, CCNG2, CCSAP, CD28, CDC14A, CDC25B, CDC42, CEP55, CHMP4C, CLIP1, CNTD1, CSNK1A1, DEPDC1B, DHDDS, DLGAP5, DUSP13, FBXO43, FGFR3, GEM, GSG2, HGF, HORMAD2, KIF20B, MAP10, MAU2, MEIOB, MIS18BP1, PAPD7, PCID2, PDCD6IP, PIM2, PRKAR1A, PTEN, PTTG1, RACGAP1, RAD21, SGOL2, SMC2, SMC4, SMC5, SUGT1, SYCP1, SYCP2, TERF1, TEX15, TGFA, TOM1L1, TTN, USP37, XIAP]
GO:0032886	regulation of microtubule-based process	GO_BiologicalProcess	0.0021	0.032	[APC, BORA, CCSAP, CDC42, CDK5R1, CEP120, CHMP4C, CKAP2, CLIP1, CYLD, EML2, MACF1, MAP10, MCPH1, MDM1, PDCD6IP, RACGAP1, SENP6, SNCA, SPAST, TERF1]
GO:0090596	sensory organ morphogenesis	GO_BiologicalProcess	0.002	0.032	[ATP2B4, ATP8A2, CNTF, COL11A1, COL2A1, DVL3, EPHA2, FGFR3, HCN1, HDAC2, HIPK1, IRX5, JAG1, MAFB, MAN2A1, MFAP2, NOG, NR4A3, NRP1, PCDH15, RPE65, RPGR, SDK2, SEC24B, SIX4, SOX1, TDRD7, TOPORS, VEGFA, WNT1, YY1, ZEB1]
GO:0044257	cellular protein catabolic process	GO_BiologicalProcess	0.0021	0.033	[ANKIB1, APC, ARIH1, CAPN2, CBL, CHMP4C, CLN8, CLPX, CRBN, CSNK1A1, CTSA, CTSK, CTSO, CUL4A, CYLD, DLGAP5, EDEM1, FBXL2, FBXO45, GNA12, HERC3, HUWE1, KLHL8, PCID2, PDCD6IP, PML, PRKCA, PSMA5, PSMB4, PSMD10, PSMD5, PSME4, PTEN, PTTG1, RCHY1, RFWD2, RNF11, RNF122, RNF125, RNF138, RNF34, SMC5, SNF8, SOCS5, TERF1, TMF1, TOM1L1, TOPORS, TRIM67, TRIM9, UBXN2A, UFL1, USP24, USP32, USP33, USP37, USP45, U…
GO:0007050	cell cycle arrest	GO_BiologicalProcess	0.0022	0.033	[APBB2, APC, CDC14A, CDK5R1, CGRRF1, CUL4A, DST, FOXO4, GADD45A, INSM1, JMY, KIF20B, KMT2E, LAMTOR5, MACF1, MCPH1, NBN, PKD2, PML, PPM1A, PRKAA2, PRKCA, PSMA5, PSMB4, PSMD10, PSMD5, PSME4, RFWD2, SOX4, TGFB2]
GO:0045669	positive regulation of osteoblast differentiation	GO_BiologicalProcess	0.0021	0.033	[ACVR2A, ACVR2B, BMPR1A, HGF, IL6R, IL6ST, JAG1, NPNT, PRKD1, PTGER4, SMAD1]
GO:0048593	camera-type eye morphogenesis	GO_BiologicalProcess	0.0023	0.034	[ATP8A2, EPHA2, FGFR3, HCN1, HIPK1, IRX5, JAG1, MAN2A1, RPE65, RPGR, SDK2, SOX1, TDRD7, TOPORS, VEGFA, YY1, ZEB1]
GO:0010564	regulation of cell cycle process	GO_BiologicalProcess	0.0024	0.035	[APC, ATP2B4, ATRX, BORA, BRD4, CCND2, CCND3, CCSAP, CD28, CDC14A, CDC25B, CDC42, CDC7, CDK5R1, CHMP4C, CUL4A, DHDDS, DLGAP5, FBXO43, FGFR3, FOXN3, FOXO4, GSG2, INSM1, KIF20B, MAP10, MCPH1, MDM1, NBN, PCID2, PDCD6IP, PID1, PKD2, PKP4, PML, PRKAR1A, PRKCA, PSMA5, PSMB4, PSMD10, PSMD5, PSME4, PTEN, PTTG1, RACGAP1, RFWD2, SENP6, SLFN11, SMC5, SOX4, SPAST, TERF1, TGFA, TMOD3, TOM1L1, ZNF655]
GO:0042060	wound healing	GO_BiologicalProcess	0.0024	0.035	[ANO6, APOB, ARFGEF1, ATP1B1, ATP2B4, CAPZA1, CD9, CDC42, DOCK6, DOCK9, ERBB3, FGA, GLG1, GNA12, GNAI1, GRB2, GUCY1A3, H3F3A, HDAC2, HGF, HMGB1, HOPX, IFNA8, IFRD1, ITGA1, ITGA4, LAMP2, LMAN1, MACF1, MAP3K1, MMP1, MMRN1, MSTN, MYH10, MYLK, NANOS1, NOG, NOV, NR4A3, P2RY2, PABPC4, PCID2, PDPK1, PIKFYVE, PLEK, PLPP3, PRKAR1A, PRKCA, PROS1, PTGER4, PTPN11, RAB27A, RACGAP1, RAP1B, RHBDF2, SELL, SERPIN…
GO:0043009	chordate embryonic development	GO_BiologicalProcess	0.0026	0.036	[ACVR2A, ADD1, APOB, ATP6AP2, ATP7A, BCL2L11, BMPR1A, BPTF, BRD4, CAPN2, COL11A1, COL2A1, CTR9, CUL4A, DSC3, DVL3, EIF2S2, EPHA2, EXT1, FOXA1, GNA12, GRB2, HHEX, HOPX, HOXA7, HOXA9, HOXB2, IRX5, ITGA4, KIDINS220, KIF20B, MAN2A1, MEOX2, MYH10, MYO1E, NBN, NCOA3, NOG, P2RY2, PKD2, PLAC1, PTCH1, RAB23, RALA, RDH10, RIPPLY3, SEC24B, SIX4, SLC39A1, SOX4, SPIC, SPINT2, TBC1D32, TET1, TGFBR2, TMEM107, T…
GO:0051276	chromosome organization	GO_BiologicalProcess	0.0025	0.036	[ACTR6, ANP32E, ANTXR1, APC, ATRX, ATXN7, BPTF, BRD3, BRD4, CENPA, CEP55, CHAF1B, CHD3, CHD9, CHMP4C, CNGB1, COPS5, COPS7B, COPS8, CTR9, CUL4A, DEPDC1B, DHDDS, DLGAP5, DNMT1, DNMT3A, DR1, DYDC1, ELK4, EPC2, EYA3, FOXA1, GEM, GSG2, H3F3A, HDAC2, HHEX, HLTF, HMG20A, HMGB1, HOPX, HORMAD2, HUWE1, KALRN, KDM7A, KMT2A, KMT2E, MAU2, MBIP, MCPH1, MEIOB, MIER1, MIS18BP1, MMAB, MYSM1, NANOS1, NAP1L1, NAP1L…
GO:0070646	protein modification by small protein removal	GO_BiologicalProcess	0.0028	0.038	[ATXN7, COPS5, COPS7B, COPS8, CYLD, DEPDC1B, MYSM1, OTUD4, SENP5, SENP6, SUPT3H, USP24, USP32, USP33, USP37, USP45, USP48, USP6, USP8]
GO:0048812	neuron projection morphogenesis	GO_BiologicalProcess	0.0027	0.038	[ABL2, ACTR2, ADGRB3, ALCAM, APBB2, APC, ARHGEF28, ATL1, ATP7A, ATP8A2, BCL11A, BTBD3, CACNA1H, CAPRIN1, CDC42, CDH11, CDK5R1, CNTN4, COL2A1, COL9A3, CTNND2, CXCL12, DHDDS, DST, ENTHD1, EPHA2, EPYC, ERBB3, EXT1, FBXO45, FGFR3, FLRT3, GRB2, IFRD1, ITGA1, KALRN, KERA, KIDINS220, KIF20B, KIT, KITLG, LIFR, LPAR3, LRRC70, MACF1, MARK3, MMP9, MYH10, MYH11, MYH7B, NKX2-1, NOG, NR4A3, NRP1, PAK2, PLXNA4,…
GO:0048286	lung alveolus development	GO_BiologicalProcess	0.003	0.04	[ATP7A, ATXN1, FGFR3, HOPX, MAN1A2, MAN2A1, NKX2-1, PHF14, TCF21]
GO:0070647	protein modification by small protein conjugation or removal	GO_BiologicalProcess	0.0029	0.04	[ANKIB1, APC, ARIH1, ARRDC3, ASB7, ASB9, ATXN7, BCL11A, CAND1, CBL, CDC14B, CDC42, COPS5, COPS7B, COPS8, CRBN, CTR9, CUL4A, CYLD, DCAF4, DCUN1D1, DEPDC1B, FBXL2, FBXO43, FBXO45, FEM1A, FGFR3, FKBP1A, HERC3, HLTF, HUWE1, KLHL1, KLHL29, KLHL8, LRRC41, LTN1, MED6, MYSM1, NMI, NUPL2, OTUD4, PCID2, PJA1, PML, PSMA5, PSMB4, PSMD10, PSMD5, PSME4, PTEN, RAD21, RCHY1, RFWD2, RNF11, RNF122, RNF125, RNF138,…
GO:0009967	positive regulation of signal transduction	GO_BiologicalProcess	0.0031	0.041	[ABL2, ACVR2A, ACVR2B, ADAM8, ANTXR1, APC, ARFGEF1, ARPP19, ARRDC3, ATP6AP2, BCL2L11, BMPR1A, BRD4, CAT, CBL, CD28, CDC42, CHAF1B, CHUK, CNTF, COPS8, CSNK1A1, CTF1, CTH, CYLD, DEPDC1B, DSTYK, DVL3, EEF1E1, ERBB3, ESM1, FGA, FGFR3, FKBP1A, FLT4, FOXA1, FRMD7, GADD45A, GDF9, GPR37, GRB10, GRB2, HDAC2, HGF, HHEX, HMGB1, IL15, IL6R, IL6ST, INHBB, IRAK4, IRS4, ITGA1, JAG1, KALRN, KIDINS220, KIT, KITLG…
GO:0048285	organelle fission	GO_BiologicalProcess	0.0032	0.041	[ACTR2, APC, ARPP19, ATRX, BCL2L11, BORA, CCNG1, CCNG2, CCSAP, CD28, CDC14A, CDC25B, CDC42, CEP55, CHMP4C, CLIP1, CNTD1, CSNK1A1, DDHD1, DEPDC1B, DHDDS, DLGAP5, DUSP13, FBXO43, FGFR3, GEM, GSG2, HGF, HORMAD2, KIF20B, MAP10, MAU2, MEIOB, MIS18BP1, PAPD7, PCID2, PDCD6IP, PIM2, PRKAR1A, PTEN, PTTG1, RACGAP1, RAD21, SGOL2, SLC25A46, SMC2, SMC4, SMC5, SUGT1, SYCP1, SYCP2, TERF1, TEX15, TGFA, TOM1L1, T…
GO:0006366	transcription from RNA polymerase II promoter	GO_BiologicalProcess	0.0032	0.041	[ACVR2A, ACVR2B, ARF4, ATF6, ATP2B4, ATRX, ATXN1, ATXN7, BCL11A, BEND6, BMPR1A, BPTF, BRD3, BRD4, CAND1, CAPN5, CCDC62, CD28, CHD3, CHUK, CKAP2, COPS5, CPEB3, CPSF2, CREB3L2, CTR9, DNMT1, DNMT3A, DR1, DUSP28, EDNRB, EHF, ELK4, EPC2, FGFR3, FHL5, FOXA1, FOXD4, FOXD4L1, FOXD4L3, FOXD4L6, FOXO4, FOXR2, FUBP3, GALR1, GDF9, GLS, GSR, GTF2H1, GTF2H2, HDAC2, HGF, HHEX, HIVEP1, HIVEP2, HIVEP3, HLTF, HMG2…
GO:0030163	protein catabolic process	GO_BiologicalProcess	0.0033	0.042	[ADAM8, ANKIB1, APC, APOB, ARIH1, ASB9, CAPN2, CBL, CDC42, CHMP4C, CLN8, CLPX, CRBN, CSNK1A1, CTSA, CTSK, CTSO, CUL4A, CYLD, DLGAP5, EDEM1, ENPEP, FBXL2, FBXO43, FBXO45, GNA12, HERC3, HUWE1, KLHL8, LYPLA1, MMP20, PCID2, PDCD6IP, PJA1, PML, PRKCA, PSMA5, PSMB4, PSMD10, PSMD5, PSME4, PTEN, PTTG1, RCHY1, RFWD2, RNF11, RNF122, RNF125, RNF138, RNF34, SMC5, SNF8, SOCS5, TERF1, TIPARP, TMF1, TOM1L1, TOP…
GO:0006974	cellular response to DNA damage stimulus	GO_BiologicalProcess	0.0032	0.042	[ANTXR1, APC, ATRX, BCL2L11, BRD4, CASP9, CDC14B, CDC7, CHAF1B, COPS5, COPS7B, COPS8, CUL4A, CXCL12, DEPDC1B, EEF1E1, EPC2, EPHA2, ERCC6L2, ESCO2, EYA3, FBXO45, FOXN3, FOXO4, FTO, GADD45A, GRB2, GTF2H1, GTF2H2, GTF2H2C, HIPK1, HLTF, HMGB1, HUWE1, JMY, MEIOB, MMAB, MMS22L, NBN, PAPD7, PLA2R1, PML, PMS1, POLDIP2, POLK, PSMA5, PSMB4, PSMD10, PSMD5, PSME4, PTPN11, PTTG1, RAD21, RCHY1, RFWD2, RMI1, RN…
GO:0044723	single-organism carbohydrate metabolic process	GO_BiologicalProcess	0.0034	0.042	[ADPGK, AGL, ALG10, ALG10B, ALG11, ALG13, ALG2, ANGPTL3, ARCN1, ARF4, ARFGEF1, ARPP19, B4GALT5, B4GALT6, BET1, C1GALT1, CNIH3, CTSA, DHDDS, EDARADD, EDEM1, EOGT, EXT1, FPGT, GALM, GALNT11, GALNT13, GALNT3, GBE1, GOSR1, GRB10, GRIA1, IL15, IL6ST, INPP1, INPPL1, LHCGR, LMAN1, LRP2, MAN1A2, MAN2A1, MANEA, NCOA2, NPL, ONECUT1, PCNX4, PDHX, PDPK1, PGM3, PLEK, PPP1CB, PPP1R3B, PRKAA2, PRKCA, PTEN, PTGE…
GO:0060425	lung morphogenesis	GO_BiologicalProcess	0.0033	0.042	[CDC42, FOXA1, HHEX, NKX2-1, NOG, RDH10, SEC24B, TCF21, TGFBR2, YAP1]
GO:0051783	regulation of nuclear division	GO_BiologicalProcess	0.0035	0.043	[APC, ATRX, BORA, CCSAP, CD28, CDC14A, CDC42, CHMP4C, DHDDS, DLGAP5, FBXO43, FGFR3, KIF20B, PCID2, PDCD6IP, PRKAR1A, PTEN, PTTG1, SMC5, TERF1, TGFA, TOM1L1]
GO:0051781	positive regulation of cell division	GO_BiologicalProcess	0.0036	0.044	[APC, CAT, CD28, CDC25B, CDC42, DHDDS, DLGAP5, KIF20B, MAP10, PKP4, PTEN, RACGAP1, SMC5, SPAST, TERF1, TGFA, TGFB2, VEGFA]
GO:0007184	SMAD protein import into nucleus	GO_BiologicalProcess	0.0037	0.044	[BMPR1A, NOV, PML, SPTBN1, TGFB2, TOB1]
GO:0006486	protein glycosylation	GO_BiologicalProcess	0.0038	0.045	[ALG10, ALG10B, ALG11, ALG13, ALG2, ARCN1, ARF4, ARFGEF1, B4GALT5, B4GALT6, BET1, C1GALT1, CNIH3, CTSA, DHDDS, EDEM1, EOGT, EXT1, FPGT, GALNT11, GALNT13, GALNT3, GOSR1, GRIA1, IL15, LMAN1, LRP2, MAN1A2, MAN2A1, MANEA, NPL, PGM3, RAB1A, RFT1, SEC24B, SLC35A1, SPTBN1, ST3GAL5, ST8SIA3, TET1, TGFA, TIPARP, TNKS2]
GO:0070507	regulation of microtubule cytoskeleton organization	GO_BiologicalProcess	0.004	0.046	[APC, BORA, CCSAP, CDC42, CDK5R1, CHMP4C, CKAP2, CLIP1, CYLD, EML2, MCPH1, MDM1, PDCD6IP, RACGAP1, SENP6, SNCA, SPAST, TERF1]
GO:0061041	regulation of wound healing	GO_BiologicalProcess	0.004	0.046	[ANO6, ARFGEF1, FGA, HMGB1, HOPX, MYLK, NR4A3, PLEK, PLPP3, PRKCA, PROS1, PTGER4, RHBDF2, SERPINE2, STX2, TC2N, TGFBR2, TXK]
GO:0090303	positive regulation of wound healing	GO_BiologicalProcess	0.004	0.046	[ANO6, ARFGEF1, HMGB1, HOPX, MYLK, PLEK, PLPP3, PTGER4, TGFBR2]
GO:0000070	mitotic sister chromatid segregation	GO_BiologicalProcess	0.0038	0.046	[APC, ATRX, CEP55, CHMP4C, DHDDS, DLGAP5, GSG2, MAU2, PAPD7, PCID2, PDCD6IP, PTEN, PTTG1, SMC2, SMC4, SMC5, TERF1, TTN]
GO:0050982	detection of mechanical stimulus	GO_BiologicalProcess	0.004	0.046	[ATP2B4, COL11A1, DENND5A, KIT, PCDH15, PKD2, SERPINE2, TRPA1, TTN]
GO:0007346	regulation of mitotic cell cycle	GO_BiologicalProcess	0.0043	0.048	[APC, ATRX, BORA, BRD4, CCSAP, CD28, CDC14A, CDC25B, CDC42, CDC7, CHMP4C, CUL4A, CYLD, DHDDS, DLGAP5, FBXO43, FGFR3, FOXA1, FOXN3, FOXO4, KIF20B, MAP3K1, NBN, PAK2, PCID2, PDCD6IP, PID1, PIM2, PKD2, PML, PRKCA, PSMA5, PSMB4, PSMD10, PSMD5, PSME4, PTCH1, PTEN, PTPN11, PTTG1, RFWD2, SLFN11, SMC5, SOX4, TERF1, TGFA, TMOD3, TOM1L1, ZNF655]
GO:0007067	mitotic nuclear division	GO_BiologicalProcess	0.0043	0.048	[APC, ARPP19, ATRX, BORA, CCNG1, CCNG2, CCSAP, CD28, CDC14A, CDC25B, CDC42, CEP55, CHMP4C, CLIP1, CSNK1A1, DEPDC1B, DHDDS, DLGAP5, FBXO43, FGFR3, GEM, GSG2, HGF, KIF20B, MAP10, MAU2, MIS18BP1, PAPD7, PCID2, PDCD6IP, PTEN, PTTG1, RACGAP1, RAD21, SMC2, SMC4, SMC5, SUGT1, TERF1, TGFA, TOM1L1, TTN, USP37, XIAP]
GO:0042531	positive regulation of tyrosine phosphorylation of STAT protein	GO_BiologicalProcess	0.0043	0.049	[CNTF, CTF1, FGFR3, HDAC2, IL15, IL6R, IL6ST, KIT, PTGER4, VEGFA]
GO:0044424	intracellular part	GO_CellularComponent	6.2e-13	9.6e-10	[ABCA10, ABCB10, ABCB7, ABCC6, ABCE1, ABI2, ABL2, ACADSB, ACAP2, ACOT2, ACTR2, ACTR6, ACVR2A, ACVR2B, ADAM8, ADAMTS1, ADD1, ADGRF5, ADH5, ADNP2, ADPGK, AGL, AGO4, AHCYL1, AKAP11, ALG10, ALG10B, ALG11, ALG13, ALG2, ANGPTL3, ANKIB1, ANKS1B, ANP32E, ANTXR1, AOX1, AP1S1, AP4E1, AP5M1, APBB2, APC, APOB, AQP4, ARCN1, ARF4, ARFGEF1, ARFIP1, ARHGAP31, ARHGAP32, ARHGEF28, ARHGEF3, ARIH1, ARL6IP1, ARPP19, …
GO:0005737	cytoplasm	GO_CellularComponent	1.8e-10	1.3e-07	[ABCB10, ABCB7, ABCC6, ABCE1, ABI2, ABL2, ACADSB, ACAP2, ACOT2, ACTR2, ACTR6, ACVR2A, ACVR2B, ADAM8, ADAMTS1, ADD1, ADGRF5, ADH5, ADPGK, AGL, AGO4, AHCYL1, AKAP11, ALG10, ALG10B, ALG11, ALG13, ALG2, ANGPTL3, ANKIB1, ANKS1B, ANP32E, ANTXR1, AOX1, AP1S1, AP4E1, AP5M1, APBB2, APC, APOB, AQP4, ARCN1, ARF4, ARFGEF1, ARFIP1, ARHGAP31, ARHGAP32, ARHGEF28, ARHGEF3, ARIH1, ARL6IP1, ARPP19, ARRDC3, ASB9, A…
GO:0043229	intracellular organelle	GO_CellularComponent	5.4e-09	2.8e-06	[ABCA10, ABCB10, ABCB7, ABCC6, ABCE1, ABI2, ABL2, ACADSB, ACAP2, ACOT2, ACTR2, ACTR6, ADAM8, ADAMTS1, ADD1, ADGRF5, ADH5, ADNP2, ADPGK, AGL, AGO4, AHCYL1, AKAP11, ALG10, ALG10B, ALG11, ALG13, ALG2, ANGPTL3, ANKS1B, ANP32E, ANTXR1, AP1S1, AP4E1, AP5M1, APBB2, APC, APOB, ARCN1, ARF4, ARFGEF1, ARFIP1, ARHGAP32, ARL6IP1, ARPP19, ARRDC3, ASB9, ATF6, ATL1, ATP12A, ATP13A4, ATP2B4, ATP6V1A, ATP7A, ATP8A…
GO:0043231	intracellular membrane-bounded organelle	GO_CellularComponent	8.5e-09	3.3e-06	[ABCA10, ABCB10, ABCB7, ABCC6, ABCE1, ACADSB, ACAP2, ACOT2, ACTR6, ADAM8, ADD1, ADH5, ADNP2, ADPGK, AGL, AHCYL1, AKAP11, ALG10, ALG10B, ALG11, ALG13, ALG2, ANGPTL3, ANKS1B, ANP32E, ANTXR1, AP1S1, AP4E1, AP5M1, APBB2, APC, APOB, ARCN1, ARF4, ARFGEF1, ARFIP1, ARHGAP32, ARL6IP1, ARPP19, ARRDC3, ASB9, ATF6, ATL1, ATP12A, ATP13A4, ATP2B4, ATP6V1A, ATP7A, ATP8A1, ATP8A2, ATRX, ATXN1, ATXN7, B4GALT5, B4…
GO:0005634	nucleus	GO_CellularComponent	2e-06	0.00045	[ABCC6, ACTR6, ADD1, ADNP2, AGL, ALG2, ANKS1B, ANP32E, ANTXR1, APBB2, APC, ARFGEF1, ARPP19, ATF6, ATRX, ATXN1, ATXN7, BAZ2B, BCHE, BCL11A, BEND6, BEX4, BMP2K, BPTF, BRD3, BRD4, BRF2, BSN, BTBD3, C1D, C1orf174, C9orf3, C9orf69, CAND1, CAPN14, CAPN2, CASP6, CASP9, CBL, CCDC62, CCND2, CCND3, CCNG1, CDC14A, CDC14B, CDC25B, CDC7, CDK5R1, CENPA, CEPT1, CGRRF1, CHAF1B, CHD3, CHD9, CHUK, CLPX, CMTM8, CMT…
GO:0044428	nuclear part	GO_CellularComponent	1.2e-05	0.0017	[ADD1, ANKS1B, ANP32E, ANTXR1, APC, ARFGEF1, ARPP19, ATF6, ATRX, ATXN1, ATXN7, BCHE, BCL11A, BMP2K, BPTF, BRD4, BRF2, C1D, C9orf3, CAND1, CAPN14, CASP6, CCDC62, CCND2, CCND3, CDC14A, CDC14B, CDC25B, CDC7, CDK5R1, CENPA, CEPT1, CGRRF1, CHAF1B, CHD3, CHD9, CHUK, CLPX, CMTM8, CNEP1R1, CNGB1, COPS5, COPS7B, COPS8, CPSF2, CPT2, CRBN, CREB3L2, CSNK1A1, CTR9, CTSA, CUL4A, DDX52, DEPDC1B, DHX40, DLD, DMP…
GO:0005654	nucleoplasm	GO_CellularComponent	2.1e-05	0.002	[ADD1, ANKS1B, ANTXR1, APC, ARFGEF1, ARPP19, ATF6, ATRX, ATXN1, ATXN7, BCL11A, BMP2K, BPTF, BRD4, BRF2, CAND1, CAPN14, CASP6, CCDC62, CCND2, CCND3, CDC14A, CDC14B, CDC25B, CDC7, CDK5R1, CENPA, CGRRF1, CHAF1B, CHD3, CHD9, CHUK, CLPX, CMTM8, CNGB1, COPS5, COPS7B, COPS8, CPSF2, CPT2, CREB3L2, CSNK1A1, CTR9, CTSA, CUL4A, DEPDC1B, DLD, DNAJC8, DNMT1, DNMT3A, DNTT, DR1, DYDC1, DZIP1, EHF, EID2, ELK4, E…
GO:0031981	nuclear lumen	GO_CellularComponent	2.3e-05	0.0021	[ADD1, ANKS1B, ANP32E, ANTXR1, APC, ARFGEF1, ARPP19, ATF6, ATRX, ATXN1, ATXN7, BCL11A, BMP2K, BPTF, BRD4, BRF2, C1D, C9orf3, CAND1, CAPN14, CASP6, CCDC62, CCND2, CCND3, CDC14A, CDC14B, CDC25B, CDC7, CDK5R1, CENPA, CGRRF1, CHAF1B, CHD3, CHD9, CHUK, CLPX, CMTM8, CNGB1, COPS5, COPS7B, COPS8, CPSF2, CPT2, CRBN, CREB3L2, CSNK1A1, CTR9, CTSA, CUL4A, DDX52, DEPDC1B, DHX40, DLD, DMP1, DNAJC8, DNMT1, DNMT…
GO:0044446	intracellular organelle part	GO_CellularComponent	6.4e-05	0.0038	[ABCB10, ABCB7, ABCC6, ABCE1, ACADSB, ACAP2, ACOT2, ACTR2, ADAM8, ADD1, AHCYL1, AKAP11, ALG10, ALG10B, ALG11, ALG13, ALG2, ANKS1B, ANP32E, ANTXR1, AP1S1, AP4E1, AP5M1, APC, APOB, ARCN1, ARFGEF1, ARFIP1, ARHGAP32, ARL6IP1, ARPP19, ATF6, ATL1, ATP13A4, ATP6V1A, ATP7A, ATP8A1, ATP8A2, ATRX, ATXN1, ATXN7, B4GALT5, B4GALT6, BCHE, BCL11A, BCL2L11, BET1, BMP2K, BORA, BPTF, BRD4, BRF2, BSN, C1D, C1GALT1,…
GO:0070013	intracellular organelle lumen	GO_CellularComponent	0.00067	0.016	[ABCE1, ACADSB, ACOT2, ADD1, ANKS1B, ANP32E, ANTXR1, AP4E1, APC, APOB, ARFGEF1, ARPP19, ATF6, ATRX, ATXN1, ATXN7, BCHE, BCL11A, BMP2K, BPTF, BRD4, BRF2, C1D, C9orf3, CAND1, CAPN14, CASP6, CAT, CCDC62, CCND2, CCND3, CDC14A, CDC14B, CDC25B, CDC7, CDK5R1, CENPA, CGRRF1, CHAF1B, CHD3, CHD9, CHUK, CLPX, CMTM8, CNGB1, COL11A1, COL24A1, COL2A1, COL9A3, COPS5, COPS7B, COPS8, CPSF2, CPT2, CRBN, CREB3L2, C…
GO:0005794	Golgi apparatus	GO_CellularComponent	0.001	0.021	[ANGPTL3, ANTXR1, AP1S1, AP4E1, APOB, ARCN1, ARF4, ARFGEF1, ARFIP1, ARHGAP32, ATF6, ATL1, ATP7A, ATP8A1, ATP8A2, B4GALT5, B4GALT6, BET1, BSN, C1GALT1, C3orf58, CABP7, CAND1, CAPN2, CASC4, CAT, CDC42, CHST2, CLVS1, CNGB1, CNIH3, CPD, CREG2, CXCL14, DENND5A, DOPEY1, DUSP28, EHF, EI24, ENTPD4, ESCO2, EXT1, FGFR3, FNDC3A, GALNT11, GALNT13, GALNT3, GIMAP8, GLG1, GOLM1, GOSR1, GPC6, GRB2, GRIA1, GSAP, …
GO:0043005	neuron projection	GO_CellularComponent	0.0011	0.022	[ABI2, ABL2, ALCAM, ANKS1B, AP1S1, APBB2, APC, ARF4, ARHGAP32, ATL1, ATP2B4, ATP6AP2, ATP7A, BMPR1A, BPTF, BSN, C1D, CACNA1B, CAPN2, CAPRIN1, CCSAP, CDC42, CDK5R1, CHRM2, CNIH3, CNTN4, CPEB3, CTNND2, DST, EXOC4, EXOC8, FKBP1A, FLRT3, FRMD7, FRMPD4, FXR1, GRIA1, GRIK2, HCN1, IL6ST, ITGA1, KCNH8, KIF20B, KLHL1, LPAR3, LSM4, MYH10, MYH7B, NANOS1, NCAM2, NCOA2, NCOA3, NMU, NOV, NPTN, NRP1, OPRK1, PCD…
GO:0071203	WASH complex	GO_CellularComponent	0.0016	0.027	[CAPZA1, DNAJC13, FAM21A, FAM21C, SNX27]
GO:0030425	dendrite	GO_CellularComponent	0.0025	0.036	[ABI2, ABL2, ALCAM, ANKS1B, APC, ARF4, ARHGAP32, BMPR1A, BPTF, BSN, C1D, CACNA1B, CAPN2, CAPRIN1, CDK5R1, CHRM2, CNIH3, CPEB3, CTNND2, FRMPD4, FXR1, GRIA1, GRIK2, HCN1, IL6ST, KCNH8, KLHL1, MYH10, NANOS1, NCOA2, NOV, NPTN, OPRK1, PRKCA, PTCH1, PTEN, PTPRO, RAB27A, RBM3, RBM8A, SEPT11, SLC5A7, SORT1, SRGAP2, STRN, SYNPO, TRIM9, TTLL7]
GO:0072686	mitotic spindle	GO_CellularComponent	0.0029	0.039	[CCSAP, CDC14A, CDC42, EML2, GEM, KIF20B, MAP10, PKD2, PKP4, RACGAP1]
GO:0043197	dendritic spine	GO_CellularComponent	0.0032	0.041	[ABL2, ANKS1B, ARF4, ARHGAP32, CDK5R1, FRMPD4, FXR1, GRIA1, MYH10, NANOS1, NCOA2, PTEN, PTPRO, SEPT11, SRGAP2, STRN, SYNPO]
GO:0004930	G-protein coupled receptor activity	GO_MolecularFunction	1.2e-07	3.7e-05	[ADGRB3, ADGRF5, ADGRG7, ADGRL2, CALCRL, CCDC6, CHRM2, EDNRB, GALR1, GPR37, HTR1F, HTR4, LHCGR, LPAR3, MRGPRF, OPN3, OPRK1, OR2H1, OR51E1, P2RY2, PTCH1, PTGER4, S1PR1]
GO:0017160	Ral GTPase binding	GO_MolecularFunction	0.00018	0.0076	[EXOC4, EXOC8, MYO1E, RAB34, RALBP1, USP33]
GO:0008138	protein tyrosine/serine/threonine phosphatase activity	GO_MolecularFunction	0.00025	0.0092	[CDC14A, CDC14B, DUSP13, DUSP14, DUSP28, EYA3, PTEN, PTP4A1, PTPDC1, STYX, ZNF367]
GO:0004888	transmembrane signaling receptor activity	GO_MolecularFunction	0.00028	0.0099	[ACVR2A, ACVR2B, ADGRB3, ADGRF5, ADGRG7, ADGRL2, ANTXR1, BMPR1A, CALCRL, CCDC6, CD69, CHRM2, CNGB1, EDNRB, EPHA2, ERBB3, FGFR3, FLT4, GABRA6, GALR1, GPR37, GRIA1, GRIK2, HCN1, HCN4, HTR1F, HTR4, IL17RB, IL6R, IL6ST, ITGA11, KCNJ15, KIT, KLRC3, LHCGR, LIFR, LPAR3, MRGPRF, NPTN, NRP1, OPN3, OPRK1, OR2H1, OR51E1, OSMR, P2RY2, PKD2, PLXNA4, PTCH1, PTGER4, PTPRD, PTPRO, RYR2, S1PR1, SORT1, TGFBR2, TRP…
GO:0019003	GDP binding	GO_MolecularFunction	0.0006	0.015	[GEM, GNAI1, PRPS2, RAB11B, RAB14, RAB21, RAB27A, RAB8B, RAB9B, RALA, RAP1B]
GO:0016887	ATPase activity	GO_MolecularFunction	0.00077	0.018	[ABCA10, ABCB10, ABCB5, ABCB7, ABCC6, ABCE1, ATP12A, ATP13A4, ATP1B1, ATP2B4, ATP4B, ATP6V1A, ATP7A, ATP8A1, ATP8A2, ATRX, BPTF, CHD3, CLPX, CRBN, DDX43, DDX52, DHX40, DST, ERCC6L2, GTF2H1, GTF2H2, HLTF, KALRN, KATNAL1, KIF20A, KIF20B, KIF21A, KIF24, MACF1, MYH10, MYH4, MYH7B, MYO1E, NBN, PMS1, POLK, RALBP1, SEC14L2, SPAST, YME1L1, YTHDC2]
GO:0032553	ribonucleotide binding	GO_MolecularFunction	0.00084	0.019	[ABCA10, ABCB10, ABCB5, ABCB7, ABCC6, ABCE1, ABL2, ACTR2, ACVR2A, ACVR2B, ALPK1, ANTXR1, ARF4, ATL1, ATP12A, ATP13A4, ATP1B1, ATP2B4, ATP6V1A, ATP7A, ATP8A1, ATP8A2, ATRX, BMP2K, BMPR1A, C9orf69, CACNA1B, CDC42, CDC7, CHD3, CHD9, CHUK, CLPX, CNGB1, CREG2, CSNK1A1, CSNK1G3, DCK, DCLK3, DDX43, DDX52, DHDDS, DHX40, DMPK, DNAJA4, DSTYK, EPHA2, ERBB3, ERCC6L2, ETNK1, FGFR3, FLT4, FPGT, GEM, GIMAP8, GN…
GO:0003723	RNA binding	GO_MolecularFunction	0.0013	0.025	[ADD1, AGO4, AHCYL1, ALG13, ARCN1, ARHGEF28, ATXN1, C1D, CAPRIN1, CHD3, CISD2, CNGB1, COPS5, CPEB3, CPSF2, DCP1A, DDX43, DDX52, DHX40, DNMT1, DUSP14, EBNA1BP2, EEF1E1, EIF1, EIF2D, EIF2S2, EIF3A, EIF4G3, EIF5A, ERI1, FAM120A, FAM120C, FLNB, FNDC3A, FNDC3B, FTSJ3, FUBP3, FXR1, GRB2, GTF2H2, GTPBP1, HBS1L, HDAC2, HLTF, HMGB1, HMGN2, HNRNPA0, HNRNPA2B1, HNRNPF, HUWE1, KIAA0907, KRR1, LBR, LSM4, LSM6…
GO:0032555	purine ribonucleotide binding	GO_MolecularFunction	0.0015	0.027	[ABCA10, ABCB10, ABCB5, ABCB7, ABCC6, ABCE1, ABL2, ACTR2, ACVR2A, ACVR2B, ALPK1, ANTXR1, ARF4, ATL1, ATP12A, ATP13A4, ATP1B1, ATP2B4, ATP6V1A, ATP7A, ATP8A1, ATP8A2, ATRX, BMP2K, BMPR1A, C9orf69, CACNA1B, CDC42, CDC7, CHD3, CHD9, CHUK, CLPX, CNGB1, CSNK1A1, CSNK1G3, DCK, DCLK3, DDX43, DDX52, DHDDS, DHX40, DMPK, DNAJA4, DSTYK, EPHA2, ERBB3, ERCC6L2, ETNK1, FGFR3, FLT4, FPGT, GEM, GIMAP8, GNA12, GN…
GO:0004721	phosphoprotein phosphatase activity	GO_MolecularFunction	0.0019	0.031	[CDC14A, CDC14B, CDC25B, DLGAP5, DUSP13, DUSP14, DUSP28, EYA3, PHLPP2, PLPP3, PPM1A, PPP1CB, PPP1R3B, PPP3CC, PTEN, PTP4A1, PTPDC1, PTPN11, PTPN21, PTPRD, PTPRO, STYX, ZNF367]
GO:0046872	metal ion binding	GO_MolecularFunction	0.0022	0.034	[ABL2, ACAP2, ACVR2A, ACVR2B, ADAM8, ADAMTS1, ADH5, ADNP2, ADPGK, ANKIB1, ANTXR1, AOX1, ARHGEF28, ARIH1, ATL1, ATP12A, ATP13A4, ATP1B1, ATP2B4, ATP7A, ATP8A1, ATP8A2, ATRX, B4GALT5, B4GALT6, BAZ2B, BCL11A, BMPR1A, BPTF, BRF2, BSN, C1D, C1GALT1, C9orf3, CA7, CABP7, CACNA1B, CACNA1H, CAPN14, CAPN2, CAT, CBL, CD69, CDC7, CDH11, CDH5, CDK5R1, CEPT1, CGRRF1, CHD3, CISD1, CISD2, CLIP1, CLPX, CLYBL, COL…
GO:0000166	nucleotide binding	GO_MolecularFunction	0.0025	0.036	[ABCA10, ABCB10, ABCB5, ABCB7, ABCC6, ABCE1, ABL2, ACADSB, ACTR2, ACVR2A, ACVR2B, ALPK1, ANTXR1, AOX1, ARF4, ATL1, ATP12A, ATP13A4, ATP1B1, ATP2B4, ATP6V1A, ATP7A, ATP8A1, ATP8A2, ATRX, BMP2K, BMPR1A, C9orf69, CACNA1B, CAT, CDC42, CDC7, CHD3, CHD9, CHUK, CLPX, CNGB1, CPEB3, CREG2, CSNK1A1, CSNK1G3, DCK, DCLK3, DDX43, DDX52, DHDDS, DHX40, DLD, DMPK, DNAJA4, DNMT1, DSTYK, ENOX2, EPHA2, ERBB3, ERCC6…
GO:0035639	purine ribonucleoside triphosphate binding	GO_MolecularFunction	0.0028	0.038	[ABCA10, ABCB10, ABCB5, ABCB7, ABCC6, ABCE1, ABL2, ACTR2, ACVR2A, ACVR2B, ALPK1, ANTXR1, ARF4, ATL1, ATP12A, ATP13A4, ATP1B1, ATP2B4, ATP6V1A, ATP7A, ATP8A1, ATP8A2, ATRX, BMP2K, BMPR1A, C9orf69, CACNA1B, CDC42, CDC7, CHD3, CHD9, CHUK, CLPX, CSNK1A1, CSNK1G3, DCK, DCLK3, DDX43, DDX52, DHDDS, DHX40, DMPK, DNAJA4, DSTYK, EPHA2, ERBB3, ERCC6L2, ETNK1, FGFR3, FLT4, FPGT, GEM, GIMAP8, GNA12, GNAI1, GS…
GO:0004197	cysteine-type endopeptidase activity	GO_MolecularFunction	0.0028	0.039	[ATG4C, CAPN14, CAPN2, CAPN5, CASP6, CASP9, CTSK, CTSO, USP32, USP33, USP37, USP6, USP8]
GO:0032550	purine ribonucleoside binding	GO_MolecularFunction	0.0034	0.042	[ABCA10, ABCB10, ABCB5, ABCB7, ABCC6, ABCE1, ABL2, ACTR2, ACVR2A, ACVR2B, ALPK1, ANTXR1, ARF4, ATL1, ATP12A, ATP13A4, ATP1B1, ATP2B4, ATP6V1A, ATP7A, ATP8A1, ATP8A2, ATRX, BMP2K, BMPR1A, C9orf69, CACNA1B, CDC42, CDC7, CHD3, CHD9, CHUK, CLPX, CSNK1A1, CSNK1G3, DCK, DCLK3, DDX43, DDX52, DHDDS, DHX40, DMPK, DNAJA4, DSTYK, EPHA2, ERBB3, ERCC6L2, ETNK1, FGFR3, FLT4, FPGT, GEM, GIMAP8, GNA12, GNAI1, GS…
GO:0005217	intracellular ligand-gated ion channel activity	GO_MolecularFunction	0.0037	0.044	[CNGB1, HCN1, HCN4, PKD2, RYR2, TRPA1]
GO:0031624	ubiquitin conjugating enzyme binding	GO_MolecularFunction	0.0037	0.045	[ANKIB1, ARIH1, DCUN1D1, GRIK2, RNF125, RNF138, ZMYM2]
GO:0008234	cysteine-type peptidase activity	GO_MolecularFunction	0.004	0.046	[ALG13, ATG4C, CAPN14, CAPN2, CAPN5, CASP6, CASP9, CTSK, CTSO, CYLD, OTUD4, SENP5, SENP6, USP24, USP32, USP33, USP37, USP45, USP48, USP6, USP8]

## Sheet: Table S2c_TURQUOISE MODULE
Table S2c: Gene ontologies enriched for target genes of miRNAs in the TURQUOISE module
GOID	GOTerm	Ontology Source	Term PValue	Term PValue Corrected with Bonferroni step down	Associated Genes Found
GO:0007606	sensory perception of chemical stimulus	GO_BiologicalProcess	1e-37	2.6e-34	[ADCY3, C5AR1, CALHM1, CNGB1, GNAL, GRM7, OR11A1, OR2C3, OR4N4, OR51E1, PDE4A, TAS1R1, TAS2R20, TTC8, UBR3]
GO:0050906	detection of stimulus involved in sensory perception	GO_BiologicalProcess	2.6e-35	6.3e-32	[CHRNA9, CNGB1, GJA9, ITGA2, KIT, LHFPL5, NR2F6, OR11A1, OR2C3, OR4N4, OR51E1, PCDH15, PIEZO2, PPEF2, SDR16C5, SEMA5A, TAS1R1, TAS2R20]
GO:0007608	sensory perception of smell	GO_BiologicalProcess	3e-34	7.5e-31	[ADCY3, CNGB1, GNAL, GRM7, OR11A1, OR2C3, OR4N4, OR51E1, PDE4A, TTC8, UBR3]
GO:0044260	cellular macromolecule metabolic process	GO_BiologicalProcess	5.1e-15	1.2e-11	[A4GALT, AARS, AATK, ABCA1, ABCE1, ABCG1, ABL2, ACADM, ACTL6A, ACTN1, ACTN2, ACTR8, ACVR1, ACVR1B, ACVR1C, ACVR2A, ACVR2B, ADAMTSL4, ADCY1, ADCY3, ADCY6, ADD1, ADGRG3, ADORA2B, ADPRH, ADRA1A, ADRA2A, ADRA2B, ADRB2, ADRBK1, AFF3, AGBL3, AGGF1, AGO3, AGO4, AGTPBP1, AHCTF1, AHCYL1, AHRR, AICDA, AIF1, AIMP1, AJUBA, AKAP13, AKT2, AKT3, AKTIP, ALG10, ALG10B, ALG2, ALG6, ALOX12, ALS2, ALX1, AMER1, AMFR,…
GO:0007600	sensory perception	GO_BiologicalProcess	7.7e-15	1.8e-11	[ACPP, ADCY3, ADRA2A, ADRB2, ALOXE3, ARL6, ATXN7, BBS1, BBS5, BBS7, C5AR1, CACNA1D, CALHM1, CASP3, CCKBR, CDKN1B, CHRNA9, CLN8, CNGB1, CNR2, COCH, COL1A1, CRYGC, DCDC2, DFNB31, DLG2, EDNRB, EPAS1, EYA1, EYA3, FAM134B, FAM65B, FZD4, GABRA5, GJA9, GJC1, GLRB, GNAL, GRIN2A, GRM7, HMCN1, HOXA1, HOXB8, HOXD1, HPS1, IAPP, IFNG, IL10, IRX5, ITGA2, KCNA2, KIT, LHFPL5, LMNB2, LOXHD1, LRAT, LRIG1, LRIG2, L…
GO:0048731	system development	GO_BiologicalProcess	1.1e-13	2.8e-10	[AAMP, AARS, AATK, ABAT, ABCB5, ABL2, ACADM, ACAT1, ACSBG1, ACSL3, ACSL4, ACTA2, ACTL6A, ACTN1, ACTN2, ACTR2, ACVR1, ACVR1B, ACVR2A, ACVR2B, ADAMTS1, ADCY1, ADCY6, ADD1, ADGRB1, ADGRB3, ADGRG3, ADRA1A, ADRA2B, ADRB2, ADRBK1, AGGF1, AGPAT5, AGTPBP1, AICDA, AIMP1, AK2, AK4, AKT2, ALDH5A1, ALDOB, ALOX12, ALOXE3, ALS2, ALX1, AMER1, AMIGO2, AMOT, AMTN, ANGPT2, ANK1, ANKH, ANKRD11, ANPEP, AP2B1, AP2M1,…
GO:0048522	positive regulation of cellular process	GO_BiologicalProcess	3.3e-13	8.2e-10	[AAMP, ABAT, ABCA1, ABCD2, ABI3BP, ABL2, ACPP, ACSL3, ACSL4, ACTL6A, ACTN2, ACTR2, ACTR3B, ACVR1, ACVR1B, ACVR1C, ACVR2A, ACVR2B, ADAMTS1, ADAMTS3, ADAMTSL4, ADCY1, ADCY3, ADCY6, ADCYAP1R1, ADGRB1, ADGRB3, ADGRD1, ADGRF5, ADORA2B, ADRA1A, ADRA2A, ADRA2B, ADRB2, ADRBK1, AGGF1, AHRR, AICDA, AIF1, AJUBA, AKAP12, AKAP13, AKR1C2, AKT2, AKTIP, ALOX12, ALS2, ALX1, AMER1, AMIGO2, AMOT, AMOTL1, ANK1, ANKF…
GO:0060255	regulation of macromolecule metabolic process	GO_BiologicalProcess	6.2e-13	1.5e-09	[AARS, ABCG1, ABL2, ACTA2, ACTL6A, ACTN1, ACTN2, ACTR8, ACVR1, ACVR1B, ACVR1C, ACVR2A, ACVR2B, ADCY1, ADCY3, ADCY6, ADGRG3, ADORA2B, ADRA1A, ADRA2A, ADRA2B, ADRB2, AFF3, AGO3, AGO4, AHCTF1, AHCYL1, AHRR, AICDA, AIF1, AJUBA, AKAP13, AKT2, AKTIP, ALOX12, ALS2, ALX1, AMER1, ANKLE2, ANKRD30A, ANKRD49, ANKS1B, ANPEP, ANXA7, AP1AR, APAF1, APBB1, APBB3, APEX1, APLF, AREG, ARF4, ARFGEF1, ARHGEF11, ARHGEF…
GO:0031323	regulation of cellular metabolic process	GO_BiologicalProcess	9.9e-13	2.4e-09	[AARS, ABAT, ABCA1, ABCD2, ABCG1, ABL2, ACADL, ACADM, ACSL3, ACTL6A, ACTN1, ACTN2, ACTR8, ACVR1, ACVR1B, ACVR1C, ACVR2A, ACVR2B, ADCY1, ADCY3, ADCY6, ADCYAP1R1, ADGRD1, ADGRF5, ADGRG3, ADORA2B, ADRA1A, ADRA2A, ADRA2B, ADRB2, AFF3, AGO3, AGO4, AHCTF1, AHCYL1, AHRR, AICDA, AIF1, AJUBA, AKAP12, AKAP13, AKT2, AKTIP, ALOX12, ALS2, ALX1, AMER1, ANKLE2, ANKRD30A, ANKRD49, ANKS1B, AP1AR, APAF1, APBB1, AP…
GO:0051171	regulation of nitrogen compound metabolic process	GO_BiologicalProcess	1.4e-12	3.6e-09	[AARS, ABAT, ABCA1, ABCG1, ACSL3, ACTL6A, ACTN1, ACTN2, ACTR8, ACVR1, ACVR1B, ACVR2A, ACVR2B, ADCYAP1R1, ADGRD1, ADGRG3, ADORA2B, ADRA2A, ADRB2, AFF3, AGO3, AGO4, AHCTF1, AHCYL1, AHRR, AICDA, AIF1, AJUBA, AKAP12, AKT2, ALX1, ANKRD30A, ANKRD49, APAF1, APBB1, APBB3, APEX1, APLF, AREG, ARF4, ARHGEF11, ARHGEF2, ARHGEF7, ARID1A, ARID2, ARID3A, ARID4A, ARID4B, ARID5A, ARNTL, ASCC3, ASCL1, ASF1A, ASH1L,…
GO:0009893	positive regulation of metabolic process	GO_BiologicalProcess	1.6e-12	4e-09	[ABAT, ABCA1, ABCD2, ABCG1, ABHD6, ABL2, ACSL3, ACTA2, ACTN2, ACVR1, ACVR1B, ACVR1C, ACVR2A, ACVR2B, ADCY1, ADCY3, ADCY6, ADCYAP1R1, ADGRB3, ADGRD1, ADGRF5, ADORA2B, ADRA1A, ADRA2A, ADRA2B, ADRB2, ADRBK1, AGFG1, AHRR, AHSA2, AICDA, AIF1, AJUBA, AKAP12, AKAP13, AKR1B10, AKT2, AKTIP, ALDOB, ALOX12, ALS2, ALS2CL, ALX1, AMER1, ANKLE2, ANKRD49, APAF1, APBB1, APEX1, APH1B, APLF, ARAP2, AREG, ARF4, ARFG…
GO:0006357	regulation of transcription from RNA polymerase II promoter	GO_BiologicalProcess	3.4e-12	8.4e-09	[ACTL6A, ACVR1, ACVR1B, ACVR2A, ACVR2B, ADRB2, AHRR, AJUBA, AKT2, ALX1, APBB1, AREG, ARF4, ARHGEF2, ARID1A, ARID3A, ARID4A, ARID4B, ARID5A, ARNTL, ASCL1, ASH1L, ASH2L, ASXL1, ATAD2, ATAD2B, ATP1B4, ATXN1, ATXN7, BACH1, BACH2, BARX2, BATF3, BBS7, BCL11A, BCL2L12, BCL6, BEND3, BEX2, BLZF1, BMI1, BMP10, BMP2, BMP6, BRD3, BRD4, BRWD1, BRWD3, BTG2, C10orf54, CALR, CAMTA1, CAND1, CARF, CBFA2T3, CBFB, C…
GO:0010556	regulation of macromolecule biosynthetic process	GO_BiologicalProcess	4.2e-12	1e-08	[AARS, ABCG1, ACTL6A, ACTN1, ACTN2, ACTR8, ACVR1, ACVR1B, ACVR2A, ACVR2B, ADGRG3, ADRA2A, ADRB2, AFF3, AGO3, AGO4, AHCTF1, AHRR, AICDA, AJUBA, AKT2, ALX1, ANKRD30A, ANKRD49, APBB1, APBB3, APEX1, AREG, ARF4, ARFGEF1, ARHGEF11, ARHGEF2, ARHGEF7, ARID1A, ARID2, ARID3A, ARID4A, ARID4B, ARID5A, ARNTL, ASB1, ASCC3, ASCL1, ASF1A, ASH1L, ASH2L, ASPH, ASXL1, ATAD2, ATAD2B, ATF7IP2, ATP1B4, ATR, ATXN1, ATX…
GO:0080090	regulation of primary metabolic process	GO_BiologicalProcess	4.8e-12	1.1e-08	[AARS, ABAT, ABCA1, ABCD2, ABCG1, ABHD6, ABL2, ACADL, ACADM, ACSL3, ACTL6A, ACTN1, ACTN2, ACTR8, ACVR1, ACVR1B, ACVR1C, ACVR2A, ACVR2B, ADCY1, ADCY3, ADCY6, ADCYAP1R1, ADGRD1, ADGRF5, ADGRG3, ADORA2B, ADRA1A, ADRA2A, ADRA2B, ADRB2, AFF3, AGO3, AGO4, AHCTF1, AHCYL1, AHRR, AICDA, AIF1, AJUBA, AKAP12, AKAP13, AKT2, AKTIP, ALOX12, ALS2, ALX1, AMER1, ANKLE2, ANKRD30A, ANKRD49, ANKS1B, ANPEP, APAF1, AP…
GO:0010468	regulation of gene expression	GO_BiologicalProcess	5.7e-12	1.3e-08	[AARS, ABCG1, ACTA2, ACTL6A, ACTR8, ACVR1, ACVR1B, ACVR2A, ACVR2B, ADGRG3, ADRA2A, ADRB2, AFF3, AGO3, AGO4, AHCTF1, AHCYL1, AHRR, AICDA, AIF1, AJUBA, AKT2, ALOX12, ALX1, ANKRD30A, ANKRD49, ANXA7, APBB1, APBB3, APEX1, AREG, ARF4, ARHGEF11, ARHGEF2, ARID1A, ARID2, ARID3A, ARID4A, ARID4B, ARID5A, ARNTL, ASCC3, ASCL1, ASF1A, ASH1L, ASH2L, ASPH, ASXL1, ATAD2, ATAD2B, ATF7IP2, ATP1B4, ATP7A, ATXN1, ATX…
GO:0009889	regulation of biosynthetic process	GO_BiologicalProcess	6.3e-12	1.5e-08	[AARS, ABCA1, ABCG1, ABHD6, ACADL, ACADM, ACSL3, ACTL6A, ACTN1, ACTN2, ACTR8, ACVR1, ACVR1B, ACVR2A, ACVR2B, ADCYAP1R1, ADGRD1, ADGRF5, ADGRG3, ADORA2B, ADRA2A, ADRB2, AFF3, AGO3, AGO4, AHCTF1, AHRR, AICDA, AIF1, AJUBA, AKAP12, AKT2, ALX1, ANKRD30A, ANKRD49, APBB1, APBB3, APEX1, AREG, ARF4, ARFGEF1, ARHGEF11, ARHGEF2, ARHGEF7, ARID1A, ARID2, ARID3A, ARID4A, ARID4B, ARID5A, ARNTL, ARPP19, ASB1, AS…
GO:0010604	positive regulation of macromolecule metabolic process	GO_BiologicalProcess	6.5e-12	1.5e-08	[ABL2, ACTA2, ACTN2, ACVR1, ACVR1B, ACVR1C, ACVR2A, ACVR2B, ADCY1, ADCY3, ADCY6, ADORA2B, ADRA1A, ADRA2A, ADRA2B, ADRB2, AHRR, AICDA, AIF1, AJUBA, AKT2, AKTIP, ALOX12, ALS2, ALX1, AMER1, ANKLE2, ANKRD49, APAF1, APBB1, APEX1, APLF, AREG, ARF4, ARFGEF1, ARHGEF11, ARHGEF2, ARHGEF7, ARID1A, ARID3A, ARID4A, ARID4B, ARID5A, ARIH1, ARNTL, ASB9, ASCL1, ASF1A, ASH1L, ASH2L, ASPH, ASXL1, ATAD2, ATAD2B, ATG…
GO:2000112	regulation of cellular macromolecule biosynthetic process	GO_BiologicalProcess	9.9e-12	2.4e-08	[AARS, ABCG1, ACTL6A, ACTR8, ACVR1, ACVR1B, ACVR2A, ACVR2B, ADGRG3, ADRA2A, ADRB2, AFF3, AGO3, AGO4, AHCTF1, AHRR, AICDA, AJUBA, AKT2, ALX1, ANKRD30A, ANKRD49, APBB1, APBB3, APEX1, AREG, ARF4, ARFGEF1, ARHGEF11, ARHGEF2, ARHGEF7, ARID1A, ARID2, ARID3A, ARID4A, ARID4B, ARID5A, ARNTL, ASCC3, ASCL1, ASF1A, ASH1L, ASH2L, ASPH, ASXL1, ATAD2, ATAD2B, ATF7IP2, ATP1B4, ATR, ATXN1, ATXN2, ATXN7, BACE2, BA…
GO:0006464	cellular protein modification process	GO_BiologicalProcess	1.3e-11	3.3e-08	[A4GALT, AATK, ABCA1, ABL2, ACTL6A, ACTN2, ACVR1, ACVR1B, ACVR1C, ACVR2A, ACVR2B, ADAMTSL4, ADCY1, ADCY3, ADCY6, ADORA2B, ADPRH, ADRA1A, ADRA2A, ADRA2B, ADRB2, ADRBK1, AGBL3, AGTPBP1, AIF1, AJUBA, AKAP13, AKT2, AKT3, AKTIP, ALG10, ALG10B, ALG2, ALG6, ALS2, AMER1, AMFR, ANAPC13, ANK1, ANKLE2, ANKS1B, APBB1, ARCN1, AREG, ARF4, ARFGEF1, ARHGEF2, ARHGEF7, ARID4A, ARID4B, ARID5A, ARIH1, ARPP19, ARSB, …
GO:0006366	transcription from RNA polymerase II promoter	GO_BiologicalProcess	1.7e-11	4.1e-08	[ACTL6A, ACVR1, ACVR1B, ACVR2A, ACVR2B, ADRB2, AHRR, AJUBA, AKT2, ALX1, APBB1, AREG, ARF4, ARHGEF2, ARID1A, ARID3A, ARID4A, ARID4B, ARID5A, ARNTL, ASCL1, ASH1L, ASH2L, ASXL1, ATAD2, ATAD2B, ATP1B4, ATXN1, ATXN7, BACH1, BACH2, BARX2, BATF3, BBS7, BCL11A, BCL2L12, BCL6, BEND3, BEX2, BLZF1, BMI1, BMP10, BMP2, BMP6, BRD3, BRD4, BRWD1, BRWD3, BTG2, C10orf54, C5AR1, CALR, CAMTA1, CAND1, CARF, CBFA2T3, …
GO:0035556	intracellular signal transduction	GO_BiologicalProcess	2.6e-11	6.3e-08	[AATK, ABCA1, ABL2, ACTN2, ACTR2, ADCY1, ADCY3, ADCY6, ADCYAP1R1, ADGRG3, ADORA2B, ADRA1A, ADRA2A, ADRA2B, ADRB2, AEN, AGO3, AGO4, AHCTF1, AIF1, AJUBA, AKAP12, AKAP13, AKR1B10, AKR1C2, AKT2, AKT3, ALS2, ALS2CL, AMOT, AMOTL1, ANKS1B, APAF1, APEX1, APOL2, ARAP2, AREG, ARF4, ARFGEF1, ARFIP2, ARHGAP11A, ARHGAP12, ARHGAP18, ARHGAP20, ARHGAP25, ARHGAP26, ARHGAP31, ARHGAP5, ARHGEF11, ARHGEF2, ARHGEF26, …
GO:0031326	regulation of cellular biosynthetic process	GO_BiologicalProcess	2.6e-11	6.3e-08	[AARS, ABCA1, ABCG1, ACADL, ACADM, ACSL3, ACTL6A, ACTN1, ACTN2, ACTR8, ACVR1, ACVR1B, ACVR2A, ACVR2B, ADCYAP1R1, ADGRD1, ADGRF5, ADGRG3, ADORA2B, ADRA2A, ADRB2, AFF3, AGO3, AGO4, AHCTF1, AHRR, AICDA, AIF1, AJUBA, AKAP12, AKT2, ALX1, ANKRD30A, ANKRD49, APBB1, APBB3, APEX1, AREG, ARF4, ARFGEF1, ARHGEF11, ARHGEF2, ARHGEF7, ARID1A, ARID2, ARID3A, ARID4A, ARID4B, ARID5A, ARNTL, ARPP19, ASB1, ASCC3, AS…
GO:0043412	macromolecule modification	GO_BiologicalProcess	2.7e-11	6.5e-08	[A4GALT, AARS, AATK, ABCA1, ABL2, ACTL6A, ACTN2, ACVR1, ACVR1B, ACVR1C, ACVR2A, ACVR2B, ADAMTSL4, ADCY1, ADCY3, ADCY6, ADORA2B, ADPRH, ADRA1A, ADRA2A, ADRA2B, ADRB2, ADRBK1, AGBL3, AGTPBP1, AICDA, AIF1, AJUBA, AKAP13, AKT2, AKT3, AKTIP, ALG10, ALG10B, ALG2, ALG6, ALS2, AMER1, AMFR, ANAPC13, ANK1, ANKLE2, ANKS1B, APBB1, APEX1, APOBEC2, ARCN1, AREG, ARF4, ARFGEF1, ARHGEF2, ARHGEF7, ARID4A, ARID4B, …
GO:0007399	nervous system development	GO_BiologicalProcess	2.9e-11	7.1e-08	[AARS, AATK, ABAT, ABL2, ACAT1, ACSBG1, ACSL3, ACSL4, ACTL6A, ACTN2, ACTR2, ACVR1B, ADAMTS1, ADCY1, ADCY6, ADGRB1, ADGRB3, ADRA2B, AGTPBP1, AK2, AK4, AKT2, ALDH5A1, ALS2, ALX1, AMIGO2, ANK1, AP2B1, AP2M1, APAF1, APBB1, APEX1, APH1B, ARCN1, AREG, ARF4, ARFGEF1, ARHGAP26, ARHGEF11, ARHGEF2, ARHGEF28, ARHGEF7, ARID1A, ARL13B, ARL6, ARNTL, ARSB, ASAP1, ASCL1, ASPM, ATG7, ATL1, ATP2B1, ATP5F1, ATP5J, …
GO:0010646	regulation of cell communication	GO_BiologicalProcess	4.1e-11	9.9e-08	[ABAT, ABCA1, ABHD6, ABL2, ACPP, ACSL5, ACTL6A, ACTN2, ACVR1, ACVR1B, ACVR1C, ACVR2A, ACVR2B, ADAMTS3, ADGRG3, ADORA2B, ADRA1A, ADRA2A, ADRA2B, ADRB2, ADRBK1, AFAP1, AJUBA, AKAP12, AKAP13, AKR1C2, AKT2, ALS2, ALS2CL, AMER1, AMOT, ANKS1B, AP2B1, AP2M1, APAF1, APEX1, APOL2, ARAP2, AREG, ARFGEF1, ARHGAP11A, ARHGAP12, ARHGAP18, ARHGAP20, ARHGAP25, ARHGAP26, ARHGAP31, ARHGAP5, ARHGEF11, ARHGEF2, ARHGE…
GO:0019219	regulation of nucleobase-containing compound metabolic process	GO_BiologicalProcess	4.3e-11	1e-07	[ABCA1, ABCG1, ACTL6A, ACTN1, ACTN2, ACTR8, ACVR1, ACVR1B, ACVR2A, ACVR2B, ADCYAP1R1, ADGRD1, ADGRG3, ADORA2B, ADRA2A, ADRB2, AFF3, AHCTF1, AHCYL1, AHRR, AICDA, AJUBA, AKAP12, AKT2, ALX1, ANKRD30A, ANKRD49, APAF1, APBB1, APBB3, APEX1, APLF, AREG, ARF4, ARHGEF11, ARHGEF2, ARHGEF7, ARID1A, ARID2, ARID3A, ARID4A, ARID4B, ARID5A, ARNTL, ASCC3, ASCL1, ASF1A, ASH1L, ASH2L, ASPH, ASXL1, ATAD2, ATAD2B, A…
GO:0090304	nucleic acid metabolic process	GO_BiologicalProcess	5.8e-11	1.4e-07	[AARS, ABCE1, ABCG1, ACTL6A, ACTN1, ACTN2, ACTR8, ACVR1, ACVR1B, ACVR2A, ACVR2B, ADGRG3, ADRA2A, ADRB2, AEN, AFF3, AGGF1, AGO3, AGO4, AHCTF1, AHCYL1, AHRR, AICDA, AIMP1, AJUBA, AKT2, ALX1, ANKRD30A, ANKRD49, APAF1, APBB1, APBB3, APEX1, APLF, APOBEC2, AREG, ARF4, ARHGEF11, ARHGEF2, ARHGEF7, ARID1A, ARID2, ARID3A, ARID4A, ARID4B, ARID5A, ARNTL, ASCC3, ASCL1, ASF1A, ASH1L, ASH2L, ASPH, ASXL1, ATAD2,…
GO:0051252	regulation of RNA metabolic process	GO_BiologicalProcess	6.1e-11	1.4e-07	[ABCG1, ACTL6A, ACTN1, ACTN2, ACTR8, ACVR1, ACVR1B, ACVR2A, ACVR2B, ADGRG3, ADRA2A, ADRB2, AFF3, AHCTF1, AHCYL1, AHRR, AICDA, AJUBA, AKT2, ALX1, ANKRD30A, ANKRD49, APBB1, APBB3, APEX1, AREG, ARF4, ARHGEF11, ARHGEF2, ARID1A, ARID2, ARID3A, ARID4A, ARID4B, ARID5A, ARNTL, ASCC3, ASCL1, ASF1A, ASH1L, ASH2L, ASPH, ASXL1, ATAD2, ATAD2B, ATF7IP2, ATP1B4, ATXN1, ATXN7, BACH1, BACH2, BAMBI, BARX2, BATF3, …
GO:0006355	regulation of transcription, DNA-templated	GO_BiologicalProcess	9e-11	2.1e-07	[ABCG1, ACTL6A, ACTR8, ACVR1, ACVR1B, ACVR2A, ACVR2B, ADGRG3, ADRA2A, ADRB2, AFF3, AHCTF1, AHRR, AICDA, AJUBA, AKT2, ALX1, ANKRD30A, ANKRD49, APBB1, APBB3, APEX1, AREG, ARF4, ARHGEF11, ARHGEF2, ARID1A, ARID2, ARID3A, ARID4A, ARID4B, ARID5A, ARNTL, ASCC3, ASCL1, ASF1A, ASH1L, ASH2L, ASPH, ASXL1, ATAD2, ATAD2B, ATF7IP2, ATP1B4, ATXN1, ATXN7, BACH1, BACH2, BAMBI, BARX2, BATF3, BAZ1A, BAZ2B, BBS7, BB…
GO:0031325	positive regulation of cellular metabolic process	GO_BiologicalProcess	1.1e-10	2.6e-07	[ABAT, ABCA1, ABCD2, ABL2, ACSL3, ACTN2, ACVR1, ACVR1B, ACVR1C, ACVR2A, ACVR2B, ADCY1, ADCY3, ADCY6, ADCYAP1R1, ADGRD1, ADGRF5, ADORA2B, ADRA1A, ADRA2A, ADRA2B, ADRB2, AHRR, AICDA, AIF1, AJUBA, AKAP12, AKT2, AKTIP, ALOX12, ALS2, ALX1, AMER1, ANKLE2, ANKRD49, APAF1, APBB1, APEX1, APLF, AREG, ARF4, ARFGEF1, ARHGEF11, ARHGEF2, ARHGEF7, ARID1A, ARID3A, ARID4A, ARID4B, ARID5A, ARIH1, ARNTL, ARPP19, AS…
GO:1903506	regulation of nucleic acid-templated transcription	GO_BiologicalProcess	1.1e-10	2.8e-07	[ABCG1, ACTL6A, ACTN1, ACTN2, ACTR8, ACVR1, ACVR1B, ACVR2A, ACVR2B, ADGRG3, ADRA2A, ADRB2, AFF3, AHCTF1, AHRR, AICDA, AJUBA, AKT2, ALX1, ANKRD30A, ANKRD49, APBB1, APBB3, APEX1, AREG, ARF4, ARHGEF11, ARHGEF2, ARID1A, ARID2, ARID3A, ARID4A, ARID4B, ARID5A, ARNTL, ASCC3, ASCL1, ASF1A, ASH1L, ASH2L, ASPH, ASXL1, ATAD2, ATAD2B, ATF7IP2, ATP1B4, ATXN1, ATXN7, BACH1, BACH2, BAMBI, BARX2, BATF3, BAZ1A, B…
GO:2001141	regulation of RNA biosynthetic process	GO_BiologicalProcess	1.2e-10	3e-07	[ABCG1, ACTL6A, ACTN1, ACTN2, ACTR8, ACVR1, ACVR1B, ACVR2A, ACVR2B, ADGRG3, ADRA2A, ADRB2, AFF3, AHCTF1, AHRR, AICDA, AJUBA, AKT2, ALX1, ANKRD30A, ANKRD49, APBB1, APBB3, APEX1, AREG, ARF4, ARHGEF11, ARHGEF2, ARID1A, ARID2, ARID3A, ARID4A, ARID4B, ARID5A, ARNTL, ASCC3, ASCL1, ASF1A, ASH1L, ASH2L, ASPH, ASXL1, ATAD2, ATAD2B, ATF7IP2, ATP1B4, ATXN1, ATXN7, BACH1, BACH2, BAMBI, BARX2, BATF3, BAZ1A, B…
GO:0006139	nucleobase-containing compound metabolic process	GO_BiologicalProcess	1.3e-10	3.1e-07	[AARS, ABCA1, ABCE1, ABCG1, ACPP, ACTL6A, ACTN1, ACTN2, ACTR8, ACVR1, ACVR1B, ACVR2A, ACVR2B, ADCY1, ADCY3, ADCY6, ADCYAP1R1, ADGRD1, ADGRG3, ADORA2B, ADPGK, ADPRM, ADRA2A, ADRB2, AEN, AFF3, AGGF1, AGO3, AGO4, AHCTF1, AHCYL1, AHCYL2, AHRR, AICDA, AIMP1, AJUBA, AK2, AK4, AK5, AK9, AKAP12, AKT2, ALDH6A1, ALDOB, ALX1, AMPD3, ANKRD30A, ANKRD49, APAF1, APBB1, APBB3, APEX1, APLF, APOBEC2, AREG, ARF4, A…
GO:0032989	cellular component morphogenesis	GO_BiologicalProcess	2.3e-10	5.5e-07	[AATK, ABCC4, ABL2, ACTN1, ACTN2, ACTR2, ADCY1, ADD1, ADGRB1, ADGRB3, AGFG1, ALS2, ALX1, ANK1, ANXA7, AP1AR, AP2B1, AP2M1, APBB1, APEX1, APH1B, AREG, ARHGAP18, ARHGEF11, ARHGEF2, ARHGEF26, ARHGEF28, ARHGEF7, ARL13B, ARL6, ASAP1, ATG7, ATL1, ATP6V0D1, ATP7A, ATXN2, B4GAT1, BAMBI, BBOF1, BBS1, BBS5, BBS7, BCL11A, BCL2L1, BCL6, BDNF, BMP10, BMP2, BRWD1, BRWD3, BVES, C1GALT1C1, C6orf89, CACNA1A, CACN…
GO:0048513	animal organ development	GO_BiologicalProcess	2.7e-10	6.5e-07	[AARS, AATK, ABAT, ABCB5, ABL2, ACADM, ACAT1, ACSBG1, ACSL3, ACTA2, ACTL6A, ACTN1, ACTN2, ACVR1, ACVR1B, ACVR2A, ACVR2B, ADAMTS1, ADD1, ADGRG3, ADRA1A, ADRB2, ADRBK1, AGPAT5, AGTPBP1, AICDA, AK2, AK4, AKT2, ALDOB, ALOX12, ALOXE3, ALX1, AMER1, AMTN, ANGPT2, ANKH, ANKRD11, AP2B1, AP3D1, APAF1, APEX1, ARCN1, AREG, ARF4, ARG2, ARHGAP5, ARHGEF7, ARID1A, ARID4A, ARID4B, ARID5A, ARL11, ARL13B, ARL6, ARN…
GO:0030154	cell differentiation	GO_BiologicalProcess	2.8e-10	6.8e-07	[A4GALT, AAMP, AATK, ABCA1, ABCB5, ABCG1, ABL2, ACADM, ACSL4, ACTA2, ACTN1, ACTN2, ACTR2, ACVR1, ACVR1B, ACVR1C, ACVR2A, ACVR2B, ADAM12, ADAMTS1, ADCY1, ADCY6, ADCYAP1R1, ADD1, ADGRB1, ADGRB3, ADGRF5, ADGRG3, ADRA2B, ADRB2, AGFG1, AGGF1, AGPAT5, AGTPBP1, AICDA, AKR1C2, AKT2, ALDH6A1, ALOX12, ALOXE3, ALS2, ALX1, AMER1, AMOT, ANGPT2, ANK1, ANKRD49, ANPEP, ANXA7, AP1AR, AP2B1, AP2M1, AP3D1, APAF1, A…
GO:0000902	cell morphogenesis	GO_BiologicalProcess	3.8e-10	9.3e-07	[AATK, ABCC4, ABL2, ACTN1, ACTN2, ACTR2, ADCY1, ADD1, ADGRB1, ADGRB3, ALS2, ALX1, ANK1, ANXA7, AP1AR, AP2B1, AP2M1, APBB1, APEX1, APH1B, AREG, ARHGAP18, ARHGEF11, ARHGEF2, ARHGEF26, ARHGEF28, ARHGEF7, ARL13B, ARL6, ASAP1, ATG7, ATL1, ATP6V0D1, ATP7A, ATXN2, B4GAT1, BAMBI, BBOF1, BBS1, BBS5, BBS7, BCL11A, BCL6, BDNF, BMP2, BRWD1, BRWD3, BVES, C1GALT1C1, C6orf89, CACNA1A, CACNA1C, CACNA1D, CACNA1H,…
GO:0009059	macromolecule biosynthetic process	GO_BiologicalProcess	6.2e-10	1.4e-06	[A4GALT, AARS, ABCA1, ABCG1, ACADM, ACTL6A, ACTN1, ACTN2, ACTR8, ACVR1, ACVR1B, ACVR2A, ACVR2B, ADAMTS3, ADAMTSL4, ADGRG3, ADRA2A, ADRB2, AFF3, AGO3, AGO4, AHCTF1, AHRR, AICDA, AIMP1, AJUBA, AKT2, ALG10, ALG10B, ALG2, ALG6, ALX1, ANK1, ANKRD30A, ANKRD49, APBB1, APBB3, APEX1, ARCN1, AREG, ARF4, ARFGEF1, ARHGEF11, ARHGEF2, ARHGEF7, ARID1A, ARID2, ARID3A, ARID4A, ARID4B, ARID5A, ARNTL, ASB1, ASCC3, …
GO:0007186	G-protein coupled receptor signaling pathway	GO_BiologicalProcess	7e-10	1.7e-06	[ABCA1, ABHD6, ACKR4, ACPP, ACTN2, ADCY1, ADCY3, ADCY6, ADCYAP1R1, ADGRA3, ADGRB1, ADGRB3, ADGRD1, ADGRE5, ADGRF2, ADGRF5, ADGRG3, ADORA2B, ADRA1A, ADRA2A, ADRA2B, ADRB2, ADRBK1, AHCYL1, AKAP12, AKR1C2, AREG, ARHGEF11, ARPP19, BDNF, C5, C5AR1, CACNA1A, CACNA1D, CALCR, CALCRL, CALM1, CAV2, CCKBR, CCL1, CCL15, CCL23, CCL25, CCL4, CCL7, CCR2, CCR5, CCR9, CD200R1, CDK5R1, CHRM5, CNGB1, CNR2, CORT, CP…
GO:0048523	negative regulation of cellular process	GO_BiologicalProcess	8e-10	1.9e-06	[AARS, AATK, ABAT, ABCA1, ABCG1, ABHD6, ABL2, ACADL, ACTN1, ACTN2, ACVR1, ACVR1B, ACVR1C, ACVR2B, ADAMTS1, ADAMTS8, ADCY6, ADCYAP1R1, ADD1, ADGRB1, ADGRF5, ADGRG3, ADRA1A, ADRA2A, ADRA2B, ADRB2, ADRBK1, AGO3, AGO4, AHRR, AICDA, AIF1, AIMP1, AJUBA, AKT2, ALOX12, ALX1, AMER1, AMIGO2, ANGPT2, ANKLE2, ANKS1B, AP1AR, AP2B1, AP2M1, APBB1, APEX1, AREG, ARF4, ARFGEF1, ARHGEF2, ARHGEF7, ARID1A, ARID4A, AR…
GO:0016070	RNA metabolic process	GO_BiologicalProcess	9.3e-10	2.2e-06	[AARS, ABCE1, ABCG1, ACTL6A, ACTN1, ACTN2, ACTR8, ACVR1, ACVR1B, ACVR2A, ACVR2B, ADGRG3, ADRA2A, ADRB2, AFF3, AGGF1, AGO3, AGO4, AHCTF1, AHCYL1, AHRR, AICDA, AIMP1, AJUBA, AKT2, ALX1, ANKRD30A, ANKRD49, APBB1, APBB3, APEX1, APOBEC2, AREG, ARF4, ARHGEF11, ARHGEF2, ARID1A, ARID2, ARID3A, ARID4A, ARID4B, ARID5A, ARNTL, ASCC3, ASCL1, ASF1A, ASH1L, ASH2L, ASPH, ASXL1, ATAD2, ATAD2B, ATF7IP2, ATG7, ATP…
GO:0097659	nucleic acid-templated transcription	GO_BiologicalProcess	1.1e-09	2.7e-06	[ABCG1, ACTL6A, ACTN1, ACTN2, ACTR8, ACVR1, ACVR1B, ACVR2A, ACVR2B, ADGRG3, ADRA2A, ADRB2, AFF3, AHCTF1, AHRR, AICDA, AJUBA, AKT2, ALX1, ANKRD30A, ANKRD49, APBB1, APBB3, APEX1, AREG, ARF4, ARHGEF11, ARHGEF2, ARID1A, ARID2, ARID3A, ARID4A, ARID4B, ARID5A, ARNTL, ASCC3, ASCL1, ASF1A, ASH1L, ASH2L, ASPH, ASXL1, ATAD2, ATAD2B, ATF7IP2, ATP1B4, ATXN1, ATXN7, BACH1, BACH2, BAMBI, BARX2, BATF3, BAZ1A, B…
GO:0006351	transcription, DNA-templated	GO_BiologicalProcess	1.2e-09	3e-06	[ABCG1, ACTL6A, ACTR8, ACVR1, ACVR1B, ACVR2A, ACVR2B, ADGRG3, ADRA2A, ADRB2, AFF3, AHCTF1, AHRR, AICDA, AJUBA, AKT2, ALX1, ANKRD30A, ANKRD49, APBB1, APBB3, APEX1, AREG, ARF4, ARHGEF11, ARHGEF2, ARID1A, ARID2, ARID3A, ARID4A, ARID4B, ARID5A, ARNTL, ASCC3, ASCL1, ASF1A, ASH1L, ASH2L, ASPH, ASXL1, ATAD2, ATAD2B, ATF7IP2, ATP1B4, ATXN1, ATXN7, BACH1, BACH2, BAMBI, BARX2, BATF3, BAZ1A, BAZ2B, BBS7, BB…
GO:0051254	positive regulation of RNA metabolic process	GO_BiologicalProcess	1.3e-09	3.2e-06	[ACVR1, ACVR1B, ACVR2A, ADRB2, AHRR, AICDA, AKT2, ALX1, ANKRD49, APBB1, AREG, ARF4, ARHGEF11, ARHGEF2, ARID1A, ARID3A, ARID4A, ARID4B, ARID5A, ARNTL, ASCL1, ASF1A, ASH1L, ASH2L, ASPH, ASXL1, ATAD2, ATAD2B, ATP1B4, ATXN1, ATXN7, BACH1, BAMBI, BARX2, BCL10, BCL11A, BCL2L12, BEX2, BMP10, BMP2, BMP6, BRD4, BTG2, CAMKK2, CAMTA1, CAND1, CARF, CAT, CBFB, CCNA2, CCNB1, CCNC, CCNE1, CCNH, CCNK, CCPG1, CD8…
GO:0048468	cell development	GO_BiologicalProcess	1.8e-09	4.5e-06	[AATK, ABL2, ACSL4, ACTA2, ACTN1, ACTN2, ACTR2, ACVR1, ADAMTS1, ADCY1, ADCY6, ADGRB1, ADGRB3, ADRA2B, AGFG1, AKT2, ALS2, ALX1, ANGPT2, ANK1, AP1AR, AP2B1, AP2M1, APBB1, APEX1, APH1B, AREG, ARF4, ARFGEF1, ARHGEF11, ARHGEF2, ARHGEF26, ARHGEF28, ARHGEF7, ARID4A, ARID4B, ARL13B, ARNTL, ARSB, ASAP1, ASCL1, ASPM, ATG7, ATL1, ATP2A2, ATP7A, ATXN1, ATXN2, B4GAT1, BAMBI, BCL11A, BCL2L1, BCL2L11, BCL6, BDN…
GO:0048699	generation of neurons	GO_BiologicalProcess	2e-09	4.8e-06	[AATK, ABL2, ACSL4, ACTN2, ACTR2, ADAMTS1, ADCY1, ADCY6, ADGRB1, ADGRB3, ADRA2B, AGTPBP1, ALS2, ANK1, AP2B1, AP2M1, APBB1, APEX1, APH1B, AREG, ARF4, ARFGEF1, ARHGEF11, ARHGEF2, ARHGEF28, ARHGEF7, ARNTL, ARSB, ASAP1, ASCL1, ASPM, ATG7, ATL1, ATP7A, ATXN1, ATXN2, B4GAT1, BCL11A, BCL6, BDNF, BECN1, BMP2, BMP6, BNIP2, BRINP3, BTG2, C17orf96, C6orf89, CACNA1A, CACNA1C, CACNA1D, CACNA1H, CACNB1, CALM1,…
GO:0045893	positive regulation of transcription, DNA-templated	GO_BiologicalProcess	2.6e-09	6.4e-06	[ACVR1, ACVR1B, ACVR2A, ADRB2, AHRR, AICDA, AKT2, ALX1, ANKRD49, APBB1, AREG, ARF4, ARHGEF11, ARHGEF2, ARID1A, ARID3A, ARID4A, ARID4B, ARID5A, ARNTL, ASCL1, ASF1A, ASH1L, ASH2L, ASPH, ASXL1, ATAD2, ATAD2B, ATP1B4, ATXN1, ATXN7, BACH1, BAMBI, BARX2, BCL10, BCL11A, BCL2L12, BEX2, BMP10, BMP2, BMP6, BRD4, CAMKK2, CAMTA1, CAND1, CARF, CAT, CBFB, CCNA2, CCNC, CCNE1, CCNH, CCNK, CCPG1, CD80, CD86, CDH1…
GO:0030182	neuron differentiation	GO_BiologicalProcess	2.8e-09	6.7e-06	[AATK, ABL2, ACSL4, ACTN2, ACTR2, ADAMTS1, ADCY1, ADCY6, ADGRB1, ADGRB3, ADRA2B, AGTPBP1, ALS2, ANK1, AP2B1, AP2M1, APBB1, APH1B, AREG, ARF4, ARFGEF1, ARHGEF11, ARHGEF28, ARHGEF7, ARSB, ASAP1, ASCL1, ASPM, ATG7, ATL1, ATP7A, ATXN2, B4GAT1, BCL11A, BCL6, BDNF, BECN1, BMP2, BMP6, BNIP2, BRINP3, BTG2, C17orf96, C6orf89, CACNA1A, CACNA1C, CACNA1D, CACNA1H, CACNB1, CALM1, CALR, CALU, CAMSAP2, CAP2, CA…
GO:0009966	regulation of signal transduction	GO_BiologicalProcess	2.9e-09	6.9e-06	[ABAT, ABCA1, ABHD6, ABL2, ACPP, ACSL5, ACTN2, ACVR1, ACVR1B, ACVR2A, ACVR2B, ADAMTS3, ADGRG3, ADORA2B, ADRA1A, ADRA2A, ADRA2B, ADRB2, ADRBK1, AFAP1, AJUBA, AKAP12, AKAP13, AKR1C2, AKT2, ALS2, ALS2CL, AMER1, AMOT, ANKS1B, AP2B1, AP2M1, APAF1, APEX1, APOL2, ARAP2, AREG, ARFGEF1, ARHGAP11A, ARHGAP12, ARHGAP18, ARHGAP20, ARHGAP25, ARHGAP26, ARHGAP31, ARHGAP5, ARHGEF11, ARHGEF2, ARHGEF26, ARHGEF28, A…
GO:0009790	embryo development	GO_BiologicalProcess	4.4e-09	1e-05	[ACSL4, ACVR1, ACVR1B, ACVR2A, ACVR2B, ADD1, AFF3, ALS2, ALX1, AMOT, ANKRD11, APAF1, AREG, ARID1A, ARL13B, ATP7A, BBS5, BBS7, BCL10, BCL2L1, BCL2L11, BIRC6, BMP2, BNIP2, BRD4, C5, C6, CAPN2, CCDC39, CCNB1, CCNK, CCSAP, CDK1, CDK5R1, CDX1, CFC1, CFC1B, CHD8, CHRD, CHRNA9, CLASP1, CNOT2, COL12A1, COL1A1, COL5A2, CTNNB1, DAD1, DICER1, DLC1, DLL1, DSC2, DSCAML1, DUSP12, DUSP2, DUSP6, DVL3, E2F7, E2F8…
GO:0045935	positive regulation of nucleobase-containing compound metabolic process	GO_BiologicalProcess	4.7e-09	1.1e-05	[ABCA1, ACVR1, ACVR1B, ACVR2A, ADCYAP1R1, ADGRD1, ADORA2B, ADRB2, AHRR, AICDA, AKAP12, AKT2, ALX1, ANKRD49, APBB1, APEX1, APLF, AREG, ARF4, ARHGEF11, ARHGEF2, ARHGEF7, ARID1A, ARID3A, ARID4A, ARID4B, ARID5A, ARNTL, ASCL1, ASF1A, ASH1L, ASH2L, ASPH, ASXL1, ATAD2, ATAD2B, ATP1B4, ATR, ATXN1, ATXN7, BACH1, BAMBI, BARX2, BCL10, BCL11A, BCL2L12, BEX2, BMP10, BMP2, BMP6, BRCC3, BRD4, BTG2, CACNA1A, CAL…
GO:0032446	protein modification by small protein conjugation	GO_BiologicalProcess	7.2e-09	1.7e-05	[ADRB2, AKTIP, AMER1, AMFR, ANAPC13, ARIH1, ASB1, ASB15, ASB3, ASB5, ASB8, ASB9, ATG10, ATG7, BACH1, BACH2, BCL10, BCL11A, BIRC5, BIRC6, BLMH, BMI1, C6orf89, CACUL1, CAND1, CBFB, CBLB, CBLL1, CBX4, CCNB1, CCNC, CCNF, CDC23, CDC26, CDCA8, CDK1, CDK2, CHP1, CLU, CNOT4, CRY1, CTNNB1, CUL1, CUL4B, CUL5, CUL9, DCAF11, DCAF12, DCAF13, DCAF4, DCAF5, DCAF8, DCUN1D1, DCUN1D4, DCUN1D5, DISC1, DNAJB2, DTX3L…
GO:1902680	positive regulation of RNA biosynthetic process	GO_BiologicalProcess	9.5e-09	2.2e-05	[ACVR1, ACVR1B, ACVR2A, ADRB2, AHRR, AICDA, AKT2, ALX1, ANKRD49, APBB1, AREG, ARF4, ARHGEF11, ARHGEF2, ARID1A, ARID3A, ARID4A, ARID4B, ARID5A, ARNTL, ASCL1, ASF1A, ASH1L, ASH2L, ASPH, ASXL1, ATAD2, ATAD2B, ATP1B4, ATXN1, ATXN7, BACH1, BAMBI, BARX2, BCL10, BCL11A, BCL2L12, BEX2, BMP10, BMP2, BMP6, BRD4, CAMKK2, CAMTA1, CAND1, CARF, CAT, CBFB, CCNA2, CCNC, CCNE1, CCNH, CCNK, CCPG1, CD80, CD86, CDH1…
GO:0060284	regulation of cell development	GO_BiologicalProcess	9.5e-09	2.2e-05	[AATK, ABL2, ADAMTS1, ADCY6, ADGRB3, ADRA2B, ALX1, AP1AR, APBB1, APEX1, ARHGEF2, ARHGEF7, ARNTL, ARSB, ASAP1, ASCL1, ASPM, ATXN1, BAMBI, BCL11A, BCL6, BDNF, BMP10, BMP2, BMP6, BNIP2, BRINP3, CACNA1A, CALR, CAPRIN1, CCDC88A, CCR2, CDH5, CDK1, CDK5R1, CHODL, CHRNA3, CLASP1, CNOT2, CNTF, CNTN1, CNTN4, COL1A1, COL3A1, CPEB3, CPNE1, CREB1, CTNNA1, CTNNB1, CTTN, CUX1, CXCL12, CXCR4, DCC, DICER1, DISC1,…
GO:0051173	positive regulation of nitrogen compound metabolic process	GO_BiologicalProcess	1e-08	2.5e-05	[ABAT, ABCA1, ACSL3, ACVR1, ACVR1B, ACVR2A, ADCYAP1R1, ADGRD1, ADORA2B, ADRB2, AHRR, AICDA, AIF1, AKAP12, AKT2, ALX1, ANKRD49, APBB1, APEX1, APLF, AREG, ARF4, ARHGEF11, ARHGEF2, ARHGEF7, ARID1A, ARID3A, ARID4A, ARID4B, ARID5A, ARNTL, ASCL1, ASF1A, ASH1L, ASH2L, ASPH, ASXL1, ATAD2, ATAD2B, ATP1B4, ATR, ATXN1, ATXN7, BACH1, BAMBI, BARX2, BCL10, BCL11A, BCL2L12, BEX2, BMP10, BMP2, BMP6, BOLL, BRCC3,…
GO:0070647	protein modification by small protein conjugation or removal	GO_BiologicalProcess	1.1e-08	2.6e-05	[ADRB2, AKTIP, AMER1, AMFR, ANAPC13, ARIH1, ASB1, ASB15, ASB3, ASB5, ASB8, ASB9, ASXL1, ATG10, ATG7, ATXN7, BACH1, BACH2, BCL10, BCL11A, BIRC5, BIRC6, BLMH, BMI1, BRCC3, C6orf89, CACUL1, CAND1, CBFB, CBLB, CBLL1, CBX4, CCNB1, CCNC, CCNF, CDC23, CDC26, CDCA8, CDK1, CDK2, CHP1, CLU, CNOT4, CRY1, CTNNB1, CUL1, CUL4B, CUL5, CUL9, DCAF11, DCAF12, DCAF13, DCAF4, DCAF5, DCAF8, DCUN1D1, DCUN1D4, DCUN1D5,…
GO:0034645	cellular macromolecule biosynthetic process	GO_BiologicalProcess	1.2e-08	3e-05	[A4GALT, AARS, ABCA1, ABCG1, ACADM, ACTL6A, ACTR8, ACVR1, ACVR1B, ACVR2A, ACVR2B, ADAMTSL4, ADGRG3, ADRA2A, ADRB2, AFF3, AGO3, AGO4, AHCTF1, AHRR, AICDA, AIMP1, AJUBA, AKT2, ALG10, ALG10B, ALG2, ALG6, ALX1, ANK1, ANKRD30A, ANKRD49, APBB1, APBB3, APEX1, ARCN1, AREG, ARF4, ARFGEF1, ARHGEF11, ARHGEF2, ARHGEF7, ARID1A, ARID2, ARID3A, ARID4A, ARID4B, ARID5A, ARNTL, ASCC3, ASCL1, ASF1A, ASH1L, ASH2L, A…
GO:0044267	cellular protein metabolic process	GO_BiologicalProcess	1.4e-08	3.5e-05	[A4GALT, AARS, AATK, ABCA1, ABL2, ACTL6A, ACTN2, ACVR1, ACVR1B, ACVR1C, ACVR2A, ACVR2B, ADAMTSL4, ADCY1, ADCY3, ADCY6, ADD1, ADORA2B, ADPRH, ADRA1A, ADRA2A, ADRA2B, ADRB2, ADRBK1, AGBL3, AGO3, AGO4, AGTPBP1, AIF1, AIMP1, AJUBA, AKAP13, AKT2, AKT3, AKTIP, ALG10, ALG10B, ALG2, ALG6, ALOX12, ALS2, AMER1, AMFR, ANAPC13, ANK1, ANKLE2, ANKS1B, ANPEP, APAF1, APBB1, APEX1, APH1B, ARCN1, AREG, ARF4, ARFGE…
GO:0000278	mitotic cell cycle	GO_BiologicalProcess	2e-08	4.9e-05	[ACTR8, ACVR1, ACVR1B, AHCTF1, AIF1, AJUBA, ANAPC13, ANKLE2, APEX1, ARHGEF2, ARHGEF7, ARPP19, ASCL1, ASPM, AZI2, BACH1, BCL2L1, BECN1, BIRC5, BIRC6, BLZF1, BRCC3, BRD4, BRINP3, BTG3, CACUL1, CASC5, CAV2, CCNA2, CCNB1, CCNE1, CCNF, CCNG1, CCNH, CCNK, CCSAP, CD2AP, CDC14A, CDC23, CDC26, CDCA8, CDK1, CDK2, CDKN1B, CDKN2B, CENPE, CENPL, CENPQ, CEP126, CEP135, CEP41, CEP55, CEP57, CFH, CHEK1, CHMP2B, …
GO:0071310	cellular response to organic substance	GO_BiologicalProcess	2.1e-08	5e-05	[AARS, ABCA1, ABL2, ACKR4, ACTN2, ACVR1, ACVR2A, ACVR2B, ADAMTS1, ADAMTS3, ADCY1, ADCY3, ADCY6, ADCYAP1R1, ADD1, ADRA2A, ADRBK1, AGO3, AGO4, AICDA, AIF1, AKAP13, AKR1C2, AKT2, ALAD, ALDOB, ALOX12, AMFR, ANGPT2, AP2B1, AP2M1, APAF1, APEX1, APH1B, APPL1, AQP8, AREG, ARHGEF11, ARHGEF2, ARHGEF4, ARHGEF7, ARIH1, ATP1B4, ATP2B1, ATP6V0A2, ATP6V0D1, ATP6V0E2, ATP6V1B2, ATP6V1C1, ATP6V1C2, ATP6V1F, BAMBI…
GO:0032774	RNA biosynthetic process	GO_BiologicalProcess	2.1e-08	5.1e-05	[ABCG1, ACTL6A, ACTN1, ACTN2, ACTR8, ACVR1, ACVR1B, ACVR2A, ACVR2B, ADGRG3, ADRA2A, ADRB2, AFF3, AHCTF1, AHRR, AICDA, AJUBA, AKT2, ALX1, ANKRD30A, ANKRD49, APBB1, APBB3, APEX1, AREG, ARF4, ARHGEF11, ARHGEF2, ARID1A, ARID2, ARID3A, ARID4A, ARID4B, ARID5A, ARNTL, ASCC3, ASCL1, ASF1A, ASH1L, ASH2L, ASPH, ASXL1, ATAD2, ATAD2B, ATF7IP2, ATG7, ATP1B4, ATXN1, ATXN7, BACH1, BACH2, BAMBI, BARX2, BATF3, BA…
GO:0022008	neurogenesis	GO_BiologicalProcess	2.1e-08	5.1e-05	[AATK, ABL2, ACSL4, ACTN2, ACTR2, ADAMTS1, ADCY1, ADCY6, ADGRB1, ADGRB3, ADRA2B, AGTPBP1, AKT2, ALS2, ANK1, AP2B1, AP2M1, APBB1, APEX1, APH1B, AREG, ARF4, ARFGEF1, ARHGEF11, ARHGEF2, ARHGEF28, ARHGEF7, ARNTL, ARSB, ASAP1, ASCL1, ASPM, ATG7, ATL1, ATP7A, ATXN1, ATXN2, B4GAT1, BCL11A, BCL6, BDNF, BECN1, BMP2, BMP6, BNIP2, BRINP3, BTG2, C17orf96, C6orf89, CACNA1A, CACNA1C, CACNA1D, CACNA1H, CACNB1, …
GO:0010467	gene expression	GO_BiologicalProcess	2.6e-08	6.2e-05	[AARS, ABCG1, ACTA2, ACTL6A, ACTR8, ACVR1, ACVR1B, ACVR2A, ACVR2B, ADAMTS3, ADGRG3, ADRA2A, ADRB2, AFF3, AGFG1, AGGF1, AGO3, AGO4, AHCTF1, AHCYL1, AHRR, AICDA, AIF1, AIMP1, AJUBA, AKT2, ALOX12, ALX1, ANKRD30A, ANKRD49, ANPEP, ANXA7, APAF1, APBB1, APBB3, APEX1, APH1B, APOBEC2, AREG, ARF4, ARHGEF11, ARHGEF2, ARID1A, ARID2, ARID3A, ARID4A, ARID4B, ARID5A, ARNTL, ASCC3, ASCL1, ASF1A, ASH1L, ASH2L, AS…
GO:0051960	regulation of nervous system development	GO_BiologicalProcess	2.6e-08	6.2e-05	[AATK, ABL2, ADAMTS1, ADCY6, ADGRB1, ADGRB3, ADRA2B, AMIGO2, APBB1, APEX1, ARHGEF2, ARHGEF7, ARNTL, ARSB, ASAP1, ASCL1, ASPM, ATXN1, BCL11A, BCL6, BDNF, BMP2, BMP6, BNIP2, BRINP3, CACNA1A, CALR, CAPRIN1, CCDC88A, CCR2, CDK1, CDK5R1, CHODL, CHRD, CHRNA3, CLSTN2, CNTF, CNTN1, CNTN4, COL3A1, CPEB3, CPNE1, CREB1, CTNNA1, CTNNB1, CTTN, CUX1, CXCL12, CXCR4, DCC, DICER1, DISC1, DLL1, DMD, DNMT3B, DOCK7,…
GO:1902589	single-organism organelle organization	GO_BiologicalProcess	2.6e-08	6.3e-05	[A4GALT, ABCC4, ABL2, ACBD5, ACTL6A, ACTN1, ACTN2, ACTR2, ACTR3B, ACTR8, ADCY3, ADD1, ADRA2A, ADRB2, AGFG1, AICDA, AIF1, AKT2, AMOT, ANAPC13, ANKFY1, ANKLE2, AP1AR, APBB1, APEX1, ARCN1, AREG, ARFGEF1, ARFIP2, ARHGAP18, ARHGAP26, ARHGEF11, ARHGEF2, ARHGEF28, ARHGEF7, ARID1A, ARID2, ARID4A, ARID4B, ARID5A, ARL13B, ARL6, ARPP19, ASH1L, ASH2L, ASPM, ASXL1, ATG4C, ATG7, ATP2C1, ATP6V0D1, ATR, ATXN7, B…
GO:0010629	negative regulation of gene expression	GO_BiologicalProcess	2.8e-08	6.8e-05	[ACVR1B, ACVR2B, ADGRG3, AGO3, AGO4, AHRR, AICDA, AIF1, AJUBA, AKT2, ALX1, ANXA7, APEX1, ARID1A, ARID4A, ARID4B, ARID5A, ARNTL, ASCL1, ASF1A, ASXL1, ATAD2, ATAD2B, ATXN1, BACH1, BACH2, BANK1, BARX2, BATF3, BCL11A, BCL2L12, BCL6, BCL7A, BEND3, BIRC5, BMI1, BMP2, BMP6, BTAF1, BTG2, C8orf88, CALR, CAPRIN1, CAT, CBFA2T3, CBX4, CBY1, CCL4, CCNB1, CCNH, CD34, CD46, CD55, CDK2, CDK5R1, CDKN1B, CGGBP1, C…
GO:0034654	nucleobase-containing compound biosynthetic process	GO_BiologicalProcess	3.8e-08	9.1e-05	[ABCA1, ABCG1, ACTL6A, ACTN1, ACTN2, ACTR8, ACVR1, ACVR1B, ACVR2A, ACVR2B, ADCY1, ADCY3, ADCY6, ADCYAP1R1, ADGRD1, ADGRG3, ADORA2B, ADRA2A, ADRB2, AFF3, AHCTF1, AHRR, AICDA, AJUBA, AK2, AK4, AK5, AK9, AKAP12, AKT2, ALX1, AMPD3, ANKRD30A, ANKRD49, APBB1, APBB3, APEX1, AREG, ARF4, ARHGEF11, ARHGEF2, ARHGEF7, ARID1A, ARID2, ARID3A, ARID4A, ARID4B, ARID5A, ARNTL, ASCC3, ASCL1, ASF1A, ASH1L, ASH2L, AS…
GO:0010628	positive regulation of gene expression	GO_BiologicalProcess	5.1e-08	0.00012	[ACTA2, ACVR1, ACVR1B, ACVR2A, ADRB2, AHRR, AICDA, AKT2, ALOX12, ALX1, ANKRD49, APBB1, AREG, ARF4, ARHGEF11, ARHGEF2, ARID1A, ARID3A, ARID4A, ARID4B, ARID5A, ARNTL, ASCL1, ASF1A, ASH1L, ASH2L, ASPH, ASXL1, ATAD2, ATAD2B, ATP1B4, ATXN1, ATXN7, BACH1, BAMBI, BARX2, BCL10, BCL11A, BCL2L12, BEX2, BMP10, BMP2, BMP6, BOLL, BRD4, BTG2, C6, CALR, CAMKK2, CAMTA1, CAND1, CARF, CAT, CBFB, CCNA2, CCNB1, CCNC…
GO:2000026	regulation of multicellular organismal development	GO_BiologicalProcess	5.3e-08	0.00012	[AATK, ABL2, ACVR1, ACVR1B, ACVR1C, ACVR2A, ACVR2B, ADAMTS1, ADCY6, ADGRB1, ADGRB3, ADRA2B, ADRB2, AGGF1, ALOX12, ALX1, AMIGO2, AMOT, AMTN, ANGPT2, ANKH, AP3D1, APBB1, APEX1, APLF, AREG, ARHGEF2, ARHGEF7, ARID4A, ARNTL, ARSB, ASAP1, ASCL1, ASPM, ATP11C, ATXN1, BAMBI, BCL11A, BCL6, BDNF, BMP10, BMP2, BMP2K, BMP6, BNIP2, BRINP3, BTG1, C5, C5AR1, C6, CACNA1A, CALR, CAPRIN1, CBLB, CCDC88A, CCNB1, CCR…
GO:0009891	positive regulation of biosynthetic process	GO_BiologicalProcess	5.8e-08	0.00013	[ABCA1, ABCG1, ABHD6, ACSL3, ACVR1, ACVR1B, ACVR2A, ADCYAP1R1, ADGRD1, ADGRF5, ADORA2B, ADRB2, AHRR, AICDA, AIF1, AJUBA, AKAP12, AKT2, ALX1, ANKRD49, APBB1, AREG, ARF4, ARFGEF1, ARHGEF11, ARHGEF2, ARHGEF7, ARID1A, ARID3A, ARID4A, ARID4B, ARID5A, ARNTL, ARPP19, ASCL1, ASF1A, ASH1L, ASH2L, ASPH, ASXL1, ATAD2, ATAD2B, ATP1B4, ATR, ATXN1, ATXN7, BACH1, BAMBI, BARX2, BCL10, BCL11A, BCL2L12, BEX2, BMP1…
GO:0072358	cardiovascular system development	GO_BiologicalProcess	7.2e-08	0.00017	[AAMP, ACADM, ACTA2, ACTN2, ACVR1, ACVR2B, ADAMTS1, ADGRB1, ADGRB3, ADRA1A, ADRA2B, ADRB2, ADRBK1, AGGF1, AIMP1, ALOX12, AMOT, ANGPT2, ANPEP, AP2B1, ARID1A, ARL13B, ASXL1, ATG7, ATP7A, BBS5, BBS7, BMP10, BMP2, BORCS8, BTG1, BVES, C3orf58, C5, C5AR1, C6, CALCRL, CALR, CASP3, CBY1, CCDC39, CCNB1, CCR2, CD34, CDH5, CDK1, CHRNA3, CNRIP1, CNTN1, CNTRL, COL1A1, COL1A2, COL3A1, COL8A2, CPE, CTH, CTNNB1,…
GO:0010557	positive regulation of macromolecule biosynthetic process	GO_BiologicalProcess	7.6e-08	0.00018	[ACVR1, ACVR1B, ACVR2A, ADRB2, AHRR, AICDA, AKT2, ALX1, ANKRD49, APBB1, AREG, ARF4, ARFGEF1, ARHGEF11, ARHGEF2, ARHGEF7, ARID1A, ARID3A, ARID4A, ARID4B, ARID5A, ARNTL, ASCL1, ASF1A, ASH1L, ASH2L, ASPH, ASXL1, ATAD2, ATAD2B, ATP1B4, ATR, ATXN1, ATXN7, BACH1, BAMBI, BARX2, BCL10, BCL11A, BCL2L12, BEX2, BMP10, BMP2, BMP6, BOLL, BRD4, CALR, CAMKK2, CAMTA1, CAND1, CARF, CAT, CBFB, CCNA2, CCNC, CCNE1, …
GO:0050767	regulation of neurogenesis	GO_BiologicalProcess	9.6e-08	0.00022	[AATK, ABL2, ADAMTS1, ADCY6, ADGRB3, ADRA2B, APBB1, APEX1, ARHGEF2, ARHGEF7, ARNTL, ARSB, ASAP1, ASCL1, ASPM, ATXN1, BCL11A, BCL6, BDNF, BMP2, BMP6, BNIP2, BRINP3, CACNA1A, CALR, CAPRIN1, CCDC88A, CCR2, CDK1, CDK5R1, CHODL, CHRNA3, CNTF, CNTN1, CNTN4, COL3A1, CPEB3, CPNE1, CREB1, CTNNA1, CTNNB1, CTTN, CUX1, CXCL12, CXCR4, DCC, DICER1, DISC1, DLL1, DMD, DNMT3B, DOCK7, DPYSL3, ECT2, EDNRB, ELL3, EP…
GO:0010558	negative regulation of macromolecule biosynthetic process	GO_BiologicalProcess	1e-07	0.00025	[ACVR2B, ADGRG3, AGO3, AGO4, AHRR, AICDA, AJUBA, ALX1, APBB1, APEX1, AREG, ARID1A, ARID4A, ARID5A, ARNTL, ASB1, ASCL1, ASF1A, ASXL1, ATAD2, ATAD2B, ATR, ATXN1, BACE2, BACH1, BACH2, BANK1, BARX2, BATF3, BCL11A, BCL6, BCL7A, BEND3, BIRC5, BMI1, BMP2, BMP6, BTAF1, BTG2, C8orf88, CALR, CAPRIN1, CASP8AP2, CAT, CBFA2T3, CBX4, CBY1, CCL4, CDK5R1, CDKN1B, CERS1, CGGBP1, CHD8, CHP1, CIPC, CIR1, CLTC, CNOT…
GO:2000113	negative regulation of cellular macromolecule biosynthetic process	GO_BiologicalProcess	1.3e-07	0.00032	[ACVR2B, ADGRG3, AGO3, AGO4, AHRR, AICDA, AJUBA, ALX1, APEX1, ARID1A, ARID4A, ARID5A, ARNTL, ASCL1, ASF1A, ASXL1, ATAD2, ATAD2B, ATR, ATXN1, BACE2, BACH1, BACH2, BANK1, BARX2, BATF3, BCL11A, BCL6, BCL7A, BEND3, BIRC5, BMI1, BMP2, BMP6, BTAF1, BTG2, C8orf88, CALR, CAPRIN1, CAT, CBFA2T3, CBX4, CBY1, CDK5R1, CDKN1B, CERS1, CGGBP1, CHD8, CHP1, CIPC, CIR1, CNOT2, CNOT7, CPEB1, CPEB3, CPEB4, CREB1, CRE…
GO:0007166	cell surface receptor signaling pathway	GO_BiologicalProcess	1.5e-07	0.00035	[ABAT, ABCA1, ABL2, ACKR4, ACPP, ACSL5, ACTN2, ACTR2, ACVR1, ACVR1B, ACVR1C, ACVR2A, ACVR2B, ADAM11, ADAM12, ADAMTS1, ADAMTS3, ADCY1, ADCY3, ADCY6, ADCYAP1R1, ADGRA3, ADGRB1, ADGRB3, ADGRD1, ADGRE5, ADGRF2, ADGRF5, ADGRG3, ADORA2B, ADRA2A, ADRA2B, ADRB2, ADRBK1, AGO3, AGO4, AKAP13, AKT2, AMER1, AMOTL1, ANGPT2, ANGPTL1, AP2B1, AP2M1, APEX1, APH1B, APPL1, AREG, ARF4, ARHGEF11, ARHGEF2, ARHGEF28, AR…
GO:0009792	embryo development ending in birth or egg hatching	GO_BiologicalProcess	1.6e-07	0.00039	[ACSL4, ACVR1, ACVR1B, ACVR2A, ADD1, ALS2, ALX1, AMOT, ANKRD11, APAF1, AREG, ARID1A, ARL13B, ATP7A, BCL10, BCL2L1, BCL2L11, BIRC6, BMP2, BNIP2, BRD4, C5, C6, CAPN2, CCNB1, CCNK, CDX1, CHD8, CHRD, CNOT2, COL1A1, CTNNB1, DAD1, DLC1, DLL1, DSC2, DSCAML1, DVL3, E2F7, E2F8, EGLN1, EIF2S2, ELF3, ELL, EP300, EPAS1, EPB41L5, EPHA2, EXT1, EYA1, FAS, FBXW8, FGF13, FGF2, FOSL1, FOXA1, FOXF1, FZD1, FZD6, G2E…
GO:0048666	neuron development	GO_BiologicalProcess	1.7e-07	0.0004	[AATK, ABL2, ACSL4, ACTN2, ACTR2, ADAMTS1, ADCY1, ADCY6, ADGRB1, ADGRB3, ALS2, ANK1, AP2B1, AP2M1, APBB1, APH1B, AREG, ARF4, ARFGEF1, ARHGEF11, ARHGEF28, ARHGEF7, ARSB, ASAP1, ASCL1, ATG7, ATL1, ATP7A, ATXN2, B4GAT1, BCL11A, BDNF, BECN1, BTG2, C6orf89, CACNA1A, CACNA1C, CACNA1D, CACNA1H, CACNB1, CALM1, CALU, CAMSAP2, CAP2, CAPRIN1, CCDC88A, CCR2, CDH1, CDH11, CDK5R1, CHODL, CHRNA3, CHST3, CLASP1,…
GO:1901362	organic cyclic compound biosynthetic process	GO_BiologicalProcess	2.4e-07	0.00057	[ABCA1, ABCG1, ACBD3, ACTL6A, ACTN1, ACTN2, ACTR8, ACVR1, ACVR1B, ACVR2A, ACVR2B, ADCY1, ADCY3, ADCY6, ADCYAP1R1, ADGRD1, ADGRG3, ADORA2B, ADRA2A, ADRB2, AFF3, AHCTF1, AHRR, AICDA, AJUBA, AK2, AK4, AK5, AK9, AKAP12, AKR1B15, AKT2, ALAD, ALX1, AMPD3, ANKRD30A, ANKRD49, APBB1, APBB3, APEX1, AREG, ARF4, ARHGEF11, ARHGEF2, ARHGEF7, ARID1A, ARID2, ARID3A, ARID4A, ARID4B, ARID5A, ARNTL, ASCC3, ASCL1, A…
GO:0060429	epithelium development	GO_BiologicalProcess	2.5e-07	0.0006	[AARS, ABL2, ACAT1, ACTA2, ACVR1, ACVR1B, ACVR2B, AJUBA, AKR1C2, AKT2, ALOX12, ALX1, ANXA7, APAF1, AREG, ARG2, ARHGAP12, ARHGEF26, ARID1A, ARID4A, ARID4B, ARL13B, ARNTL, ASCL1, ATP2A2, ATP2C1, ATP7A, BBS5, BBS7, BCL10, BDNF, BMP2, BMP6, BTG1, C1orf68, CASP3, CAT, CCDC39, CCDC67, CD34, CDH5, CDK1, CDX1, CHRD, CHUK, CLASP1, CNN3, CPS1, CPT1A, CREB1, CTNNB1, CTSB, CUX1, CXCL12, CXCR2, CXCR4, CYP7B1,…
GO:0009890	negative regulation of biosynthetic process	GO_BiologicalProcess	2.8e-07	0.00065	[ACADL, ACVR2B, ADGRG3, ADRA2A, AGO3, AGO4, AHRR, AICDA, AJUBA, ALX1, APBB1, APEX1, AREG, ARID1A, ARID4A, ARID5A, ARNTL, ASB1, ASCL1, ASF1A, ASXL1, ATAD2, ATAD2B, ATR, ATXN1, BACE2, BACH1, BACH2, BANK1, BARX2, BATF3, BCL11A, BCL6, BCL7A, BEND3, BIRC5, BMI1, BMP2, BMP6, BTAF1, BTG2, C8orf88, CACNA1A, CALR, CAPRIN1, CASP8AP2, CAT, CBFA2T3, CBX4, CBY1, CCL4, CCR2, CD34, CDK5R1, CDKN1B, CERS1, CGGBP1…
GO:0018130	heterocycle biosynthetic process	GO_BiologicalProcess	2.8e-07	0.00067	[ABCA1, ABCG1, ACTL6A, ACTN1, ACTN2, ACTR8, ACVR1, ACVR1B, ACVR2A, ACVR2B, ADCY1, ADCY3, ADCY6, ADCYAP1R1, ADGRD1, ADGRG3, ADORA2B, ADRA2A, ADRB2, AFF3, AHCTF1, AHRR, AICDA, AJUBA, AK2, AK4, AK5, AK9, AKAP12, AKT2, ALAD, ALX1, AMPD3, ANKRD30A, ANKRD49, APBB1, APBB3, APEX1, AREG, ARF4, ARHGEF11, ARHGEF2, ARHGEF7, ARID1A, ARID2, ARID3A, ARID4A, ARID4B, ARID5A, ARNTL, ASCC3, ASCL1, ASF1A, ASH1L, ASH…
GO:0043009	chordate embryonic development	GO_BiologicalProcess	3.1e-07	0.00073	[ACVR1, ACVR1B, ACVR2A, ADD1, ALS2, ALX1, AMOT, ANKRD11, APAF1, AREG, ARID1A, ARL13B, ATP7A, BCL10, BCL2L1, BCL2L11, BIRC6, BMP2, BNIP2, BRD4, C5, C6, CAPN2, CCNB1, CCNK, CDX1, CHD8, CHRD, CNOT2, COL1A1, CTNNB1, DAD1, DLC1, DLL1, DSC2, DSCAML1, DVL3, E2F7, E2F8, EGLN1, EIF2S2, ELF3, ELL, EP300, EPAS1, EPB41L5, EPHA2, EXT1, EYA1, FAS, FBXW8, FOSL1, FOXA1, FOXF1, FZD1, FZD6, G2E3, GATA2, GATA3, GAT…
GO:0031327	negative regulation of cellular biosynthetic process	GO_BiologicalProcess	3.1e-07	0.00074	[ACADL, ACVR2B, ADGRG3, ADRA2A, AGO3, AGO4, AHRR, AICDA, AJUBA, ALX1, APEX1, ARID1A, ARID4A, ARID5A, ARNTL, ASB1, ASCL1, ASF1A, ASXL1, ATAD2, ATAD2B, ATR, ATXN1, BACE2, BACH1, BACH2, BANK1, BARX2, BATF3, BCL11A, BCL6, BCL7A, BEND3, BIRC5, BMI1, BMP2, BMP6, BTAF1, BTG2, C8orf88, CACNA1A, CALR, CAPRIN1, CASP8AP2, CAT, CBFA2T3, CBX4, CBY1, CCL4, CCR2, CD34, CDK5R1, CDKN1B, CERS1, CGGBP1, CHD8, CHP1,…
GO:1902531	regulation of intracellular signal transduction	GO_BiologicalProcess	3.1e-07	0.00074	[ABCA1, ABL2, ACTN2, ADGRG3, ADORA2B, ADRA1A, ADRA2A, ADRA2B, ADRB2, AJUBA, AKAP12, AKAP13, AKR1C2, ALS2, ALS2CL, AMOT, ANKS1B, APEX1, APOL2, ARAP2, AREG, ARFGEF1, ARHGAP11A, ARHGAP12, ARHGAP18, ARHGAP20, ARHGAP25, ARHGAP26, ARHGAP31, ARHGAP5, ARHGEF11, ARHGEF2, ARHGEF26, ARHGEF28, ARHGEF37, ARHGEF38, ARHGEF4, ARHGEF7, ARNTL, ARPP19, ASH1L, ASPH, ATP2C1, ATR, BANK1, BBC3, BCL10, BCL2L1, BCL2L11, …
GO:0008285	negative regulation of cell proliferation	GO_BiologicalProcess	3.2e-07	0.00076	[ACVR1C, ADAMTS1, ADAMTS8, ADGRB1, ADRA1A, AIF1, AIMP1, AREG, ASPH, BCL6, BDNF, BECN1, BMP2, BTG1, BTG2, BTG3, BTLA, BTN2A2, C10orf54, CASP3, CAV2, CBFA2T3, CBLB, CCL23, CCR2, CD164, CD9, CDH5, CDKN1B, CDKN2B, CGREF1, CHD5, CHD6, CLMN, CNOT7, CTLA4, CTNNA1, CTNNB1, CUL1, CUL5, CXADR, DICER1, DLC1, DLG5, DLL1, E2F3, E2F7, EEF1E1, ENPP7, ERBB4, EREG, ESR1, ETV3, FBXW7, FEZF1, FGF13, FGF2, FOSL1, FR…
GO:0007167	enzyme linked receptor protein signaling pathway	GO_BiologicalProcess	3.4e-07	0.00081	[ABL2, ACTN2, ACTR2, ACVR1, ACVR1B, ACVR1C, ACVR2A, ACVR2B, ADAM12, ADAMTS3, ADCY1, ADCY3, ADCY6, ADCYAP1R1, ADRA2A, ADRA2B, ADRB2, ADRBK1, AGO3, AGO4, AKAP13, AKT2, ANGPT2, ANGPTL1, AP2B1, AP2M1, APEX1, APH1B, APPL1, AREG, ARF4, ARHGEF11, ARHGEF2, ARHGEF28, ARHGEF4, ARHGEF7, ATP1B4, ATP6V0A2, ATP6V0D1, ATP6V0E2, ATP6V1B2, ATP6V1C1, ATP6V1C2, ATP6V1F, ATXN1, ATXN7, BAMBI, BCL2L11, BDNF, BMP10, BM…
GO:1902679	negative regulation of RNA biosynthetic process	GO_BiologicalProcess	3.6e-07	0.00086	[ACVR2B, ADGRG3, AHRR, AICDA, AJUBA, ALX1, APEX1, ARID1A, ARID4A, ARID5A, ARNTL, ASCL1, ASF1A, ASXL1, ATAD2, ATAD2B, ATXN1, BACH1, BACH2, BARX2, BATF3, BCL11A, BCL6, BCL7A, BEND3, BIRC5, BMI1, BMP2, BMP6, BTAF1, BTG2, CALR, CASP8AP2, CAT, CBFA2T3, CBX4, CBY1, CCL4, CDK5R1, CDKN1B, CGGBP1, CHD8, CHP1, CIPC, CIR1, CNOT2, CPEB3, CREB1, CREM, CRY1, CTCF, CTNNB1, CUX1, DEPDC1, DICER1, DKK3, DMRT1, DNM…
GO:0010720	positive regulation of cell development	GO_BiologicalProcess	3.7e-07	0.00087	[ABL2, ADAMTS1, ADRA2B, ALX1, APBB1, APEX1, ARHGEF7, ARSB, ASCL1, ASPM, ATXN1, BAMBI, BCL11A, BCL6, BDNF, BMP10, BMP2, BMP6, BNIP2, BRINP3, CALR, CAPRIN1, CCR2, CDH5, CNTN1, COL1A1, CPEB3, CPNE1, CTNNB1, CUX1, CXCL12, CXCR4, DICER1, DISC1, DMD, DNMT3B, DPYSL3, ECT2, ELL3, EPB41L5, EPOR, ETV5, EZH2, FBXW8, FEZ1, FEZF1, FGA, FGB, FGG, FOXA1, FYCO1, GATA2, GDF5, GDF6, GDNF, GFAP, GLI3, GLIPR2, GOLGA…
GO:0048858	cell projection morphogenesis	GO_BiologicalProcess	3.8e-07	0.00089	[AATK, ABCC4, ABL2, ACTN2, ACTR2, ADCY1, ADGRB1, ADGRB3, ALS2, ANK1, AP2B1, AP2M1, APBB1, APEX1, APH1B, ARHGEF11, ARHGEF28, ARHGEF7, ARL13B, ARL6, ASAP1, ATG7, ATL1, ATP6V0D1, ATP7A, ATXN2, B4GAT1, BBOF1, BBS1, BBS5, BBS7, BCL11A, BDNF, C6orf89, CACNA1A, CACNA1C, CACNA1D, CACNA1H, CACNB1, CALM1, CAP2, CAPRIN1, CBY1, CCDC13, CCDC39, CCR2, CDC14A, CDH11, CDK5R1, CEP126, CEP41, CHRNA3, CLASP1, CLU, …
GO:0019438	aromatic compound biosynthetic process	GO_BiologicalProcess	4e-07	0.00094	[ABCA1, ABCG1, ACTL6A, ACTN1, ACTN2, ACTR8, ACVR1, ACVR1B, ACVR2A, ACVR2B, ADCY1, ADCY3, ADCY6, ADCYAP1R1, ADGRD1, ADGRG3, ADORA2B, ADRA2A, ADRB2, AFF3, AHCTF1, AHRR, AICDA, AJUBA, AK2, AK4, AK5, AK9, AKAP12, AKT2, ALAD, ALX1, AMPD3, ANKRD30A, ANKRD49, APBB1, APBB3, APEX1, AREG, ARF4, ARHGEF11, ARHGEF2, ARHGEF7, ARID1A, ARID2, ARID3A, ARID4A, ARID4B, ARID5A, ARNTL, ASCC3, ASCL1, ASF1A, ASH1L, ASH…
GO:0048646	anatomical structure formation involved in morphogenesis	GO_BiologicalProcess	4e-07	0.00095	[AAMP, ABCC4, ACTN1, ACTN2, ACTR2, ACVR1, ACVR2B, ADAM12, ADAMTS1, ADGRB1, ADGRB3, ADRA2B, ADRB2, AGFG1, AGGF1, AGTPBP1, AIMP1, ALOX12, ALX1, AMOT, AMTN, ANGPT2, ANPEP, APAF1, APEX1, AREG, ARID1A, ARL13B, ARL6, ATP6V0D1, ATP7A, ATXN2, BBOF1, BBS1, BBS5, BBS7, BCL10, BCL2L11, BCL6, BMP10, BMP2, BTG1, C5, C5AR1, C6, CACNA1A, CACNA1H, CALCRL, CAPN2, CASC5, CASP3, CBY1, CCDC13, CCDC39, CCR2, CD34, CD…
GO:0051172	negative regulation of nitrogen compound metabolic process	GO_BiologicalProcess	4.6e-07	0.001	[ACVR2B, ADGRG3, ADRA2A, AGO3, AGO4, AHRR, AICDA, AJUBA, AKT2, ALX1, APEX1, ARID1A, ARID4A, ARID5A, ARNTL, ASCL1, ASF1A, ASXL1, ATAD2, ATAD2B, ATR, ATXN1, BACH1, BACH2, BANK1, BARX2, BATF3, BCL11A, BCL6, BCL7A, BEND3, BIRC5, BMI1, BMP2, BMP6, BTAF1, BTG2, C8orf88, CACNA1A, CALR, CAPRIN1, CASP8AP2, CAT, CBFA2T3, CBX4, CBY1, CCL4, CCR2, CD34, CDK5R1, CDKN1B, CERS1, CGGBP1, CHD8, CHP1, CIPC, CIR1, C…
GO:0031328	positive regulation of cellular biosynthetic process	GO_BiologicalProcess	4.4e-07	0.001	[ABCA1, ACSL3, ACVR1, ACVR1B, ACVR2A, ADCYAP1R1, ADGRD1, ADGRF5, ADORA2B, ADRB2, AHRR, AICDA, AIF1, AJUBA, AKAP12, AKT2, ALX1, ANKRD49, APBB1, AREG, ARF4, ARFGEF1, ARHGEF11, ARHGEF2, ARHGEF7, ARID1A, ARID3A, ARID4A, ARID4B, ARID5A, ARNTL, ARPP19, ASCL1, ASF1A, ASH1L, ASH2L, ASPH, ASXL1, ATAD2, ATAD2B, ATP1B4, ATR, ATXN1, ATXN7, BACH1, BAMBI, BARX2, BCL10, BCL11A, BCL2L12, BEX2, BMP10, BMP2, BMP6,…
GO:0051276	chromosome organization	GO_BiologicalProcess	4.5e-07	0.001	[A4GALT, ACTL6A, ACTR8, AICDA, ANP32E, APBB1, APEX1, ARID1A, ARID2, ARID4A, ARID4B, ARID5A, ASCC3, ASF1A, ASH1L, ASH2L, ASXL1, ATAD2, ATAD2B, ATG7, ATR, ATXN7, BAZ1A, BCL6, BCORL1, BECN1, BEND3, BMI1, BRCC3, BRD3, BRD4, C10orf2, C6orf89, CASC5, CBX4, CCNB1, CCT3, CDC23, CDC26, CDCA8, CDK1, CDK2, CENPE, CENPL, CENPQ, CEP55, CEP57, CHD1L, CHD2, CHD3, CHD5, CHD6, CHD8, CHEK1, CHMP2B, CHMP5, CHMP7, C…
GO:0006461	protein complex assembly	GO_BiologicalProcess	4.4e-07	0.001	[ACADL, ACADM, ACADS, ACAT1, ACOT13, ACTN2, ACTR2, ACTR3B, ADD1, ADRB2, AHCTF1, AIF1, AJUBA, ALAD, ALDH5A1, ALDOB, AMFR, AP1AR, AP2B1, APAF1, AQP11, AREG, ARFGEF1, ARFIP2, ARHGAP18, ARHGEF7, ARL6, ASF1A, ASPM, ATL1, ATP6V0A2, ATPAF1, ATPAF2, BBC3, BCL10, BCL11A, BCL2L11, BET1, BIRC5, C10orf2, C1QTNF6, CALHM1, CALR, CAND1, CAPZA1, CAPZA2, CASC5, CAT, CAV2, CBR4, CCDC39, CCNB1, CCSAP, CCT3, CD2AP, …
GO:0006325	chromatin organization	GO_BiologicalProcess	4.7e-07	0.0011	[ACTL6A, ACTR8, AICDA, ANP32E, APBB1, ARID1A, ARID2, ARID4A, ARID4B, ARID5A, ASF1A, ASH1L, ASH2L, ASXL1, ATAD2, ATAD2B, ATG7, ATXN7, BAZ1A, BCL6, BCORL1, BEND3, BMI1, BRCC3, BRD3, BRD4, C6orf89, CASC5, CBX4, CCNB1, CDK1, CDK2, CENPL, CENPQ, CHD1L, CHD2, CHD3, CHD5, CHD6, CHD8, CHEK1, CPA4, CTCF, CTCFL, CTNNB1, CUL4B, DEK, DNMT1, DNMT3B, DR1, DTX3L, ELK4, ELP3, ELP5, EP300, EPC2, ESR1, EYA1, EYA3,…
GO:0032990	cell part morphogenesis	GO_BiologicalProcess	4.7e-07	0.0011	[AATK, ABCC4, ABL2, ACTN2, ACTR2, ADCY1, ADGRB1, ADGRB3, ALS2, ANK1, AP2B1, AP2M1, APBB1, APEX1, APH1B, ARHGEF11, ARHGEF28, ARHGEF7, ARL13B, ARL6, ASAP1, ATG7, ATL1, ATP6V0D1, ATP7A, ATXN2, B4GAT1, BBOF1, BBS1, BBS5, BBS7, BCL11A, BCL2L1, BDNF, C6orf89, CACNA1A, CACNA1C, CACNA1D, CACNA1H, CACNB1, CALM1, CAP2, CAPRIN1, CBY1, CCDC13, CCDC39, CCR2, CDC14A, CDH11, CDK5R1, CEP126, CEP41, CHRNA3, CLASP…
GO:0000904	cell morphogenesis involved in differentiation	GO_BiologicalProcess	4.7e-07	0.0011	[AATK, ABL2, ACTN1, ACTN2, ACTR2, ADCY1, ADGRB1, ADGRB3, ALS2, ALX1, ANK1, AP1AR, AP2B1, AP2M1, APBB1, APH1B, AREG, ARHGEF11, ARHGEF26, ARHGEF28, ARHGEF7, ARL13B, ATG7, ATL1, ATP7A, B4GAT1, BAMBI, BCL11A, BDNF, BMP2, BVES, C1GALT1C1, C6orf89, CACNA1A, CACNA1C, CACNA1D, CACNA1H, CACNB1, CALM1, CALR, CAP2, CAPRIN1, CASP3, CCR2, CDH11, CDK5R1, CHRNA3, CLASP1, CNTN1, CNTN4, COL1A1, COL3A1, COL5A2, CO…
GO:0022603	regulation of anatomical structure morphogenesis	GO_BiologicalProcess	5.5e-07	0.0012	[AATK, ABL2, ADGRB1, ADGRB3, ADRB2, AGGF1, ALOX12, ALX1, AMOT, AMTN, ANGPT2, ANXA7, AP1AR, APEX1, AREG, ARHGAP18, ARHGEF7, BAMBI, BCL11A, BCL6, BDNF, BMP10, BMP2, BNIP3, BRWD1, BRWD3, BTG1, BVES, C5, C5AR1, C6, CACNA1A, CALR, CAPRIN1, CCL7, CCR2, CD34, CDC42EP1, CDC42EP3, CDC42SE2, CDK5R1, CDX1, CHAD, CHRNA3, CLASP1, CNTF, CNTN1, COCH, COL1A1, COL5A2, CTNNB1, CTTN, CUX1, CXCL12, CXCL9, CXCR2, DCC…
GO:0045944	positive regulation of transcription from RNA polymerase II promoter	GO_BiologicalProcess	5.8e-07	0.0013	[ACVR1, ACVR1B, ACVR2A, ADRB2, AHRR, AKT2, ALX1, APBB1, AREG, ARF4, ARHGEF2, ARID3A, ARID4A, ARID4B, ARID5A, ARNTL, ASCL1, ASH1L, ASH2L, ASXL1, ATAD2, ATAD2B, ATP1B4, ATXN1, ATXN7, BACH1, BARX2, BCL11A, BCL2L12, BEX2, BMP2, BMP6, BRD4, CAMTA1, CAND1, CARF, CBFB, CCNC, CCNH, CCNK, CCPG1, CDKN2AIP, CDKN2B, CDX1, CHD6, CHD8, CHUK, CKAP2, CNBP, CNOT7, CREB1, CREM, CRLF3, CSRNP1, CSRNP2, CSRNP3, CTCF,…
GO:0080134	regulation of response to stress	GO_BiologicalProcess	6.2e-07	0.0014	[ABAT, ACTL6A, ADORA2B, ADRA2A, ADRB2, AJUBA, ALOX12, ANKS1B, AP2B1, AP2M1, APBB1, APEX1, ARFGEF1, ARHGEF2, ARHGEF7, ARNTL, ASH1L, ATG7, ATR, BBC3, BCL10, BCL2L1, BCL2L11, BCL2L12, BCL6, BECN1, BMP10, BMP2, BNIP3, BRCC3, BRD4, C2, C5, C6, CA7, CALCOCO2, CALCRL, CALM1, CCDC36, CCL1, CCL15, CCL23, CCL4, CCL7, CCR2, CD34, CD46, CD47, CD55, CD6, CD86, CD93, CDK19, CFH, CHEK1, CHST3, CHUK, CLASP1, CLE…
GO:0042127	regulation of cell proliferation	GO_BiologicalProcess	6.2e-07	0.0014	[ABL2, ACVR1C, ADAMTS1, ADAMTS8, ADGRB1, ADRA1A, ADRA2A, ADRB2, AGGF1, AGO3, AIF1, AIMP1, AKR1C2, ALOX12, AREG, ARHGAP5, ARHGEF2, ASCL1, ASH2L, ASPH, ASPM, ATXN1, BAMBI, BCL2L1, BCL6, BDNF, BECN1, BIRC5, BIRC6, BMI1, BMP10, BMP2, BMP6, BTG1, BTG2, BTG3, BTLA, BTN2A2, C10orf54, C5AR1, CACUL1, CALCRL, CALR, CASP3, CAV2, CBFA2T3, CBLB, CCDC88A, CCKBR, CCL23, CCNA2, CCNB1, CCPG1, CCR2, CD164, CD46, C…
GO:0007507	heart development	GO_BiologicalProcess	6.6e-07	0.0015	[ACADM, ACTN2, ACVR1, ACVR2B, ADAMTS1, ADRA1A, ADRBK1, AP2B1, ARID1A, ARL13B, ASXL1, ATG7, BBS5, BBS7, BMP10, BMP2, BORCS8, BVES, C3orf58, CALCRL, CALR, CASP3, CBY1, CCDC39, CCNB1, CDK1, CHRNA3, CNRIP1, CNTRL, COL3A1, CPE, CTNNB1, CXADR, DICER1, DLC1, DLL1, DUSP6, DVL3, EGLN1, EP300, EPOR, ERBB4, EYA1, FAT4, FBN1, FGF13, FGF19, FGF2, FHOD3, FLRT3, FOXF1, FOXN4, FZD1, GALNT11, GATA2, GATA3, GATA4,…
GO:1903507	negative regulation of nucleic acid-templated transcription	GO_BiologicalProcess	6.6e-07	0.0015	[ACVR2B, ADGRG3, AHRR, AICDA, AJUBA, ALX1, APEX1, ARID1A, ARID4A, ARID5A, ARNTL, ASCL1, ASF1A, ASXL1, ATAD2, ATAD2B, ATXN1, BACH1, BACH2, BARX2, BATF3, BCL11A, BCL6, BCL7A, BEND3, BIRC5, BMI1, BMP2, BMP6, BTAF1, BTG2, CALR, CASP8AP2, CAT, CBFA2T3, CBX4, CBY1, CDK5R1, CDKN1B, CGGBP1, CHD8, CHP1, CIPC, CIR1, CNOT2, CPEB3, CREB1, CREM, CRY1, CTCF, CTNNB1, CUX1, DEPDC1, DICER1, DKK3, DMRT1, DNMT1, DN…
GO:0045595	regulation of cell differentiation	GO_BiologicalProcess	6.8e-07	0.0015	[AATK, ABCA1, ABCG1, ABL2, ACVR1, ACVR1B, ACVR2A, ACVR2B, ADAMTS1, ADCY6, ADGRB3, ADRA2B, ALOX12, ALX1, AP1AR, AP3D1, APBB1, APEX1, AREG, ARHGEF2, ARHGEF7, ARID4A, ARNTL, ARSB, ASAP1, ASCL1, ASPM, ASXL1, ATP11C, ATXN1, BAMBI, BCL11A, BCL6, BDNF, BMP10, BMP2, BMP6, BNIP2, BRINP3, BTG1, C10orf54, CACNA1A, CALR, CAPRIN1, CCDC88A, CCNE1, CCR2, CD34, CD46, CD80, CD86, CDH5, CDK1, CDK5R1, CHODL, CHRD, …
GO:0080135	regulation of cellular response to stress	GO_BiologicalProcess	7e-07	0.0016	[ACTL6A, ADRB2, AJUBA, ANKS1B, APBB1, APEX1, ARHGEF2, ARNTL, ATG7, ATR, BBC3, BCL2L1, BCL2L11, BCL2L12, BCL6, BECN1, BMP2, BNIP3, BRCC3, BRD4, CALCOCO2, CD34, CHEK1, CLU, CRY1, CSNK2A2, CTTN, CXCL12, DCN, DEK, DHFR, DLC1, DNAJC7, DTNBP1, DUSP19, DUSP3, DVL3, EEF1E1, EIF2AK3, ELL3, EP300, EPOR, ERCC6, ERCC8, EYA1, EYA3, FAM175A, FBLN5, FBXO18, FBXW7, FEZ1, FGF19, FIGN, FZD10, FZD4, FZD8, GADD45A, …
GO:0022402	cell cycle process	GO_BiologicalProcess	6.9e-07	0.0016	[ACTR2, ACTR8, ACVR1, ACVR1B, ADCY3, AHCTF1, AIF1, AJUBA, AKT2, ANAPC13, ANKLE2, APBB1, APEX1, ARHGEF11, ARHGEF2, ARPP19, ASPM, ATR, BACH1, BCL2L1, BCL2L11, BECN1, BIRC5, BIRC6, BOLL, BRCC3, BRD4, BRINP3, C10orf99, CAB39L, CACUL1, CALM1, CALR, CASC5, CAV2, CCDC67, CCDC87, CCNA2, CCNB1, CCNC, CCND2, CCNE1, CCNF, CCNG1, CCNH, CCNK, CCSAP, CD2AP, CDC14A, CDC23, CDC26, CDCA8, CDK1, CDK2, CDK5R1, CDKN…
GO:0045892	negative regulation of transcription, DNA-templated	GO_BiologicalProcess	7.5e-07	0.0017	[ACVR2B, ADGRG3, AHRR, AICDA, AJUBA, ALX1, ARID1A, ARID4A, ARID5A, ARNTL, ASCL1, ASF1A, ASXL1, ATAD2, ATAD2B, ATXN1, BACH1, BACH2, BARX2, BATF3, BCL11A, BCL6, BCL7A, BEND3, BIRC5, BMI1, BMP2, BMP6, BTAF1, BTG2, CALR, CAT, CBFA2T3, CBX4, CBY1, CDK5R1, CDKN1B, CGGBP1, CHD8, CHP1, CIPC, CIR1, CNOT2, CPEB3, CREB1, CREM, CRY1, CTCF, CTNNB1, CUX1, DEPDC1, DICER1, DKK3, DMRT1, DNMT1, DNMT3B, DNPEP, DR1,…
GO:0051962	positive regulation of nervous system development	GO_BiologicalProcess	7.7e-07	0.0017	[ABL2, ADAMTS1, ADGRB1, ADGRB3, ADRA2B, AMIGO2, APBB1, APEX1, ARHGEF7, ARSB, ASCL1, ASPM, ATXN1, BCL11A, BCL6, BDNF, BMP2, BMP6, BNIP2, BRINP3, CAPRIN1, CCR2, CLSTN2, CNTN1, CPEB3, CPNE1, CTNNB1, CUX1, CXCL12, CXCR4, DICER1, DISC1, DMD, DNMT3B, DPYSL3, ECT2, ELL3, EPHB2, EPHB3, EPOR, ETV5, EZH2, FBXW8, FEZ1, FEZF1, FGF13, FGF2, FLRT1, FLRT3, FOXA1, FYCO1, GATA2, GDF5, GDF6, GDNF, GFAP, GLI3, GOLG…
GO:0031175	neuron projection development	GO_BiologicalProcess	7.4e-07	0.0017	[AATK, ABL2, ACSL4, ACTN2, ACTR2, ADAMTS1, ADCY1, ADCY6, ADGRB1, ADGRB3, ALS2, ANK1, AP2B1, AP2M1, APBB1, APH1B, AREG, ARF4, ARFGEF1, ARHGEF11, ARHGEF28, ARHGEF7, ARSB, ASAP1, ATG7, ATL1, ATP7A, ATXN2, B4GAT1, BCL11A, BDNF, BTG2, C6orf89, CACNA1A, CACNA1C, CACNA1D, CACNA1H, CACNB1, CALM1, CALU, CAMSAP2, CAP2, CAPRIN1, CCDC88A, CCR2, CDH1, CDH11, CDK5R1, CHODL, CHRNA3, CHST3, CLASP1, CLMN, CLU, CN…
GO:0035295	tube development	GO_BiologicalProcess	8.3e-07	0.0019	[ACAT1, ACVR1, ACVR2B, ALX1, APAF1, AREG, ARG2, ARID1A, ARL13B, ASCL1, ASXL1, ATP7A, ATXN1, BBS5, BBS7, BCL10, BCL2L11, BDNF, BMP2, CAT, CCDC39, CCKBR, CCNB1, CHD8, CHRD, COL3A1, CPS1, CREB1, CRISPLD2, CTNNB1, CUX1, CXCL12, CXCR2, DHX15, DICER1, DLC1, DLG5, DLL1, DVL3, EDA, EDNRB, EP300, EPAS1, EPB41L5, EPCAM, EPHA2, EPHA7, EPHB3, ESR1, ETV5, EYA1, FAT4, FBXW7, FGF1, FGF13, FGF2, FGF7, FLNB, FOXA…
GO:0051128	regulation of cellular component organization	GO_BiologicalProcess	1e-06	0.0024	[AATK, ABL2, ACSL3, ACSL4, ACTL6A, ACTN2, ACTR2, ACTR3B, ACVR1B, ADAMTS1, ADCY6, ADD1, ADGRB1, ADGRB3, ADRB2, AFAP1, AICDA, AJUBA, AKT2, ALOX12, ALX1, AMIGO2, AMOT, ANK1, ANKFY1, ANXA7, AP1AR, AP2M1, APAF1, APBB1, APEX1, APPL1, AREG, ARFGEF1, ARFIP2, ARHGAP18, ARHGEF11, ARHGEF2, ARHGEF7, ARID5A, ARSB, ASAP1, ASF1A, ASPH, ATAD2, ATAD2B, ATG7, ATR, ATXN2, ATXN2L, BAMBI, BBC3, BCL11A, BCL2L1, BCL2L1…
GO:0070848	response to growth factor	GO_BiologicalProcess	1.2e-06	0.0029	[ACTN2, ACVR1, ACVR2A, ACVR2B, ADAMTS3, ADCY1, ADCY3, ADCY6, ADCYAP1R1, ADRBK1, AGO3, AGO4, AKAP13, ANGPT2, AP2B1, AP2M1, APAF1, APEX1, APH1B, ARHGEF11, ARHGEF2, ARHGEF4, ARHGEF7, ASCL1, ATP1B4, BAMBI, BCL2L11, BECN1, BMP10, BMP2, BMP6, C10orf54, C6orf89, CALM1, CASP3, CAT, CAV2, CCNA2, CCNC, CCNK, CD80, CD86, CDH5, CDKN1B, CDKN2B, CEP57, CHRD, CHUK, CLU, COL1A1, COL1A2, COL3A1, CPS1, CREB1, CTDS…
GO:0051253	negative regulation of RNA metabolic process	GO_BiologicalProcess	1.6e-06	0.0037	[ACVR2B, ADGRG3, AHRR, AICDA, AJUBA, AKT2, ALX1, APEX1, ARID1A, ARID4A, ARID5A, ARNTL, ASCL1, ASF1A, ASXL1, ATAD2, ATAD2B, ATXN1, BACH1, BACH2, BARX2, BATF3, BCL11A, BCL6, BCL7A, BEND3, BIRC5, BMI1, BMP2, BMP6, BTAF1, BTG2, CALR, CASP8AP2, CAT, CBFA2T3, CBX4, CBY1, CCL4, CDK5R1, CDKN1B, CGGBP1, CHD8, CHP1, CIPC, CIR1, CNOT2, CPEB3, CREB1, CREM, CRY1, CTCF, CTNNB1, CUX1, DEPDC1, DICER1, DKK3, DMRT…
GO:0010647	positive regulation of cell communication	GO_BiologicalProcess	1.8e-06	0.0042	[ABAT, ABL2, ACPP, ACTN2, ACVR1, ACVR1B, ACVR2A, ACVR2B, ADAMTS3, ADORA2B, ADRA1A, ADRA2A, ADRA2B, ADRB2, AJUBA, AKAP12, AKR1C2, AKT2, ALS2, AMER1, APAF1, APEX1, APOL2, AREG, ARFGEF1, ARHGEF7, ARNTL, ARPP19, ASCL1, ASPH, ASPM, ASXL1, ATG7, ATP2C1, ATP6V1C2, ATR, BAMBI, BANK1, BBC3, BCL10, BCL2L1, BCL2L11, BDNF, BECN1, BMP10, BMP2, BMP6, BNIP2, BNIP3, BRD4, C10orf54, C18orf32, C5, C5AR1, C6orf89, …
GO:0048863	stem cell differentiation	GO_BiologicalProcess	2.1e-06	0.0048	[ACVR1, ALX1, AMER1, ASCL1, BAMBI, BMP2, C10orf54, CHD2, CLASP1, CNOT2, COL1A1, CTNNB1, DICER1, EDNRB, ELAVL1, ELL3, EPB41L5, EPCAM, ERBB4, EZH2, FAM101B, FGF13, FGF19, FGF2, FOXA1, FOXF2, FRZB, FZD1, GATA4, GDNF, GLIPR2, GSK3B, HAS2, HES1, HMGA2, HTR2B, ISL1, JARID2, KIT, KITLG, LDLRAD4, LIF, LIMS1, LTBP2, MSI2, MSTN, MSX2, MYOCD, N4BP2L2, NFE2L2, NFYA, NOG, NOTCH1, NRG1, OLFM1, PDGFRA, PDHX, PD…
GO:0010506	regulation of autophagy	GO_BiologicalProcess	2.3e-06	0.0054	[ABL2, ACTL6A, ADRB2, ATG7, BCL2L1, BECN1, BNIP3, CALCOCO2, CISD2, CSNK2A2, CTTN, DCN, DNPEP, EEF1A1, FBXW7, FEZ1, GATA4, GFAP, HMGB1, HTR2B, HTRA2, IAPP, IFI16, IFNG, IFT88, KDM4A, KDR, KIAA1324, LEPR, LZTS1, MAP1LC3B, MAPT, MET, MTDH, MTMR3, NRBP2, PAFAH1B2, PIK3R2, PIKFYVE, PINK1, PIP4K2B, PIP4K2C, PLK2, PRKAA1, PRKAA2, QSOX1, RAB33B, RAB3GAP1, RAB7A, RALB, RPL28, SCOC, SH3BP4, SIRT1, SNCA, SO…
GO:0051094	positive regulation of developmental process	GO_BiologicalProcess	2.4e-06	0.0057	[ABL2, ACVR1, ACVR1B, ACVR2A, ACVR2B, ADAMTS1, ADGRB1, ADGRB3, ADRA2B, ADRB2, AGGF1, ALOX12, ALX1, AMIGO2, AMOT, AMTN, ANGPT2, AP3D1, APBB1, APEX1, AREG, ARHGEF7, ARNTL, ARSB, ASCL1, ASPM, ATP11C, ATXN1, BAMBI, BCL11A, BCL6, BDNF, BMP10, BMP2, BMP6, BNIP2, BNIP3, BRINP3, BTG1, C10orf54, C5, C5AR1, C6, CALR, CAPRIN1, CBLB, CCNB1, CCNE1, CCR2, CD34, CD46, CD80, CD86, CDH5, CDK1, CLASP1, CLSTN2, CLU…
GO:0045934	negative regulation of nucleobase-containing compound metabolic process	GO_BiologicalProcess	2.5e-06	0.0059	[ACVR2B, ADGRG3, ADRA2A, AHRR, AICDA, AJUBA, AKT2, ALX1, APEX1, ARID1A, ARID4A, ARID5A, ARNTL, ASCL1, ASF1A, ASXL1, ATAD2, ATAD2B, ATR, ATXN1, BACH1, BACH2, BARX2, BATF3, BCL11A, BCL6, BCL7A, BEND3, BIRC5, BMI1, BMP2, BMP6, BTAF1, BTG2, CACNA1A, CALR, CASP8AP2, CAT, CBFA2T3, CBX4, CBY1, CCL4, CCR2, CDK5R1, CDKN1B, CERS1, CGGBP1, CHD8, CHP1, CIPC, CIR1, CNOT2, CPEB3, CREB1, CREM, CRY1, CTCF, CTNNB…
GO:2000736	regulation of stem cell differentiation	GO_BiologicalProcess	2.5e-06	0.0059	[ALX1, BAMBI, BMP2, C10orf54, CLASP1, CNOT2, COL1A1, CTNNB1, ELAVL1, ELL3, EPB41L5, EZH2, FOXA1, GATA4, GDNF, GLIPR2, GSK3B, HES1, HMGA2, LDLRAD4, LTBP2, MSTN, N4BP2L2, NFE2L2, NFYA, NOTCH1, OLFM1, PDGFRA, SAV1, SFRP1, SIX4, SMAD4, SMAD7, SMO, SOX5, SOX6, SRFBP1, STRAP, TBX5, TCL1A, TEAD1, TEAD3, TGFB3, TGFBR1, TGFBR2, WNT3A, WWTR1, YAP1, ZFP36L2, ZNF706]
GO:0007417	central nervous system development	GO_BiologicalProcess	2.5e-06	0.0059	[AARS, AATK, ABAT, ABL2, ACAT1, ACSL3, ACTL6A, ACVR1B, AGTPBP1, AK2, AK4, ALDH5A1, APAF1, APEX1, ARCN1, ARF4, ARHGEF28, ARID1A, ARL13B, ARL6, ARSB, ASCL1, ASPM, ATG7, ATP2B1, ATP5F1, ATP5J, ATP6V0D1, ATP7A, ATXN2, B3GNT5, BBS7, BCL2L11, BMP2, BTG2, C5AR1, CA10, CACNA1A, CALM1, CASP3, CCDC14, CCR2, CD8A, CD9, CDH1, CDH11, CDK5R1, CHD5, CHD6, CHD8, CHRD, CLN8, CLU, CNTN1, CNTN4, CNTNAP2, COL3A1, CO…
GO:0050769	positive regulation of neurogenesis	GO_BiologicalProcess	2.6e-06	0.0061	[ABL2, ADAMTS1, ADRA2B, APBB1, APEX1, ARHGEF7, ARSB, ASCL1, ASPM, ATXN1, BCL11A, BCL6, BDNF, BMP2, BMP6, BNIP2, BRINP3, CAPRIN1, CCR2, CNTN1, CPEB3, CPNE1, CTNNB1, CUX1, CXCL12, CXCR4, DICER1, DISC1, DMD, DNMT3B, DPYSL3, ECT2, ELL3, EPOR, ETV5, EZH2, FBXW8, FEZ1, FEZF1, FOXA1, FYCO1, GATA2, GDF5, GDF6, GDNF, GFAP, GLI3, GOLGA4, GSK3B, HES1, ID2, IFNG, ITPKA, ITSN2, KATNB1, KIF20B, KIT, LIF, LRP8,…
GO:0001655	urogenital system development	GO_BiologicalProcess	2.9e-06	0.0067	[ACAT1, ACTA2, ACVR2B, ADAMTS1, AMER1, ANGPT2, AREG, ARG2, BCL2L11, BDNF, BMP2, BMP6, CAT, CD34, CDKN1B, CNRIP1, CTNNB1, CUX1, CXCR2, CYP7B1, DCN, DLG5, DLL1, EGR1, ENPEP, EPCAM, EPHA7, EPHB2, EPHB3, ESR1, EYA1, FAT4, FBN1, FGF1, FGF13, FGF2, FOXA1, FOXF1, FRAS1, GATA2, GATA3, GCNT4, GDNF, GLI3, HAS2, HES1, HMGCS2, HNF1A, HOXA13, ID2, ID3, IFT88, IRX2, ITGA6, JMJD6, KCNJ1, KCNJ8, KIF26B, KLHL3, L…
GO:1903047	mitotic cell cycle process	GO_BiologicalProcess	2.9e-06	0.0068	[ACTR8, ACVR1, ACVR1B, AIF1, AJUBA, ANAPC13, ANKLE2, APEX1, ARHGEF2, ARPP19, ASPM, BACH1, BCL2L1, BECN1, BIRC5, BIRC6, BRCC3, BRD4, CACUL1, CASC5, CAV2, CCNA2, CCNB1, CCNE1, CCNF, CCNG1, CCNH, CCNK, CCSAP, CD2AP, CDC14A, CDC23, CDC26, CDCA8, CDK1, CDK2, CDKN1B, CDKN2B, CENPE, CEP126, CEP135, CEP41, CEP55, CEP57, CFH, CHEK1, CHMP2B, CHMP5, CHMP7, CKAP2, CLASP1, CLIP1, CLSPN, CLTC, CNEP1R1, CNTRL, …
GO:0044271	cellular nitrogen compound biosynthetic process	GO_BiologicalProcess	3.1e-06	0.0073	[AARS, ABCA1, ABCG1, ACADM, ACTL6A, ACTN1, ACTN2, ACTR8, ACVR1, ACVR1B, ACVR2A, ACVR2B, ADCY1, ADCY3, ADCY6, ADCYAP1R1, ADGRD1, ADGRG3, ADORA2B, ADRA2A, ADRB2, AFF3, AGO3, AGO4, AHCTF1, AHRR, AICDA, AIF1, AIMP1, AJUBA, AK2, AK4, AK5, AK9, AKAP12, AKT2, ALAD, ALOXE3, ALX1, AMPD3, ANKRD30A, ANKRD49, APBB1, APBB3, APEX1, AREG, ARF4, ARG2, ARHGEF11, ARHGEF2, ARHGEF7, ARID1A, ARID2, ARID3A, ARID4A, AR…
GO:0009967	positive regulation of signal transduction	GO_BiologicalProcess	4e-06	0.0092	[ABAT, ABL2, ACPP, ACTN2, ACVR1, ACVR1B, ACVR2A, ACVR2B, ADAMTS3, ADORA2B, ADRA1A, ADRA2A, ADRA2B, ADRB2, AJUBA, AKAP12, AKR1C2, AKT2, ALS2, AMER1, APAF1, APEX1, APOL2, AREG, ARFGEF1, ARHGEF7, ARNTL, ARPP19, ASCL1, ASPH, ASPM, ASXL1, ATP2C1, ATP6V1C2, ATR, BAMBI, BANK1, BBC3, BCL10, BCL2L1, BCL2L11, BDNF, BECN1, BMP10, BMP2, BMP6, BNIP2, BNIP3, BRD4, C10orf54, C18orf32, C5, C5AR1, C6orf89, CALM1,…
GO:0002009	morphogenesis of an epithelium	GO_BiologicalProcess	4.1e-06	0.0095	[ABL2, ACVR1, AJUBA, ALX1, APAF1, AREG, ARHGAP12, ARID1A, ARL13B, ATP7A, BBS5, BBS7, BCL10, BMP2, CCDC39, CHUK, CLASP1, CTNNB1, CXCL12, CXCR2, CYP7B1, DICER1, DLC1, DLG5, DLL1, DVL3, EPB41L5, EPHA2, EPHA7, ESR1, ETV5, EYA1, FAT4, FGF1, FGF13, FGF2, FGF7, FLRT3, FOXA1, FOXE1, FOXF1, FOXF2, FOXN4, FOXP1, FOXQ1, FRAS1, FRZB, FZD1, FZD6, GATA3, GATA4, GDNF, GJA1, GLI3, GRB2, GRSF1, HAND1, HES1, HOXA1…
GO:0007420	brain development	GO_BiologicalProcess	4.1e-06	0.0096	[AARS, AATK, ABAT, ABL2, ACAT1, ACSL3, AGTPBP1, AK2, AK4, APAF1, APEX1, ARCN1, ARF4, ARID1A, ARL13B, ARL6, ASCL1, ASPM, ATG7, ATP2B1, ATP5F1, ATP5J, ATP6V0D1, ATP7A, ATXN2, B3GNT5, BBS7, BCL2L11, BMP2, BTG2, C5AR1, CA10, CACNA1A, CALM1, CASP3, CCDC14, CCR2, CD9, CDH1, CDK5R1, CHD5, CHD6, CHD8, CHRD, CNTN1, CNTN4, CNTNAP2, COL3A1, COLEC12, CREB1, CTNNB1, CUL5, CXCL12, CXCR2, CXCR4, DCLK1, DFNB31, …
GO:0022604	regulation of cell morphogenesis	GO_BiologicalProcess	4.4e-06	0.01	[AATK, ADGRB3, ALX1, ANXA7, AP1AR, APEX1, ARHGAP18, ARHGEF7, BAMBI, BCL11A, BDNF, BMP2, BRWD1, BRWD3, BVES, CACNA1A, CALR, CAPRIN1, CCL7, CCR2, CDC42EP1, CDC42EP3, CDC42SE2, CDK5R1, CHRNA3, CLASP1, COCH, COL1A1, CTNNB1, CTTN, CUX1, CXCL12, DCC, DCDC2, DISC1, DLC1, ELL3, EPB41L3, EPB41L5, EPHA7, EPHB3, EVI5, EZH2, F2, FAM21C, FBXW8, FERMT2, FGA, FGB, FGD3, FGD4, FGD5, FGD6, FGF13, FGG, FOXA1, FYCO…
GO:0045664	regulation of neuron differentiation	GO_BiologicalProcess	4.7e-06	0.01	[AATK, ABL2, ADAMTS1, ADCY6, ADGRB3, ADRA2B, APBB1, ARHGEF7, ARSB, ASAP1, ASCL1, ASPM, BCL11A, BCL6, BDNF, BMP2, BMP6, BNIP2, BRINP3, CACNA1A, CALR, CAPRIN1, CCDC88A, CCR2, CDK5R1, CHODL, CHRNA3, CNTF, CNTN1, CNTN4, CPEB3, CPNE1, CTTN, CUX1, CXCL12, DCC, DICER1, DISC1, DLL1, DMD, DNMT3B, DPYSL3, ECT2, EDNRB, EPHA7, EPHB3, EPOR, ETV5, EYA1, EZH2, FBXW8, FEZ1, FEZF1, FGF13, FOXA1, FYCO1, GATA2, GAT…
GO:0023056	positive regulation of signaling	GO_BiologicalProcess	6.2e-06	0.014	[ABAT, ABL2, ACPP, ACTN2, ACVR1, ACVR1B, ACVR2A, ACVR2B, ADAMTS3, ADORA2B, ADRA1A, ADRA2A, ADRA2B, ADRB2, AJUBA, AKAP12, AKR1C2, AKT2, ALS2, AMER1, APAF1, APEX1, APOL2, AREG, ARFGEF1, ARHGEF7, ARNTL, ARPP19, ASCL1, ASPH, ASPM, ASXL1, ATP2C1, ATP6V1C2, ATR, BAMBI, BANK1, BBC3, BCL10, BCL2L1, BCL2L11, BDNF, BECN1, BMP10, BMP2, BMP6, BNIP2, BNIP3, BRD4, BVES, C10orf54, C18orf32, C5, C5AR1, C6orf89, …
GO:0048584	positive regulation of response to stimulus	GO_BiologicalProcess	8.1e-06	0.018	[ABAT, ABL2, ACPP, ACTN2, ACTR2, ACVR1, ACVR1B, ACVR2A, ACVR2B, ADAMTS3, ADORA2B, ADRA1A, ADRA2A, ADRA2B, ADRB2, AIF1, AJUBA, AKAP12, AKR1C2, AKT2, ALS2, AMER1, APAF1, APBB1, APEX1, APOL2, AREG, ARFGEF1, ARHGEF7, ARNTL, ARPP19, ASCL1, ASPH, ASPM, ASXL1, ATG7, ATP2C1, ATP6V1C2, ATR, BAMBI, BANK1, BBC3, BCL10, BCL2L1, BCL2L11, BDNF, BECN1, BMP10, BMP2, BMP6, BNIP2, BNIP3, BRCC3, BRD4, C10orf54, C18…
GO:0048729	tissue morphogenesis	GO_BiologicalProcess	8e-06	0.018	[ABL2, ACTA2, ACVR1, AJUBA, ALX1, APAF1, AREG, ARHGAP12, ARID1A, ARL13B, ARL6, ATP7A, BBS5, BBS7, BCL10, BMP10, BMP2, CCDC39, CHRD, CHUK, CLASP1, COL3A1, CTNNB1, CXCL12, CXCR2, CYP7B1, DICER1, DLC1, DLG5, DLL1, DVL3, EGLN1, EPB41L5, EPHA2, EPHA7, ESR1, ETV5, EXOC4, EXT2, EYA1, FAT4, FGF1, FGF13, FGF2, FGF7, FLRT3, FOXA1, FOXE1, FOXF1, FOXF2, FOXN4, FOXP1, FOXQ1, FRAS1, FRZB, FZD1, FZD6, GATA3, GA…
GO:0060560	developmental growth involved in morphogenesis	GO_BiologicalProcess	8.8e-06	0.02	[AATK, AREG, BCL11A, BDNF, CCR2, CDK5R1, CPNE1, CTTN, CXCL12, DCC, DCLK1, DISC1, EPB41L5, EPHA7, ESR1, FGF1, FGF13, FLRT1, FLRT3, FYCO1, GOLGA4, GSK3B, ITSN2, KDM5B, KIF26B, LMNB2, MACF1, MAGI2, MAPT, MESP1, NEDD4L, NKD1, NOTCH1, NRG1, OGN, OLFM1, OMG, PLXNA1, PLXNA2, PLXNA4, PLXNC1, PPP2R3A, PTHLH, RAB11A, RAB21, RAPH1, RIMS2, ROBO1, RYK, S1PR1, SALL1, SEMA3A, SEMA3C, SEMA4B, SEMA4F, SEMA4G, SEM…
GO:0040029	regulation of gene expression, epigenetic	GO_BiologicalProcess	9.4e-06	0.021	[AGO3, AGO4, AICDA, AJUBA, ARID1A, ARID4A, ARID4B, ASF1A, ATAD2, ATAD2B, BEND3, CCNH, CHEK1, CNOT7, COLEC12, CTCF, CTCFL, CTNNB1, DEK, DICER1, DNMT1, DNMT3B, EIF1, EP300, ERCC3, ERCC6, EZH2, GSK3B, GTF2H1, GTF2H3, H2AFZ, HAT1, HIST1H2AA, HIST1H2AB, HIST1H2AD, HIST1H2AH, HIST1H2AJ, HIST1H3A, HIST2H2AA3, HIST2H3A, HIST3H2A, IFI16, JARID2, KDM1B, LIN28B, MBD2, MIER1, MNAT1, MRPL44, MYO1E, PHF2, PHF8…
GO:0001701	in utero embryonic development	GO_BiologicalProcess	9.5e-06	0.021	[ACVR1, ACVR1B, ADD1, ALS2, AMOT, ANKRD11, AREG, ATP7A, BCL2L1, BCL2L11, BIRC6, BMP2, BNIP2, BRD4, C5, C6, CAPN2, CCNB1, CCNK, CHD8, CNOT2, CTNNB1, DAD1, DSC2, E2F7, E2F8, EGLN1, EIF2S2, ELF3, ELL, EPAS1, EPB41L5, FBXW8, FOSL1, FOXF1, G2E3, GATA2, GATA3, GATA4, GJA1, GLI3, GRB2, HAND1, HES1, HNF1A, ICMT, IL10, JUNB, KDM6A, LATS1, LIF, LRP1B, MAFF, MAFG, MAP2K1, MDFI, MECOM, MED21, MFN2, MIA3, MIB…
GO:0018193	peptidyl-amino acid modification	GO_BiologicalProcess	1e-05	0.023	[AATK, ABL2, ACTL6A, ACVR1, ACVR1B, ADRA2A, ADRA2B, ADRBK1, AGBL3, AGTPBP1, AKT2, AKT3, ALG10, ALG10B, ALG2, ALG6, ANK1, APBB1, ARCN1, AREG, ARF4, ARHGEF2, ARID4A, ARID4B, ARID5A, ASH1L, ASH2L, ASPH, ATG7, ATP7A, ATR, B4GALT4, BCAR3, BCL11A, BEND3, BET1, BIRC5, BMI1, BRD4, CALM1, CALR, CAMKK2, CBX4, CCNB1, CD55, CD80, CDCA8, CDK1, CDK2, CDK5R1, CEP41, CHD5, CHD6, CHEK1, CLASP1, CLSPN, CMAS, CNIH1…
GO:0065003	macromolecular complex assembly	GO_BiologicalProcess	1.1e-05	0.025	[ABCA1, ACADL, ACADM, ACADS, ACAT1, ACOT13, ACSL3, ACTN2, ACTR2, ACTR3B, ADD1, ADRB2, AGO3, AGO4, AHCTF1, AIF1, AJUBA, ALAD, ALDH5A1, ALDOB, AMFR, AP1AR, AP2B1, APAF1, AQP11, AREG, ARFGEF1, ARFIP2, ARHGAP18, ARHGEF7, ARL6, ASF1A, ASPM, ATL1, ATP6V0A2, ATPAF1, ATPAF2, ATR, ATXN2, ATXN2L, BBC3, BCL10, BCL11A, BCL2L11, BET1, BIRC5, C10orf2, C1QTNF6, CALHM1, CALR, CAND1, CAPZA1, CAPZA2, CASC5, CAT, C…
GO:0048812	neuron projection morphogenesis	GO_BiologicalProcess	1.1e-05	0.027	[AATK, ABL2, ACTN2, ACTR2, ADCY1, ADGRB1, ADGRB3, ALS2, ANK1, AP2B1, AP2M1, APBB1, APH1B, ARHGEF11, ARHGEF28, ARHGEF7, ATG7, ATL1, ATP7A, ATXN2, B4GAT1, BCL11A, BDNF, C6orf89, CACNA1A, CACNA1C, CACNA1D, CACNA1H, CACNB1, CALM1, CAP2, CAPRIN1, CCR2, CDH11, CDK5R1, CHRNA3, CLASP1, CLU, CNTN1, CNTN4, COL3A1, COL5A2, COL6A3, COL9A1, CPNE1, CREB1, CSNK2A1, CSNK2A2, CTTN, CUX1, CXCL12, DCC, DCDC2, DCLK1…
GO:0072001	renal system development	GO_BiologicalProcess	1.4e-05	0.033	[ACAT1, ACTA2, ACVR2B, ADAMTS1, AMER1, ANGPT2, ARG2, BCL2L11, BDNF, BMP2, BMP6, CAT, CD34, CTNNB1, CUX1, CXCR2, DCN, DLG5, DLL1, EGR1, ENPEP, EPCAM, EPHA7, EYA1, FAT4, FBN1, FGF1, FGF13, FGF2, FOXF1, FRAS1, GATA3, GCNT4, GDNF, GLI3, HAS2, HES1, HMGCS2, HNF1A, ID2, ID3, IFT88, IRX2, ITGA6, JMJD6, KCNJ1, KCNJ8, KIF26B, KLHL3, LIF, LMNB2, MAGI2, MECOM, MMP12, MTSS1, MYO1E, MYOCD, NEK1, NID1, NOG, NO…
GO:0071363	cellular response to growth factor stimulus	GO_BiologicalProcess	1.6e-05	0.037	[ACTN2, ACVR1, ACVR2A, ACVR2B, ADAMTS3, ADCY1, ADCY3, ADCY6, ADCYAP1R1, ADRBK1, AGO3, AGO4, AKAP13, ANGPT2, AP2B1, AP2M1, APAF1, APEX1, APH1B, ARHGEF11, ARHGEF2, ARHGEF4, ARHGEF7, ATP1B4, BAMBI, BCL2L11, BECN1, BMP10, BMP2, BMP6, C10orf54, C6orf89, CALM1, CASP3, CAT, CAV2, CCNA2, CCNC, CCNK, CD80, CD86, CDH5, CDKN1B, CDKN2B, CEP57, CHRD, CHUK, CLU, COL1A1, COL1A2, COL3A1, CPS1, CREB1, CTDSPL2, CT…
GO:0016568	chromatin modification	GO_BiologicalProcess	1.7e-05	0.039	[ACTL6A, ACTR8, AICDA, ANP32E, APBB1, ARID1A, ARID2, ARID4A, ARID4B, ARID5A, ASF1A, ASH1L, ASH2L, ASXL1, ATAD2, ATAD2B, ATG7, ATXN7, BAZ1A, BCL6, BCORL1, BEND3, BMI1, BRCC3, BRD3, BRD4, C6orf89, CASC5, CBX4, CCNB1, CDK1, CDK2, CENPL, CENPQ, CHD1L, CHD2, CHD3, CHD5, CHD6, CHD8, CHEK1, CPA4, CTCF, CTCFL, CTNNB1, CUL4B, DEK, DNMT1, DNMT3B, DR1, DTX3L, ELK4, ELP3, EP300, EPC2, ESR1, EYA1, EYA3, EZH2,…
GO:0009892	negative regulation of metabolic process	GO_BiologicalProcess	1.9e-05	0.043	[ABCE1, ACADL, ACVR1B, ACVR2B, ADGRG3, ADRA2A, AGO3, AGO4, AHRR, AICDA, AIF1, AJUBA, AKT2, ALX1, AMOT, ANKLE2, ANKS1B, ANP32E, ANXA7, AP1AR, APBB1, APEX1, AREG, ARFGEF1, ARID1A, ARID4A, ARID4B, ARID5A, ARNTL, ARPP19, ASB1, ASCL1, ASF1A, ASH1L, ASXL1, ATAD2, ATAD2B, ATG7, ATP7A, ATR, ATXN1, ATXN2, ATXN7, AZIN1, BACE2, BACH1, BACH2, BANK1, BARX2, BATF3, BCL11A, BCL2L1, BCL2L12, BCL6, BCL7A, BECN1, …
GO:0019538	protein metabolic process	GO_BiologicalProcess	2.1e-05	0.048	[A4GALT, AARS, AATK, ABCA1, ABCG1, ABL2, ACTL6A, ACTN2, ACVR1, ACVR1B, ACVR1C, ACVR2A, ACVR2B, ADAM11, ADAM12, ADAMTS1, ADAMTS3, ADAMTS8, ADAMTSL4, ADCY1, ADCY3, ADCY6, ADD1, ADORA2B, ADPRH, ADRA1A, ADRA2A, ADRA2B, ADRB2, ADRBK1, AGBL3, AGO3, AGO4, AGTPBP1, AIF1, AIMP1, AJUBA, AKAP13, AKT2, AKT3, AKTIP, ALG10, ALG10B, ALG2, ALG6, ALOX12, ALS2, AMER1, AMFR, ANAPC13, ANK1, ANKLE2, ANKS1B, ANPEP, AP…
GO:0044424	intracellular part	GO_CellularComponent	8.9e-36	2.1e-32	[A4GALT, AADAT, AAMP, AARS, AATK, ABAT, ABCA1, ABCA10, ABCA13, ABCA9, ABCB10, ABCC4, ABCC9, ABCD2, ABCD3, ABCE1, ABCG1, ABHD6, ABL2, ACADL, ACADM, ACADS, ACAT1, ACBD3, ACBD5, ACKR4, ACO2, ACOT13, ACPP, ACSBG1, ACSL3, ACSL4, ACSL5, ACSL6, ACSM5, ACTA2, ACTL6A, ACTN1, ACTN2, ACTR2, ACTR3B, ACTR8, ACVR2A, ACVR2B, ADAM12, ADAMTS1, ADAMTSL4, ADCY1, ADCY3, ADCY6, ADCYAP1R1, ADD1, ADD3, ADGRB1, ADGRF5, …
GO:0043229	intracellular organelle	GO_CellularComponent	3.5e-27	8.7e-24	[A4GALT, AADAT, AAMP, AARS, AATK, ABAT, ABCA1, ABCA10, ABCA13, ABCA9, ABCB10, ABCC4, ABCC9, ABCD2, ABCD3, ABCE1, ABCG1, ABHD6, ABL2, ACADL, ACADM, ACADS, ACAT1, ACBD3, ACBD5, ACKR4, ACO2, ACOT13, ACPP, ACSBG1, ACSL3, ACSL4, ACSL5, ACSL6, ACSM5, ACTA2, ACTL6A, ACTN1, ACTN2, ACTR2, ACTR3B, ACTR8, ADAM12, ADAMTS1, ADAMTSL4, ADCY1, ADCY3, ADCY6, ADCYAP1R1, ADD1, ADD3, ADGRB1, ADGRF5, ADPGK, ADRA1A, A…
GO:0043231	intracellular membrane-bounded organelle	GO_CellularComponent	2.8e-24	6.8e-21	[A4GALT, AADAT, AARS, AATK, ABAT, ABCA1, ABCA10, ABCA13, ABCA9, ABCB10, ABCC4, ABCD2, ABCD3, ABCE1, ABCG1, ABHD6, ACADL, ACADM, ACADS, ACAT1, ACBD3, ACBD5, ACKR4, ACO2, ACOT13, ACPP, ACSBG1, ACSL3, ACSL4, ACSL5, ACSL6, ACSM5, ACTL6A, ACTN1, ACTN2, ACTR8, ADAM12, ADAMTSL4, ADCY1, ADCY3, ADCY6, ADCYAP1R1, ADD1, ADD3, ADPGK, ADRA1A, ADRA2A, ADRB2, AEN, AFF3, AGFG1, AGPAT5, AGPS, AGTPBP1, AHCTF1, AHC…
GO:0005654	nucleoplasm	GO_CellularComponent	8.5e-23	2e-19	[ABCG1, ACBD5, ACTL6A, ADAM12, ADD1, ADD3, AEN, AFF3, AHCTF1, AK5, AK9, AKIRIN1, AKT2, AKT3, ALDH6A1, ALX1, ANKRD11, ANKS1B, AP3D1, APBB1, APEX1, APLF, APPL1, AREG, ARFGEF1, ARID1A, ARID2, ARID3A, ARID4A, ARID4B, ARID5A, ARNTL, ARPP19, ASCC3, ASF1A, ASH1L, ASH2L, ATAD2, ATP5F1, ATPAF2, ATR, ATXN1, ATXN2, ATXN2L, ATXN7, BBX, BCL11A, BCORL1, BDP1, BIRC5, BLZF1, BMI1, BMP2K, BNIP3, BRCC3, BRD4, BTAF…
GO:0005737	cytoplasm	GO_CellularComponent	4.7e-22	1.1e-18	[A4GALT, AADAT, AAMP, AARS, AATK, ABAT, ABCA1, ABCA9, ABCB10, ABCC4, ABCC9, ABCD2, ABCD3, ABCE1, ABCG1, ABHD6, ABL2, ACADL, ACADM, ACADS, ACAT1, ACBD3, ACBD5, ACKR4, ACO2, ACOT13, ACPP, ACSBG1, ACSL3, ACSL4, ACSL5, ACSL6, ACSM5, ACTA2, ACTN1, ACTN2, ACTR2, ACTR3B, ACVR2A, ACVR2B, ADAM12, ADAMTS1, ADAMTSL4, ADCY1, ADCY3, ADCY6, ADCYAP1R1, ADD1, ADD3, ADGRF5, ADH1B, ADH6, ADPGK, ADPRM, ADRA1A, ADRA…
GO:0031981	nuclear lumen	GO_CellularComponent	5.1e-22	1.2e-18	[ABCG1, ACBD5, ACSL5, ACTL6A, ACTR8, ADAM12, ADD1, ADD3, AEN, AFF3, AGPS, AHCTF1, AK5, AK9, AKIRIN1, AKT2, AKT3, AKTIP, ALDH6A1, ALX1, ANKRD11, ANKS1B, ANP32E, AP3D1, APBB1, APEX1, APLF, APPL1, AREG, ARFGEF1, ARID1A, ARID2, ARID3A, ARID4A, ARID4B, ARID5A, ARNTL, ARPP19, ASCC3, ASF1A, ASH1L, ASH2L, ASXL1, ATAD2, ATF7IP2, ATP5F1, ATPAF2, ATR, ATXN1, ATXN2, ATXN2L, ATXN7, BAZ1A, BBX, BCL11A, BCORL1,…
GO:0044446	intracellular organelle part	GO_CellularComponent	2e-19	5.1e-16	[A4GALT, AADAT, ABAT, ABCA9, ABCB10, ABCC4, ABCD2, ABCD3, ABCE1, ABCG1, ACADL, ACADM, ACADS, ACAT1, ACBD3, ACBD5, ACO2, ACOT13, ACPP, ACSL3, ACSL4, ACSL5, ACSL6, ACSM5, ACTL6A, ACTN1, ACTN2, ACTR2, ACTR3B, ACTR8, ADAM12, ADAMTSL4, ADD1, ADD3, ADRA1A, AEN, AFF3, AGFG1, AGPAT5, AGPS, AHCTF1, AHCYL1, AHRR, AIF1, AJUBA, AK2, AK4, AK5, AK9, AKIRIN1, AKR1B10, AKR1B15, AKT2, AKT3, AKTIP, ALDH5A1, ALDH6A…
GO:0044428	nuclear part	GO_CellularComponent	8.7e-19	2.1e-15	[ABCG1, ACBD5, ACSL5, ACTL6A, ACTR8, ADAM12, ADD1, ADD3, ADRA1A, AEN, AFF3, AGFG1, AGPAT5, AGPS, AHCTF1, AHRR, AK5, AK9, AKIRIN1, AKT2, AKT3, AKTIP, ALDH6A1, ALX1, AMOT, AMOTL1, ANAPC13, ANKRD11, ANKS1B, ANP32E, ANXA7, AP3D1, APBB1, APEX1, APLF, APPL1, AREG, ARFGEF1, ARID1A, ARID2, ARID3A, ARID4A, ARID4B, ARID5A, ARNTL, ARPP19, ASCC3, ASF1A, ASH1L, ASH2L, ASXL1, ATAD2, ATF7IP2, ATP11B, ATP1B4, AT…
GO:0005634	nucleus	GO_CellularComponent	1e-17	2.4e-14	[A4GALT, ABCG1, ACADM, ACADS, ACBD5, ACO2, ACOT13, ACPP, ACSL5, ACTL6A, ACTR8, ADAM12, ADCY1, ADCY3, ADD1, ADD3, ADRA1A, ADRA2A, ADRB2, AEN, AFF3, AGFG1, AGPAT5, AGPS, AGTPBP1, AHCTF1, AHRR, AICDA, AIF1, AIMP1, AJUBA, AK5, AK9, AKAP13, AKIRIN1, AKT2, AKT3, AKTIP, ALAD, ALDH6A1, ALDOB, ALG2, ALX1, AMER1, AMFR, AMIGO2, AMOT, AMOTL1, ANAPC13, ANGPT2, ANK1, ANKRD11, ANKRD30A, ANKRD34B, ANKRD49, ANKS1…
GO:0070013	intracellular organelle lumen	GO_CellularComponent	7.4e-17	1.8e-13	[AADAT, ABAT, ABCD3, ABCE1, ABCG1, ACADL, ACADM, ACADS, ACAT1, ACBD5, ACO2, ACSL5, ACSM5, ACTL6A, ACTR8, ADAM12, ADAMTSL4, ADD1, ADD3, AEN, AFF3, AGPS, AHCTF1, AK4, AK5, AK9, AKIRIN1, AKR1B15, AKT2, AKT3, AKTIP, ALDH5A1, ALDH6A1, ALX1, ANKRD11, ANKS1B, ANP32E, AP3D1, AP4E1, AP4M1, APBB1, APEX1, APLF, APPL1, AREG, ARFGEF1, ARG2, ARID1A, ARID2, ARID3A, ARID4A, ARID4B, ARID5A, ARNTL, ARPP19, ARSB, A…
GO:0044444	cytoplasmic part	GO_CellularComponent	4.9e-12	1.1e-08	[A4GALT, AADAT, AARS, AATK, ABAT, ABCA1, ABCA9, ABCB10, ABCC4, ABCC9, ABCD2, ABCD3, ABCE1, ABCG1, ABHD6, ABL2, ACADL, ACADM, ACADS, ACAT1, ACBD3, ACBD5, ACKR4, ACO2, ACOT13, ACPP, ACSBG1, ACSL3, ACSL4, ACSL5, ACSL6, ACSM5, ACTA2, ACTN1, ACTN2, ACTR2, ADAM12, ADAMTS1, ADAMTSL4, ADCY3, ADCY6, ADCYAP1R1, ADD1, ADD3, ADGRF5, ADH1B, ADH6, ADPGK, ADPRM, ADRA1A, ADRB2, ADRBK1, AGBL3, AGFG1, AGGF1, AGO3,…
GO:0044427	chromosomal part	GO_CellularComponent	6.1e-10	1.4e-06	[A4GALT, ACTL6A, ACTR8, AHCTF1, ANP32E, APEX1, APLF, AREG, ARID1A, ASF1A, ASH2L, ASXL1, ATP1B4, ATR, BCL6, BEND3, BIRC5, BRD4, CAPN2, CASC5, CCNB1, CCND2, CDCA8, CDK1, CDK2, CENPE, CENPL, CENPQ, CHD5, CHD6, CHEK1, CLASP1, CLIP1, CLTC, CNGB1, CREB1, CSNK2A1, CSNK2A2, CTCF, CTNNB1, DCLRE1A, DCLRE1C, DCTN1, DCTN6, DNMT1, DNMT3B, DPF2, DVL3, DYNC1I1, DYNC1LI1, EID3, ELL, ERCC4, ESCO1, ESCO2, ESR1, ET…
GO:0005694	chromosome	GO_CellularComponent	2.7e-09	6.6e-06	[A4GALT, ACTL6A, ACTR8, ADD3, AHCTF1, ANP32E, APEX1, APLF, AREG, ARID1A, ASF1A, ASH1L, ASH2L, ASXL1, ATP1B4, ATR, BAZ1A, BCL6, BEND3, BIRC5, BRD4, CAPN2, CASC5, CCNB1, CCND2, CDCA8, CDK1, CDK2, CENPE, CENPL, CENPQ, CHD5, CHD6, CHEK1, CLASP1, CLIP1, CLTC, CNGB1, CREB1, CSNK2A1, CSNK2A2, CTCF, CTNNB1, DCLRE1A, DCLRE1C, DCTN1, DCTN6, DNMT1, DNMT3B, DPF2, DVL3, DYNC1I1, DYNC1LI1, EID3, ELL, ERCC4, ES…
GO:0043232	intracellular non-membrane-bounded organelle	GO_CellularComponent	1.8e-08	4.2e-05	[A4GALT, AAMP, ABCC9, ABL2, ACOT13, ACSL3, ACSL4, ACSL5, ACTA2, ACTL6A, ACTN1, ACTN2, ACTR2, ACTR3B, ACTR8, ADD1, ADD3, ADGRB1, ADRA1A, AEN, AFAP1, AGO3, AGO4, AGPS, AHCTF1, AIF1, AJUBA, AK5, AKAP12, AKTIP, ALDOB, ALS2, AMOT, ANK1, ANKS1B, ANP32E, APBB3, APEX1, APLF, APPBP2, AREG, ARFGEF1, ARHGAP26, ARHGEF2, ARID1A, ARID3A, ARID5A, ARL6, ARNTL, ASF1A, ASH1L, ASH2L, ASPM, ASXL1, ATF7IP2, ATP1B4, A…
GO:0005815	microtubule organizing center	GO_CellularComponent	5.3e-08	0.00012	[ACTR8, AJUBA, AK5, ALDOB, ALS2, APEX1, ATP6V0D1, BBOF1, BBS1, BBS5, BBS7, BCL2L1, BIRC5, BIRC6, BNIP2, C2CD5, C7orf31, CALM1, CAMSAP2, CBY1, CCDC13, CCDC14, CCDC67, CCNB1, CCNE1, CCNF, CCSAP, CDC14A, CDK1, CDK2, CDKL2, CEP104, CEP126, CEP135, CEP19, CEP41, CEP44, CEP55, CEP57, CEP85L, CEP95, CHD3, CHEK1, CIR1, CKAP2, CLASP1, CLIP1, CNTLN, CNTRL, CTNNB1, DCAF12, DCAF13, DCTN1, DCTN6, DDHD2, DFNB3…
GO:0000785	chromatin	GO_CellularComponent	2.9e-07	0.00068	[A4GALT, ACTL6A, ACTR8, AHCTF1, ANP32E, AREG, ARID1A, ASF1A, ASH2L, ASXL1, ATP1B4, BEND3, BRD4, CAPN2, CCND2, CHD5, CHD6, CHEK1, CREB1, CSNK2A1, CSNK2A2, CTNNB1, DNMT1, DNMT3B, DPF2, DVL3, ELL, ESCO1, ESCO2, ESR1, ETV3, EZH2, FAM60A, FBXO18, GATA3, H2AFZ, HAT1, HIRA, HIST1H1B, HIST1H1C, HIST1H1D, HIST1H1E, HIST1H1T, HIST1H2AA, HIST1H2AB, HIST1H2AD, HIST1H2AH, HIST1H2AJ, HIST1H2AK, HIST1H2BA, HIST…
GO:0005829	cytosol	GO_CellularComponent	7.6e-07	0.0017	[AARS, ABCD2, ABCD3, ABL2, ACKR4, ACOT13, ACSBG1, ACTA2, ACTN1, ACTN2, ACTR2, ADD1, ADD3, ADH1B, ADH6, ADPRM, ADRA1A, ADRBK1, AGBL3, AGO3, AGO4, AGTPBP1, AHCTF1, AHCYL1, AHCYL2, AIF1, AIMP1, AJUBA, AK2, AK5, AK9, AKAP13, AKR1A1, AKR1B10, AKR1B15, AKT2, ALAD, ALDH8A1, ALDOB, ALOX12, ALS2, AMDHD1, AMER1, AMOT, AMOTL1, AMPD3, ANK1, ANPEP, ANXA7, AP2B1, AP2M1, APAF1, APLF, APPL1, AQP11, ARAP2, ARCN1,…
GO:0005813	centrosome	GO_CellularComponent	1.9e-06	0.0045	[ACTR8, ALDOB, ALS2, APEX1, ATP6V0D1, BBS1, BBS7, BCL2L1, BIRC5, BNIP2, C7orf31, CALM1, CAMSAP2, CCDC13, CCDC14, CCDC67, CCNB1, CCNE1, CCNF, CCSAP, CDC14A, CDK1, CDK2, CDKL2, CEP104, CEP126, CEP135, CEP19, CEP41, CEP44, CEP55, CEP57, CEP85L, CEP95, CHD3, CHEK1, CKAP2, CLASP1, CLIP1, CNTLN, CNTRL, CTNNB1, DCAF12, DCAF13, DCTN1, DCTN6, DISC1, DLGAP5, DPF2, DYNC1LI1, DYNC1LI2, DYNLL2, ELL2, EYA3, FE…
GO:0005840	ribosome	GO_CellularComponent	2.4e-06	0.0057	[APEX1, C12orf65, DAP3, DNAJC21, MRPL30, MRPL35, MRPL39, MRPL44, MRPS16, MRPS17, MRPS26, MRPS36, NCK1, NSUN4, NUFIP1, RPL14, RPL28, RPL37, RPL7L1, RPL9, RPS25, RPS6KA2, SF1, SNCA, SPPL2A]
GO:0005794	Golgi apparatus	GO_CellularComponent	2.9e-06	0.0067	[A4GALT, ABCA1, ABCG1, ACBD3, ACPP, ACSL3, ADCY3, AIMP1, AKR1B10, AKT3, AKTIP, ALX1, AP1AR, AP2B1, AP3D1, AP4E1, AP4M1, ARCN1, AREG, ARF4, ARFGEF1, ARFIP2, ARHGEF2, ARID3A, ARL17A, ARL17B, ARSB, ASCC3, ASH1L, ATL1, ATP11B, ATP2C1, ATP7A, ATP9A, ATP9B, ATR, ATXN2, B3GALT1, B3GALT4, B3GALT5, B3GAT3, B3GNT5, B4GALT4, B4GAT1, BACE1, BACE2, BECN1, BET1, BIRC6, BLZF1, C1GALT1C1, C3orf58, C6orf89, CALR,…
GO:0015630	microtubule cytoskeleton	GO_CellularComponent	3.9e-06	0.009	[AAMP, ACOT13, ACTR8, AJUBA, AK5, ALDOB, ALS2, APEX1, APPBP2, ARHGEF2, ARL6, ASPM, ATP6V0D1, ATXN7, BBOF1, BBS1, BBS5, BBS7, BCL10, BCL2L1, BCL2L11, BIRC5, BIRC6, BNIP2, BRCC3, C2CD5, C7orf31, CALM1, CAMSAP2, CBY1, CCDC13, CCDC14, CCDC67, CCNB1, CCNE1, CCNF, CCSAP, CCSER2, CCT3, CDC14A, CDCA8, CDK1, CDK2, CDKL2, CENPE, CEP104, CEP126, CEP135, CEP19, CEP41, CEP44, CEP55, CEP57, CEP85L, CEP95, CHD3…
GO:0044391	ribosomal subunit	GO_CellularComponent	5e-06	0.011	[C12orf65, DAP3, MRPL30, MRPS16, MRPS17, MRPS26, MRPS36, NSUN4, RPL14, RPL28, RPL37, RPL7L1, RPL9, RPS25, SPPL2A]
GO:0022626	cytosolic ribosome	GO_CellularComponent	6.8e-06	0.015	[NUFIP1, RPL14, RPL28, RPL37, RPL7L1, RPL9, RPS25]
GO:0000228	nuclear chromosome	GO_CellularComponent	1.4e-05	0.034	[ACTL6A, ACTR8, ADD3, ANP32E, APEX1, AREG, ARID1A, ASF1A, ASH2L, ASXL1, ATR, BAZ1A, BEND3, BIRC5, BRD4, CCNB1, CDK1, CENPE, CHEK1, CNGB1, CREB1, CSNK2A1, CSNK2A2, CTNNB1, DCLRE1A, DCLRE1C, DNMT3B, DPF2, DVL3, ERCC4, ESCO2, ESR1, ETV3, EZH2, FAM60A, FEN1, FKBP6, GATA3, H2AFZ, HAT1, HIRA, HIST1H1B, HIST1H1C, HIST1H1D, HIST1H1E, HIST1H1T, HIST1H2AA, HIST1H2AB, HIST1H2AD, HIST1H2AH, HIST1H2AJ, HIST1H…
GO:0004930	G-protein coupled receptor activity	GO_MolecularFunction	1.8e-18	4.3e-15	[ACKR4, ADCYAP1R1, ADGRA3, ADGRB1, ADGRB3, ADGRD1, ADGRE5, ADGRF2, ADGRF5, ADGRG3, ADORA2B, ADRA1A, ADRA2A, ADRA2B, ADRB2, C5AR1, CALCR, CALCRL, CCKBR, CCR2, CCR5, CCR9, CD200R1, CHRM5, CNR2, CXCR2, CXCR4, CXCR6, DHX15, DRD5, EDNRB, ELOVL4, FFAR2, FRZB, FZD1, FZD10, FZD4, FZD6, FZD8, GLP1R, GNRHR, GPR132, GPR156, GPR160, GPR171, GPR3, GPR37, GPR61, GPR63, GPR68, GPR85, GRM3, GRM5, GRM7, HCAR1, HR…
GO:0004888	transmembrane signaling receptor activity	GO_MolecularFunction	3e-09	7.2e-06	[ABCA1, ABCC9, ACKR4, ACVR1, ACVR1B, ACVR1C, ACVR2A, ACVR2B, ADCYAP1R1, ADGRA3, ADGRB1, ADGRB3, ADGRD1, ADGRE5, ADGRF2, ADGRF5, ADGRG3, ADORA2B, ADRA1A, ADRA2A, ADRA2B, ADRB2, ASIC5, C12orf76, C5AR1, CALCR, CALCRL, CCKBR, CCR2, CCR5, CCR9, CD160, CD200R1, CD3G, CD5, CHRM5, CHRNA2, CHRNA3, CHRNA9, CNGB1, CNR2, CNTN1, CRIM1, CSF3R, CXCR2, CXCR4, CXCR6, DCC, DDR2, DHX15, DRD5, EBI3, EDNRB, ELOVL4, E…
GO:0046872	metal ion binding	GO_MolecularFunction	4.5e-06	0.01	[AARS, ABAT, ABL2, ACAT1, ACO2, ACP7, ACSM5, ACTN1, ACTN2, ACVR1, ACVR1B, ACVR1C, ACVR2A, ACVR2B, ADAM11, ADAM12, ADAMTS1, ADAMTS3, ADAMTS8, ADCY1, ADCY3, ADCY6, ADGRE5, ADH1B, ADH6, ADPGK, ADPRH, ADPRM, ADRA2A, AGBL3, AGFG1, AGTPBP1, AICDA, AIF1, AJUBA, AKAP13, AKR1B10, ALAD, ALOX12, ALOXE3, AMDHD1, AMFR, AMPD3, ANGPT2, ANKFY1, ANPEP, ANXA7, APEX1, APLF, APOBEC2, ARAP2, AREG, ARG2, ARHGEF2, ARHG…
GO:0003677	DNA binding	GO_MolecularFunction	6.7e-06	0.015	[A4GALT, ACTL6A, ADRA2A, AFF3, AGFG1, AHCTF1, AHDC1, AHRR, ALX1, ANKRD30A, APEX1, AREG, ARID1A, ARID2, ARID3A, ARID4A, ARID4B, ARID5A, ARNTL, ASCL1, ASH1L, ASH2L, ASXL1, ATR, ATXN1, BACH1, BACH2, BARX2, BATF3, BAZ2B, BBX, BCL11A, BCL6, BDP1, BEND3, BLZF1, BRD4, BTAF1, C10orf2, CALR, CAMTA1, CARF, CASP8AP2, CBFB, CBX4, CDKN2AIP, CDX1, CERS6, CGGBP1, CHD2, CHD3, CHD5, CHD6, CHD8, CLSPN, CNBP, CNRIP…
GO:0001047	core promoter binding	GO_MolecularFunction	1.9e-05	0.044	[ARNTL, CHD2, CREM, CRY1, E2F2, E2F3, E2F7, E2F8, ELK1, ELK4, EP300, ESR1, EZH2, GADD45A, GATA2, GATA3, H2AFZ, HMGA2, HNF1A, HNF4A, HOXB3, IFI16, INSM1, KCNH4, KCNH8, KLF10, KLF4, MAZ, MITF, MTF1, MYOCD, NFYA, NLRC5, NOTCH1, NR1D2, NR4A2, PAX6, PDHX, PDX1, PPARG, PSPC1, RBPJ, RORA, RREB1, RUNX1, SIRT1, SMAD1, SMAD5, SOX1, SOX3, SOX4, SP1, SP3, STAT5B, TAF1B, TCF7, TFAP2A, TFAP2C, TP53BP1, YAP1, Z…

## Sheet: Table S2d_RED MODULE
Table S2b: Gene ontologies enriched for target genes of miRNAs in the RED module		Table S2d: Gene ontologies enriched for target genes of miRNAs in the RED module
GOID	GOTerm	Ontology Source	Term PValue	Term PValue Corrected with Benjamini-Hochberg	Associated Genes Found
GO:0032989	cellular component morphogenesis	GO_BiologicalProcess	8.1e-06	0.003	[ABL2, ACTC1, ACTR2, AGRN, APP, ARHGEF2, ARHGEF28, ATP2B2, BAMBI, BCL11A, BCL2, BTBD3, CACNA1H, CAPRIN1, CHL1, CIT, COL4A1, COL4A3, COL4A5, COL9A1, CORO1C, CUX2, DMRT1, DRAXIN, DVL1, ENPP2, ENTHD1, EPHA3, EXT1, EZR, FGD4, FGD6, FGF13, FGFR3, FITM2, FNBP1L, FRS2, FZD7, GATA3, GCNT2, GNPAT, INTU, IQCB1, IQGAP1, ITSN1, KALRN, KIDINS220, KIF20B, KIF26A, KIT, KITLG, LAMA1, LDLRAD4, LIFR, LRRC70, MAP2,…
GO:0032990	cell part morphogenesis	GO_BiologicalProcess	9.9e-06	0.003	[ABL2, ACTR2, AGRN, APP, ARHGEF28, BCL11A, BCL2, BTBD3, CACNA1H, CAPRIN1, CHL1, CIT, COL4A1, COL4A3, COL4A5, COL9A1, CORO1C, CUX2, DRAXIN, DVL1, ENPP2, ENTHD1, EPHA3, EXT1, EZR, FGF13, FGFR3, FNBP1L, FRS2, GATA3, INTU, IQCB1, IQGAP1, ITSN1, KALRN, KIDINS220, KIF20B, KIF26A, KIT, KITLG, LAMA1, LIFR, LRRC70, MAP2, MARK3, MLF2, MYO9B, NEDD4L, NFATC4, NOLC1, ONECUT1, OPA3, PCDH15, PDGFB, PDGFRA, PIH1…
GO:0048858	cell projection morphogenesis	GO_BiologicalProcess	1.5e-05	0.0032	[ABL2, ACTR2, AGRN, APP, ARHGEF28, BCL11A, BCL2, BTBD3, CACNA1H, CAPRIN1, CHL1, CIT, COL4A1, COL4A3, COL4A5, COL9A1, CORO1C, CUX2, DRAXIN, DVL1, ENPP2, ENTHD1, EPHA3, EXT1, EZR, FGF13, FGFR3, FNBP1L, FRS2, GATA3, INTU, IQCB1, IQGAP1, ITSN1, KALRN, KIDINS220, KIF20B, KIF26A, KIT, KITLG, LAMA1, LIFR, LRRC70, MAP2, MARK3, MLF2, MYO9B, NEDD4L, NFATC4, NOLC1, ONECUT1, PCDH15, PDGFB, PDGFRA, PIH1D3, PL…
GO:0000902	cell morphogenesis	GO_BiologicalProcess	1.4e-05	0.0037	[ABL2, ACTR2, AGRN, APP, ARHGEF2, ARHGEF28, ATP2B2, BAMBI, BCL11A, BCL2, BTBD3, CACNA1H, CAPRIN1, CHL1, CIT, COL4A1, COL4A3, COL4A5, COL9A1, CORO1C, CUX2, DMRT1, DRAXIN, DVL1, ENPP2, ENTHD1, EPHA3, EXT1, EZR, FGD4, FGD6, FGF13, FGFR3, FITM2, FNBP1L, FRS2, FZD7, GATA3, GCNT2, INTU, IQCB1, IQGAP1, ITSN1, KALRN, KIDINS220, KIF20B, KIF26A, KIT, KITLG, LAMA1, LDLRAD4, LIFR, LRRC70, MAP2, MARK3, MEF2C,…
GO:0048666	neuron development	GO_BiologicalProcess	2.1e-05	0.004	[ABI2, ABL2, ACTR2, AGRN, APP, ARHGEF28, ATAT1, ATP2B2, BCL11A, BCL2, BLOC1S3, BLOC1S5, BTBD3, CACNA1H, CAPRIN1, CHL1, CIT, COL4A1, COL4A3, COL4A5, COL9A1, CTF1, CUX2, DHFR, DRAXIN, DVL1, ENTHD1, EPHA3, EXT1, EZR, FGF13, FGFR3, FRS2, GABRB2, GATA3, GBA2, GDPD5, GNAT2, GNGT1, GRIN3A, HMGB1, IQGAP1, ITSN1, KALRN, KIDINS220, KIF20B, KIF26A, KIT, KITLG, LAMA1, LIFR, LRRC70, MAP2, MARK3, MCF2, MEF2C, …
GO:0030182	neuron differentiation	GO_BiologicalProcess	2.4e-05	0.004	[ABI2, ABL2, ACTR2, AGRN, APP, ARHGEF28, ATAT1, ATP2B2, BCL11A, BCL2, BLOC1S3, BLOC1S5, BTBD3, CACNA1H, CAPRIN1, CHL1, CIT, CLN8, COL4A1, COL4A3, COL4A5, COL9A1, CTF1, CUX2, DHFR, DMRT3, DNMT3A, DRAXIN, DVL1, ENTHD1, EPHA3, EXT1, EZR, FGF13, FGFR3, FRS2, FZD7, GABRB2, GATA3, GBA2, GDPD5, GNAT2, GNGT1, GRIN3A, HMGB1, IQGAP1, ITSN1, KALRN, KIDINS220, KIF20B, KIF26A, KIT, KITLG, LAMA1, LIFR, LMO4, L…
GO:0050931	pigment cell differentiation	GO_BiologicalProcess	3.5e-05	0.0044	[BCL2, BLOC1S3, BLOC1S5, GNA11, HPS4, KIT, KITLG, MEF2C, RAB27A]
GO:0030335	positive regulation of cell migration	GO_BiologicalProcess	4.2e-05	0.0049	[ANGPTL3, ANO6, BCL2, CMKLR1, CXCL1, CXCL2, CXCL9, DAPK2, ENPP2, FGF13, GATA3, GCNT2, HMGB1, IKBKAP, KIF20B, KIT, KITLG, LGR6, MYO1C, NOX4, ONECUT1, PDGFB, PDGFRA, PODXL, PRKD1, PTGER3, RDX, RNMT, RRAS2, S100A14, SASH1, SDCBP, SEMA4D, SEMA6C, SHTN1, SLC8A1, SPAG9, SUN2, SWAP70, TIAM1]
GO:0006935	chemotaxis	GO_BiologicalProcess	6.6e-05	0.0071	[ABL2, ACTR2, AGRN, ANO6, APP, ARHGEF28, ARRB2, CACNA1H, CCRL2, CHL1, CMKLR1, CMTM4, COL4A1, COL4A3, COL4A5, COL9A1, CXCL1, CXCL17, CXCL2, CXCL9, CXCR5, DAPK2, DRAXIN, DVL1, ENPP2, ENTHD1, EPHA3, EXT1, EZR, FGF13, FGFR3, FRS2, GATA3, HMGB1, HRH1, ITSN1, KALRN, KIF20B, KIF26A, KIT, KITLG, LAMA1, MARK3, MLF2, MYO9B, PDGFB, PDGFRA, PRKD1, PSMB2, PSMD1, PSME4, PTPRM, RASA1, RASGEF1A, RASGRF2, REPS1, …
GO:0048699	generation of neurons	GO_BiologicalProcess	9e-05	0.0085	[ABI2, ABL2, ACTR2, AGRN, APP, ARHGEF2, ARHGEF28, ATAT1, ATP2B2, BCL11A, BCL2, BLOC1S3, BLOC1S5, BTBD3, CACNA1H, CAPRIN1, CHL1, CIT, CLN8, COL4A1, COL4A3, COL4A5, COL9A1, CTF1, CUX2, DHFR, DMRT3, DNMT3A, DRAXIN, DVL1, ENTHD1, EPHA3, EXT1, EZR, FGF13, FGFR3, FRS2, FZD7, GABRB2, GATA3, GBA2, GDPD5, GNAT2, GNGT1, GRIN3A, HMGB1, IQGAP1, ITSN1, KALRN, KIDINS220, KIF20B, KIF26A, KIT, KITLG, LAMA1, LIFR…
GO:0048812	neuron projection morphogenesis	GO_BiologicalProcess	8.9e-05	0.009	[ABL2, ACTR2, AGRN, APP, ARHGEF28, BCL11A, BCL2, BTBD3, CACNA1H, CAPRIN1, CHL1, CIT, COL4A1, COL4A3, COL4A5, COL9A1, CUX2, DRAXIN, DVL1, ENTHD1, EPHA3, EXT1, EZR, FGF13, FGFR3, FRS2, GATA3, IQGAP1, ITSN1, KALRN, KIDINS220, KIF20B, KIF26A, KIT, KITLG, LAMA1, LIFR, LRRC70, MAP2, MARK3, MLF2, NEDD4L, NFATC4, NOLC1, PDGFB, PDGFRA, PSMB2, PSMD1, PSME4, PTPRM, RASA1, RASGEF1A, RASGRF2, RNF6, RNMT, ROCK…
GO:0048667	cell morphogenesis involved in neuron differentiation	GO_BiologicalProcess	0.0001	0.0092	[ABL2, ACTR2, AGRN, APP, ARHGEF28, ATP2B2, BCL11A, BCL2, BTBD3, CACNA1H, CAPRIN1, CHL1, CIT, COL4A1, COL4A3, COL4A5, COL9A1, CUX2, DRAXIN, DVL1, ENTHD1, EPHA3, EXT1, EZR, FGF13, FGFR3, FRS2, GATA3, ITSN1, KALRN, KIDINS220, KIF26A, KIT, KITLG, LAMA1, LRRC70, MAP2, MARK3, MEF2C, MLF2, MYO7A, NFATC4, NOLC1, PCDH15, PDGFB, PDGFRA, PSMB2, PSMD1, PSME4, PTPRM, RASA1, RASGEF1A, RASGRF2, RNF6, RNMT, ROCK…
GO:0007399	nervous system development	GO_BiologicalProcess	0.00011	0.0095	[ABI2, ABL2, ACTR2, AGRN, APP, ARHGEF2, ARHGEF28, ARNT2, ARRB2, ATAT1, ATP2B2, BCL11A, BCL2, BLOC1S3, BLOC1S5, BPTF, BTBD3, CACNA1H, CAPRIN1, CHL1, CHRDL1, CIT, CLN8, COL4A1, COL4A3, COL4A5, COL9A1, CTF1, CUX2, CXCL1, DHFR, DMRT3, DNMT3A, DRAXIN, DVL1, ECE2, ENTHD1, EPHA3, EXT1, EZR, FGF13, FGFR3, FRS2, FZD6, FZD7, GABRB2, GATA3, GBA2, GDPD5, GHRH, GLRA2, GNAT2, GNGT1, GNGT2, GNPAT, GRIK1, GRIN3A…
GO:0022008	neurogenesis	GO_BiologicalProcess	0.00012	0.0097	[ABI2, ABL2, ACTR2, AGRN, APP, ARHGEF2, ARHGEF28, ATAT1, ATP2B2, BCL11A, BCL2, BLOC1S3, BLOC1S5, BTBD3, CACNA1H, CAPRIN1, CHL1, CIT, CLN8, COL4A1, COL4A3, COL4A5, COL9A1, CTF1, CUX2, DHFR, DMRT3, DNMT3A, DRAXIN, DVL1, ENTHD1, EPHA3, EXT1, EZR, FGF13, FGFR3, FRS2, FZD7, GABRB2, GATA3, GBA2, GDPD5, GNAT2, GNGT1, GRIN3A, HMGB1, IQGAP1, ITSN1, KALRN, KCNJ10, KIDINS220, KIF20B, KIF26A, KIT, KITLG, LAM…
GO:0048522	positive regulation of cellular process	GO_BiologicalProcess	0.00013	0.01	[ABI2, ABL2, ACER3, ACSL1, ACTR2, ACVR2A, ADK, AFAP1L2, AGRN, AICDA, AMER1, ANGPTL3, ANO6, APP, ARFIP2, ARHGEF17, ARHGEF2, ARNT2, ARRB1, ARRB2, ATAT1, ATP1B1, AZIN1, BAMBI, BATF, BCL11A, BCL2, BLOC1S3, BLOC1S5, BNC1, BPTF, BTRC, C1QTNF1, CACNA1H, CAMKK2, CAND1, CAPRIN1, CAT, CCNL1, CD4, CDH5, CHURC1-FNTB, CIT, CLEC4E, CLSPN, CMKLR1, CNOT7, COL4A3, COPS8, CORO1C, CPT1A, CSF3, CTBP2, CTF1, CTSC, CU…
GO:0030318	melanocyte differentiation	GO_BiologicalProcess	0.00014	0.01	[BCL2, GNA11, HPS4, KIT, KITLG, MEF2C, RAB27A]
GO:0030334	regulation of cell migration	GO_BiologicalProcess	0.00015	0.01	[ANGPTL3, ANO6, BCL2, CMKLR1, CORO1C, CXCL1, CXCL2, CXCL9, CYP1B1, DAPK2, ENPP2, FGF13, FLCN, GATA3, GCNT2, HMGB1, IKBKAP, KIF20B, KIT, KITLG, LAMA1, LDLRAD4, LGR6, MMP10, MMP3, MSN, MYO1C, NOX4, ONECUT1, PDGFB, PDGFRA, PKP2, PLCB1, PODXL, PRKD1, PTGER3, PTPRG, PTPRM, RDX, RNMT, RRAS2, S100A14, SASH1, SDC4, SDCBP, SEMA4D, SEMA6C, SGK1, SHTN1, SLC8A1, SPAG9, SRGAP2, SUN2, SWAP70, TACSTD2, TIAM1, W…
GO:0007411	axon guidance	GO_BiologicalProcess	0.00017	0.011	[ABL2, ACTR2, AGRN, APP, ARHGEF28, CACNA1H, CHL1, COL4A1, COL4A3, COL4A5, COL9A1, DRAXIN, DVL1, ENTHD1, EPHA3, EXT1, EZR, FGF13, FGFR3, FRS2, GATA3, ITSN1, KALRN, KIF26A, KIT, KITLG, LAMA1, MARK3, MLF2, PDGFB, PDGFRA, PSMB2, PSMD1, PSME4, PTPRM, RASA1, RASGEF1A, RASGRF2, RNMT, ROCK1, SDCBP, SEMA4D, SEMA6C, SHTN1, SRGAP2, TIAM1, TRPC1, TRPC6, UBA2, VAX1, ZNF280C]
GO:0000904	cell morphogenesis involved in differentiation	GO_BiologicalProcess	0.00027	0.016	[ABL2, ACTR2, AGRN, APP, ARHGEF28, ATP2B2, BAMBI, BCL11A, BCL2, BTBD3, CACNA1H, CAPRIN1, CHL1, CIT, COL4A1, COL4A3, COL4A5, COL9A1, CORO1C, CUX2, DRAXIN, DVL1, ENTHD1, EPHA3, EXT1, EZR, FGF13, FGFR3, FRS2, FZD7, GATA3, GCNT2, ITSN1, KALRN, KIDINS220, KIF26A, KIT, KITLG, LAMA1, LDLRAD4, LRRC70, MAP2, MARK3, MEF2C, MFAP2, MLF2, MYO7A, NFATC4, NOLC1, PCDH15, PDGFB, PDGFRA, PSMB2, PSMD1, PSME4, PTPRM…
GO:2000114	regulation of establishment of cell polarity	GO_BiologicalProcess	0.00029	0.017	[CDH5, GATA3, KIF20B, RAP1B, ROCK1, SHTN1]
GO:0030855	epithelial cell differentiation	GO_BiologicalProcess	0.00034	0.018	[ANXA4, ATP2B2, BCL2, CDH5, COL4A1, CPT1A, DMRT1, EHF, EZR, FGF13, FGFR3, FRS2, FZD7, GATA3, GNA11, H2AFY2, HHEX, HPS4, HRNR, INTU, IQGAP1, KIT, KITLG, LAMA1, MAF, MEF2C, MSN, MYCL, MYO7A, ONECUT1, PCDH15, PDGFB, PODXL, POU3F1, PRKCH, PRLR, RAB1A, RAB27A, RAP1B, RAPGEF6, RDX, RNMT, ROCK1, SKIL, SOX17, SOX4, STX2, TIGAR, UBA2, VDAC1, XDH, ZEB1]
GO:0030154	cell differentiation	GO_BiologicalProcess	0.00037	0.019	[ABCB5, ABI2, ABL2, ACTC1, ACTR2, ACVR2A, AGRN, AICDA, ALDH6A1, AMER1, ANKRD33, ANXA4, APP, ARHGEF2, ARHGEF28, ATAT1, ATP2B2, BAMBI, BATF, BCL11A, BCL2, BLOC1S3, BLOC1S5, BTBD3, CACNA1H, CAND1, CAPRIN1, CAT, CCRL2, CD4, CDH5, CHL1, CHRDL1, CIT, CLEC4D, CLEC4E, CLN8, CMKLR1, COL11A1, COL15A1, COL4A1, COL4A3, COL4A5, COL9A1, CORO1C, CPT1A, CSF3, CTBP2, CTF1, CUX2, CXCL17, CXCL9, DAZAP1, DHFR, DMRT1…
GO:0051270	regulation of cellular component movement	GO_BiologicalProcess	0.0005	0.024	[ABL2, ANGPTL3, ANO6, BCL2, CCSAP, CMKLR1, CORO1C, CXCL1, CXCL2, CXCL9, CYP1B1, DAPK2, ENPP2, FGF13, FLCN, GATA3, GCNT2, HMGB1, IKBKAP, KIF20B, KIT, KITLG, LAMA1, LDLRAD4, LGR6, MMP10, MMP3, MSN, MYO1C, NOX4, ONECUT1, PDGFB, PDGFRA, PKP2, PLCB1, PODXL, PRKD1, PTGER3, PTPRG, PTPRM, RDX, RNMT, ROCK1, RRAS2, S100A14, SASH1, SDC4, SDCBP, SEMA4D, SEMA6C, SGK1, SHTN1, SLC8A1, SPAG9, SRGAP2, SUN2, SWAP7…
GO:0031175	neuron projection development	GO_BiologicalProcess	0.00056	0.026	[ABI2, ABL2, ACTR2, AGRN, APP, ARHGEF28, BCL11A, BCL2, BLOC1S3, BLOC1S5, BTBD3, CACNA1H, CAPRIN1, CHL1, CIT, COL4A1, COL4A3, COL4A5, COL9A1, CUX2, DHFR, DRAXIN, DVL1, ENTHD1, EPHA3, EXT1, EZR, FGF13, FGFR3, FRS2, GATA3, GDPD5, GRIN3A, HMGB1, IQGAP1, ITSN1, KALRN, KIDINS220, KIF20B, KIF26A, KIT, KITLG, LAMA1, LIFR, LRRC70, MAP2, MARK3, MCF2, MEF2C, MLF2, NEDD4L, NFATC4, NOLC1, OPA1, PDGFB, PDGFRA,…
GO:0035023	regulation of Rho protein signal transduction	GO_BiologicalProcess	0.00066	0.029	[ABL2, ARHGEF17, ARHGEF2, ARHGEF28, ARRB1, FGD4, FGD6, FLCN, ITSN1, KALRN, MCF2, PLEKHG1, PLEKHG4, RASGRF2, TIAM1]
GO:0048520	positive regulation of behavior	GO_BiologicalProcess	0.00088	0.037	[ANO6, CMKLR1, CXCL1, CXCL2, CXCL9, DAPK2, FGF13, GHRH, HMGB1, MEF2C, NR2C2, PDGFB, PRKD1, PTGER3, RNMT, S100A14, SWAP70, TIAM1]
GO:0009893	positive regulation of metabolic process	GO_BiologicalProcess	0.0011	0.041	[ABL2, ACSL1, ACTC1, ACVR2A, AFAP1L2, AGRN, AHSA2, AICDA, AMER1, ANGPTL3, APP, ARHGAP11A, ARHGAP27, ARHGAP32, ARHGEF17, ARHGEF2, ARHGEF28, ARNT2, ARRB1, ARRB2, ASB9, ATP1B1, AZIN1, BAMBI, BATF, BCL11A, BCL2, BPTF, BTRC, C1QTNF1, CAMKK2, CAND1, CAT, CCNL1, CD4, CHM, CHURC1-FNTB, CLSPN, CNOT7, COL4A3, COPS8, CORO1C, CPT1A, CSF3, CTBP2, CTF1, CTSC, CUX2, CXCL1, CXCL9, CYCS, CYTH1, DAZAP1, DCUN1D3, D…
GO:0050905	neuromuscular process	GO_BiologicalProcess	0.001	0.041	[ABL2, APP, ATP2B2, CLN8, CSMD1, DVL1, GPR88, GRIN3A, MYO7A, NPAS3, OPA3, PCDH15, PEX5, SPG20, USH1G]
GO:0048870	cell motility	GO_BiologicalProcess	0.001	0.041	[ABI2, ABL2, ANGPTL3, ANO6, ARRB2, ATP1B1, BAMBI, BCL2, CCSAP, CHL1, CMKLR1, CORO1C, CXCL1, CXCL2, CXCL9, CYP1B1, DAPK2, DMRT1, DPP4, ENPP2, ENTHD1, EPHA3, FGF13, FLCN, FOXE1, FUT8, GATA3, GCNT2, GPC6, HMGB1, HRH1, IKBKAP, JMY, KIF20B, KIT, KITLG, LAMA1, LDLRAD4, LGR6, MBOAT7, MDK, MEF2C, MMP1, MMP10, MMP3, MSN, MYO1C, MYO9B, NOX4, ONECUT1, PDGFB, PDGFRA, PEX5, PIH1D3, PKP2, PLCB1, PLTP, PODXL, P…
GO:0030033	microvillus assembly	GO_BiologicalProcess	0.001	0.042	[EZR, PODXL, RAP1B, RAPGEF6, RDX, STX2]
GO:0016477	cell migration	GO_BiologicalProcess	0.0011	0.042	[ABI2, ABL2, ANGPTL3, ANO6, ARRB2, ATP1B1, BAMBI, BCL2, CHL1, CMKLR1, CORO1C, CXCL1, CXCL2, CXCL9, CYP1B1, DAPK2, DMRT1, DPP4, ENPP2, EPHA3, FGF13, FLCN, FOXE1, FUT8, GATA3, GCNT2, GPC6, HMGB1, HRH1, IKBKAP, KIF20B, KIT, KITLG, LAMA1, LDLRAD4, LGR6, MBOAT7, MDK, MEF2C, MMP1, MMP10, MMP3, MSN, MYO1C, MYO9B, NOX4, ONECUT1, PDGFB, PDGFRA, PEX5, PKP2, PLCB1, PODXL, PRKD1, PROS1, PRSS37, PSTPIP2, PTGE…
GO:0007266	Rho protein signal transduction	GO_BiologicalProcess	0.0011	0.042	[ABL2, ARHGEF17, ARHGEF2, ARHGEF28, ARRB1, FGD4, FGD6, FLCN, HACD3, ITSN1, KALRN, MCF2, MYO9B, PLEKHG1, PLEKHG4, RASGRF2, ROCK1, SHTN1, TIAM1]
GO:0007265	Ras protein signal transduction	GO_BiologicalProcess	0.0012	0.043	[ABI2, ABL2, ARHGEF17, ARHGEF2, ARHGEF28, ARRB1, CYTH1, FGD4, FGD6, FGF13, FGFR3, FLCN, FRS2, G3BP1, HACD3, ITSN1, KALRN, KIT, KITLG, MARK3, MCF2, MYO9B, PDGFB, PDGFRA, PLEKHG1, PLEKHG4, PSMB2, PSMD1, PSME4, RAP1B, RAPGEF6, RASA1, RASGEF1A, RASGRF2, RDX, RIT1, ROCK1, RRAS2, SDCBP, SHTN1, TIAM1]
GO:0048668	collateral sprouting	GO_BiologicalProcess	0.0016	0.045	[APP, BCL11A, DVL1, FGF13, SEMA4D, SPG20]
GO:0030031	cell projection assembly	GO_BiologicalProcess	0.0019	0.045	[ABL2, ACTR2, AGRN, ANO6, ARFIP2, CORO1C, EZR, FGD4, FGD6, FNBP1L, INTU, IQCB1, KIT, ONECUT1, PCDH15, PIH1D3, PLA2G3, PODXL, RAB1A, RAB23, RAP1B, RAPGEF6, RDX, ROCK1, SCLT1, SDCBP, SHTN1, SPAG17, SRGAP2, STK36, STX2, TACSTD2, TBC1D10A, TBC1D21, TENM1, TRAF3IP1]
GO:0007602	phototransduction	GO_BiologicalProcess	0.0019	0.046	[AGRN, ARRB1, DHRS3, FNTA, FNTB, GNA11, GNAT2, GNGT1, GNGT2, GPC5, GPC6, GUCA1B, HSPG2, NMT2, SDC4]
GO:0010646	regulation of cell communication	GO_BiologicalProcess	0.0016	0.046	[ABL2, ACVR2A, AFAP1L2, AGRN, AIDA, AMER1, APP, ARHGAP11A, ARHGAP32, ARHGEF17, ARHGEF2, ARHGEF28, ARRB1, ARRB2, ATP2B2, BAMBI, BCL2, BTRC, C1QTNF1, CAT, CD4, CHRDL1, CMKLR1, CNIH3, CNR2, COPS8, CPT1A, CSF3, CTBP2, CTF1, CTSC, CUX2, CXCL9, CYP1B1, CYTH1, DAPK2, DHRS3, DMRT1, DRAXIN, DVL1, EEF1E1, ENSA, ERN1, EZR, FBN2, FBXO9, FGD4, FGD6, FGF13, FGFR3, FLCN, FNTA, FNTB, FRS2, FZD6, FZD7, G3BP1, GAT…
GO:0048731	system development	GO_BiologicalProcess	0.0017	0.046	[ABCB5, ABI2, ABL2, ACTC1, ACTR2, ACVR2A, AGRN, AICDA, AMER1, ANGPTL3, ANKRD33, ANO6, APP, ARHGEF2, ARHGEF28, ARNT2, ARRB1, ARRB2, ATAT1, ATP2B2, BAMBI, BATF, BBX, BCL11A, BCL2, BLOC1S3, BLOC1S5, BPTF, BTBD3, BTRC, C1QTNF1, CACNA1H, CAPRIN1, CAT, CD4, CDH5, CHL1, CHM, CHRDL1, CIT, CLEC4D, CLEC4E, CLN8, CMKLR1, CNNM4, COL11A1, COL15A1, COL4A1, COL4A3, COL4A5, COL9A1, CORO1C, CRELD1, CSF3, CTF1, CU…
GO:0051129	negative regulation of cellular component organization	GO_BiologicalProcess	0.0016	0.046	[AICDA, ARHGEF2, ARRB2, BCL11A, CAPZA1, CIT, CORO1C, DMRT1, DNAJB6, DPP4, DRAXIN, DYNC1LI1, FGF13, FGFR3, FLCN, GNL3L, HMGB1, IRAK3, KCNE1, LDLRAD4, LMO4, LRRTM2, MAPRE1, MDM1, MID1, NFATC4, OPA1, PEX5, PPIF, PRKD1, RDX, RNF6, ROCK1, SDCBP, SEMA4D, SEMA6C, SGK1, SMG6, SNCA, SNX33, SPG20, SWAP70, TACSTD2, TET1, TIGAR, TNKS, TOM1L1, TRAF3IP1, TRIAP1, TRPC6, WAPL]
GO:0060429	epithelium development	GO_BiologicalProcess	0.0016	0.046	[ABL2, ANXA4, ATP2B2, BCL2, BNC1, BTRC, CAT, CDH5, COL4A1, CPT1A, DMRT1, DMRT2, DVL1, EDARADD, EHF, EZR, FGF13, FGFR3, FOXE1, FRAS1, FRS2, FZD6, FZD7, GATA3, GNA11, GPC6, H2AFY2, HHEX, HPS4, HRNR, INTU, IQGAP1, KIF20B, KIT, KITLG, LAMA1, LAMC2, LMO4, MAF, MEF2C, MLF2, MSN, MYCL, MYO7A, NFATC4, ONECUT1, OPA1, PCDH15, PDGFB, PKD2, PODXL, POU3F1, PRKCH, PRLR, RAB1A, RAB23, RAB27A, RAD51B, RAP1B, RAP…
GO:1902589	single-organism organelle organization	GO_BiologicalProcess	0.0018	0.046	[ABI2, ABL2, ACTC1, ACTR2, AICDA, ARFIP2, ARHGEF17, ARHGEF2, ARHGEF28, ARRB1, ATAT1, ATG4C, ATP1B1, BCL2, BORA, CAPZA1, CCNG1, CCNG2, CCSAP, CEP72, CHD3, CISD2, CIT, CLN8, CNIH3, CNN1, CORO1C, CSF3, CTSC, CXCL1, DMRT1, DNAJB6, DNMT3A, DR1, DVL1, DYNC1LI1, ENSA, EPHA3, ERCC6L, EZR, FEN1, FGD4, FGD6, FGF13, FGFR3, FLCN, FNBP1L, GATA3, GFI1B, GNL3L, GOSR1, GRIA1, HCFC1, HELLS, INTU, IQCB1, JMY, KALR…
GO:1990182	exosomal secretion	GO_BiologicalProcess	0.0018	0.046	[PDCD6IP, RAB27A, RAB7A, SDC4, SDCBP]
GO:0006464	cellular protein modification process	GO_BiologicalProcess	0.0018	0.046	[A4GNT, ABI2, ABL2, ACSL1, ACVR2A, AFAP1L2, AIDA, ALG10, ALG10B, ALG6, AMER1, APP, ARHGEF2, ARRB1, ARRB2, ASB9, ATAT1, ATG4C, B3GALT2, B3GNT9, BCL11A, BCL2, BTBD1, BTRC, C1QTNF1, CAMK1G, CAMKK2, CAND1, CCNG1, CCNL1, CD4, CDK17, CHM, CHURC1-FNTB, CIT, CLSPN, CNIH3, CNOT4, COPS7B, COPS8, CORO1C, CSF3, CSNK1G3, CTDSPL, CTF1, CTSC, CYCS, DAPK2, DCLK3, DCUN1D3, DOK7, DPAGT1, DPH5, DR1, DVL1, DYNC1LI1,…
GO:0030048	actin filament-based movement	GO_BiologicalProcess	0.0017	0.046	[ACTC1, FNBP1L, GPD1L, KCNE1, MYO7A, MYO9B, NEDD4L, PKP2, PTGER3, ROCK1, SHTN1, SUN2, TPM3, WIPF3]
GO:0001508	action potential	GO_BiologicalProcess	0.0019	0.046	[ATP1B1, CACNA1H, CLDN19, CNR2, ENTHD1, GNA11, GPD1L, GPR88, GRIK2, HCN4, KCNE1, NEDD4L, PKP2, SCN7A, SLC8A1]
GO:0043393	regulation of protein binding	GO_BiologicalProcess	0.0014	0.047	[ABL2, AIDA, APP, ARRB1, ARRB2, BAMBI, BCL2, BTBD1, CSF3, DVL1, GNL3L, MAPRE1, MEF2C, PDGFB, ROCK1, SPAG9, TGFBR3, TIAM1, TRIB3]
GO:0001654	eye development	GO_BiologicalProcess	0.0013	0.047	[ABCB5, ABI2, BCL2, BLOC1S3, CHRDL1, CLN8, COL4A1, CYP1B1, FBN2, FGF13, FGFR3, FRS2, GATA3, GNAT2, GNGT1, LAMA1, MAF, MAN2A1, MDM1, MFAP2, MYO7A, PDGFRA, PPP1R13L, PTPRM, RD3, SDK2, SKIL, TBC1D32, TOPORS, TRAF3IP1, VAX1, WNT6, ZEB1]
GO:0048468	cell development	GO_BiologicalProcess	0.0015	0.047	[ABI2, ABL2, ACTC1, ACTR2, AGRN, APP, ARHGEF2, ARHGEF28, ATAT1, ATP2B2, BAMBI, BCL11A, BCL2, BLOC1S3, BLOC1S5, BTBD3, CACNA1H, CAPRIN1, CDH5, CHL1, CIT, COL11A1, COL4A1, COL4A3, COL4A5, COL9A1, CORO1C, CTF1, CUX2, DHFR, DMRT1, DRAXIN, DVL1, ENTHD1, EPHA3, EXT1, EZR, FGF13, FGFR3, FRS2, FZD7, GABRB2, GATA3, GBA2, GCNT2, GDPD5, GNAT2, GNGT1, GRIN3A, HMGB1, IQGAP1, ITSN1, KALRN, KCNJ10, KIDINS220, K…
GO:0061564	axon development	GO_BiologicalProcess	0.0015	0.047	[ABL2, ACTR2, AGRN, APP, ARHGEF28, BCL11A, BCL2, CACNA1H, CHL1, COL4A1, COL4A3, COL4A5, COL9A1, DHFR, DRAXIN, DVL1, ENTHD1, EPHA3, EXT1, EZR, FGF13, FGFR3, FRS2, GATA3, ITSN1, KALRN, KIF26A, KIT, KITLG, LAMA1, LRRC70, MAP2, MARK3, MLF2, NOLC1, PDGFB, PDGFRA, PSMB2, PSMD1, PSME4, PTPRM, RASA1, RASGEF1A, RASGRF2, RNF6, RNMT, ROCK1, SDCBP, SEMA4D, SEMA6C, SHTN1, SKIL, SPG20, SRGAP2, TIAM1, TRPC1, TR…
GO:0007409	axonogenesis	GO_BiologicalProcess	0.0015	0.047	[ABL2, ACTR2, AGRN, APP, ARHGEF28, BCL11A, BCL2, CACNA1H, CHL1, COL4A1, COL4A3, COL4A5, COL9A1, DRAXIN, DVL1, ENTHD1, EPHA3, EXT1, EZR, FGF13, FGFR3, FRS2, GATA3, ITSN1, KALRN, KIF26A, KIT, KITLG, LAMA1, LRRC70, MAP2, MARK3, MLF2, NOLC1, PDGFB, PDGFRA, PSMB2, PSMD1, PSME4, PTPRM, RASA1, RASGEF1A, RASGRF2, RNF6, RNMT, ROCK1, SDCBP, SEMA4D, SEMA6C, SHTN1, SKIL, SPG20, SRGAP2, TIAM1, TRPC1, TRPC6, U…
GO:0071560	cellular response to transforming growth factor beta stimulus	GO_BiologicalProcess	0.0014	0.048	[ARRB2, BAMBI, CDH5, FBN2, FLCN, FNTA, FUT8, GCNT2, LDLRAD4, LTBP1, MEF2C, MSTN, MTMR4, NEDD4L, NOX4, ONECUT1, PDGFB, RUNX1, SDCBP, SKIL, SMAD1, SMURF1, SOX5, TGFBR3, ZEB1]
GO:0005737	cytoplasm	GO_CellularComponent	7.3e-09	1.1e-05	[A4GNT, ABCB10, ABCE1, ABI2, ABL2, ACER3, ACO2, ACSL1, ACTC1, ACTR2, ACVR2A, ADAMTS9, ADH1B, ADK, AFAP1L2, AGPS, AGRN, AHCY, AHCYL2, AICDA, AIDA, ALDH6A1, ALG10, ALG10B, ALG6, AMER1, ANGPTL3, ANKRD33, ANKRD37, ANXA4, AOX1, AP1S1, AP1S3, AP3M2, AP5M1, APP, AQP11, ARFIP2, ARHGAP11A, ARHGAP27, ARHGAP32, ARHGEF17, ARHGEF2, ARHGEF28, ARL14EP, ARL6IP1, ARMC5, ARNT2, ARRB1, ARRB2, ASB9, ATAT1, ATG4C, AT…
GO:0044424	intracellular part	GO_CellularComponent	1.6e-07	0.00012	[A4GNT, ABCA13, ABCB10, ABCE1, ABI2, ABL2, ACER3, ACO2, ACSL1, ACTC1, ACTR2, ACVR2A, ADAMTS9, ADAT2, ADH1B, ADK, AFAP1L2, AGPS, AGRN, AHCY, AHCYL2, AICDA, AIDA, AK6, ALDH6A1, ALG10, ALG10B, ALG6, AMER1, ANGPTL3, ANKRD33, ANKRD37, ANXA4, AOX1, AP1S1, AP1S3, AP3M2, AP5M1, APP, AQP11, ARFIP2, ARHGAP11A, ARHGAP27, ARHGAP32, ARHGEF17, ARHGEF2, ARHGEF28, ARL14EP, ARL6IP1, ARMC5, ARNT2, ARRB1, ARRB2, AS…
GO:0044444	cytoplasmic part	GO_CellularComponent	3.1e-07	0.00015	[A4GNT, ABCB10, ABCE1, ABI2, ABL2, ACER3, ACO2, ACSL1, ACTC1, ACTR2, ADAMTS9, ADH1B, ADK, AGPS, AGRN, AHCY, AHCYL2, AICDA, ALDH6A1, ALG10, ALG10B, ALG6, AMER1, ANGPTL3, ANKRD33, ANXA4, AOX1, AP1S1, AP1S3, AP3M2, AP5M1, APP, AQP11, ARFIP2, ARHGAP11A, ARHGAP32, ARHGEF17, ARHGEF2, ARHGEF28, ARL6IP1, ARRB1, ARRB2, ASB9, ATAT1, ATG4C, ATP10B, ATP2B2, AZIN1, B3GALT2, B3GNT9, BACE1, BCL2, BLOC1S3, BLOC1…
GO:0005829	cytosol	GO_CellularComponent	3.4e-05	0.0047	[ABI2, ABL2, ACTC1, ACTR2, ADH1B, ADK, AHCY, AHCYL2, AMER1, ANKRD33, AOX1, AP1S1, AP1S3, AP5M1, APP, AQP11, ARHGAP11A, ARHGAP32, ARHGEF17, ARHGEF2, ARHGEF28, ARL6IP1, ARRB1, ARRB2, ATAT1, ATG4C, ATP2B2, AZIN1, BCL2, BLOC1S3, BLOC1S5, BORA, BTBD3, BTRC, C1QTNF1, CAPRIN1, CAPZA1, CARNS1, CAT, CENPU, CEP72, CHM, CIT, CNOT11, CNOT4, CNOT7, COX19, CYCS, CYTH1, DDHD1, DENND4C, DERA, DHFR, DNAJB6, DPAGT…
GO:0043229	intracellular organelle	GO_CellularComponent	0.00023	0.015	[A4GNT, ABCA13, ABCB10, ABCE1, ABI2, ABL2, ACER3, ACO2, ACSL1, ACTC1, ACTR2, ADAMTS9, ADAT2, ADK, AGPS, AGRN, AHCY, AHCYL2, AICDA, AK6, ALDH6A1, ALG10, ALG10B, ALG6, AMER1, ANGPTL3, ANKRD33, ANKRD37, ANXA4, AP1S1, AP1S3, AP3M2, AP5M1, APP, ARFIP2, ARHGAP27, ARHGAP32, ARHGEF2, ARL6IP1, ARNT2, ARRB1, ARRB2, ASB9, ATAT1, ATP10B, ATP2B2, AZIN1, B3GALT2, B3GNT9, BACE1, BATF, BBX, BCL11A, BCL2, BLOC1S3…
GO:0044431	Golgi apparatus part	GO_CellularComponent	0.00034	0.018	[A4GNT, ACER3, AGRN, AP1S1, AP1S3, APP, ARFIP2, ARHGAP32, ARRB1, B3GALT2, B3GNT9, BACE1, CAMK1G, CDIPT, CNIH3, CPD, CTSC, ECE2, ENTPD4, EXT1, FNBP1L, FUT2, FUT8, GALNT12, GBA2, GBP3, GCNT2, GOSR1, GPC5, GPC6, GRIA1, HSPG2, KLHL12, LGR6, MAN1A2, MAN2A1, MLANA, PDGFB, PGAP2, PIKFYVE, PRKD1, PROS1, RAB1A, RAB2B, RAB6B, RNF13, ROCK1, SACM1L, SCOC, SDC4, SEC23IP, SERINC3, SLC2A1, SLC35A2, SLC35A3, SPG…
GO:0043231	intracellular membrane-bounded organelle	GO_CellularComponent	0.00046	0.023	[A4GNT, ABCA13, ABCB10, ABCE1, ACER3, ACO2, ACSL1, ADAMTS9, ADAT2, ADK, AGPS, AGRN, AHCY, AHCYL2, AICDA, AK6, ALDH6A1, ALG10, ALG10B, ALG6, AMER1, ANGPTL3, ANKRD33, ANKRD37, ANXA4, AP1S1, AP1S3, AP3M2, AP5M1, APP, ARFIP2, ARHGAP27, ARHGAP32, ARHGEF2, ARL6IP1, ARNT2, ARRB1, ARRB2, ASB9, ATAT1, ATP10B, ATP2B2, AZIN1, B3GALT2, B3GNT9, BACE1, BATF, BBX, BCL11A, BCL2, BLOC1S3, BLOC1S5, BNC1, BPTF, BRD…
GO:0000139	Golgi membrane	GO_CellularComponent	0.00064	0.029	[A4GNT, ACER3, AP1S1, AP1S3, APP, ARFIP2, ARHGAP32, ARRB1, B3GALT2, B3GNT9, CAMK1G, CDIPT, CNIH3, CTSC, ECE2, ENTPD4, EXT1, FUT2, FUT8, GALNT12, GBA2, GBP3, GCNT2, GOSR1, GRIA1, KLHL12, LGR6, MAN1A2, MAN2A1, PDGFB, PGAP2, PIKFYVE, PROS1, RAB1A, RAB2B, RAB6B, RNF13, ROCK1, SACM1L, SCOC, SEC23IP, SERINC3, SLC2A1, SLC35A2, SLC35A3, SPPL2A, ST6GAL1, TMED2, TMEM167B, TNKS, TRIM23, TRIP11, UXS1, ZDHHC1…
GO:0005604	basement membrane	GO_CellularComponent	0.0018	0.045	[AGRN, COL15A1, COL4A1, COL4A3, COL4A5, FRAS1, HSPG2, LAMA1, LAMC2, MEGF9, MLF2, P3H2, RUNX1]
GO:0098562	cytoplasmic side of membrane	GO_CellularComponent	0.0016	0.045	[ABL2, ARRB1, CNR2, CYTH1, EZR, FGFR3, GNAT2, GNG2, GNGT1, GNGT2, IQGAP1, KIT, PKD2, RASA1, RGS1, SHROOM4, SPPL2A, TIAM1, TXK]
GO:0098588	bounding membrane of organelle	GO_CellularComponent	0.0015	0.048	[A4GNT, ACER3, ACSL1, AGPS, ALG10, ALG10B, ALG6, AP1S1, AP1S3, AP5M1, APP, ARFIP2, ARHGAP32, ARL6IP1, ARRB1, ATP10B, B3GALT2, B3GNT9, BACE1, BCL2, CAMK1G, CAT, CD1A, CD4, CDIPT, CERS6, CISD2, CLN8, CNIH3, CPT1A, CTSC, CYBB, CYP1B1, CYP3A43, CYP3A7, CYP4F11, DHRS3, DIO1, DPAGT1, DPP4, ECE2, ELOVL2, ENTPD4, ERN1, EXT1, FADS1, FITM2, FUT2, FUT8, FXYD3, GAD1, GALNT12, GBA2, GBP3, GCNT2, GGCX, GNA11, …
GO:0044432	endoplasmic reticulum part	GO_CellularComponent	0.0014	0.048	[ACER3, ACSL1, ALG10, ALG10B, ALG6, ARHGAP32, ARL6IP1, ATP10B, BACE1, BCL2, C1QTNF1, CD4, CDIPT, CERS6, CISD2, CLN8, CNIH3, COL11A1, COL15A1, COL4A1, COL4A3, COL4A5, COL9A1, CTSC, CYP1B1, CYP3A43, CYP3A7, CYP4F11, DHRS3, DIO1, DNAJB11, DPAGT1, ELOVL2, ERN1, EXT1, FADS1, FITM2, FXYD3, GBA2, GDPD5, GGCX, GPX8, GRIA1, HACD3, ITPR1, KCNK2, LGALSL, MBOAT7, MLANA, MMP1, MTDH, NOX4, NUS1, P3H2, P4HA1, P…
GO:0016410	N-acyltransferase activity	GO_MolecularFunction	0.00086	0.037	[ARRB1, ATAT1, CERS6, GLYATL3, HCFC1, KAT7, MED22, NAA15, NAA16, NMT2, PET117, PHF20, SATL1, SUPT7L, TAF5]
GO:0016747	transferase activity, transferring acyl groups other than amino-acyl groups	GO_MolecularFunction	0.0019	0.045	[ARRB1, ATAT1, CERS6, CPT1A, ELOVL2, GLYATL3, GNPAT, GPAT2, HCFC1, KAT7, MBOAT7, MED22, NAA15, NAA16, NMT2, PET117, PHF20, SATL1, SH2D3C, SUPT7L, TAF5, ZDHHC13]
