# Supplementary material for: Co-Expression Network and Pathway Analyses Reveal Important Modules of miRNAs Regulating Milk Yield and Component Traits
Source: Int J Mol Sci. 2017 Jul 18;18(7):1560. doi: 10.3390/ijms18071560 (PMC5536048; doi:10.3390/ijms18071560)
Supplement: Supplementary file 1 [file ijms-18-01560-s001.zip › Table S3. Singaling pathways for all modules by IPA.xlsx]

## Sheet: Table S3a_GREEN MODULE
Table S3a: Signaling pathways for the GREEN module
Canonical Pathways	-log(p-value)	Molecules
RAR Activation	1.31	RDH10,MAP3K1,PDPK1,PTEN,VEGFA,TGFB2,GTF2H1,NRIP1,PML,SMAD1,HLTF,MMP1,PRKD1,PRKCA,PRKAR1A
D-myo-inositol (1,4,5,6)-Tetrakisphosphate Biosynthesis	1.34	CDC25B,DUSP28,PTPN11,SYNJ1,PTPRO,DUSP13,NUDT12,STYX,DUSP14,PTEN,SACM1L
D-myo-inositol (3,4,5,6)-tetrakisphosphate Biosynthesis	1.34	CDC25B,DUSP28,PTPN11,SYNJ1,PTPRO,DUSP13,NUDT12,STYX,DUSP14,PTEN,SACM1L
eNOS Signaling	1.41	PIK3C2A,GUCY1A3,GRB2,FLT4,PDPK1,VEGFA,CASP9,CNGB1,PTPN11,PRKAA2,PRKD1,PRKCA,PRKAR1A
nNOS Signaling in Neurons	1.41	CAPN5,CAPN2,PPP3CC,PRKD1,PRKCA
Zymosterol Biosynthesis	1.46	MSMO1,LBR
Huntington's Disease Signaling	1.46	GNG4,CAPN5,PIK3C2A,HDAC2,RCOR3,GRB2,GLS,PDPK1,CDK5R1,ZDHHC17,CASP6,CASP9,PTPN11,PSME4,TCERG1,CAPN2,GOSR1,PRKD1,PRKCA
ErbB Signaling	1.48	PIK3C2A,PTPN11,CDC42,GRB2,PAK2,TGFA,PDPK1,ERBB3,PRKD1,PRKCA
G Beta Gamma Signaling	1.53	GNG4,CDC42,GRB2,GNA12,GNAI1,PDPK1,PRKD1,PRKAR1A,PRKCA
Factors Promoting Cardiogenesis in Vertebrates	1.63	TGFBR2,BMPR1A,TGFB2,ACVR2B,SMAD1,PRKD1,NOG,ACVR2A,PRKCA
DNA Methylation and Transcriptional Repression Signaling	1.67	CHD3,HDAC2,DNMT3A,DNMT1
3-phosphoinositide Biosynthesis	1.83	DUSP28,PIK3C2A,GRB2,NUDT12,PIKFYVE,ERBB3,STYX,DUSP14,SACM1L,PTEN,CDC25B,CD28,SYNJ1,PTPN11,PTPRO,DUSP13,KIT
Neuregulin Signaling	1.96	PTPN11,GRB2,TGFA,PDPK1,ERBB3,PRKD1,CDK5R1,PRKCA,ITGA4,PTEN
PTEN Signaling	2.05	FOXO4,GRB2,FLT4,PDPK1,PTEN,TGFBR2,CASP9,CBL,SYNJ1,CDC42,BMPR1A,BCL2L11,ITGA4,MAGI3
Protein Kinase A Signaling	2.25	MYH10,PPP1CB,MYLK,AKAP11,PTEN,TGFBR2,CDC25B,PTPRO,TGFB2,PRKD1,PRKCA,GNG4,PTPRD,MAP3K1,PTCH1,YWHAZ,GNAI1,PYGL,PPP3CC,TTN,PTP4A1,PTPDC1,CNGB1,H3F3A/H3F3B,PTPN11,CDC14B,EYA3,PTGS2,PRKAR1A

## Sheet: Table S3b_BLUE MODULE
Table S3b: Signaling pathways for the BLUE module
Canonical Pathways	-log(p-value)	Molecules
Extrinsic Prothrombin Activation Pathway	1.33	PROS1,THBD,TFPI,F3
Fatty Acid β-oxidation I	1.39	ACSL3,ECHS1,SCP2,ACSL6,SLC27A1,EHHADH,HADHA,ACAA2
Dermatan Sulfate Biosynthesis	1.41	CHST2,XYLT2,CSGALNACT2,CHSY1,HS3ST2,CHST3,CHST10,B3GAT3,NDST1,CHST14,CHST15
Hepatic Cholestasis	1.44	PRKACB,LIF,ABCC2,PRKAG1,CYP8B1,IRAK1,JUN,SLC10A2,IL1RAP,MAP4K2,IFNG,MAP3K14,CYP7B1,TJP2,ADCY3,MAPK9,NR1H3,IL1R1,IL13,TRAF6,TLR4,SLCO3A1,PRKAG2,INSR,TIRAP,RXRA,ESR1,ADCY7,TNF,IRAK2,IL11,PRKCB
Xenobiotic Metabolism Signaling	1.46	MAP3K15,CAMK4,PPP2R2A,PPP2CA,PIK3R1,ABCC2,GCLC,MAPK13,CHST15,SOD3,CHST2,KL,CHST3,CHST10,GSTA1,IRS2,AHR,ALDH5A1,MAP3K14,PIK3C2A,FMO2,GRB2,RRAS,MED1,MGMT,GSTA4,MAP3K1,NQO1,MAPK9,ALDH9A1,GAB1,ALDH1L2,PPP2R3A,RBX1,HS3ST2,ALDH1A2,CAT,NCOA1,MAP3K8,ALDH3B1,RXRA,TNF,EIF2AK3,NDST1,PRKCB,MAOA
Phospholipases	1.46	PLD2,PLD3,PLA2G2D,ABHD3,PLB1,PLA2R1,PNPLA3,PLD6,PLCL2,PLCL1,PAFAH1B1,PLD1
Inhibition of Angiogenesis by TSP1	1.52	TGFBR2,VEGFA,CD47,JUN,GUCY1A3,THBS1,CD36,MAPK9,MAPK13,KDR,GUCY1B3
NF-κB Signaling	1.71	PRKACB,AZI2,CD40LG,PIK3R1,BMPR2,IRAK1,TGFBR2,BRAF,KL,TLR7,IGF1R,IRS2,LTBR,PDGFRB,EGFR,MAP3K14,TNFSF11,PIK3C2A,RRAS,GRB2,RELB,FLT4,MAP3K1,IL1R1,MALT1,TAB3,TRAF6,TLR4,NTRK2,GAB1,ARAF,NTRK3,TLR6,MAP3K8,EIF2AK2,INSR,KDR,TIRAP,MAP4K4,TNF,PRKCB
Notch Signaling	1.81	NOTCH2,ADAM17,NOTCH4,NOTCH3,HES5,DTX4,MFNG,NUMB,NCSTN,RBPJ,JAG1,DLL4
TR/RXR Activation	1.87	CAMK4,PIK3C2A,SLC2A1,GRB2,MED1,PIK3R1,NCOA6,THRA,MDM2,ME1,THRSP,ENO1,MTOR,GAB1,COL6A3,KL,NCOA1,IRS2,NCOR1,TBL1XR1,RXRA,THRB
Phototransduction Pathway	1.89	PRKACB,CNGB1,GUCY1A3,OPN5,PRKAG2,GNGT2,CNGA1,GUCY1B3,PRKAG1
LPS/IL-1 Mediated Inhibition of RXR Function	1.9	ABCC2,ABCA1,CHST15,SOD3,IRAK1,CHST2,JUN,CHST3,PPARGC1B,CHST10,GSTA1,IL1RAP,HMGCS1,ALDH5A1,ACSL3,FMO2,MGMT,GSTA4,MAP3K1,ACSL6,NR1H3,MAPK9,IL1R1,ALDH9A1,TRAF6,TLR4,ALDH1L2,CAT,ALDH1A2,HS3ST2,NCOA1,SLC27A1,ALDH3B1,RXRA,ABCC4,NDST1,TNF,MAOA
Cellular Effects of Sildenafil (Viagra)	1.95	PRKACB,MYH10,CAMK4,GUCY1A3,ITPR2,ADCY3,PPP1CB,MYLK,ITPR1,PLCL2,PDE4B,CACNA1A,PRKAG1,CALM1 (includes others),ACTA2,PRKAG2,PLCL1,ADCY7,GUCY1B3,SLC4A10
Sperm Motility	1.96	SLC9A5,PRKACB,CAMK4,GUCY1A3,ABHD3,ITPR2,PLA2R1,ITPR1,PLCL2,PDE4B,CNGA1,PRKAG1,CALM1 (includes others),CNGB1,PLA2G2D,PLB1,PRKAG2,PNPLA3,PLCL1,PAFAH1B1,GUCY1B3,PRKCB
Pentose Phosphate Pathway (Non-oxidative Branch)	1.97	RPE,TKT,RPIA
Inositol Pyrophosphates Biosynthesis	2.01	IPMK,IPPK,PPIP5K1,IP6K1
Endothelin-1 Signaling	2.16	PLD2,PIK3R1,PLA2R1,CASP4,MAPK13,BRAF,CASP9,JUN,KL,PLB1,PNPLA3,IRS2,GNA13,PLCL1,GUCY1B3,CASP10,PLD3,PIK3C2A,GUCY1A3,RRAS,GRB2,ABHD3,ITPR2,GNA12,ADCY3,MAPK9,PLD6,ITPR1,PLCL2,PLD1,GAB1,PLA2G2D,ARAF,EDNRA,PAFAH1B1,ADCY7,CASP5,PRKCB
eNOS Signaling	2.81	PRKACB,LPAR4,CAMK4,PRKAB2,PIK3R1,HSPA5,PRKAG1,VEGFA,AQP3,CASP9,KL,PRKAA2,IRS2,CHRNA5,GUCY1B3,PIK3C2A,GUCY1A3,GRB2,ITPR2,ADCY3,FLT4,HSPA9,ITPR1,CNGA1,CALM1 (includes others),LPAR6,CNGB1,GAB1,PRKAG2,KDR,ESR1,ESR2,ADCY7,PRKCB

## Sheet: Table S3c_TURQUOISE MODULE
Table S3c: Signaling pathways for the TURQUOISE module
Canonical Pathways	-log(p-value)	Molecules
Prolactin Signaling	1.3	SOCS1,RAF1,PIK3C2A,GRB2,RRAS,PIK3R1,SOCS6,PIK3R5,SOCS4,STAT3,NR3C1,IRF1,RRAS2,SP1,KL,PIK3C3,MRAS,SOCS2,PRLR,TCF7,STAT5B,MAP2K1,PRKD1,PRKCB
BMP signaling pathway	1.3	RAF1,GRB2,RRAS,BMP2,PRKAR2A,SMAD7,MAPK9,SMAD5,NOG,XIAP,SMURF1,RRAS2,PRKAG2,MRAS,MAPK10,SMAD4,BMP6,SMAD1,MAP2K1
GADD45 Signaling	1.42	CCNE1,PCNA,CCND2,GADD45A,ATR,CDK2,CDK1,CCNB1
CDK5 Signaling	1.43	RAF1,PPP2R2A,RRAS,ADCY3,PRKAR2A,ITGA6,MAPK9,DRD5,CACNA1A,CDK5R1,FOSB,PPP1R3D,RRAS2,NTRK2,PPP1R12A,PPP2R3A,PRKAG2,MRAS,MAPK10,PPP2R5C,MAP2K1,GNAL
Role of NANOG in Mammalian Embryonic Stem Cell Pluripotency	1.47	RAF1,LIF,PIK3R1,BMP2,PIK3R5,FZD1,SMAD5,LIFR,KL,PIK3C3,MRAS,SMO,SMAD4,AKT3,CTNNB1,MAP2K1,SMAD1,AKT2,PIK3C2A,RRAS,GRB2,STAT3,RRAS2,FZD6,BMP6
Nitric Oxide Signaling in the Cardiovascular System	1.48	PIK3R1,PIK3R5,ARG2,ATP2A2,VEGFA,PDE3B,KL,PIK3C3,PRKAA1,AKT3,MAP2K1,GUCY1B3,PRKD1,AKT2,PIK3C2A,FLT1,GRB2,PRKAR2A,CACNA1C,VEGFC,CACNA1A,CALM1 (includes others),PRKAG2,PDE5A,KDR,PRKCB
Cell Cycle Regulation by BTG Family Proteins	1.55	CCNE1,CNOT7,PPP2R3A,PPP2R2A,BTG1,HOXB9,PPP2R5C,CDK2,E2F2
Cell Cycle: G2/M DNA Damage Checkpoint Regulation	1.58	YWHAE,WEE1,PTPMT1,CUL1,YWHAZ,MDM2,CDK1,PPM1D,CHEK1,CCNB1,YWHAQ,TOP2B,MDM4,GADD45A,ATR
Role of CHK Proteins in Cell Cycle Checkpoint Control	1.58	PPP2R2A,RPA1,RFC5,CDK1,CHEK1,PCNA,RFC4,PPP2R3A,RAD9A,CLSPN,PPP2R5C,ATR,CDK2,E2F2
DNA damage-induced 14-3-3σ Signaling	1.61	CCNE1,AKT2,RAD9A,AKT3,ATR,CDK2,CDK1,CCNB1
STAT3 Pathway	1.61	SOCS1,RAF1,TGFBR1,FLT1,PTPN2,RRAS,TGFBR3,SOCS6,MAPK9,SOCS4,STAT3,TGFBR2,PIAS3,RRAS2,NTRK2,PIM1,MRAS,PDGFRA,MAPK10,SOCS2,INSR,KDR,MAP2K1
Oncostatin M Signaling	1.61	RAF1,RRAS2,EPAS1,RRAS,GRB2,MRAS,OSM,OSMR,STAT3,STAT5B,MAP2K1,MMP1
Integrin Signaling	1.62	RAF1,RAPGEF1,ARHGAP26,PIK3R1,PIKFYVE,TSPAN3,RHOB,MRAS,ITGAV,ACTR2,AKT2,RRAS,RALB,ITGA6,TSPAN2,BCAR3,TTN,RAP1A,ARHGAP5,DOCK1,RHOQ,RND3,ACTA2,CAPN2,CAPN7,CTTN,FNBP1,RAP2A,ARHGEF7,PIK3R5,MYLK,PPP1R12A,RHOT1,KL,PIK3C3,AKT3,RHOF,MAP2K1,ACTN1,MYL12A,PIK3C2A,ASAP1,GRB2,ITGAL,WIPF1,RRAS2,LIMS1,PAK2,NEDD9
Inhibition of Angiogenesis by TSP1	1.73	HSPG2,AKT2,TGFBR1,CASP3,MAPK9,TGFBR2,VEGFA,CD47,SDC2,MAPK10,AKT3,KDR,GUCY1B3
Extrinsic Prothrombin Activation Pathway	1.78	PROS1,F13A1,THBD,TFPI,F3
NF-κB Signaling	1.78	AZI2,RAF1,CSNK2A1,IL1A,TGFBR1,NFKBIE,BMP2,TGFBR3,PIK3R1,TLR8,PIK3R5,IRAK1,TGFBR2,TANK,TRADD,TLR10,NFKBIA,KL,PIK3C3,TLR7,MRAS,PDGFRA,AKT3,LTBR,MAP3K14,AKT2,PIK3C2A,FLT1,RRAS,GRB2,MAP3K1,IRAK3,MALT1,IL1R1,IL36B,TRAF6,CSNK2A2,RIPK1,RRAS2,NTRK2,BCL10,TLR6,FCER1G,MAP3K8,INSR,KDR,MAP3K3,PRKCB
Epithelial Adherens Junction Signaling	1.79	RAPGEF1,TGFBR1,TGFBR3,CTNNA1,AFDN,ACVR2B,CLIP1,TGFBR2,AGGF1,MRAS,AKT3,NECTIN1,CTNNB1,ACVR1C,ACTN1,ACTR2,DLL1,AKT2,RRAS,ACVR1,RAP1A,ACVR1B,FGF1,MET,NOTCH4,MAGI1,RRAS2,ACTA2,MAGI2,NOTCH1,ACVR2A
Wnt/β-catenin Signaling	1.79	CSNK2A1,MMP7,TGFBR1,PPP2R2A,TGFBR3,ACVR2B,FZD1,KREMEN1,TGFBR2,RARB,SMO,DKK2,AKT3,PPP2R5C,CTNNB1,ACVR1C,SOX4,GJA1,AKT2,CSNK1G3,ACVR1,MDM2,ACVR1B,CSNK2A2,SOX6,PPP2R3A,FZD6,TLE4,DVL3,LRP1,ACVR2A
HIPPO signaling	2.02	YWHAE,YAP1,FAT4,RASSF6,PPP2R2A,CUL1,YWHAZ,FRMD6,SMAD5,TP53BP2,YWHAQ,ITCH,PPP1R3D,PPP1R12A,PPP2R3A,AJUBA,SMAD4,PPP2R5C,PATJ,SMAD1,LATS1
TGF-β Signaling	2.23	RAF1,TGFBR1,BMP2,ACVR2B,SMAD5,SMURF1,TGFBR2,MRAS,SMAD4,VDR,TFE3,MAP2K1,SMAD1,ACVR1C,RRAS,GRB2,SMAD7,ACVR1,MAPK9,ACVR1B,TRAF6,RRAS2,RNF111,ACVR2A,PMEPA1
Factors Promoting Cardiogenesis in Vertebrates	2.24	TGFBR1,BMP2,TGFBR3,ACVR1,SMAD5,FZD1,ACVR2B,NOG,ACVR1B,TGFBR2,CCNE1,FZD6,SMO,SMAD4,CTNNB1,BMP6,SMAD1,ACVR1C,CDK2,PRKD1,LRP1,ACVR2A,PRKCB

## Sheet: Table S3d_RED MODULE
Table S3d: Signaling pathways for the RED module
Canonical Pathways	-log(p-value)	Molecules
PCP pathway	1.39	ROCK1,DVL1,FZD6,WNT6,SDC4
Mechanisms of Viral Exit from Host Cells	1.46	PRKCH,PDCD6IP,ACTC1,PRKD1
Signaling by Rho Family GTPases	1.48	ACTR2,NOX4,GNA11,GNG2,PIKFYVE,RDX,ARHGEF17,ROCK1,ARFIP2,CIT,CYBB,ARHGEF2,ACTC1,FRS2,MSN
fMLP Signaling in Neutrophils	1.76	ACTR2,NOX4,RRAS2,GNG2,CYBB,PLCB1,PRKCH,ITPR1,NFATC4,FRS2,PRKD1
Granulocyte Adhesion and Diapedesis	1.8	MMP3,CLDN19,RDX,MMP10,SDC4,CXCL9,CSF3,HRH1,CXCL1,CXCL2,IL1RAP,MMP1,MSN
Agranulocyte Adhesion and Diapedesis	1.81	HRH1,MMP3,CLDN19,RDX,MMP10,CXCL1,SDC4,CXCL9,CXCL2,ACTC1,MMP1,MSN
Purine Nucleotides Degradation II (Aerobic)	1.86	NT5E,XDH,AOX1
Adenosine Nucleotides Degradation II	2.01	NT5E,XDH,AOX1
Factors Promoting Cardiogenesis in Vertebrates	2.4	NOX4,TGFBR3,DVL1,FZD6,PRKCH,MEF2C,SMAD1,PRKD1,ACVR2A
Urate Biosynthesis/Inosine 5'-phosphate Degradation	2.42	NT5E,XDH,AOX1
Guanosine Nucleotides Degradation III	2.7	NT5E,XDH,AOX1
