# Supplementary material for: Co-Expression Network and Pathway Analyses Reveal Important Modules of miRNAs Regulating Milk Yield and Component Traits
Source: Int J Mol Sci. 2017 Jul 18;18(7):1560. doi: 10.3390/ijms18071560 (PMC5536048; doi:10.3390/ijms18071560)
Supplement: Supplementary file 1 [file ijms-18-01560-s001.zip › Table S4.Upstream transcription regulators for all modules.xlsx]

## Sheet: Sheet1
Table S4: transcription factors enriched for target genes of miRNAs in each module
Analysis	Transcription factors	p-value of overlap	Target molecules in dataset
M.BLUE	HOXA7	0.00161	CD93,EDNRA,EGFR,IL7R,KCNA3,MSI2,PGR,SOX4,TSC22D1
M.BLUE	TP53	0.00162	ABCC2,ACAA2,ACE,ACSL3,ACTA2,ACTN1,ADAMTSL4,ADGRE5,ADORA2B,ALDH1A2,ALDH9A1,ANTXR1,APBB2,AQP3,ASF1B,ATG4A,ATXN1,BAG1,BAK1,BCL2,BCL2L11,BIRC5,BMF,BNIP3,BRAF,C2,CAMK2N1,CAND1,CARS,CASP4,CASP9,CAT,CCL4,CCNE2,CCNK,CD247,CD44,CD47,CD59,CDK1,CDKN1B,CDKN2A,CEP55,CNN3,COL3A1,COL5A2,CSTF1,CTGF,CTNNB1,CXCL12,CXCR2,CYP19A1,DDX3X,DICER1,DNM1L,DSN1,DUSP4,DUSP6,EDIL3,EGFR,EIF2AK3,EIF2B1,EIF4G3,ENSA,EPHA2,ERCC3,E…
M.BLUE	CREBBP	0.00214	ADAM12,AHI1,BCL2,BIRC5,CAMK4,CBL,CD44,CD53,CD59,CD80,CDKN1B,CNN3,CXCL12,CXCR3,CYP8B1,DDX3Y,DUSP4,EDARADD,EHHADH,EOMES,EPO,FASLG,FGL1,FOSL2,FRMD4B,GIMAP4,GM2A,GRIA2,GRIA3,HIST3H2A,HLA-DRA,HMGCS1,HSD11B1,IFNG,IGF1R,IL2RB,IL7R,IRF1,JUN,KIF1B,KLF2,LIG4,LPL,MAP3K8,MDM2,MGMT,MYO1F,NTRK3,OPRM1,PDGFRB,PGR,PPFIBP2,PPM1E,RTP4,SCN4B,SDHC,SELP,SLC18A2,SLC7A11,SPSB1,STAT4,TAP2,TAPBP,TBX19,THRSP,TNC,TNF,TNFSF1…
M.BLUE	PAX7	0.0022	ABCA1,AHR,ATP11A,EMB,FAM107B,GALNT13,ID2,IL13RA1,MDFIC,MEST,NQO1,PPARG,PRRX1,SCLT1,TOB1,ZNF407
M.BLUE	HHEX	0.0072	KDR,MYH10,NRP1,TEK,VEGFA
M.BLUE	SMARCA2	0.00769	CD36,CD44,CXCL13,EPO,HES5,KDR,MYLK,MYT1L,NME1,PPARG,RBL1,RIC8B
M.BLUE	NFIL3	0.00819	CD40LG,EOMES,FAS,HAVCR2,ID2,IFNG,IL13,TNF,TNFSF10
M.BLUE	EOMES	0.00844	BHLHE22,C3orf58,CDH8,CHRNA7,DUSP4,FASLG,IFNG,IL2RB,MICAL2,NEFL,NHLH2,NRP2,RND3,SATB2,TNFSF10
M.BLUE	EGR2	0.009	BAK1,BCL2,BCL2L11,BNIP3L,CAMK4,CHRNA7,CNGB1,CYP19A1,FASLG,GRIA2,HOMER1,HOXB3,HSPA5,ID2,IFNG,IL7R,JUN,KDR,KITLG,PLCL1,PPP2CA,RALGAPA1,ROBO1,SART1,SLC16A1,STAT5A,TCEB3,TNFRSF8,TNFSF10,TNFSF11,VEGFA
M.BLUE	YAP1	0.0112	ACTA2,BCL2L11,BIRC5,CCNF,CDK1,CTGF,DIAPH3,DICER1,EGFR,FGF1,ID1,ID2,IGF1R,PPP1R3B,RASSF4
M.BLUE	MED13	0.012	ELN,ENO1,NTRK2,PPARG,THRSP,TKT,TMEM45B
M.BLUE	FOXP3	0.0121	BCL2,BCL2L11,CCR4,CD40LG,CTLA4,DUSP4,DUSP6,FASLG,ID2,IFNG,IGSF3,IKZF2,IL7R,IRAK1,MAPK9,NRP1,NTRK3,PIM2,POLD3,PTPN22,RGS1,TNF,TRAF6,VEGFA
M.BLUE	CTNNB1	0.016	ACTA2,ADAM17,ADGRG2,ADSS,AHR,AIM1,ALCAM,ALDH1A2,ATP6V0A1,BCL2,BCL2L11,BIRC5,BMF,CADM1,CALM1 (includes others),CAPZB,CCNE2,CD44,CDKN1B,CDKN2A,COL4A5,COL4A6,CTGF,CTNNA2,CTNNB1,CXCL12,CYP19A1,CYP7B1,CYP8B1,DDX17,DDX50,DIAPH3,DLL4,EDIL3,EGFR,EOMES,EPHB2,EPHB3,ERBB3,ESR2,FAS,FASLG,FOSL1,GALC,GJA1,GNA12,GREM1,HTATIP2,ID2,IL13,IL1R1,IRF8,ITGAL,ITSN1,JCHAIN,JUN,KIT,LPL,ME1,MTMR7,MYLK,NCAM1,NOTCH3,NRP2,NU…
M.BLUE	DDIT3	0.0186	ATG5,AVIL,BAK1,BCL2,BCL2L11,BHLHE22,CASP4,HSPA5,IFNG,IRAK2,LCN2,PPARG,STAT5A,TRIB3,XPOT
M.BLUE	BCL3	0.0233	AP1S1,CD80,ICAM1,ID1,ID2,IFNG,IL13,IRF1,JUN,PDK4,PLAUR,TNF,VLDLR
M.BLUE	MAML1	0.0239	HES5,IL7R,MYLK,RND3
M.BLUE	KAT2B	0.024	CD80,CTGF,HSPA5,KLF2,NR1H3,PTCH1,RARB,TGFBR2,THRSP,TNF
M.BLUE	KLF2	0.0243	ACE,CCL4,CD36,CD40LG,CD93,CTGF,CXCR3,CXCR5,DOCK2,ELN,F3,ID1,KDR,KITLG,LEPR,MAPK9,MYH10,NQO1,PDPN,PLPP3,PPARG,PROS1,PTGIS,PTPRJ,RGS3,RNASE2,S1PR1,SLC2A1,SMURF2,TFPI,THBD,THBS1,TNF,TNFRSF8,TRAF6
M.BLUE	ARNT	0.0245	ADAM17,AHR,BCL2,BNIP3,CXCR3,CYP2S1,ENO1,EPO,GSTA1,ID2,INSR,IRS2,MPP1,NDUFS2,NDUFS3,NDUFS4,NQO1,PGM2,RGS5,S1PR1,SIM1,SLC2A1,TPI1,VEGFA
M.BLUE	NFATC3	0.0265	ACTA2,AIF1,BCL2,CASP10,CD40LG,CXCR5,FASLG,GJA1,IFNG,IL13,JUN,PPARG,TNF,TNFSF11
M.BLUE	SREBF2	0.0265	ABCA1,ACAA2,CYP7B1,CYP8B1,FADS2,FDFT1,HMGCS1,IRS2,LRP1,MVK,RDH11,TFF3,THRSP,TMEM97
M.BLUE	NOTCH3	0.0291	ACTA2,ACTN1,BCL2,BIRC5,CDKN1B,GUCY1B3,HES5,ID1,MSR1,PDGFRB,RGS5
M.BLUE	NOTCH4	0.0297	ACTA2,CDKN1B,DLL4,FLT4,HES5,RGS5,TEK
M.BLUE	SP4	0.0297	BIRC5,CDKN1B,EGFR,HSPA5,IGF1R,IL2RB,VEGFA
M.BLUE	STAT3	0.0338	ACTA2,AHR,ARG1,BAK1,BCL2,BCL2L11,BEX2,BIRC5,BMF,CAT,CCL4,CCNC,CD274,CD40LG,CD80,CDK1,CDKN1B,CDKN2A,COL3A1,CTGF,CTLA4,CXCL12,CXCL13,CXCR2,CXCR3,DNMT3B,EIF2AK2,EOMES,ESR1,ESR2,F3,FAS,FASLG,FCGR1A,FLRT3,FUT4,GBP2,GBP3,GJA1,HES5,ICAM1,ID2,IFI30,IFNG,IGF1R,IKZF2,IL11,IL13,IL1R1,IL2RB,IL4R,IL6ST,IRF1,IRF9,JAG1,KDR,KLF4,LEPR,LIF,LTBR,NOTCH3,NOX5,NRP1,NRP2,OAS1,OAS2,PCSK1,PDIA4,PGR,PHLDA1,PIM2,PLAUR,PSIP…
M.BLUE	TBX21	0.0376	CCR4,CD38,CXCR3,EOMES,HAVCR2,IFNG,IL13,IL2RB,IL6ST,RUNX1,STAT4,TGFBR2,TNFSF11
M.BLUE	CTBP2	0.0461	DLL4,EOMES,MDM2,NEFL
M.BLUE	MAFF	0.0461	ABCC4,ABCC5,GCLC,NQO1
M.BLUE	ATXN1	0.0461	ATP2A2,ATXN1,ITPR1,VEGFA
M.BLUE	MAFK	0.0461	ABCC4,ABCC5,EGLN3,GCLC,GSTA1,NQO1
M.BLUE	PAX6	0.0463	CASP9,CCT6B,CDH8,CENPN,CUX2,DDX3Y,DERL2,EEF2K,EN1,EOMES,GAB1,GLP1R,KIF1B,LRRC32,MOCS3,NCAM1,NEDD1,OAS1,OFD1,PCSK1,SMC2,SPAG1,TFCP2,TMX1,TNC,VEGFA
M.BLUE	BHLHE22	0.0484	BHLHE22,ZBTB18
M.BLUE	MTF2	0.0484	CDKN2A,KLF4
M.BLUE	NR2C1	0.0484	EPO,RARB
M.BLUE	XBP1	0.0489	APBB2,ATP2A2,BCL2,BET1,CAT,COPZ1,CRK,DAD1,DERL1,DNAJB2,DNAJC10,EIF2AK3,ESR1,ETS1,FAS,GCC1,GOLGA4,GOSR2,HLA-DRA,HM13,HSPA5,ICAM1,KLF4,LMAN1,NR1H3,PDIA4,PHLDA2,PRNP,S1PR1,SEC23A,SEC24D,SERP1,SERPINA1,SRPRB,STX18,TNF,TNFSF11,TRAM1,XRCC6
M.GREEN	EHMT2	0.00615	ACTR6,CXCL12,KMT2E,NCOA3,PTGS2,ZEB2
M.GREEN	ZNF350	0.00633	GADD45A,MMP9
M.GREEN	SMAD7	0.00842	ACVR2A,ACVR2B,BCL2L11,BMPR1A,COL2A1,GADD45A,MMP1,MMP9,TGFA,TGFB2,TGFBR2,TPM3,VEGFA,XIAP
M.GREEN	MITF	0.013	ABCB5,ALCAM,CCNG2,CDC25B,CDK5R1,CEP55,COL2A1,CTSK,DSTYK,EDNRB,IL6R,ITGA4,KIF20A,KIT,RMI1,SORT1,TDRD7,USP48,YAP1
M.GREEN	HHEX	0.0138	MYH10,NRP1,VEGFA
M.GREEN	SP1	0.016	ADH5,ATP7A,B4GALT5,CAT,CCND2,CCND3,CCNG2,CD28,CDC25B,COL2A1,CXCL12,DNMT3A,HDAC2,HGF,IL15,KIT,MIER1,MMP1,MMP9,MYLK,NCOA3,NOX5,PDHX,PLAA,PRKCA,PSIP1,PTGER4,PTGS2,RECK,SELL,SERPINE2,TGFB2,TGFBR2,UGDH,VEGFA,YY1,ZEB2
M.GREEN	RYBP	0.018	CCND2,HOXA7
M.GREEN	CCND1	0.019	ARMCX1,CCND2,CCND3,CEP55,DNMT1,ELOVL7,EPHA2,ERI1,GALNT11,HERC3,KIF20A,LCORL,MYLK,PDCD4,QKI,RNF170,SERF2,SERINC3,SOX4,SRGAP2,TBCK,TGFBR2
M.GREEN	TP53	0.0191	ADAM8,ADH5,ANTXR1,APBB2,ARL6IP1,ATXN1,BCL2L11,CAND1,CASP6,CASP9,CAT,CCND2,CCND3,CCNG2,CDC25B,CEP55,CHD3,CHIC1,CKAP2,COL2A1,CPOX,CTF1,CTSK,CXCL12,DCK,DLD,DLGAP5,DNMT1,EIF4G3,ELK4,EPHA2,FAM120A,FKBP1A,FRMD4A,GADD45A,GNAI1,GRB2,GSR,GTF2H1,HDAC2,HMGB1,HNRNPA2B1,KIT,KITLG,LBR,MAN2A1,MFAP2,MIS18BP1,MMP1,MMP9,MYH10,NMU,NRP1,P4HA1,PDCD6IP,PDHX,PML,POLK,PPIC,PPM1A,PRKCA,PRKD1,PTCH1,PTEN,PTGS2,PTP4A1,PTPN1…
M.GREEN	SMAD2	0.0203	BCL2L11,CCNG2,COL2A1,HHEX,IL6R,MMP9,S1PR1,TPM3,XIAP
M.GREEN	VAV2	0.0209	CD69,CDC42,HGF,TGFA
M.GREEN	TAL1	0.0301	CCNG2,CD69,CMTR2,CUL4A,CYLD,EEF1E1,GUCY1A3,KIF20A,KIT,LCORL,MAP3K1,NR4A3,PTGER4,RBM7,SOX4,TOB1
M.GREEN	SMAD3	0.0347	ABI2,BCL2L11,CCND2,CCNG2,COL2A1,IL15,JAG1,MMP1,MMP9,PTGS2,S1PR1,SMAD1,TGFA,TGFB2,TPM3,VEGFA,XIAP,ZEB2
M.RED	MYB	0.000841	BCL2,CD4,COL4A1,FUT8,GATA3,ITPR1,KIT,KITLG,MMP1,MMP3,SOCS2
M.RED	LMO2	0.0196	GATA3,KIT
M.RED	HOXC6	0.0201	BCL2,PDE4DIP,PDGFRA,RUNX1,SH3D19
M.RED	SMAD1	0.0232	COL4A1,CXCL2,HHEX,PDGFB,SMAD1
M.RED	JUNB	0.0272	CXCL2,CYP1B1,MMP1,MMP10,MMP3,ROCK1,SERP1,SGK1,SLC8A1,SWAP70
M.RED	ARNT	0.0311	BCL2,CDCP1,CSF3,CYP1B1,MYO1C,PGM2,SIM1,SLC2A1,TP53RK
M.RED	ZNF384	0.0315	MMP1,MMP3
M.RED	NACC1	0.0315	BCL2,HMGB1
M.RED	PML	0.0439	ANXA4,CAT,CIT,CPT1A,DNAJB6,MAF,MMP10,PRKCH,RRAS2,SLC35A2
M.TURQUOISE	SMAD7	3.49e-06	ACTA2,ACVR1,ACVR1B,ACVR2A,ACVR2B,AREG,BCL2L11,BMP2,CCNA2,CCNB1,CCNE1,CDK1,CDKN1B,CDKN2B,COL1A1,COL1A2,COL3A1,COL6A3,DCN,DNMT3B,FAS,FURIN,GADD45A,HMOX1,ID2,IFNG,ITGA6,LTBP2,MET,MMP1,MMP12,NET1,NFKBIA,PCNA,PMEPA1,SMAD7,SP1,TGFBI,TGFBR1,TGFBR2,TPM3,VEGFA,XIAP
M.TURQUOISE	YY1	0.00015	ABCE1,ACTA2,BCL2L1,BCL2L11,BIRC5,BMP6,CALR,CCNA2,CCNB1,CCR5,CENPE,CLU,COL19A1,COL1A1,CXCL12,CXCR4,CYP24A1,DKK2,DMD,DNAJB4,EIF4G2,FAS,HMOX1,IFNG,KDR,KIF11,KIF20A,KIF23,KIF2C,KIF5B,MATR3,MCM6,MDM2,NR3C1,PCNA,PDGFRA,POLA1,POLH,RAB8B,RAD18,RBBP4,RLIM,RND3,SCARB1,SIM1,SLC1A2,SLC25A4,SYNCRIP,TGFBI,TGFBR1,TP53INP1,UHRF1,VEGFA,VEGFC,WSB1,YWHAE
M.TURQUOISE	E2F7	0.000163	CCNA2,CCNB1,CDK1,CHEK1,DHFR,E2F2,E2F8,KIF23
M.TURQUOISE	TP53	0.00022	ABAT,ACAT1,ACSL3,ACTA2,ACTN1,ADAMTSL4,ADD3,ADGRE5,ADORA2B,ADRB2,AKAP12,AKT3,ANKH,APEX1,ARAP2,AREG,ARHGAP5,ARHGEF2,ASPM,ASXL1,ATAD2,ATG10,ATG7,ATXN1,BCL2L1,BCL2L11,BIRC5,BLZF1,BNIP3,BTG1,C2,CALU,CAND1,CASP3,CAT,CAV2,CCL4,CCNA2,CCNB1,CCND2,CCNE1,CCNK,CD47,CDC42EP3,CDK1,CDK2,CDKN1B,CEP55,CERS6,CHD3,CHEK1,CKAP2,CLU,CNN3,CNOT11,COL1A1,COL1A2,COL3A1,COL5A2,COL9A1,CSF3R,CSTF1,CTF1,CTNNB1,CTSB,CXCL12,CXC…
M.TURQUOISE	CCND1	0.000242	ABCC4,AREG,ARMCX1,ASPM,ATAD2,BIRC5,BRWD1,C12orf76,CCNA2,CCND2,CCNE1,CDK2,CDKN1B,CDKN2B,CEP55,CLSPN,COL1A1,COL5A2,DKK2,DNMT1,E2F7,E2F8,EIF5A2,ELAVL1,ELOVL7,ENDOD1,EPHA2,EREG,ERI1,FGF7,GALNT11,HACL1,HECTD2,HIST1H4H,ITGAV,KIF11,KIF20A,KIF2C,KNL1,LCORL,MAFF,MAGI2,MED30,MTFR2,MYLK,NCAPH,NT5E,PCNA,PDCD4,PMEPA1,PPARG,PPCS,RFC5,RNF170,RRM2,SERF2,SERINC3,SOX4,SRGAP2,TBCK,TGFBR2,TOR3A,TP53INP1,TSC1,UHRF1,V…
M.TURQUOISE	NFYB	0.000398	ABCD2,ACTA2,ARID4B,BCL2L1,BCL2L11,BET1,CCNB1,CCSAP,CDK1,COL1A1,COL1A2,CPEB3,CTNNB1,CYTIP,ELAVL1,EPAS1,F8,FAM49B,FAS,FBXO42,FIZ1,GADD45A,GALNT2,GPR160,GRIA4,HCCS,HLA-DQB1,HSPA13,ICK,KCTD1,KIAA0930,KMT2E,LCOR,MARCH5,MED21,METTL9,OAT,PAQR5,PCNA,PDIA4,PSMC6,RHOB,RRM2,RWDD2A,SCARB1,SESN1,SLC25A28,SNAPC1,SNX6,SON,SPAG16,TGFBR2,TJP1,TMBIM6,TMEM218,TMEM87A,TSNAX,UBE3B,UHRF1,USP13,ZBTB49,ZNF765
M.TURQUOISE	MED1	0.00128	BCL11A,BCL2L1,BCL6,BIRC5,CCNB1,CCND2,CCNE1,CDK1,CDK2,CYP24A1,EHHADH,FABP4,GADD45A,HPRT1,HSD17B4,ID2,INSM1,IRF4,KLF4,LBR,LIF,MDM2,MET,NFKBIA,NR3C1,PDK4,PIM1,PPARG,PRLR,RARB,SEPT6,TET2,VDR,ZMYND11
M.TURQUOISE	EHF	0.00129	ANPEP,CASP3,CDK1,CDKN1B,EHF,EREG,GPR68,HIST1H4H,HMOX1,IL13,KDR,KIT,KLK7,MET,MMP1,PGLYRP4,RBPJ,STAT5B,TFPI,THBD,TNC,VEGFA,VEGFC,VNN1,ZFP36L1
M.TURQUOISE	STAT3	0.00155	ACTA2,ANGPT2,APEX1,AREG,ARG2,BCL2L1,BCL2L11,BCL6,BECN1,BEX2,BIRC5,C5,C5AR1,CASP3,CAT,CCDC88A,CCL4,CCNB1,CCNC,CCND2,CCNE1,CCR5,CD80,CD86,CD9,CDK1,CDKN1B,CHEK1,CMPK2,COL1A1,COL1A2,COL3A1,CTF1,CTLA4,CTSB,CTTN,CXCL12,CXCL6,CXCL9,CXCR2,CXCR4,DLL1,DNMT1,DNMT3B,DVL3,EPAS1,ESR1,F3,FAS,FASLG,FCER1G,FCGR1A,FFAR2,FLRT3,FLT1,GADD45A,GATA3,GBP5,GJA1,HLA-DRB5,HMOX1,HNRNPD,ID2,IFI16,IFI30,IFNB1,IFNG,IKZF2,IL10,…
M.TURQUOISE	BMI1	0.0024	BMI1,BNIP3,CCNE1,CDC14A,CDKN1B,CDKN2B,CLVS2,FAM45A,HOXB9,LOX,MET,NID1,P4HA1,ST18,VEGFC,VEZT
M.TURQUOISE	YAP1	0.0044	ACTA2,AREG,BCL2L1,BCL2L11,BIRC5,BMP2,CASP3,CCNF,CDK1,DIAPH3,DICER1,FGF1,ID2,MCM6,NEK2,POLA1,PPP1R3B,UHRF1
M.TURQUOISE	SMAD3	0.00892	ACTA2,ADAM12,AREG,ARID3A,BCL2L11,BMP2,BMP6,CCL4,CCND2,CCNE1,CDKN2B,COL1A1,COL1A2,COL3A1,COL6A3,CTNNB1,EREG,ESR1,FNDC5,GATA3,HMOX1,ID2,IFNB1,IFNG,IL13,JUNB,LUM,MMP1,MMP12,MXD1,NET1,PCNA,PMEPA1,PTHLH,RHOB,S1PR1,SKIL,SLC25A4,SMAD1,SMAD5,SMAD7,SSTR2,STAT3,TGFBR1,TNC,TPM3,VEGFA,VEGFC,XIAP,ZEB2,ZFP36
M.TURQUOISE	MYB	0.00924	ANPEP,ATP2B1,BCL2L1,BIRC5,CBX4,CCNB1,CCNE1,CD34,CDK1,CDKN2B,COL1A2,CXCL12,CXCR4,GATA3,IL13,KDR,KIT,KITLG,KLF4,MMP1,PAX6,PCNA,POLA1,RYK,SOCS2
M.TURQUOISE	STAT5A	0.0119	AHSA2,BCL11A,BCL2L1,BCL6,C15orf48,CASP3,CCND2,CCNE1,CCR5,CDKN1B,CHEK1,EGLN3,EPAS1,EPOR,ESR1,FABP4,FAS,FASLG,FCER1G,FOSB,FOXQ1,GADD45A,GALC,HIST1H1C,ID2,IFNG,IRF1,KIT,KLF10,KLRG1,LTBR,MDM2,MMP7,MUC20,OSM,PIM1,PPARG,PRLR,RORA,RPA1,S1PR5,SLC2A1,SLC7A8,SNTB1,SOCS1,SOCS2,SP1,SREBF1,STAT5B,TANK,TGFBI,TGFBR2,TIMP4,TLE4,TM4SF1,TNFRSF9,TPM3,TROVE2,WARS,XIAP,ZFP36
M.TURQUOISE	LHX2	0.0133	COL1A1,GNAL,LIF,OSM,PAX6,ROBO1
M.TURQUOISE	SMAD4	0.0143	ANGPT2,AREG,BMI1,BMP2,CCND2,CCNE1,CDC42EP3,CDK17,CDKN1B,CDKN2B,CELF2,COCH,COL1A2,CTNNB1,EREG,GADD45A,GJA1,HEBP1,HMGA2,HMOX1,HRH2,ID2,IFNG,IL10,IL11,IRAK3,ITGA6,LEMD3,MDM2,MET,MMP1,NAMPT,NFKBIA,OVOL1,PAX6,PTHLH,RUNX1,SGK1,SKIL,SLC25A4,SMAD4,SMAD7,SMO,SRCAP,SSTR2,TNC,TPM3,VEGFA,XIAP,ZFP36
M.TURQUOISE	FOXO4	0.0147	BCL2L1,BCL6,BNIP3,CCND2,CDC42EP3,CDKN1B,CDKN2B,FDFT1,GADD45A,HMGCS1,LEMD3,NAMPT,OVOL1,SGK1,SLC2A1,VEGFA
M.TURQUOISE	E2F8	0.0165	CCNA2,CCNB1,CDK1,CHEK1,KIF23
M.TURQUOISE	CDKN2B	0.0165	CD80,CD86,DHFR,DNMT1,DNMT3B
M.TURQUOISE	HHEX	0.0165	FLT1,ITGAV,KDR,TEK,VEGFA
M.TURQUOISE	RNF2	0.0167	CBX4,CCND2,CDC14A,CDKN1B,CLVS2,HAND1,HOXB3,HOXC6,MCC,PDGFRA,PHC1,PHC2
M.TURQUOISE	BACH1	0.0178	CALM1 (includes others),CXCR4,DNAJC7,EWSR1,GSTA1,HMOX1,MMP1,SLC7A11,TFE3
M.TURQUOISE	SP3	0.0266	ABCA1,ABCD2,ACTA2,ADD3,AHRR,AKAP12,ALOX12,ANGPT2,BIRC5,CD2AP,CDK5R1,CDKN1B,COL1A1,COL1A2,CYP7B1,DHFR,DMD,EREG,ESR1,F3,FAS,FLT1,FOSL1,IL10,IL1A,KDR,KLF4,MAT2B,MET,MSH6,MYLK,PRKRA,PRLR,PROCR,RECK,RRAS,SCARB1,SGK1,SP1,SREBF1,TGFBR1,TGFBR2,TGFBR3,TNC,VEGFA
M.TURQUOISE	TOB1	0.0335	ATR,BCL2L1,CCNA2,CDK2,CDKN1B,CHEK1,IKBIP,MBNL2,MIS18BP1,PLAC8,RBBP6,SNRK,SON,WDHD1
M.TURQUOISE	SMAD2	0.0382	ACTA2,ADAM12,BCL2L11,BECN1,CDKN2B,FLT1,FURIN,HES1,HMOX1,IFNG,MET,NET1,PTHLH,S1PR1,SKIL,SMAD4,SMAD7,TPM3,VEGFC,XIAP
M.TURQUOISE	SIN3A	0.043	ARID4B,BCL6,CASP3,CCND2,COL1A2,E2F2,ESR1,IFNG,KLF10,MAP4,NEFH,RARB,SET,TGFBR2,TP53BP1
M.TURQUOISE	HDAC1	0.043	AKAP12,ANGPT2,APEX1,ATG7,BAMBI,BCL6,CCNA2,CCNB1,CCND2,CCNE1,CD34,CDK1,CDK2,CDKN1B,COL1A2,COL9A1,DCLRE1C,DHFR,E2F2,ESR1,FABP4,FAS,FLT1,HES1,IFNB1,IL10,IL13,KDR,MDM2,MYO1F,NEFH,NFKBIA,OSCAR,PPARG,RBBP7,RECK,RHOB,RRM2,RRM2B,SERPINB2,SGK1,SLC1A2,SLC35D1,SREBF1,STAT3,TGFBR2,UHRF1,VDR
M.TURQUOISE	HLX	0.0433	AREG,BMP2,CCNB1,CD34,CTSS,HES1,IFNG,IL4R,KYNU,PLXNA1,SENP6
M.TURQUOISE	KLF4	0.0485	ACTA2,ACVR1,ACVR2A,ADRB2,ATP2A2,BCL2L1,BMI1,CASP3,CCNB1,CCND2,CD34,CDKN1B,CDKN2B,CENPE,COL1A1,CTNNB1,DLL1,EPHA2,FLT1,FOXF1,HAND1,HES1,IER5,IL10,KDR,KLF4,NCKAP1,NOTCH1,NOTCH4,OVOL1,PDGFRA,SERPINB2,SMAD1,SMAD4,SOCS1,TEK,THBD,TNC,VEGFA,YAP1
